# Supplementary material for: A novel nature-inspired feature selection algorithm for efficient moisture estimation in fruits using RF-Sensed data
Source: PeerJ journal article supplement (doi:10.7717/peerj-cs.3142), 2025-09-26
Supplement: AFulls11.xlsx [file AFulls11.xlsx]

## Sheet: Sheet1
Frequency	0.0° Complex	0.0° dB	0.0° Mag	0.0° Phase	0.0(rad) Phase	12.0° Complex	12.0° dB	12.0° Mag	12.0° Phase	12.0(rad) Phase	24.0° Complex	24.0° dB	24.0° Mag	24.0° Phase	24.0(rad) Phase	36.0° Complex	36.0° dB	36.0° Mag	36.0° Phase	36.0(rad) Phase	48.0° Complex	48.0° dB	48.0° Mag	48.0° Phase	48.0(rad) Phase	60.0° Complex	60.0° dB	60.0° Mag	60.0° Phase	60.0(rad) Phase	72.0° Complex	72.0° dB	72.0° Mag	72.0° Phase	72.0(rad) Phase	84.0° Complex	84.0° dB	84.0° Mag	84.0° Phase	84.0(rad) Phase	96.0° Complex	96.0° dB	96.0° Mag	96.0° Phase	96.0(rad) Phase	108.0° Complex	108.0° dB	108.0° Mag	108.0° Phase
5.1	(0.02884994+0.1498507j)	-16.3288	0.152603	79.1025	1.3806	(0.01866486+0.1685825j)	-15.4108	0.169613	83.6821	1.46053	(0.03500316+0.1636773j)	-15.526	0.167378	77.9289	1.36012	(0.0414242+0.1528246j)	-16.0082	0.158339	74.834	1.3061	(0.02858842+0.1587763j)	-15.8457	0.16133	79.793	1.39265	(0.03669827+0.1704088j)	-15.1733	0.174316	77.8467	1.35868	(0.04724158+0.1573446j)	-15.6881	0.164284	73.288	1.27912	(0.04910989+0.1729169j)	-14.9064	0.179755	74.145	1.29407	(0.02481797+0.1799964j)	-14.8129	0.181699	82.1495	1.43378	(0.01562035+0.167126j)	-15.5013	0.167854	84.6604
5.1005	(0.02960677+0.1479551j)	-16.4269	0.150888	78.6842	1.3733	(0.02059602+0.1653694j)	-15.564	0.166647	82.9006	1.44689	(0.03586484+0.159561j)	-15.7274	0.163542	77.3321	1.3497	(0.04259767+0.1493786j)	-16.1747	0.155334	74.0837	1.293	(0.02932106+0.1548819j)	-16.0471	0.157633	79.2801	1.3837	(0.03731218+0.1671611j)	-15.3261	0.171275	77.4172	1.35119	(0.04810397+0.1554593j)	-15.7706	0.162732	72.8063	1.27071	(0.04918101+0.1687513j)	-15.101	0.175772	73.7517	1.28721	(0.02490131+0.1767162j)	-14.9691	0.178462	81.9792	1.43081	(0.01664115+0.1639685j)	-15.6603	0.164811	84.2049
5.101	(0.02905684+0.1437162j)	-16.6759	0.146624	78.5699	1.3713	(0.02008319+0.1618466j)	-15.7516	0.163088	82.9265	1.44734	(0.03511565+0.1562572j)	-15.9092	0.160154	77.3344	1.34974	(0.04189784+0.1460636j)	-16.3658	0.151954	73.9946	1.29145	(0.02977978+0.1515702j)	-16.2232	0.154468	78.8844	1.37679	(0.03825587+0.1629835j)	-15.5242	0.167413	76.7905	1.34025	(0.04767993+0.1513603j)	-15.9889	0.158693	72.5151	1.26563	(0.04861958+0.1650973j)	-15.284	0.172107	73.5908	1.2844	(0.02521927+0.1724869j)	-15.173	0.174321	81.6817	1.42562	(0.01659148+0.1604782j)	-15.8455	0.161334	84.0973
5.1015	(0.03006969+0.1397772j)	-16.8948	0.142975	77.8592	1.3589	(0.02074869+0.1601794j)	-15.8356	0.161518	82.6193	1.44198	(0.03501042+0.1541123j)	-16.0247	0.158039	77.2011	1.34741	(0.04317624+0.1435024j)	-16.4865	0.149857	73.2548	1.27854	(0.0299549+0.1486044j)	-16.3864	0.151593	78.6033	1.37189	(0.03882926+0.1619246j)	-15.5709	0.166515	76.5152	1.33544	(0.04863772+0.148777j)	-16.1083	0.156525	71.8966	1.25483	(0.05070727+0.1622313j)	-15.3925	0.169971	72.6428	1.26786	(0.02725654+0.1711032j)	-15.226	0.173261	80.9489	1.41282	(0.01842941+0.1578315j)	-15.9773	0.158904	83.3399
5.102	(0.02913408+0.1385199j)	-16.9818	0.141551	78.1224	1.36349	(0.02113281+0.1569036j)	-16.0093	0.15832	82.3292	1.43692	(0.03582138+0.1512732j)	-16.1678	0.155457	76.6778	1.33828	(0.04311183+0.14045j)	-16.6585	0.146918	72.9359	1.27297	(0.02980538+0.1474176j)	-16.455	0.1504	78.5698	1.3713	(0.03804734+0.1596457j)	-15.6969	0.164117	76.5951	1.33684	(0.04869168+0.1458366j)	-16.2637	0.15375	71.537	1.24856	(0.04951681+0.1595593j)	-15.5422	0.167066	72.7591	1.26989	(0.02573496+0.1680466j)	-15.3907	0.170006	81.2933	1.41884	(0.01675314+0.1568681j)	-16.0401	0.15776	83.9041
5.1025	(0.03068837+0.1348843j)	-17.1816	0.138331	77.1825	1.34709	(0.0224364+0.1535295j)	-16.1844	0.15516	81.6858	1.42569	(0.03575832+0.1479471j)	-16.3513	0.152207	76.4124	1.33365	(0.04324753+0.1370188j)	-16.852	0.143682	72.4826	1.26506	(0.03085512+0.1429722j)	-16.6973	0.146264	77.8217	1.35824	(0.03849296+0.1553165j)	-15.9168	0.160015	76.0805	1.32786	(0.04893104+0.1417805j)	-16.479	0.149987	70.9595	1.23848	(0.05145129+0.1559054j)	-15.6938	0.164176	71.7363	1.25203	(0.02784408+0.164199j)	-15.5695	0.166543	80.3756	1.40282	(0.01814912+0.1520545j)	-16.2986	0.153134	83.1934
5.103	(0.03010609+0.1304099j)	-17.4683	0.13384	77.0006	1.34391	(0.02323907+0.1503647j)	-16.3546	0.15215	81.2144	1.41746	(0.03671927+0.1439691j)	-16.5609	0.148578	75.6918	1.32107	(0.04453572+0.1326908j)	-17.0796	0.139965	71.4464	1.24698	(0.03133696+0.1398702j)	-16.8728	0.143338	77.3718	1.35039	(0.03960309+0.151301j)	-16.1154	0.156398	75.3319	1.31479	(0.04923036+0.1389181j)	-16.631	0.147383	70.4865	1.23022	(0.05204045+0.150914j)	-15.9375	0.159635	70.974	1.23873	(0.02880898+0.160403j)	-15.7579	0.16297	79.818	1.39309	(0.01878249+0.1485626j)	-16.4929	0.149745	82.7944
5.1035	(0.03079582+0.128139j)	-17.6025	0.131788	76.4863	1.33494	(0.02348105+0.147599j)	-16.5098	0.149455	80.9607	1.41303	(0.03695175+0.1415056j)	-16.698	0.146251	75.365	1.31537	(0.04417995+0.1311912j)	-17.1754	0.13843	71.3885	1.24596	(0.0313961+0.1374077j)	-17.0188	0.140949	77.1295	1.34616	(0.04042067+0.1487843j)	-16.2396	0.154177	74.8011	1.30553	(0.04984664+0.1357093j)	-16.7982	0.144574	69.8315	1.21879	(0.05188584+0.149312j)	-16.023	0.15807	70.8377	1.23635	(0.02846299+0.1608076j)	-15.7399	0.163307	79.9626	1.39561	(0.01924207+0.1475748j)	-16.5465	0.148824	82.5712
5.104	(0.03265779+0.1262189j)	-17.6961	0.130375	75.4935	1.31761	(0.02530809+0.1433161j)	-16.7407	0.145534	79.9854	1.39601	(0.03940019+0.1381097j)	-16.8557	0.14362	74.0775	1.2929	(0.04676278+0.1267517j)	-17.3867	0.135103	69.7494	1.21736	(0.03307908+0.1344372j)	-17.1743	0.138447	76.1766	1.32953	(0.04212756+0.1452695j)	-16.4058	0.151255	73.8281	1.28854	(0.05202646+0.1320888j)	-16.9563	0.141966	68.5018	1.19558	(0.05422421+0.1463564j)	-16.1331	0.156078	69.6706	1.21598	(0.0316116+0.1548302j)	-16.0255	0.158024	78.4605	1.36939	(0.02066061+0.1435747j)	-16.7694	0.145054	81.8113
5.1045	(0.03349398+0.1233142j)	-17.8706	0.127782	74.8042	1.30558	(0.02631116+0.1424405j)	-16.7816	0.14485	79.5345	1.38814	(0.04052754+0.1350208j)	-17.0173	0.140972	73.2925	1.27919	(0.04770623+0.1245882j)	-17.4963	0.13341	69.0476	1.20511	(0.03431811+0.1312623j)	-17.35	0.135674	75.3482	1.31507	(0.04378201+0.1428144j)	-16.5145	0.149375	72.9563	1.27333	(0.05196564+0.1278944j)	-17.1994	0.138049	67.8873	1.18486	(0.05520244+0.1421568j)	-16.3347	0.152499	68.7778	1.2004	(0.03163479+0.1531656j)	-16.1154	0.156398	78.3302	1.36712	(0.02158551+0.1415045j)	-16.8847	0.143141	81.3268
5.105	(0.03569356+0.1193148j)	-18.0939	0.124539	73.3452	1.28012	(0.02815745+0.1388985j)	-16.9711	0.141724	78.5403	1.37079	(0.04245421+0.1307273j)	-17.2372	0.137448	72.0086	1.25679	(0.04839568+0.1194954j)	-17.7934	0.128924	67.952	1.18599	(0.0354175+0.1267668j)	-17.6135	0.131622	74.3901	1.29835	(0.04674484+0.1385928j)	-16.6973	0.146264	71.3617	1.2455	(0.05427666+0.1251023j)	-17.3057	0.136369	66.546	1.16145	(0.05779336+0.1382074j)	-16.4895	0.149804	67.3071	1.17473	(0.03281119+0.1487834j)	-16.3427	0.152358	77.5636	1.35374	(0.02201727+0.1366021j)	-17.1795	0.138365	80.8439
5.1055	(0.03678717+0.1168198j)	-18.239	0.122475	72.5205	1.26572	(0.02945081+0.1377039j)	-17.0268	0.140818	77.928	1.3601	(0.04348628+0.1299067j)	-17.2661	0.136992	71.492	1.24777	(0.0501125+0.1189866j)	-17.7809	0.129109	67.1611	1.17218	(0.03825294+0.1263521j)	-17.5875	0.132016	73.1564	1.27682	(0.04764003+0.1363595j)	-16.8061	0.144442	70.7421	1.23468	(0.05609557+0.1224343j)	-17.4144	0.134673	65.3842	1.14117	(0.05837081+0.1365838j)	-16.5635	0.148534	66.8599	1.16693	(0.03595213+0.1467664j)	-16.4144	0.151106	76.2358	1.33057	(0.02673551+0.13594j)	-17.1682	0.138544	78.8736
5.106	(0.03753624+0.1146991j)	-18.3669	0.120685	71.8789	1.25452	(0.03215014+0.1339913j)	-17.2154	0.137794	76.5074	1.33531	(0.04488122+0.1272077j)	-17.4002	0.134893	70.5662	1.23161	(0.05153707+0.1161513j)	-17.919	0.127072	66.0728	1.15319	(0.03929698+0.124326j)	-17.6952	0.130389	72.4593	1.26465	(0.04882096+0.1337852j)	-16.9289	0.142415	69.9519	1.22089	(0.05815924+0.1211914j)	-17.4305	0.134424	64.3638	1.12336	(0.06048337+0.1344342j)	-16.6292	0.147414	65.7765	1.14802	(0.03784364+0.1443157j)	-16.5249	0.149195	75.3063	1.31434	(0.02682446+0.1336069j)	-17.3118	0.136273	78.6476
5.1065	(0.04079274+0.1123048j)	-18.4538	0.119484	70.0373	1.22238	(0.03401782+0.1313252j)	-17.351	0.13566	75.4776	1.31733	(0.04794491+0.1248584j)	-17.4743	0.133747	68.9935	1.20416	(0.05275848+0.1131375j)	-18.0733	0.124834	64.9993	1.13445	(0.04052265+0.1206245j)	-17.9069	0.127249	71.4307	1.2467	(0.05166566+0.13092j)	-17.0313	0.140746	68.4641	1.19492	(0.05893039+0.1181031j)	-17.5892	0.131989	63.482	1.10797	(0.06318139+0.1303459j)	-16.7815	0.144851	64.1396	1.11945	(0.04113423+0.1428135j)	-16.5585	0.148619	73.9321	1.29036	(0.03045698+0.1297129j)	-17.5073	0.133241	76.7861
5.107	(0.04234313+0.1093832j)	-18.6146	0.117293	68.8382	1.20145	(0.03710621+0.1284109j)	-17.4797	0.133665	73.8826	1.28949	(0.05030502+0.1202097j)	-17.7004	0.130311	67.2918	1.17446	(0.05407177+0.1097693j)	-18.2469	0.122364	63.7754	1.11309	(0.04428992+0.1174544j)	-18.0252	0.125527	69.3395	1.2102	(0.05437984+0.1279977j)	-17.1353	0.13907	66.9818	1.16905	(0.06209452+0.1143354j)	-17.7139	0.130109	61.494	1.07327	(0.06630097+0.1279443j)	-16.8266	0.144103	62.6067	1.09269	(0.0424158+0.1387954j)	-16.7647	0.145132	73.0069	1.27421	(0.03273042+0.1287581j)	-17.5326	0.132853	75.7374
5.1075	(0.04378392+0.106897j)	-18.7471	0.115516	67.7265	1.18205	(0.03708443+0.1263713j)	-17.6083	0.1317	73.6454	1.28535	(0.05130225+0.1196502j)	-17.7088	0.130185	66.7919	1.16574	(0.05669564+0.1081443j)	-18.2653	0.122105	62.3338	1.08793	(0.04424157+0.1164725j)	-18.0902	0.124592	69.2009	1.20778	(0.05542817+0.1258941j)	-17.2304	0.137556	66.2373	1.15606	(0.06313896+0.1120124j)	-17.8164	0.128582	60.591	1.05751	(0.06588081+0.1253773j)	-16.9767	0.141632	62.2799	1.08699	(0.04472759+0.1361137j)	-16.8766	0.143274	71.8092	1.25331	(0.03273533+0.1260483j)	-17.7058	0.13023	75.4416
5.108	(0.0462958+0.1052671j)	-18.7862	0.114998	66.2604	1.15646	(0.04075942+0.1259119j)	-17.5659	0.132345	72.0625	1.25773	(0.05341506+0.118278j)	-17.7358	0.12978	65.6958	1.14661	(0.05980704+0.1069974j)	-18.2318	0.122578	60.7966	1.0611	(0.04796167+0.114919j)	-18.0948	0.124526	67.3467	1.17542	(0.05808077+0.1238009j)	-17.2816	0.136748	64.8665	1.13213	(0.06609606+0.1104547j)	-17.8071	0.12872	59.1037	1.03155	(0.06953741+0.1226415j)	-17.0166	0.140984	60.4469	1.055	(0.04820183+0.1359497j)	-16.8182	0.144242	70.4777	1.23007	(0.03609033+0.1250953j)	-17.708	0.130197	73.907
5.1085	(0.04795802+0.1039433j)	-18.8259	0.114473	65.232	1.13851	(0.0419701+0.1233851j)	-17.6992	0.130328	71.214	1.24292	(0.05629521+0.1154862j)	-17.8235	0.128477	64.0125	1.11723	(0.06215423+0.1042045j)	-18.3204	0.121333	59.1854	1.03298	(0.04973629+0.111659j)	-18.2561	0.122235	65.9904	1.15175	(0.06032558+0.1231226j)	-17.2588	0.137107	63.8968	1.11521	(0.06646861+0.1087059j)	-17.8955	0.127417	58.5562	1.022	(0.07067032+0.120589j)	-17.0916	0.139771	59.6279	1.0407	(0.04837234+0.133462j)	-16.9568	0.141958	70.0773	1.22308	(0.03755615+0.123888j)	-17.7576	0.129455	73.1355
5.109	(0.05125211+0.1023742j)	-18.8249	0.114487	63.4058	1.10664	(0.04536505+0.1229681j)	-17.65	0.131069	69.7501	1.21737	(0.05898498+0.1150676j)	-17.7677	0.129305	62.8598	1.09711	(0.06360923+0.1022235j)	-18.3876	0.120398	58.1078	1.01417	(0.05360943+0.1109134j)	-18.1885	0.12319	64.2034	1.12056	(0.06283565+0.1204051j)	-17.341	0.135815	62.4414	1.08981	(0.0694689+0.1060332j)	-17.9401	0.126763	56.7687	0.990801	(0.07528123+0.1188507j)	-17.0349	0.140687	57.6494	1.00617	(0.0520655+0.132919j)	-16.9083	0.142753	68.6093	1.19746	(0.04198009+0.1221931j)	-17.7745	0.129203	71.0396
5.1095	(0.05258938+0.1005817j)	-18.9001	0.1135	62.3971	1.08903	(0.04858946+0.1219931j)	-17.6338	0.131314	68.2828	1.19176	(0.0610709+0.1133062j)	-17.8073	0.128717	61.6758	1.07645	(0.06634408+0.1012112j)	-18.343	0.121018	56.7551	0.990563	(0.05422653+0.1096575j)	-18.2492	0.122333	63.6872	1.11155	(0.06509437+0.1192364j)	-17.339	0.135848	61.3687	1.07109	(0.07227424+0.103992j)	-17.9485	0.126641	55.2008	0.963435	(0.0769347+0.1185834j)	-16.9938	0.141354	57.0252	0.995278	(0.05518894+0.1300503j)	-16.9986	0.141276	67.0053	1.16946	(0.04383774+0.1191538j)	-17.9265	0.126962	69.801
5.11	(0.05592819+0.09756132j)	-18.9804	0.112455	60.176	1.05027	(0.05118064+0.1199158j)	-17.6957	0.130381	66.887	1.1674	(0.06412578+0.1105791j)	-17.8675	0.127827	59.8902	1.04528	(0.06860599+0.09922543j)	-18.3706	0.120634	55.3394	0.965855	(0.05651823+0.1083545j)	-18.2579	0.122209	62.4532	1.09001	(0.06743995+0.1169374j)	-17.3939	0.134991	60.0272	1.04767	(0.07423375+0.1034363j)	-17.9022	0.127317	54.3339	0.948306	(0.07971612+0.1158177j)	-17.0403	0.1406	55.4608	0.967973	(0.05849525+0.1298759j)	-16.9273	0.142441	65.7535	1.14762	(0.04739839+0.1185266j)	-17.8794	0.127653	68.2037
5.1105	(0.05938519+0.09838878j)	-18.792	0.114922	58.8858	1.02775	(0.05459452+0.1185295j)	-17.6879	0.130498	65.2693	1.13916	(0.06722194+0.1109046j)	-17.7421	0.129687	58.7789	1.02589	(0.07180621+0.09903206j)	-18.2497	0.122325	54.0549	0.943435	(0.05871893+0.1065888j)	-18.2947	0.121693	61.15	1.06727	(0.07082867+0.1160268j)	-17.3332	0.135937	58.598	1.02273	(0.07698821+0.1013265j)	-17.9064	0.127257	52.7723	0.921051	(0.08320566+0.1147854j)	-16.9683	0.14177	54.0624	0.943567	(0.06053726+0.1280743j)	-16.975	0.141661	64.7012	1.12925	(0.05042346+0.1174788j)	-17.8665	0.127843	66.7703
5.111	(0.06017349+0.09812235j)	-18.7782	0.115104	58.4813	1.02069	(0.05698626+0.1184892j)	-17.6228	0.131481	64.3152	1.12251	(0.06968995+0.1095135j)	-17.734	0.129807	57.529	1.00407	(0.07417532+0.09779315j)	-18.2202	0.122742	52.82	0.921882	(0.06225662+0.1067382j)	-18.1619	0.123568	59.7465	1.04277	(0.074305+0.1153109j)	-17.2543	0.137178	57.2027	0.998376	(0.08063606+0.1006395j)	-17.791	0.128959	51.297	0.895302	(0.08512223+0.1140336j)	-16.9359	0.142301	53.2599	0.929561	(0.0638326+0.1278129j)	-16.9014	0.142866	63.4614	1.10761	(0.0528967+0.1176818j)	-17.7866	0.129024	65.7966
5.1115	(0.06302506+0.09600643j)	-18.7978	0.114845	56.7164	0.989888	(0.05984386+0.1176925j)	-17.5863	0.132033	63.0477	1.10039	(0.07122402+0.1082984j)	-17.7465	0.12962	56.6685	0.989052	(0.07597033+0.09543006j)	-18.2744	0.121977	51.4773	0.898448	(0.06613159+0.1038144j)	-18.1956	0.123089	57.5022	1.0036	(0.07784843+0.1153672j)	-17.1287	0.139176	55.989	0.977192	(0.08373365+0.09964297j)	-17.7109	0.130154	49.9584	0.871939	(0.08840065+0.1113706j)	-16.9426	0.14219	51.5591	0.899877	(0.06791379+0.1265027j)	-16.8581	0.14358	61.7706	1.0781	(0.05594035+0.1153068j)	-17.845	0.12816	64.12
5.112	(0.06643119+0.09649501j)	-18.6251	0.117151	55.4549	0.96787	(0.06287578+0.1167281j)	-17.5501	0.132585	61.6908	1.07671	(0.07662473+0.107844j)	-17.5692	0.132294	54.6057	0.953048	(0.07941404+0.09626774j)	-18.076	0.124796	50.4798	0.881039	(0.06892485+0.1053022j)	-18.0027	0.125854	56.7935	0.991234	(0.07959175+0.1144784j)	-17.113	0.139428	55.1908	0.963262	(0.0870603+0.1003669j)	-17.5318	0.132865	49.061	0.856275	(0.09116386+0.1128346j)	-16.769	0.14506	51.0638	0.891231	(0.07030413+0.1271695j)	-16.7541	0.145309	61.0645	1.06578	(0.0588362+0.116692j)	-17.6754	0.130686	63.2427
5.1125	(0.06909732+0.09686691j)	-18.4901	0.118986	54.4989	0.951185	(0.06448241+0.1158603j)	-17.5494	0.132596	60.9017	1.06294	(0.07772618+0.1086833j)	-17.4828	0.133617	54.4291	0.949967	(0.08102268+0.09507908j)	-18.0674	0.124919	49.5637	0.865049	(0.07034847+0.1052359j)	-17.9524	0.126584	56.2379	0.981537	(0.08085272+0.113107j)	-17.1376	0.139034	54.4415	0.950184	(0.08754084+0.09895156j)	-17.5808	0.132117	48.5013	0.846508	(0.09170253+0.1126895j)	-16.7555	0.145287	50.8626	0.88772	(0.07348933+0.1272282j)	-16.6579	0.146928	59.9885	1.047	(0.06052664+0.1175202j)	-17.576	0.132191	62.7501
5.113	(0.07104898+0.09715847j)	-18.39	0.120365	53.8232	0.939391	(0.0684884+0.1174893j)	-17.3296	0.135994	59.7607	1.04302	(0.08096763+0.1068074j)	-17.4561	0.134028	52.8353	0.92215	(0.08428966+0.09525182j)	-17.9108	0.127191	48.4939	0.846379	(0.07276732+0.106568j)	-17.7854	0.129042	55.6738	0.97169	(0.0842113+0.1145214j)	-16.945	0.14215	53.6717	0.936749	(0.0904265+0.09942968j)	-17.432	0.134399	47.715	0.832784	(0.09661182+0.1113415j)	-16.6292	0.147414	49.0516	0.856112	(0.07628774+0.1257673j)	-16.648	0.147096	58.7599	1.02555	(0.06433981+0.1163022j)	-17.5287	0.132913	61.0481
5.1135	(0.07315033+0.09544545j)	-18.3981	0.120253	52.5331	0.916875	(0.06953258+0.1163793j)	-17.3568	0.135569	59.1432	1.03224	(0.08224817+0.1083457j)	-17.3274	0.136028	52.7969	0.921479	(0.08541579+0.09570387j)	-17.837	0.128277	48.2511	0.84214	(0.07462563+0.1039867j)	-17.8563	0.127993	54.335	0.948325	(0.08575768+0.1131301j)	-16.9566	0.141961	52.8362	0.922166	(0.09200624+0.09827618j)	-17.4176	0.134623	46.8873	0.818337	(0.09849408+0.1114527j)	-16.5516	0.148737	48.532	0.847043	(0.0774617+0.1266416j)	-16.5682	0.148453	58.5475	1.02185	(0.06417181+0.1176403j)	-17.4576	0.134005	61.3879
5.114	(0.07455201+0.09701829j)	-18.2476	0.122354	52.4602	0.915602	(0.07330404+0.1174118j)	-17.1763	0.138416	58.0221	1.01268	(0.08499838+0.1080871j)	-17.2336	0.137505	51.8189	0.904411	(0.08879629+0.09681118j)	-17.6303	0.131367	47.4726	0.828553	(0.07904752+0.105198j)	-17.6157	0.131587	53.0782	0.926389	(0.08805604+0.1135576j)	-16.851	0.143698	52.2089	0.911217	(0.09609617+0.09874406j)	-17.2159	0.137786	45.7786	0.798987	(0.1006632+0.1117807j)	-16.4535	0.150426	47.9956	0.837682	(0.08067389+0.1258782j)	-16.5065	0.149511	57.3447	1.00085	(0.06774142+0.1168052j)	-17.3916	0.135027	59.8883
5.1145	(0.07833438+0.09764659j)	-18.049	0.125184	51.2626	0.894701	(0.07528521+0.1182304j)	-17.0672	0.140165	57.5124	1.00378	(0.08684602+0.1086324j)	-17.1347	0.13908	51.3595	0.896392	(0.08971315+0.0952353j)	-17.6654	0.130837	46.7102	0.815247	(0.08056301+0.1052493j)	-17.5528	0.132544	52.5678	0.917481	(0.0916502+0.1118997j)	-16.7941	0.144642	50.6812	0.884554	(0.09643831+0.09783474j)	-17.2418	0.137375	45.4118	0.792586	(0.1037126+0.1111974j)	-16.3599	0.152056	46.9947	0.820212	(0.08193748+0.1268186j)	-16.4213	0.150986	57.1335	0.997168	(0.0703628+0.1175121j)	-17.2677	0.136967	59.0881
5.115	(0.07907389+0.09773705j)	-18.012	0.125719	51.0255	0.890563	(0.07735577+0.1183335j)	-16.9926	0.141374	56.827	0.991818	(0.08996868+0.1076319j)	-17.06	0.140282	50.108	0.87455	(0.09137257+0.09599058j)	-17.554	0.132526	46.4119	0.810041	(0.0806041+0.1067097j)	-17.4754	0.133731	52.9341	0.923874	(0.09406922+0.1139249j)	-16.6099	0.147743	50.4531	0.880572	(0.09952899+0.09943011j)	-17.035	0.140685	44.9715	0.784901	(0.1049423+0.1112658j)	-16.3091	0.152948	46.6753	0.814637	(0.08598164+0.1276311j)	-16.2557	0.153891	56.0329	0.977959	(0.07275179+0.1181173j)	-17.1569	0.138725	58.3699
5.1155	(0.08062807+0.09735476j)	-17.9645	0.126407	50.3688	0.879102	(0.07901661+0.1180012j)	-16.9534	0.142014	56.1927	0.980748	(0.09173419+0.1065521j)	-17.0403	0.140601	49.2738	0.859989	(0.09321191+0.0950331j)	-17.5154	0.133116	45.5543	0.795072	(0.08334659+0.1066388j)	-17.3711	0.135346	51.9896	0.907389	(0.095676+0.1130862j)	-16.5872	0.14813	49.7673	0.868603	(0.1000013+0.09931485j)	-17.0194	0.140939	44.8027	0.781954	(0.1060477+0.1106512j)	-16.2912	0.153264	46.217	0.806639	(0.08609042+0.1275582j)	-16.2557	0.153892	55.9842	0.977108	(0.07432896+0.1178217j)	-17.1205	0.139308	57.7538
5.116	(0.08186647+0.0998453j)	-17.7803	0.129117	50.6505	0.884019	(0.07992616+0.1196765j)	-16.8381	0.143912	56.263	0.981974	(0.09150807+0.1096274j)	-16.9054	0.1428	50.1476	0.875241	(0.0954068+0.09670515j)	-17.339	0.135847	45.3872	0.792156	(0.083837+0.1075609j)	-17.3053	0.136374	52.0658	0.90872	(0.09649337+0.1157763j)	-16.4368	0.150715	50.1906	0.875991	(0.1013695+0.1001398j)	-16.9242	0.142491	44.6504	0.779296	(0.1072882+0.1134476j)	-16.1295	0.156145	46.5984	0.813295	(0.0883531+0.1285235j)	-16.1396	0.155963	55.4935	0.968545	(0.07444502+0.1196105j)	-17.0227	0.140886	58.1021
5.1165	(0.08215916+0.09969527j)	-17.7756	0.129187	50.508	0.88153	(0.08115369+0.1196692j)	-16.7972	0.144591	55.8568	0.974886	(0.09322465+0.1105207j)	-16.7974	0.144588	49.8522	0.870086	(0.09537613+0.09619731j)	-17.3635	0.135464	45.2456	0.789685	(0.08567976+0.1079549j)	-17.2135	0.137823	51.5623	0.899932	(0.09821367+0.1158985j)	-16.3679	0.151916	49.7217	0.867807	(0.1018733+0.09927727j)	-16.9392	0.142247	44.2606	0.772493	(0.1102165+0.1118817j)	-16.0792	0.157052	45.4296	0.792896	(0.09040942+0.1292564j)	-16.0413	0.157737	55.0288	0.960434	(0.07853424+0.1200203j)	-16.8671	0.143431	56.8016
5.117	(0.08391011+0.1014457j)	-17.6115	0.131652	50.4044	0.879722	(0.08435542+0.1235422j)	-16.5017	0.149594	55.6745	0.971703	(0.0951239+0.1125576j)	-16.6318	0.14737	49.7984	0.869146	(0.09631786+0.09864292j)	-17.2107	0.137868	45.6833	0.797323	(0.08767347+0.109194j)	-17.0752	0.140036	51.2385	0.894281	(0.09925012+0.1170351j)	-16.2805	0.153453	49.7008	0.867443	(0.1036218+0.1016923j)	-16.7615	0.145185	44.4616	0.776001	(0.1106522+0.1131435j)	-16.0127	0.158257	45.6378	0.79653	(0.09269806+0.1300089j)	-15.9354	0.159672	54.5106	0.95139	(0.07957104+0.1221886j)	-16.724	0.145814	56.9272
5.1175	(0.08493437+0.104429j)	-17.4186	0.134608	50.8778	0.887985	(0.08368467+0.1241231j)	-16.4956	0.149699	56.0119	0.977592	(0.09609761+0.1140993j)	-16.526	0.149176	49.895	0.870832	(0.09814598+0.1006733j)	-17.0404	0.140598	45.7283	0.798109	(0.08663342+0.1121511j)	-16.9717	0.141715	52.315	0.913068	(0.09993194+0.1199795j)	-16.1294	0.156146	50.2088	0.876309	(0.1039619+0.1037333j)	-16.6618	0.146863	44.9369	0.784298	(0.1117828+0.1166189j)	-15.8344	0.161541	46.213	0.806569	(0.09290221+0.1326507j)	-15.8125	0.161948	54.9944	0.959834	(0.07792028+0.1245947j)	-16.6564	0.146954	57.9786
5.118	(0.08545321+0.1053034j)	-17.3539	0.135614	50.9408	0.889085	(0.08624053+0.1253254j)	-16.3556	0.152131	55.4669	0.968079	(0.09752163+0.1144994j)	-16.455	0.150401	49.5782	0.865304	(0.09945196+0.1021512j)	-16.9196	0.142568	45.7671	0.798786	(0.09013174+0.1118702j)	-16.8532	0.143662	51.1423	0.892601	(0.1025384+0.120904j)	-15.9977	0.15853	49.6988	0.867408	(0.1072638+0.103568j)	-16.5302	0.149103	43.9957	0.76787	(0.1133775+0.1162897j)	-15.7876	0.162412	45.7265	0.798078	(0.09442083+0.1343212j)	-15.6932	0.164187	54.8948	0.958095	(0.0816299+0.1257906j)	-16.4807	0.149956	57.0191
5.1185	(0.08713494+0.1059427j)	-17.2546	0.137173	50.5636	0.882502	(0.08688902+0.1270753j)	-16.2529	0.153941	55.6372	0.971053	(0.09632462+0.1163496j)	-16.4177	0.151049	50.379	0.879279	(0.09860953+0.1030284j)	-16.9168	0.142614	46.2554	0.80731	(0.08914174+0.1133652j)	-16.8198	0.144215	51.8212	0.90445	(0.1030525+0.1203507j)	-16.0026	0.158443	49.4276	0.862674	(0.107017+0.1049049j)	-16.4864	0.149859	44.429	0.775432	(0.1125509+0.1168553j)	-15.7967	0.162243	46.0749	0.804159	(0.09593065+0.1353566j)	-15.6029	0.165904	54.6738	0.954238	(0.08215699+0.1266409j)	-16.423	0.150956	57.0269
5.119	(0.08841537+0.1063663j)	-17.1826	0.138315	50.2655	0.877298	(0.08742003+0.127698j)	-16.2071	0.154755	55.6051	0.970492	(0.09764793+0.1162425j)	-16.3738	0.151814	49.9685	0.872115	(0.09991829+0.1038893j)	-16.8242	0.144141	46.1162	0.80488	(0.09012461+0.1139761j)	-16.7545	0.145303	51.6654	0.901732	(0.1045962+0.1209055j)	-15.9246	0.15987	49.1367	0.857597	(0.1051925+0.1052146j)	-16.5491	0.14878	45.006	0.785503	(0.1144781+0.1159722j)	-15.7586	0.162956	45.3715	0.791881	(0.0959363+0.1347361j)	-15.6292	0.165401	54.5479	0.952041	(0.08332177+0.1286949j)	-16.2884	0.153313	57.0795
5.1195	(0.08726079+0.1082334j)	-17.1379	0.139028	51.1233	0.892269	(0.08780745+0.1302295j)	-16.0783	0.157066	56.0101	0.977561	(0.09903354+0.1173679j)	-16.274	0.153567	49.8428	0.86992	(0.09985093+0.1049454j)	-16.7812	0.144858	46.425	0.810269	(0.09061062+0.1161854j)	-16.6335	0.147341	52.0501	0.908445	(0.1039344+0.1225564j)	-15.88	0.160694	49.7003	0.867433	(0.1076891+0.1071969j)	-16.3661	0.151948	44.8688	0.783108	(0.1140507+0.1202569j)	-15.6115	0.165739	46.5173	0.811879	(0.09627293+0.1371261j)	-15.5173	0.167547	54.9282	0.958678	(0.08331405+0.1296401j)	-16.2438	0.154103	57.2729
5.12	(0.08780579+0.1082921j)	-17.1137	0.139417	50.964	0.88949	(0.08837073+0.1300873j)	-16.0674	0.157264	55.811	0.974086	(0.09927545+0.1193227j)	-16.181	0.155221	50.2398	0.876851	(0.1004707+0.1068664j)	-16.6726	0.146679	46.7668	0.816235	(0.08991009+0.1167928j)	-16.6305	0.147392	52.41	0.914727	(0.1041518+0.1233655j)	-15.8391	0.161452	49.8271	0.869648	(0.1073162+0.1078487j)	-16.3548	0.152145	45.1418	0.787873	(0.1143545+0.1196579j)	-15.6233	0.165514	46.2983	0.808057	(0.09578845+0.1378099j)	-15.5026	0.16783	55.1977	0.963382	(0.08268441+0.1305758j)	-16.2184	0.154553	57.6568
5.1205	(0.08570615+0.1116985j)	-17.0285	0.140791	52.501	0.916315	(0.08788166+0.1317481j)	-16.0066	0.158369	56.295	0.982533	(0.09909402+0.1204665j)	-16.1383	0.155987	50.5598	0.882435	(0.09857064+0.1080009j)	-16.6998	0.14622	47.6138	0.831018	(0.09064431+0.1183598j)	-16.5315	0.149082	52.5538	0.917236	(0.103459+0.1255537j)	-15.7729	0.162688	50.5107	0.881579	(0.1071687+0.1094514j)	-16.2958	0.153182	45.6037	0.795936	(0.1148398+0.1206061j)	-15.5699	0.166535	46.4029	0.809884	(0.09683968+0.1400815j)	-15.3759	0.170296	55.3435	0.965927	(0.0832716+0.132278j)	-16.1205	0.156306	57.8088
5.121	(0.08767816+0.1115514j)	-16.9613	0.141884	51.833	0.904657	(0.0879083+0.1316736j)	-16.0092	0.158322	56.272	0.982132	(0.09896977+0.1213249j)	-16.1057	0.156572	50.7944	0.88653	(0.09983158+0.1094896j)	-16.5848	0.14817	47.6417	0.831505	(0.09103616+0.1188905j)	-16.4932	0.149742	52.5582	0.917314	(0.1040224+0.1262352j)	-15.7258	0.163573	50.5102	0.88157	(0.1072189+0.1092551j)	-16.3018	0.153077	45.5389	0.794804	(0.1153387+0.121895j)	-15.5035	0.167814	46.583	0.813028	(0.09826583+0.140403j)	-15.3211	0.171374	55.0124	0.960148	(0.08460781+0.1330246j)	-16.046	0.157652	57.5424
5.1215	(0.08569617+0.1122447j)	-17.0022	0.141219	52.6391	0.918726	(0.0882251+0.1340238j)	-15.8929	0.160456	56.6439	0.988623	(0.09802254+0.1231824j)	-16.0586	0.157424	51.4889	0.898652	(0.09870017+0.1081049j)	-16.6901	0.146384	47.6038	0.830843	(0.09088008+0.1214105j)	-16.3828	0.151657	53.1838	0.928233	(0.1042264+0.1265801j)	-15.7048	0.163968	50.5319	0.881947	(0.1056989+0.1114888j)	-16.2705	0.153629	46.5271	0.81205	(0.1141078+0.1230028j)	-15.5052	0.16778	47.1484	0.822895	(0.09663261+0.14143j)	-15.3254	0.17129	55.657	0.971398	(0.0833601+0.1345141j)	-16.0131	0.15825	58.213
5.122	(0.08453108+0.1144417j)	-16.9374	0.142276	53.549	0.934606	(0.08696575+0.1348656j)	-15.8919	0.160474	57.1848	0.998062	(0.09588428+0.1230789j)	-16.1364	0.15602	52.0797	0.908963	(0.0961769+0.1106069j)	-16.6789	0.146574	48.9918	0.855068	(0.0885568+0.1223232j)	-16.4196	0.151014	54.0971	0.944172	(0.101305+0.1284767j)	-15.7237	0.163612	51.7439	0.903102	(0.1034774+0.1126491j)	-16.3083	0.152962	47.43	0.827809	(0.1134466+0.1230762j)	-15.5256	0.167385	47.3314	0.826089	(0.09473692+0.1420262j)	-15.3541	0.170724	56.2952	0.982536	(0.08179567+0.1352639j)	-16.0229	0.158072	58.8382
5.1225	(0.08527106+0.1144548j)	-16.9099	0.142727	53.3132	0.93049	(0.08574949+0.1350877j)	-15.9173	0.160005	57.5939	1.0052	(0.09690279+0.1222839j)	-16.1362	0.156024	51.6052	0.900681	(0.0960841+0.1119766j)	-16.6212	0.14755	49.368	0.861634	(0.08866438+0.1218804j)	-16.4366	0.150719	53.9652	0.941871	(0.1009971+0.1279867j)	-15.7543	0.163037	51.7223	0.902724	(0.1037858+0.1113389j)	-16.3511	0.15221	47.0108	0.820494	(0.1120419+0.1223826j)	-15.6018	0.165924	47.5257	0.829481	(0.09536175+0.1431145j)	-15.2907	0.171976	56.3232	0.983026	(0.08180316+0.1367j)	-15.9553	0.159307	59.1031
5.123	(0.08275654+0.1164617j)	-16.9012	0.14287	54.6028	0.952998	(0.08515932+0.1372917j)	-15.8334	0.161558	58.1895	1.0156	(0.09593974+0.1247783j)	-16.06	0.157398	52.444	0.91532	(0.09552336+0.1114329j)	-16.6671	0.146772	49.3959	0.862121	(0.0871039+0.1245556j)	-16.3637	0.151991	55.0342	0.960529	(0.1010937+0.1304463j)	-15.6485	0.165034	52.2249	0.911497	(0.102793+0.1151j)	-16.2316	0.154319	48.2327	0.84182	(0.112149+0.124152j)	-15.5298	0.167305	47.9079	0.83615	(0.0944889+0.1433304j)	-15.3059	0.171673	56.6056	0.987954	(0.08164468+0.1386683j)	-15.8679	0.160918	59.5114
5.1235	(0.08179633+0.1157537j)	-16.9703	0.141738	54.7534	0.955627	(0.08391934+0.1387224j)	-15.8027	0.162131	58.8284	1.02675	(0.09390576+0.1249008j)	-16.1228	0.156264	53.0626	0.926117	(0.09540459+0.1112888j)	-16.6782	0.146585	49.3945	0.862097	(0.08690932+0.122701j)	-16.4572	0.150362	54.69	0.95452	(0.1009601+0.1299605j)	-15.6731	0.164568	52.1581	0.91033	(0.1022887+0.1144147j)	-16.2794	0.153472	48.2027	0.841297	(0.1109+0.1236802j)	-15.5916	0.166119	48.1185	0.839826	(0.0950456+0.144324j)	-15.2487	0.172809	56.6328	0.988429	(0.08034422+0.1377965j)	-15.9443	0.159509	59.7551
5.124	(0.08129977+0.118634j)	-16.8437	0.143818	55.5772	0.970005	(0.08349031+0.1386088j)	-15.8198	0.161812	58.9376	1.02865	(0.09244273+0.1273958j)	-16.0598	0.157402	54.0341	0.943073	(0.09253005+0.1133155j)	-16.6954	0.146295	50.766	0.886033	(0.0846883+0.1249548j)	-16.4234	0.15095	55.8725	0.975159	(0.09837142+0.1297943j)	-15.7637	0.16286	52.8414	0.922257	(0.1007342+0.1148723j)	-16.3184	0.152784	48.7517	0.850878	(0.1087537+0.1259742j)	-15.5757	0.166424	49.1959	0.858631	(0.09329323+0.1448319j)	-15.2754	0.172279	57.2125	0.998546	(0.07967778+0.1400419j)	-15.8569	0.161122	60.362
5.1245	(0.07957128+0.1188298j)	-16.8926	0.143011	56.1928	0.980749	(0.08295337+0.1402326j)	-15.7599	0.162931	59.3939	1.03662	(0.09092797+0.1270254j)	-16.1255	0.156216	54.404	0.949528	(0.09093245+0.1148012j)	-16.6861	0.146451	51.6177	0.9009	(0.08293884+0.1257079j)	-16.4433	0.150603	56.5842	0.987581	(0.0971645+0.1320029j)	-15.708	0.163908	53.644	0.936265	(0.09917119+0.1164162j)	-16.3101	0.15293	49.5734	0.865219	(0.1079629+0.1263378j)	-15.5882	0.166184	49.4842	0.863662	(0.09164603+0.1465942j)	-15.2449	0.172884	57.9877	1.01208	(0.0784466+0.1411955j)	-15.8353	0.161524	60.944
5.125	(0.07858732+0.1189799j)	-16.9182	0.142591	56.5549	0.987069	(0.08105639+0.1395545j)	-15.8427	0.161386	59.851	1.0446	(0.09074994+0.1269901j)	-16.1329	0.156083	54.4496	0.950324	(0.09007749+0.1137462j)	-16.767	0.145094	51.6237	0.901004	(0.08316651+0.1271986j)	-16.3646	0.151974	56.8221	0.991732	(0.09587893+0.1309434j)	-15.794	0.162293	53.7878	0.938774	(0.09866402+0.1162436j)	-16.3363	0.15247	49.6764	0.867017	(0.1070809+0.1267911j)	-15.6	0.165959	49.8174	0.869477	(0.09270698+0.145982j)	-15.2425	0.172932	57.5821	1.005	(0.07812759+0.1403833j)	-15.8819	0.160659	60.9027
5.1255	(0.07596354+0.1192747j)	-16.9904	0.14141	57.5078	1.0037	(0.07959539+0.1387733j)	-15.9187	0.15998	60.163	1.05004	(0.08852302+0.127648j)	-16.1744	0.155339	55.259	0.964451	(0.08754946+0.1139247j)	-16.8521	0.143679	52.4583	0.915569	(0.08056525+0.1253534j)	-16.5356	0.149011	57.2709	0.999567	(0.09399596+0.1316111j)	-15.8242	0.16173	54.4658	0.950607	(0.09506948+0.1150675j)	-16.5211	0.149261	50.4363	0.880279	(0.1039538+0.1263773j)	-15.7223	0.163639	50.5604	0.882446	(0.08833089+0.1459412j)	-15.3609	0.170591	58.8156	1.02653	(0.07514501+0.1398646j)	-15.9845	0.158773	61.7522
5.126	(0.0757432+0.1186983j)	-17.0276	0.140806	57.4574	1.00282	(0.0776711+0.1382128j)	-15.9971	0.158542	60.6654	1.05881	(0.0875731+0.126111j)	-16.2758	0.153535	55.2234	0.96383	(0.08662431+0.1135338j)	-16.905	0.142806	52.657	0.919038	(0.07995698+0.1250845j)	-16.568	0.148456	57.4123	1.00203	(0.09279118+0.130534j)	-15.9092	0.160154	54.5926	0.95282	(0.09450994+0.1139372j)	-16.5928	0.148033	50.3246	0.87833	(0.1050249+0.1240087j)	-15.7826	0.162507	49.7382	0.868096	(0.08810566+0.1447799j)	-15.4176	0.169481	58.6774	1.02411	(0.07446834+0.1399869j)	-15.996	0.158562	61.9885
5.1265	(0.07298274+0.1195985j)	-17.0707	0.140108	58.6072	1.02289	(0.07658865+0.1404932j)	-15.9169	0.160013	61.4034	1.07169	(0.0851694+0.1261978j)	-16.3489	0.152249	55.9851	0.977124	(0.08459057+0.1135325j)	-16.9799	0.141581	53.311	0.930453	(0.07787547+0.1255698j)	-16.609	0.147758	58.1938	1.01567	(0.09028092+0.1309646j)	-15.9684	0.159067	55.4194	0.967251	(0.09107478+0.1140808j)	-16.7144	0.145976	51.3984	0.897071	(0.1013829+0.1259976j)	-15.8246	0.161722	51.1784	0.893232	(0.08701363+0.1460549j)	-15.3905	0.17001	59.2152	1.0335	(0.0721059+0.1404525j)	-16.0334	0.15788	62.8248
5.127	(0.07084578+0.1183236j)	-17.208	0.137912	59.0891	1.0313	(0.0746893+0.1385152j)	-16.0616	0.157369	61.6658	1.07627	(0.08290455+0.1254264j)	-16.458	0.150349	56.536	0.98674	(0.08228753+0.1118978j)	-17.1461	0.138897	53.6699	0.936717	(0.07559415+0.1240325j)	-16.7575	0.145253	58.6389	1.02344	(0.08958169+0.128882j)	-16.0844	0.156957	55.1981	0.963388	(0.09015369+0.1123418j)	-16.8302	0.144043	51.2531	0.894536	(0.09936994+0.1228118j)	-16.0281	0.157978	51.0229	0.890517	(0.0853751+0.1438155j)	-15.5328	0.167248	59.3048	1.03506	(0.07083721+0.1389766j)	-16.1381	0.155988	62.9918
5.1275	(0.06910183+0.1175826j)	-17.3047	0.136384	59.5578	1.03948	(0.07280034+0.1377392j)	-16.1489	0.155795	62.1419	1.08458	(0.08113428+0.1245652j)	-16.5562	0.148658	56.9222	0.99348	(0.07955296+0.1123321j)	-17.2246	0.137649	54.6941	0.954592	(0.07273787+0.1239643j)	-16.8491	0.143729	59.5971	1.04017	(0.08676866+0.1282557j)	-16.2018	0.154849	55.9205	0.975997	(0.08706197+0.1135512j)	-16.888	0.143086	52.5219	0.91668	(0.09678704+0.1227929j)	-16.118	0.156352	51.7543	0.903284	(0.08160846+0.1427468j)	-15.6805	0.164428	60.2434	1.05145	(0.06813625+0.1395068j)	-16.179	0.155257	63.9687
5.128	(0.06628873+0.1174672j)	-17.401	0.13488	60.5632	1.05703	(0.07242425+0.1368671j)	-16.2019	0.154848	62.1141	1.0841	(0.08031854+0.1251217j)	-16.5548	0.148683	57.3026	1.00012	(0.07834187+0.1100376j)	-17.3884	0.135077	54.5508	0.952092	(0.07201921+0.1241923j)	-16.8591	0.143564	59.8905	1.04529	(0.0846979+0.1286887j)	-16.2462	0.15406	56.6486	0.988705	(0.08640425+0.1116937j)	-17.0025	0.141213	52.2751	0.912373	(0.09517695+0.1224629j)	-16.1878	0.155099	52.146	0.910119	(0.08143652+0.1428536j)	-15.6801	0.164436	60.3138	1.05268	(0.06644974+0.1385843j)	-16.267	0.153692	64.3828
5.1285	(0.06538003+0.1164687j)	-17.4862	0.133565	60.6922	1.05928	(0.0703931+0.1369973j)	-16.2482	0.154024	62.8046	1.09615	(0.07893993+0.1228122j)	-16.7133	0.145994	57.2683	0.999521	(0.07774405+0.1096076j)	-17.4333	0.13438	54.6521	0.95386	(0.07051107+0.1222363j)	-17.0085	0.141115	60.0218	1.04758	(0.08427269+0.1262933j)	-16.3729	0.151828	56.2857	0.982371	(0.08501516+0.1092272j)	-17.1765	0.138413	52.1052	0.909407	(0.0945144+0.120165j)	-16.3129	0.152881	51.8136	0.904318	(0.08001161+0.1412865j)	-15.7899	0.162369	60.4768	1.05552	(0.06734389+0.1383142j)	-16.2587	0.153838	64.039
5.129	(0.0630429+0.1144659j)	-17.6759	0.130678	61.1559	1.06737	(0.06801637+0.1351208j)	-16.4047	0.151274	63.2805	1.10445	(0.07613438+0.1219505j)	-16.8469	0.143765	58.0232	1.0127	(0.0743698+0.1084787j)	-17.6199	0.131524	55.5666	0.96982	(0.06875426+0.1213941j)	-17.1078	0.139512	60.474	1.05547	(0.08346505+0.1257067j)	-16.4266	0.150893	56.4172	0.984665	(0.08212418+0.1073837j)	-17.3813	0.135187	52.5922	0.917907	(0.09313538+0.1186473j)	-16.4299	0.150836	51.8689	0.905283	(0.07844665+0.1417371j)	-15.8098	0.161998	61.037	1.0653	(0.06456383+0.1362133j)	-16.4354	0.15074	64.6395
5.1295	(0.06117121+0.1137448j)	-17.7781	0.12915	61.7289	1.07737	(0.06709336+0.1341475j)	-16.4787	0.14999	63.4282	1.10703	(0.07549982+0.1200593j)	-16.9649	0.141825	57.8361	1.00943	(0.07338264+0.1070029j)	-17.738	0.129748	55.5577	0.969664	(0.06807216+0.1208067j)	-17.1606	0.138665	60.5996	1.05766	(0.0807879+0.1234709j)	-16.6211	0.147553	56.803	0.991399	(0.08136879+0.1076388j)	-17.3976	0.134933	52.9128	0.923503	(0.09041571+0.1168841j)	-16.6081	0.147773	52.2763	0.912393	(0.07802549+0.1391628j)	-15.9424	0.159544	60.7216	1.05979	(0.06226605+0.1358586j)	-16.5102	0.149448	65.3773
5.13	(0.05794307+0.1110736j)	-18.0425	0.125279	62.4506	1.08997	(0.06453583+0.1306394j)	-16.7302	0.14571	63.7106	1.11196	(0.07245525+0.1172207j)	-17.2146	0.137806	58.2794	1.01717	(0.06991789+0.104985j)	-17.9832	0.126136	56.3372	0.983269	(0.06387325+0.1180919j)	-17.4411	0.134259	61.592	1.07498	(0.07799729+0.1220004j)	-16.7845	0.144802	57.4084	1.00197	(0.07721578+0.1050501j)	-17.6961	0.130376	53.6827	0.93694	(0.08858445+0.1141231j)	-16.8045	0.144469	52.1807	0.910726	(0.07526349+0.1352984j)	-16.2033	0.154823	60.9138	1.06315	(0.06021415+0.1325408j)	-16.7381	0.145577	65.5674
5.1305	(0.05718734+0.1101613j)	-18.1231	0.124121	62.5651	1.09197	(0.06279409+0.1280296j)	-16.9176	0.1426	63.8736	1.11481	(0.07156999+0.1157786j)	-17.322	0.136114	58.2772	1.01713	(0.06831048+0.1029928j)	-18.1605	0.123587	56.4455	0.985159	(0.06229931+0.1148486j)	-17.6773	0.130658	61.5225	1.07377	(0.07703264+0.1186793j)	-16.9856	0.141488	57.0131	0.995066	(0.07635839+0.1036384j)	-17.8064	0.12873	53.6181	0.935812	(0.08700592+0.1124843j)	-16.9416	0.142207	52.2783	0.912428	(0.0737386+0.1358691j)	-16.2164	0.154589	61.5105	1.07356	(0.05848088+0.1306585j)	-16.8842	0.143149	65.8874
5.131	(0.05572019+0.1088785j)	-18.2509	0.122308	62.8982	1.09778	(0.06084237+0.1261931j)	-17.0716	0.140095	64.2596	1.12154	(0.06794129+0.1144152j)	-17.5186	0.133067	59.2976	1.03494	(0.06558897+0.1013436j)	-18.3647	0.120716	57.0893	0.996396	(0.06110151+0.1141116j)	-17.7586	0.129441	61.833	1.07919	(0.07573919+0.1173532j)	-17.0978	0.139672	57.162	0.997665	(0.07517982+0.1002842j)	-18.0385	0.125335	53.1423	0.927508	(0.08487877+0.1100088j)	-17.143	0.138947	52.3475	0.913637	(0.07136368+0.132659j)	-16.4414	0.150636	61.722	1.07725	(0.05760702+0.1293934j)	-16.9764	0.141638	66.001
5.1315	(0.05236402+0.1056561j)	-18.5682	0.11792	63.6366	1.11067	(0.05818857+0.1246454j)	-17.2302	0.137559	64.9753	1.13403	(0.06626874+0.1113827j)	-17.7475	0.129606	59.2489	1.03409	(0.06414723+0.09792242j)	-18.6316	0.117063	56.7719	0.990857	(0.05832011+0.1120808j)	-17.9688	0.126346	62.5102	1.09101	(0.07259414+0.1143677j)	-17.3637	0.135462	57.5949	1.00522	(0.07229663+0.09830301j)	-18.271	0.122026	53.6675	0.936675	(0.08265186+0.1082229j)	-17.3181	0.136175	52.6303	0.918573	(0.06886757+0.1304805j)	-16.6218	0.147539	62.1749	1.08516	(0.05501913+0.1272865j)	-17.1604	0.138669	66.6238
5.132	(0.05286068+0.1031586j)	-18.7173	0.115914	62.8684	1.09726	(0.05970556+0.121132j)	-17.3903	0.135047	63.7615	1.11285	(0.06674815+0.1080505j)	-17.9236	0.127005	58.2943	1.01743	(0.06342749+0.09514476j)	-18.8354	0.114348	56.3109	0.982811	(0.05767561+0.1082401j)	-18.2268	0.122647	61.9491	1.08122	(0.07339768+0.1107427j)	-17.5323	0.132858	56.4645	0.985492	(0.07237727+0.09592468j)	-18.4043	0.120167	52.9646	0.924407	(0.08235839+0.1050208j)	-17.4928	0.133463	51.8961	0.905758	(0.07028586+0.1275939j)	-16.7325	0.145672	61.1516	1.0673	(0.05591454+0.1245192j)	-17.2975	0.136497	65.8178
5.1325	(0.05037598+0.1005923j)	-18.9768	0.112501	63.3986	1.10651	(0.05707463+0.1177393j)	-17.6649	0.130844	64.138	1.11942	(0.06442668+0.1059496j)	-18.1315	0.124	58.6967	1.02445	(0.06091971+0.09290165j)	-19.0862	0.111094	56.7454	0.990394	(0.05618302+0.1068395j)	-18.365	0.120711	62.2617	1.08667	(0.06998008+0.1083512j)	-17.7892	0.128985	57.1431	0.997335	(0.06853905+0.09286597j)	-18.7544	0.11542	53.5711	0.934992	(0.08006863+0.1017678j)	-17.7553	0.12949	51.8051	0.90417	(0.06683743+0.125147j)	-16.9618	0.141877	61.8946	1.08026	(0.05341756+0.1211605j)	-17.5614	0.132413	66.2082
5.133	(0.04991617+0.09794861j)	-19.1773	0.109934	62.9959	1.09949	(0.05628064+0.115557j)	-17.8197	0.128534	64.0322	1.11757	(0.06287745+0.1034423j)	-18.3405	0.121053	58.7067	1.02462	(0.06034023+0.09036206j)	-19.2789	0.108657	56.2666	0.982037	(0.05435384+0.1034221j)	-18.6485	0.116835	62.2757	1.08692	(0.07016467+0.1049066j)	-17.9783	0.126208	56.2242	0.981298	(0.06740221+0.08987057j)	-18.9895	0.112338	53.1304	0.9273	(0.07952941+0.09797599j)	-17.9794	0.126191	50.933	0.888948	(0.06749568+0.1204389j)	-17.1985	0.138062	60.7331	1.05999	(0.05317559+0.1182826j)	-17.7421	0.129686	65.793
5.1335	(0.04831478+0.09496121j)	-19.4493	0.106546	63.0337	1.10015	(0.05566744+0.1126379j)	-18.0172	0.125643	63.7007	1.11179	(0.06167765+0.1009172j)	-18.5423	0.118273	58.5679	1.0222	(0.06017692+0.08895134j)	-19.3804	0.107395	55.9211	0.976007	(0.05582729+0.1011473j)	-18.746	0.115531	61.1039	1.06646	(0.06929253+0.1035919j)	-18.0875	0.12463	56.2215	0.98125	(0.06647447+0.08781445j)	-19.1613	0.110137	52.8747	0.922838	(0.07841022+0.09615668j)	-18.1264	0.124074	50.8047	0.88671	(0.06655134+0.1189981j)	-17.3073	0.136344	60.7833	1.06087	(0.05090905+0.1164993j)	-17.9146	0.127137	66.3951
5.134	(0.04845972+0.0925815j)	-19.6179	0.104497	62.3712	1.08858	(0.05484728+0.1099432j)	-18.2115	0.122865	63.4868	1.10805	(0.06085988+0.09770665j)	-18.7777	0.115111	58.0819	1.01372	(0.05774464+0.08440332j)	-19.8054	0.102266	55.622	0.970786	(0.05336156+0.09799305j)	-19.0483	0.11158	61.4297	1.07215	(0.06791403+0.09933434j)	-18.3924	0.120331	55.6399	0.9711	(0.06647412+0.0841864j)	-19.3907	0.107267	51.7052	0.902425	(0.0772659+0.09234387j)	-18.3871	0.120405	50.0801	0.874063	(0.06603073+0.1146686j)	-17.5674	0.132321	60.065	1.04833	(0.05103648+0.1141018j)	-18.0621	0.124996	65.9016
5.1345	(0.04668872+0.08914487j)	-19.9453	0.100631	62.3572	1.08834	(0.05431728+0.1071784j)	-18.4051	0.120156	63.1244	1.10173	(0.06087935+0.09521557j)	-18.9373	0.113015	57.4058	1.00192	(0.05787181+0.08221406j)	-19.9532	0.10054	54.8577	0.957447	(0.05328609+0.09614138j)	-19.1784	0.109921	61.0027	1.0647	(0.06728832+0.0966251j)	-18.5811	0.117746	55.1472	0.9625	(0.06576195+0.08103084j)	-19.6295	0.104358	50.9384	0.889042	(0.07665507+0.08947922j)	-18.5753	0.117824	49.414	0.862437	(0.06588724+0.1123431j)	-17.7052	0.130239	59.6091	1.04038	(0.05126649+0.1101158j)	-18.311	0.121465	65.0348
5.135	(0.04658923+0.08784449j)	-20.0493	0.0994345	62.0603	1.08316	(0.05357163+0.1035873j)	-18.6645	0.11662	62.6536	1.09351	(0.0606275+0.09155967j)	-19.1869	0.109813	56.4889	0.985918	(0.0577762+0.07936731j)	-20.1605	0.0981695	53.9469	0.941551	(0.0539373+0.09281413j)	-19.3841	0.107348	59.8377	1.04437	(0.0670459+0.09316143j)	-18.8028	0.114779	54.2584	0.946988	(0.06520097+0.07781202j)	-19.8692	0.101518	50.0394	0.873352	(0.07529027+0.08616786j)	-18.8294	0.114427	48.8542	0.852667	(0.06608067+0.1098956j)	-17.84	0.128233	58.9813	1.02942	(0.05063913+0.1083383j)	-18.4462	0.119589	64.9478
5.1355	(0.04636996+0.08315247j)	-20.4266	0.0952077	60.8538	1.0621	(0.05515259+0.1011987j)	-18.767	0.115252	61.4099	1.07181	(0.06201692+0.08807635j)	-19.3541	0.10772	54.8496	0.957306	(0.05821268+0.07467116j)	-20.4747	0.094681	52.0605	0.908627	(0.05364835+0.08946111j)	-19.6331	0.104314	59.0496	1.03061	(0.06738233+0.09026787j)	-18.9658	0.112644	53.2597	0.929558	(0.06480972+0.07452558j)	-20.108	0.0987642	48.9888	0.855016	(0.07634323+0.08239074j)	-18.9906	0.112323	47.1818	0.823478	(0.06663118+0.1060865j)	-18.0426	0.125276	57.8677	1.00998	(0.05187606+0.1043041j)	-18.6741	0.116492	63.5564
5.136	(0.046898+0.07857999j)	-20.7705	0.0915109	59.1705	1.03272	(0.0539763+0.09741418j)	-19.0647	0.111369	61.0096	1.06482	(0.06187319+0.0834877j)	-19.6664	0.103916	53.4577	0.933012	(0.05761617+0.07098157j)	-20.779	0.0914221	50.9336	0.888958	(0.05313839+0.08484095j)	-19.9906	0.100108	57.9399	1.01124	(0.06764179+0.08571856j)	-19.2361	0.109193	51.7225	0.902728	(0.06539661+0.06989764j)	-20.3799	0.0957204	46.9054	0.818654	(0.07672273+0.07767633j)	-19.2372	0.109179	45.3539	0.791574	(0.0665993+0.1022589j)	-18.2704	0.122034	56.9246	0.993521	(0.05176582+0.09967308j)	-18.9913	0.112314	62.5546
5.1365	(0.04589158+0.07737818j)	-20.9187	0.0899634	59.3286	1.03548	(0.05392557+0.09390972j)	-19.3081	0.108291	60.1344	1.04954	(0.0612802+0.08112557j)	-19.8562	0.101669	52.9335	0.923864	(0.05652178+0.06836708j)	-21.0409	0.0887061	50.4181	0.879962	(0.05301886+0.08211378j)	-20.1983	0.0977429	57.1507	0.997467	(0.06677177+0.08216798j)	-19.5039	0.105878	50.9018	0.888404	(0.06376117+0.06771985j)	-20.6291	0.0930133	46.7246	0.815497	(0.07640629+0.07484164j)	-19.416	0.106954	44.4073	0.775054	(0.0653918+0.09781778j)	-18.5873	0.117662	56.237	0.981521	(0.05171616+0.09721421j)	-19.1631	0.110114	61.9878
5.137	(0.0462909+0.07473076j)	-21.1196	0.0879064	58.2244	1.01621	(0.05536845+0.09210962j)	-19.3742	0.10747	58.9893	1.02956	(0.06203322+0.07793827j)	-20.0338	0.0996117	51.4827	0.898543	(0.05640625+0.066672j)	-21.1766	0.0873317	49.7679	0.868614	(0.05301102+0.08041236j)	-20.3262	0.0963136	56.6055	0.987953	(0.06812682+0.0810526j)	-19.5036	0.105881	49.9521	0.871828	(0.06404886+0.06427164j)	-20.8444	0.0907364	45.0995	0.787134	(0.07778263+0.07214855j)	-19.4863	0.106092	42.848	0.747838	(0.06773642+0.09633385j)	-18.5797	0.117764	54.8873	0.957964	(0.05185086+0.09509972j)	-19.3061	0.108317	61.3996
5.1375	(0.04681512+0.07017408j)	-21.4776	0.0843567	56.2916	0.982474	(0.0551183+0.08744217j)	-19.7126	0.103364	57.7751	1.00837	(0.06139341+0.07422282j)	-20.3254	0.0963233	50.4041	0.879718	(0.0570536+0.06261676j)	-21.4412	0.0847111	47.6616	0.831852	(0.05414252+0.0761626j)	-20.5888	0.093446	54.5917	0.952805	(0.06858904+0.07572335j)	-19.8136	0.102169	47.8302	0.834795	(0.06506572+0.06009808j)	-21.0539	0.0885739	42.7272	0.74573	(0.07701042+0.06837043j)	-19.7448	0.102981	41.5989	0.726038	(0.06772359+0.09152464j)	-18.8729	0.113856	53.5004	0.933759	(0.0524623+0.09123915j)	-19.5558	0.105247	60.1012
5.138	(0.04834417+0.06717268j)	-21.6435	0.0827607	54.2574	0.946971	(0.0577701+0.08328211j)	-19.8829	0.101357	55.2522	0.964333	(0.0632092+0.06997853j)	-20.5098	0.0942995	47.9096	0.83618	(0.05867915+0.05880902j)	-21.6104	0.0830767	45.0633	0.786504	(0.05558807+0.07224613j)	-20.8042	0.0911567	52.4244	0.914978	(0.06973656+0.07207514j)	-19.9749	0.10029	45.9448	0.801887	(0.06612039+0.05761143j)	-21.1402	0.0876982	41.066	0.716737	(0.07819265+0.06431969j)	-19.8923	0.101248	39.44	0.688358	(0.06916376+0.0886034j)	-18.9845	0.112402	52.0244	0.907997	(0.05436938+0.08668226j)	-19.8006	0.102322	57.903
5.1385	(0.04838636+0.06413825j)	-21.9011	0.0803427	52.9688	0.924481	(0.05788597+0.08171808j)	-19.9876	0.100143	54.6877	0.95448	(0.0640142+0.0680331j)	-20.5917	0.0934148	46.7433	0.815824	(0.05874195+0.05598271j)	-21.8147	0.081146	43.6222	0.761352	(0.05722389+0.07013857j)	-20.865	0.0905207	50.7901	0.886454	(0.06998745+0.0695183j)	-20.1184	0.098646	44.8073	0.782035	(0.06646587+0.05358528j)	-21.3733	0.0853762	38.876	0.678515	(0.07887007+0.0611403j)	-20.018	0.0997929	37.7829	0.659437	(0.07023555+0.08660129j)	-19.0543	0.111503	50.9572	0.889371	(0.05564806+0.0847278j)	-19.882	0.101368	56.7036
5.139	(0.05021005+0.06289297j)	-21.8865	0.0804772	51.3982	0.897068	(0.05892919+0.07847389j)	-20.1634	0.0981366	53.0956	0.926694	(0.06560069+0.06542259j)	-20.6633	0.0926475	44.9221	0.784039	(0.06056813+0.0533564j)	-21.8606	0.0807181	41.3779	0.72218	(0.0571672+0.06736429j)	-21.0757	0.0883518	49.6811	0.8671	(0.07135579+0.06734719j)	-20.165	0.0981188	43.3446	0.756506	(0.06842482+0.05095155j)	-21.3799	0.0853113	36.6727	0.640059	(0.08012459+0.05922635j)	-20.0315	0.0996379	36.471	0.636539	(0.07188074+0.0825224j)	-19.2166	0.109439	48.9427	0.854211	(0.05696898+0.08156101j)	-20.0447	0.099487	55.0664
5.1395	(0.05248019+0.05879558j)	-22.0683	0.0788105	48.2483	0.842092	(0.06053758+0.075008j)	-20.3194	0.0963898	51.0936	0.891752	(0.06644181+0.0617702j)	-20.846	0.0907197	42.9133	0.748978	(0.0622238+0.04963459j)	-21.9823	0.0795952	38.5786	0.673324	(0.05932474+0.06329988j)	-21.2342	0.0867542	46.8567	0.817804	(0.07415504+0.06264711j)	-20.2578	0.0970754	40.1915	0.701475	(0.06898296+0.04644414j)	-21.6016	0.0831607	33.9512	0.59256	(0.0819854+0.05478715j)	-20.1219	0.0986065	33.753	0.589101	(0.07345243+0.07865782j)	-19.362	0.107621	46.96	0.819606	(0.05858026+0.07877377j)	-20.1606	0.098168	53.3636
5.14	(0.05351961+0.05669103j)	-22.1622	0.0779629	46.6483	0.814166	(0.06311627+0.07287643j)	-20.3177	0.0964087	49.1051	0.857045	(0.06877717+0.05990842j)	-20.7991	0.0912103	41.0575	0.716589	(0.0634584+0.0460759j)	-22.1113	0.0784217	35.9827	0.628016	(0.0611766+0.06129961j)	-21.2493	0.0866038	45.0575	0.786403	(0.07502764+0.06080535j)	-20.3028	0.0965735	39.0227	0.681074	(0.07143842+0.04481353j)	-21.4803	0.0843309	32.1002	0.560254	(0.08414904+0.05249444j)	-20.0715	0.0991803	31.957	0.557755	(0.07575192+0.07639858j)	-19.3648	0.107588	45.2435	0.789648	(0.0610008+0.07612951j)	-20.2151	0.0975541	51.2956
5.1405	(0.05584635+0.05434636j)	-22.1664	0.0779252	44.2201	0.771787	(0.06523663+0.06996775j)	-20.3852	0.0956624	47.0041	0.820376	(0.07044539+0.05602529j)	-20.9144	0.0900077	38.4953	0.671869	(0.0650284+0.04422023j)	-22.0872	0.0786392	34.2163	0.597186	(0.06273869+0.05857836j)	-21.3268	0.0858345	43.0359	0.751119	(0.07779355+0.05718495j)	-20.3049	0.0965503	36.3191	0.633888	(0.07268272+0.04238309j)	-21.5002	0.0841374	30.2475	0.527919	(0.08520945+0.048903j)	-20.1538	0.0982454	29.8522	0.521019	(0.07798044+0.07333858j)	-19.4083	0.107049	43.2429	0.754732	(0.06193787+0.07358838j)	-20.3379	0.096185	49.9134
5.141	(0.05667925+0.05111767j)	-22.3466	0.0763253	42.0466	0.733851	(0.06649963+0.06683028j)	-20.5117	0.0942788	45.1421	0.787878	(0.07110693+0.0535168j)	-21.0126	0.0889957	36.966	0.645179	(0.06477102+0.04157107j)	-22.2743	0.0769639	32.693	0.5706	(0.0634186+0.05569014j)	-21.4732	0.0843997	41.2875	0.720603	(0.07941022+0.05558876j)	-20.2705	0.0969334	34.9928	0.61074	(0.07398496+0.03873704j)	-21.565	0.0835125	27.6357	0.482333	(0.08648835+0.04550382j)	-20.1996	0.0977284	27.7501	0.48433	(0.07892949+0.07003125j)	-19.5334	0.105519	41.5815	0.725734	(0.06352689+0.07120014j)	-20.4071	0.0954208	48.2597
5.1415	(0.05965149+0.04868418j)	-22.2706	0.0769964	39.2194	0.684507	(0.06902435+0.06441708j)	-20.4993	0.0944136	43.0226	0.750885	(0.0740133+0.05057466j)	-20.9497	0.0896424	34.3455	0.599442	(0.06850766+0.03763965j)	-22.1396	0.0781668	28.7854	0.5024	(0.06612435+0.05283861j)	-21.4482	0.0846425	38.6276	0.674179	(0.08125748+0.05256094j)	-20.2847	0.0967752	32.8966	0.574154	(0.07565934+0.03580604j)	-21.545	0.0837043	25.326	0.442022	(0.08924048+0.0430867j)	-20.0787	0.0990976	25.772	0.449806	(0.08166622+0.06809089j)	-19.467	0.106328	39.8204	0.694996	(0.06712181+0.06776031j)	-20.4111	0.0953771	45.2712
5.142	(0.06194166+0.04686653j)	-22.1945	0.0776739	37.112	0.647727	(0.07302307+0.06326703j)	-20.2988	0.0966182	40.9056	0.713937	(0.07699097+0.04850231j)	-20.8197	0.090995	32.2099	0.562168	(0.07100514+0.03753261j)	-21.9041	0.0803145	27.8605	0.486257	(0.06936774+0.05133171j)	-21.2803	0.086295	36.5012	0.637066	(0.08404388+0.05073398j)	-20.1604	0.0981698	31.1177	0.543107	(0.07840792+0.03527584j)	-21.3123	0.0859778	24.2231	0.422772	(0.09184578+0.04009624j)	-19.9812	0.100217	23.5842	0.411622	(0.08449668+0.06649231j)	-19.3701	0.107522	38.2	0.666716	(0.06953346+0.06658935j)	-20.3297	0.0962759	43.761
5.1425	(0.06448884+0.04542835j)	-22.0603	0.0788831	35.1623	0.613698	(0.07483406+0.06136159j)	-20.2847	0.0967749	39.3507	0.686799	(0.0790325+0.04713478j)	-20.7223	0.0920208	30.8117	0.537766	(0.07353275+0.03545992j)	-21.7623	0.0816362	25.7449	0.449333	(0.07150088+0.04955094j)	-21.2104	0.0869924	34.7224	0.60602	(0.08571462+0.04781679j)	-20.1622	0.0981501	29.1554	0.508858	(0.08067037+0.03281869j)	-21.2006	0.0870906	22.1377	0.386376	(0.09301632+0.0389063j)	-19.9286	0.100825	22.6983	0.39616	(0.08778639+0.0639894j)	-19.2808	0.108633	36.0891	0.629874	(0.07266405+0.06417431j)	-20.2695	0.0969454	41.4498
5.143	(0.06679977+0.04238336j)	-22.0353	0.0791111	32.3945	0.56539	(0.07752047+0.05898966j)	-20.2277	0.0974125	37.2695	0.650476	(0.08245394+0.04437658j)	-20.571	0.0936372	28.2891	0.493737	(0.07561767+0.03203894j)	-21.7105	0.0821251	22.9622	0.400766	(0.07479789+0.04662546j)	-21.0965	0.08814	31.9375	0.557414	(0.08863194+0.04514456j)	-20.0464	0.0994668	26.992	0.471099	(0.08375484+0.02948201j)	-21.0325	0.0887922	19.3923	0.338459	(0.09738996+0.03636198j)	-19.6629	0.103957	20.4739	0.357336	(0.09035504+0.06155306j)	-19.2253	0.109329	34.2641	0.598021	(0.07541878+0.0620362j)	-20.2061	0.0976549	39.4392
5.1435	(0.06977677+0.04155525j)	-21.8074	0.0812135	30.7757	0.537138	(0.08030406+0.05678259j)	-20.1444	0.0983514	35.2639	0.615472	(0.08519343+0.04159479j)	-20.4633	0.0948053	26.0235	0.454195	(0.0787543+0.03118656j)	-21.4419	0.0847044	21.6035	0.377052	(0.07591768+0.0454954j)	-21.0605	0.0885061	30.9331	0.539885	(0.09106062+0.04277619j)	-19.9474	0.100607	25.162	0.43916	(0.08536872+0.02770677j)	-20.9391	0.0897523	17.9811	0.313829	(0.0980624+0.03332816j)	-19.6952	0.103571	18.7712	0.327619	(0.09324514+0.05924444j)	-19.1348	0.110474	32.4303	0.566016	(0.07803494+0.05978935j)	-20.1483	0.0983068	37.4589
5.144	(0.07257734+0.04104739j)	-21.5787	0.0833808	29.4911	0.514717	(0.08306585+0.0559006j)	-19.9892	0.100124	33.9393	0.592352	(0.08747276+0.04205036j)	-20.2596	0.0970552	25.6748	0.448109	(0.08019149+0.03041404j)	-21.3338	0.0857653	20.7701	0.362507	(0.07838662+0.04407237j)	-20.9222	0.0899268	29.3466	0.512195	(0.09432298+0.04327666j)	-19.678	0.103777	24.6463	0.430159	(0.08738076+0.02754162j)	-20.7603	0.0916184	17.4944	0.305334	(0.1006913+0.03271307j)	-19.5044	0.105872	17.9982	0.314128	(0.09493653+0.05864366j)	-19.0476	0.111589	31.7042	0.553343	(0.08060418+0.05878751j)	-20.0205	0.0997647	36.1046
5.1445	(0.0737557+0.03955463j)	-21.5462	0.0836927	28.2043	0.492258	(0.08649804+0.05446556j)	-19.8095	0.102217	32.1976	0.561953	(0.08926404+0.03994119j)	-20.1939	0.0977925	24.1061	0.420731	(0.08309555+0.02830634j)	-21.1316	0.0877845	18.8113	0.328319	(0.08126985+0.0432775j)	-20.7172	0.0920746	28.036	0.489321	(0.09644598+0.04173004j)	-19.569	0.105087	23.3971	0.408356	(0.08999737+0.02553546j)	-20.5791	0.0935499	15.8405	0.276469	(0.1041055+0.03198991j)	-19.2587	0.10891	17.0813	0.298126	(0.09991715+0.0575483j)	-18.763	0.115305	29.9402	0.522556	(0.08389517+0.05756328j)	-19.8498	0.101744	34.4553
5.145	(0.07751894+0.03892821j)	-21.2352	0.0867444	26.6647	0.465387	(0.08752178+0.05173064j)	-19.8564	0.101667	30.5856	0.53382	(0.09152881+0.03813292j)	-20.0737	0.0991546	22.6177	0.394753	(0.08571723+0.02761004j)	-20.9099	0.0900542	17.8541	0.311612	(0.08427466+0.04044378j)	-20.5859	0.0934768	25.6366	0.447442	(0.09878163+0.0389318j)	-19.4794	0.106177	21.5104	0.375427	(0.09365518+0.02401077j)	-20.2929	0.0966841	14.3795	0.250969	(0.1057835+0.02992099j)	-19.1774	0.109934	15.7936	0.275651	(0.1018433+0.05456594j)	-18.7454	0.11554	28.1817	0.491863	(0.08601911+0.05623575j)	-19.7626	0.10277	33.175
5.1455	(0.0800145+0.03685956j)	-21.1009	0.0880962	24.7337	0.431684	(0.09106532+0.05267368j)	-19.5595	0.105202	30.0458	0.524398	(0.09442826+0.03724874j)	-19.8699	0.101509	21.5275	0.375727	(0.08739259+0.02633437j)	-20.793	0.0912741	16.7693	0.29268	(0.08703092+0.0417558j)	-20.3068	0.0965294	25.6308	0.447342	(0.1016822+0.03838614j)	-19.2765	0.108687	20.6821	0.36097	(0.09421608+0.02389165j)	-20.2468	0.0971982	14.2293	0.248349	(0.1088032+0.02909302j)	-18.9673	0.112626	14.9702	0.261279	(0.104006+0.05360219j)	-18.6358	0.117006	27.2655	0.475873	(0.08957127+0.05529984j)	-19.5542	0.105267	31.6905
5.146	(0.08178478+0.03643466j)	-20.9603	0.0895334	24.0127	0.419101	(0.09302274+0.05177837j)	-19.4561	0.106462	29.1012	0.507912	(0.09744224+0.03786213j)	-19.6144	0.10454	21.2341	0.370605	(0.08926117+0.02668092j)	-20.6151	0.0931634	16.6419	0.290455	(0.09021111+0.04093947j)	-20.0815	0.0990661	24.4094	0.426025	(0.1032217+0.03846601j)	-19.1598	0.110156	20.4381	0.356713	(0.09645847+0.02414348j)	-20.0493	0.0994341	14.0524	0.24526	(0.1109863+0.02844107j)	-18.8184	0.114572	14.3732	0.250859	(0.1067309+0.05404498j)	-18.4429	0.119634	26.8561	0.468728	(0.09155931+0.05574175j)	-19.3967	0.107193	31.3333
5.1465	(0.0857975+0.03637502j)	-20.6126	0.0931899	22.9752	0.400993	(0.09768819+0.0510067j)	-19.1561	0.110203	27.5708	0.481201	(0.09986475+0.03770836j)	-19.4329	0.106747	20.6863	0.361043	(0.09297983+0.02633434j)	-20.2971	0.0966372	15.8135	0.275998	(0.09253558+0.04134101j)	-19.8835	0.10135	24.0731	0.420155	(0.1063064+0.03736184j)	-18.963	0.112681	19.3642	0.33797	(0.09999356+0.02285755j)	-19.7794	0.102573	12.876	0.224729	(0.1135678+0.02743494j)	-18.6486	0.116835	13.5809	0.237032	(0.1100044+0.05441635j)	-18.2211	0.122728	26.3204	0.459378	(0.095575+0.05471184j)	-19.1621	0.110127	29.7889
5.147	(0.08819064+0.03657416j)	-20.4023	0.0954739	22.5246	0.393129	(0.0994284+0.05106275j)	-19.0332	0.111774	27.1834	0.474439	(0.1030824+0.03696676j)	-19.2109	0.10951	19.7285	0.344328	(0.09591653+0.02535641j)	-20.0688	0.0992115	14.8079	0.258447	(0.09459277+0.03953212j)	-19.7837	0.102521	22.681	0.395858	(0.1089255+0.03634497j)	-18.799	0.114829	18.4522	0.322052	(0.1030014+0.02213751j)	-19.547	0.105353	12.1297	0.211704	(0.1153493+0.02662413j)	-18.5343	0.118382	12.997	0.226841	(0.1133176+0.05283631j)	-18.0597	0.12503	24.9981	0.436299	(0.09742201+0.05488034j)	-19.0299	0.111816	29.3937
5.1475	(0.08909731+0.03723111j)	-20.3038	0.0965634	22.6786	0.395816	(0.1020687+0.05105696j)	-18.8523	0.114126	26.5752	0.463825	(0.1043347+0.03677744j)	-19.1228	0.110627	19.4173	0.338896	(0.09658724+0.02624668j)	-19.9922	0.10009	15.2025	0.265334	(0.09723205+0.04052019j)	-19.5484	0.105337	22.6233	0.394851	(0.1120653+0.03759424j)	-18.5474	0.118203	18.5449	0.32367	(0.1041504+0.02233312j)	-19.4515	0.106518	12.1027	0.211233	(0.1181226+0.02731197j)	-18.3272	0.121239	13.019	0.227224	(0.1147677+0.05262737j)	-17.9748	0.126259	24.6341	0.429946	(0.1005291+0.05470145j)	-18.8278	0.114448	28.5522
5.148	(0.09337132+0.03774158j)	-19.9385	0.100711	22.009	0.38413	(0.1036735+0.05138921j)	-18.7325	0.115711	26.3668	0.460188	(0.1081066+0.03667526j)	-18.8499	0.114158	18.7396	0.327067	(0.1009513+0.02675708j)	-19.6229	0.104437	14.8449	0.259092	(0.100504+0.04037657j)	-19.3065	0.108311	21.8873	0.382006	(0.1150468+0.03767145j)	-18.3402	0.121057	18.1308	0.316441	(0.107333+0.02284845j)	-19.1929	0.109738	12.0174	0.209744	(0.1210252+0.02797791j)	-18.1164	0.124217	13.0166	0.227183	(0.1186707+0.0529975j)	-17.7233	0.129967	24.0652	0.420017	(0.1038396+0.05567254j)	-18.5755	0.117822	28.1975
5.1485	(0.0947413+0.03784632j)	-19.8262	0.102021	21.7752	0.38005	(0.1078429+0.05212739j)	-18.4323	0.11978	25.7975	0.450251	(0.1095985+0.03737853j)	-18.726	0.115797	18.8319	0.328679	(0.1028776+0.0260581j)	-19.4835	0.106126	14.2136	0.248075	(0.1031474+0.04061372j)	-19.1049	0.110855	21.4918	0.375102	(0.1174946+0.03643272j)	-18.2009	0.123014	17.2276	0.300679	(0.1098479+0.02208519j)	-19.0121	0.112046	11.3679	0.198407	(0.1234781+0.02702761j)	-17.965	0.126401	12.3465	0.215487	(0.1201403+0.05322427j)	-17.628	0.131402	23.8942	0.417032	(0.1059816+0.05513304j)	-18.4552	0.119464	27.4841
5.149	(0.09828261+0.03836973j)	-19.5344	0.105507	21.3258	0.372205	(0.1103178+0.05180242j)	-18.2817	0.121875	25.1536	0.439012	(0.1117605+0.03751378j)	-18.5706	0.117888	18.555	0.323845	(0.1046468+0.02699047j)	-19.3258	0.108071	14.4625	0.252418	(0.1055574+0.04136288j)	-18.9099	0.113372	21.3978	0.373463	(0.1194041+0.03887554j)	-18.0221	0.125573	18.0342	0.314756	(0.1117207+0.02399187j)	-18.8415	0.114268	12.1201	0.211536	(0.1250778+0.02820083j)	-17.841	0.128218	12.7058	0.221758	(0.1235663+0.05402323j)	-17.4024	0.13486	23.615	0.412159	(0.1087915+0.05636818j)	-18.2353	0.122527	27.39
5.1495	(0.09992109+0.03967208j)	-19.3711	0.107509	21.6548	0.377947	(0.1127191+0.05364602j)	-18.0734	0.124834	25.451	0.444204	(0.1147141+0.03871109j)	-18.3393	0.12107	18.6473	0.325457	(0.1067001+0.02892849j)	-19.1287	0.110552	15.1693	0.264755	(0.1072496+0.04278893j)	-18.7506	0.11547	21.7503	0.379615	(0.1218189+0.03932726j)	-17.8551	0.12801	17.8918	0.312271	(0.1127998+0.02480883j)	-18.7487	0.115496	12.404	0.21649	(0.1275036+0.02824471j)	-17.6815	0.130595	12.4905	0.218001	(0.1258729+0.0538976j)	-17.2702	0.136927	23.1802	0.40457	(0.1101679+0.05732936j)	-18.1181	0.124192	27.4916
5.15	(0.1002591+0.04107053j)	-19.3038	0.108345	22.2762	0.388792	(0.1132864+0.05411137j)	-18.0239	0.125546	25.5315	0.445609	(0.1144485+0.03970265j)	-18.3343	0.121139	19.1319	0.333914	(0.1071072+0.02953724j)	-19.0853	0.111105	15.4174	0.269084	(0.1084783+0.04392077j)	-18.6339	0.117032	22.0421	0.384707	(0.1213331+0.04096416j)	-17.8516	0.128062	18.6556	0.325601	(0.1136959+0.02548909j)	-18.6721	0.116518	12.636	0.22054	(0.1274879+0.02923957j)	-17.668	0.130798	12.9175	0.225453	(0.1253552+0.05539824j)	-17.2624	0.137051	23.8421	0.416123	(0.1121915+0.0580704j)	-17.9699	0.126329	27.3661
5.1505	(0.1030656+0.04208903j)	-19.0679	0.111328	22.2137	0.387702	(0.1156853+0.05508273j)	-17.847	0.12813	25.4611	0.44438	(0.1175864+0.04125721j)	-18.0886	0.124614	19.3343	0.337447	(0.1103731+0.03041313j)	-18.8249	0.114487	15.4055	0.268876	(0.1111335+0.0446575j)	-18.433	0.11977	21.8921	0.382089	(0.1252507+0.04169115j)	-17.5881	0.132007	18.4106	0.321326	(0.116563+0.02714429j)	-18.4394	0.119682	13.109	0.228795	(0.1304403+0.03059846j)	-17.4591	0.133981	13.2017	0.230412	(0.1297954+0.05647793j)	-16.9818	0.141551	23.5153	0.41042	(0.1146313+0.05988373j)	-17.766	0.129331	27.5827
5.151	(0.1058287+0.04371217j)	-18.8238	0.114501	22.4429	0.391702	(0.1178933+0.05645991j)	-17.6735	0.130716	25.5901	0.446631	(0.1203794+0.04367695j)	-17.8519	0.128058	19.9422	0.348056	(0.1124078+0.03241787j)	-18.6371	0.116989	16.0873	0.280776	(0.1121002+0.04698607j)	-18.305	0.121549	22.7407	0.3969	(0.1272889+0.04342951j)	-17.426	0.134494	18.8391	0.328803	(0.1189746+0.0284273j)	-18.2498	0.122324	13.4381	0.234539	(0.1329641+0.03201278j)	-17.2806	0.136764	13.537	0.236266	(0.1310957+0.05845157j)	-16.8608	0.143536	24.0306	0.419414	(0.1165997+0.06269027j)	-17.5633	0.132384	28.2649
5.1515	(0.1060624+0.04783764j)	-18.6846	0.116352	24.2769	0.423713	(0.1207834+0.06050203j)	-17.3876	0.135089	26.6069	0.464378	(0.1215958+0.04551841j)	-17.7321	0.129836	20.523	0.358194	(0.113094+0.03602339j)	-18.5115	0.118693	17.668	0.308365	(0.1141623+0.05052146j)	-18.0728	0.124842	23.8713	0.416633	(0.1283686+0.04636044j)	-17.2984	0.136484	19.8572	0.346574	(0.120331+0.03195598j)	-18.0965	0.124502	14.8726	0.259576	(0.13334+0.03485101j)	-17.2138	0.137819	14.6477	0.25565	(0.1333592+0.0605321j)	-16.686	0.146454	24.4134	0.426095	(0.1180665+0.06461559j)	-17.4196	0.134592	28.6911
5.152	(0.1081143+0.04815707j)	-18.5363	0.118355	24.0095	0.419045	(0.1225505+0.06030629j)	-17.2919	0.136585	26.2015	0.457302	(0.1238608+0.04582402j)	-17.5842	0.132066	20.3027	0.354348	(0.1150911+0.0361945j)	-18.3696	0.120648	17.4576	0.304693	(0.1161189+0.04999952j)	-17.9633	0.126426	23.2962	0.406595	(0.1292962+0.04647427j)	-17.2406	0.137395	19.7705	0.34506	(0.1214555+0.03235647j)	-18.0139	0.125692	14.9175	0.260359	(0.1358853+0.0359594j)	-17.0426	0.140563	14.8224	0.2587	(0.1353424+0.06192222j)	-16.5459	0.148835	24.5852	0.429092	(0.1203667+0.06483045j)	-17.2836	0.136716	28.3073
5.1525	(0.1094555+0.04965466j)	-18.4025	0.120192	24.4015	0.425886	(0.1225797+0.06146497j)	-17.2576	0.137127	26.6305	0.46479	(0.1233248+0.0479086j)	-17.5686	0.132304	21.2299	0.370532	(0.1153366+0.03772248j)	-18.3193	0.121349	18.1111	0.316098	(0.1153054+0.05221564j)	-17.9529	0.126577	24.3632	0.425219	(0.1304352+0.04749133j)	-17.1515	0.138812	20.0065	0.34918	(0.1214826+0.03375131j)	-17.9868	0.126084	15.5268	0.270994	(0.1357158+0.03637616j)	-17.0461	0.140506	15.0044	0.261877	(0.1351078+0.06259095j)	-16.542	0.148902	24.8567	0.433832	(0.1210364+0.06611686j)	-17.2076	0.137918	28.6458
5.153	(0.1099018+0.05321543j)	-18.2651	0.122108	25.8367	0.450935	(0.1230951+0.064268j)	-17.1483	0.138862	27.5691	0.481171	(0.1242104+0.04999732j)	-17.4647	0.133895	21.9258	0.382678	(0.1158708+0.03973223j)	-18.2377	0.122494	18.9269	0.330337	(0.1176495+0.05505712j)	-17.7282	0.129895	25.0785	0.437702	(0.1307083+0.05015335j)	-17.0774	0.14	20.992	0.36638	(0.1221166+0.03585994j)	-17.9053	0.127273	16.365	0.285624	(0.1364239+0.03951723j)	-16.9523	0.142032	16.1545	0.281948	(0.1363887+0.06492689j)	-16.4173	0.151054	25.4565	0.444299	(0.1220461+0.0691887j)	-17.0592	0.140294	29.5492
5.1535	(0.1108428+0.0536839j)	-18.1907	0.123159	25.8421	0.451029	(0.1251151+0.0653477j)	-17.0062	0.141153	27.5781	0.481329	(0.1259397+0.05035235j)	-17.3527	0.135632	21.7922	0.380345	(0.1161234+0.04166158j)	-18.1758	0.123371	19.7365	0.344466	(0.1178781+0.05581255j)	-17.6929	0.130423	25.3365	0.442205	(0.1313863+0.05083257j)	-17.0232	0.140877	21.1512	0.369157	(0.1223968+0.03667848j)	-17.8711	0.127774	16.6818	0.291153	(0.137187+0.03972377j)	-16.9041	0.142822	16.1489	0.281851	(0.1376769+0.06582402j)	-16.3287	0.152603	25.5527	0.445979	(0.1234191+0.06984589j)	-16.9657	0.141812	29.5066
5.154	(0.110337+0.05450919j)	-18.1972	0.123067	26.2905	0.458856	(0.1250468+0.06679608j)	-16.9684	0.141769	28.1097	0.490607	(0.1250057+0.05255485j)	-17.3546	0.135604	22.8028	0.397985	(0.1164438+0.04262761j)	-18.1315	0.124001	20.1066	0.350927	(0.1174697+0.05773402j)	-17.6618	0.130891	26.1732	0.456808	(0.1313238+0.0525833j)	-16.9873	0.14146	21.8216	0.380859	(0.1222237+0.03901714j)	-17.8354	0.1283	17.7045	0.309002	(0.1378575+0.04122296j)	-16.8395	0.143889	16.648	0.290563	(0.1368593+0.06716236j)	-16.3374	0.152451	26.139	0.456212	(0.1238179+0.07143955j)	-16.8964	0.142949	29.9838
5.1545	(0.1107799+0.05809896j)	-18.0555	0.125091	27.6749	0.483019	(0.1255633+0.06854549j)	-16.89	0.143055	28.6303	0.499693	(0.1251872+0.0543367j)	-17.2992	0.136471	23.4629	0.409506	(0.1159732+0.04548452j)	-18.0915	0.124574	21.415	0.373763	(0.1194781+0.05944581j)	-17.4936	0.13345	26.4524	0.461682	(0.1315308+0.05441193j)	-16.9334	0.142341	22.474	0.392245	(0.1231472+0.04058413j)	-17.7437	0.129662	18.24	0.318349	(0.1363907+0.0431774j)	-16.8895	0.143062	17.5663	0.30659	(0.138396+0.06925124j)	-16.2071	0.154755	26.5827	0.463955	(0.1241799+0.07386665j)	-16.8033	0.144489	30.7457
5.155	(0.1113015+0.05939629j)	-17.9817	0.126158	28.0867	0.490206	(0.1261024+0.07106245j)	-16.7878	0.144747	29.4026	0.513171	(0.1253476+0.05758307j)	-17.2061	0.137941	24.6734	0.430633	(0.116676+0.04793615j)	-17.983	0.126139	22.3352	0.389823	(0.119079+0.06134314j)	-17.4611	0.133951	27.2551	0.475691	(0.1321912+0.05636739j)	-16.8504	0.143707	23.0938	0.403063	(0.1232372+0.04273545j)	-17.692	0.130437	19.1252	0.333798	(0.1365402+0.04523256j)	-16.8426	0.143837	18.3288	0.319898	(0.1385466+0.0711726j)	-16.151	0.155758	27.19	0.474554	(0.1241214+0.0765323j)	-16.7237	0.145819	31.6577
5.1555	(0.1085531+0.06060319j)	-18.1089	0.124324	29.1738	0.509179	(0.1246694+0.07296132j)	-16.8056	0.14445	30.3378	0.529495	(0.1238347+0.0578705j)	-17.2853	0.13669	25.0477	0.437164	(0.1144729+0.04911893j)	-18.092	0.124566	23.2236	0.405328	(0.1181055+0.06282306j)	-17.4725	0.133775	28.0095	0.488859	(0.1303107+0.05789349j)	-16.9181	0.142592	23.9543	0.418081	(0.1209086+0.04457606j)	-17.7974	0.128864	20.2377	0.353215	(0.1352157+0.04689751j)	-16.8861	0.143118	19.1283	0.333852	(0.1373077+0.07229201j)	-16.1835	0.155176	27.7666	0.484619	(0.1225498+0.07773551j)	-16.7652	0.145125	32.3877
5.156	(0.1085722+0.06398079j)	-17.9911	0.126022	30.5105	0.532509	(0.1230708+0.07427131j)	-16.8481	0.143745	31.1103	0.542978	(0.1225502+0.06111114j)	-17.2693	0.136942	26.5037	0.462577	(0.1142228+0.05079392j)	-18.0613	0.125007	23.9743	0.418431	(0.1182337+0.06610421j)	-17.3639	0.135458	29.2095	0.509801	(0.1304459+0.05959139j)	-16.8682	0.143413	24.5523	0.428518	(0.1198507+0.0472218j)	-17.8005	0.128818	21.5047	0.375328	(0.1347196+0.04918267j)	-16.868	0.143417	20.0558	0.35004	(0.1373768+0.07494587j)	-16.1102	0.15649	28.6147	0.49942	(0.1229499+0.07976265j)	-16.6799	0.146556	32.9731
5.1565	(0.1080084+0.06556094j)	-17.9686	0.126349	31.2577	0.54555	(0.122671+0.07641455j)	-16.8012	0.144525	31.9197	0.557104	(0.122645+0.06254185j)	-17.2232	0.137671	27.0189	0.47157	(0.113627+0.05366596j)	-18.0159	0.125663	25.2813	0.441243	(0.1157661+0.06777055j)	-17.4486	0.134144	30.3451	0.529622	(0.1288614+0.0619887j)	-16.8935	0.142996	25.6899	0.448373	(0.119729+0.04932328j)	-17.7552	0.129491	22.3896	0.390772	(0.1330255+0.05070358j)	-16.9322	0.142361	20.8647	0.364157	(0.136214+0.07647694j)	-16.1256	0.156215	29.3119	0.511589	(0.1220939+0.08222082j)	-16.642	0.147198	33.9572
5.157	(0.1075038+0.06671603j)	-17.9566	0.126523	31.8234	0.555423	(0.1233472+0.07706642j)	-16.7461	0.145443	31.9968	0.55845	(0.1227066+0.06290879j)	-17.2092	0.137893	27.1431	0.473737	(0.1128265+0.05444682j)	-18.0426	0.125277	25.7606	0.449608	(0.1166848+0.06923217j)	-17.3498	0.135678	30.6818	0.535498	(0.129651+0.06178175j)	-16.8558	0.143619	25.4789	0.444691	(0.1185454+0.049547j)	-17.8231	0.128483	22.6829	0.395891	(0.1332061+0.05169181j)	-16.9003	0.142884	21.2092	0.37017	(0.1352577+0.07782451j)	-16.1348	0.156049	29.9152	0.522119	(0.1228968+0.08330774j)	-16.5671	0.148472	34.1321
5.1575	(0.1071416+0.06849208j)	-17.9128	0.127163	32.5894	0.568793	(0.1226665+0.07937412j)	-16.7066	0.146107	32.9058	0.574314	(0.1220143+0.06401354j)	-17.2158	0.137787	27.6833	0.483164	(0.1120332+0.05586861j)	-18.0486	0.125191	26.5045	0.46259	(0.1150909+0.06978973j)	-17.4193	0.134598	31.2321	0.545103	(0.1282643+0.06412j)	-16.8691	0.143398	26.5607	0.463572	(0.1183724+0.05073654j)	-17.8025	0.128788	23.2008	0.404931	(0.1330278+0.05351815j)	-16.8696	0.14339	21.9153	0.382494	(0.1368772+0.07775746j)	-16.0587	0.157422	29.6001	0.51662	(0.1216083+0.08323704j)	-16.632	0.147367	34.3904
5.158	(0.1059575+0.07149881j)	-17.8677	0.127824	34.011	0.593604	(0.1202822+0.0815001j)	-16.7551	0.145293	34.1205	0.595516	(0.1205768+0.06763837j)	-17.1865	0.138252	29.2905	0.511216	(0.1096287+0.05833519j)	-18.1187	0.124183	28.0182	0.489009	(0.1136213+0.07282234j)	-17.3962	0.134955	32.6567	0.569967	(0.1258378+0.06631437j)	-16.9395	0.142242	27.7885	0.485	(0.1160338+0.05363583j)	-17.8673	0.127831	24.8084	0.432989	(0.1307615+0.05502297j)	-16.9624	0.141866	22.8208	0.398298	(0.1332573+0.08086791j)	-16.1445	0.155875	31.2517	0.545445	(0.1198092+0.08618435j)	-16.619	0.147587	35.7292
5.1585	(0.1040846+0.07240639j)	-17.9381	0.126792	34.8244	0.6078	(0.1204202+0.08230752j)	-16.7212	0.145861	34.3527	0.599568	(0.1187675+0.06871553j)	-17.2521	0.137213	30.0525	0.524514	(0.1096012+0.05941253j)	-18.0849	0.124669	28.4612	0.496742	(0.1124745+0.07344519j)	-17.4365	0.134331	33.1443	0.578477	(0.1252536+0.06688976j)	-16.9545	0.141995	28.1038	0.490503	(0.1148528+0.05477151j)	-17.9072	0.127244	25.4957	0.444985	(0.1298043+0.0563687j)	-16.9839	0.141515	23.4733	0.409687	(0.1338298+0.08167236j)	-16.094	0.156783	31.3945	0.547937	(0.1193056+0.08763334j)	-16.5929	0.148032	36.2983
5.159	(0.1022215+0.07305537j)	-18.0172	0.125644	35.5525	0.620509	(0.1187449+0.0830632j)	-16.7778	0.144913	34.9732	0.610397	(0.1167483+0.06909526j)	-17.3508	0.135663	30.6184	0.534391	(0.1070825+0.06060738j)	-18.1988	0.123044	29.5093	0.515035	(0.1108654+0.07549732j)	-17.4495	0.13413	34.2542	0.597848	(0.1234381+0.06819473j)	-17.0142	0.141023	28.9189	0.504731	(0.1123103+0.05635033j)	-18.0165	0.125654	26.6447	0.465037	(0.1262885+0.05725517j)	-17.1609	0.138661	24.388	0.425651	(0.1306026+0.08168664j)	-16.2471	0.154045	32.0243	0.55893	(0.1169808+0.08868265j)	-16.6657	0.146796	37.1656
5.1595	(0.09950602+0.07414236j)	-18.1252	0.124091	36.69	0.64036	(0.1155302+0.0843102j)	-16.8919	0.143023	36.1208	0.630426	(0.1143768+0.06988326j)	-17.4556	0.134036	31.4246	0.548462	(0.1041768+0.06191211j)	-18.331	0.121185	30.7229	0.536217	(0.1079556+0.07560693j)	-17.6018	0.131798	35.0056	0.610962	(0.1201162+0.06859609j)	-17.1821	0.138323	29.7299	0.518884	(0.1091876+0.05690859j)	-18.1929	0.123128	27.5285	0.480464	(0.1233998+0.05731815j)	-17.3253	0.136062	24.9145	0.434839	(0.1282287+0.08247125j)	-16.3369	0.15246	32.7474	0.57155	(0.114534+0.08886747j)	-16.7746	0.144967	37.8081
5.16	(0.09957892+0.07627732j)	-18.0316	0.125436	37.4521	0.653662	(0.1153581+0.08474502j)	-16.8847	0.143141	36.302	0.633589	(0.1141154+0.07082435j)	-17.438	0.134307	31.8253	0.555456	(0.1038603+0.06309757j)	-18.3067	0.121525	31.2797	0.545933	(0.1078969+0.07762988j)	-17.5281	0.132922	35.7343	0.623682	(0.1194306+0.06898987j)	-17.2071	0.137925	30.0132	0.523828	(0.107927+0.05828872j)	-18.2258	0.122661	28.3724	0.495192	(0.1231955+0.05789438j)	-17.3215	0.136121	25.1707	0.439311	(0.1282554+0.0834282j)	-16.306	0.153002	33.0434	0.576716	(0.1151964+0.09014638j)	-16.6966	0.146276	38.0448
5.1605	(0.09607585+0.07634092j)	-18.2222	0.122713	38.4703	0.671434	(0.112408+0.08565042j)	-16.9959	0.141321	37.306	0.651112	(0.1103042+0.07127261j)	-17.6329	0.131327	32.8684	0.573661	(0.1005416+0.06317486j)	-18.5079	0.118742	32.143	0.561001	(0.1051687+0.07700603j)	-17.698	0.130347	36.2121	0.632021	(0.1170314+0.06931862j)	-17.3279	0.13602	30.6386	0.534744	(0.1062101+0.05836184j)	-18.3308	0.121189	28.7885	0.502455	(0.1199323+0.0585309j)	-17.4935	0.133453	26.0139	0.454028	(0.1261505+0.08393165j)	-16.3906	0.151521	33.637	0.587076	(0.1117733+0.0902968j)	-16.8515	0.14369	38.9332
5.161	(0.09396517+0.07636791j)	-18.3382	0.121085	39.1016	0.682453	(0.1111397+0.08652071j)	-17.0251	0.140847	37.9003	0.661484	(0.1084211+0.07182071j)	-17.7177	0.130051	33.5214	0.585059	(0.09757335+0.06333815j)	-18.6863	0.116328	32.989	0.575766	(0.1016997+0.07776554j)	-17.8541	0.128025	37.4036	0.652817	(0.114173+0.07000874j)	-17.4626	0.133928	31.5158	0.550055	(0.1033968+0.05854905j)	-18.502	0.118823	29.521	0.515238	(0.1175236+0.05903322j)	-17.6204	0.131517	26.6708	0.465493	(0.1233814+0.08432455j)	-16.5104	0.149444	34.3505	0.599529	(0.1102227+0.09054425j)	-16.9149	0.142644	39.402
5.1615	(0.09124969+0.07603902j)	-18.5052	0.118779	39.8047	0.694723	(0.1076301+0.08597156j)	-17.2181	0.137751	38.6168	0.67399	(0.1056954+0.07186344j)	-17.8686	0.127812	34.2122	0.597116	(0.0954294+0.06458974j)	-18.7685	0.115233	34.0914	0.595008	(0.1008211+0.07782806j)	-17.8989	0.127366	37.6661	0.657397	(0.1112702+0.06993157j)	-17.6267	0.131421	32.1487	0.561101	(0.1013208+0.05876894j)	-18.6266	0.117131	30.115	0.525605	(0.1142486+0.05896126j)	-17.8175	0.128566	27.2973	0.476428	(0.1214918+0.08426709j)	-16.6033	0.147855	34.7453	0.60642	(0.106815+0.09038668j)	-17.0821	0.139926	40.2378
5.162	(0.08991459+0.07880975j)	-18.448	0.119564	41.2344	0.719676	(0.1061485+0.08749316j)	-17.2302	0.137559	39.4971	0.689355	(0.1038217+0.07326699j)	-17.9191	0.127071	35.2106	0.614541	(0.0934552+0.06605443j)	-18.8283	0.114442	35.2528	0.615277	(0.09878681+0.07976858j)	-17.9258	0.126972	38.9203	0.679287	(0.1099319+0.07157949j)	-17.6425	0.131182	33.0692	0.577166	(0.09912689+0.05964525j)	-18.7342	0.115688	31.0356	0.541673	(0.1127082+0.06095827j)	-17.8465	0.128137	28.4068	0.495791	(0.1198821+0.08534969j)	-16.6442	0.147161	35.4488	0.618699	(0.1050581+0.09293657j)	-17.061	0.140265	41.4966
5.1625	(0.08702155+0.07774629j)	-18.6591	0.116693	41.7781	0.729165	(0.1038798+0.08718248j)	-17.3538	0.135616	40.0055	0.698228	(0.1012801+0.07250402j)	-18.0926	0.124557	35.598	0.621302	(0.09113174+0.0657272j)	-18.9877	0.112361	35.8004	0.624834	(0.09525546+0.07996327j)	-18.1057	0.124369	40.0122	0.698344	(0.1074179+0.07174952j)	-17.7763	0.129177	33.7408	0.588889	(0.09546398+0.05991213j)	-18.961	0.112707	32.1119	0.560459	(0.1107552+0.05948207j)	-18.0121	0.125717	28.2384	0.492853	(0.1163956+0.08422655j)	-16.8525	0.143673	35.8904	0.626405	(0.1038883+0.091332j)	-17.1819	0.138327	41.3199
5.163	(0.08426715+0.07715262j)	-18.8427	0.114252	42.4763	0.741352	(0.1006946+0.08565615j)	-17.5755	0.132198	40.3862	0.704873	(0.09871073+0.07101048j)	-18.3014	0.121599	35.7305	0.623614	(0.08715321+0.06481419j)	-19.2824	0.108612	36.6375	0.639445	(0.09295595+0.07744026j)	-18.3452	0.120987	39.7972	0.694592	(0.104574+0.06985849j)	-18.0091	0.125761	33.7441	0.588945	(0.0922884+0.05910071j)	-19.2046	0.10959	32.6352	0.569591	(0.107149+0.05838473j)	-18.2711	0.122023	28.5857	0.498914	(0.1139156+0.08296439j)	-17.0202	0.140925	36.0657	0.629466	(0.1008569+0.09100302j)	-17.3392	0.135844	42.0599
5.1635	(0.08249789+0.07611155j)	-18.9967	0.112245	42.6943	0.745155	(0.0993641+0.08382931j)	-17.721	0.130002	40.1529	0.700801	(0.09691688+0.0705226j)	-18.4265	0.11986	36.0419	0.62905	(0.08632156+0.06369855j)	-19.3897	0.10728	36.4244	0.635726	(0.09127671+0.07658175j)	-18.4783	0.119148	39.9969	0.698077	(0.1019188+0.06854647j)	-18.2142	0.122825	33.9232	0.592071	(0.0917683+0.05740931j)	-19.3117	0.108246	32.0297	0.559023	(0.1051807+0.05784809j)	-18.4135	0.120039	28.8103	0.502834	(0.1131143+0.08201172j)	-17.095	0.139717	35.9434	0.627331	(0.09889797+0.08858266j)	-17.538	0.132769	41.8507
5.164	(0.07900742+0.07615767j)	-19.193	0.109737	43.9478	0.767034	(0.09744155+0.08392153j)	-17.8153	0.128599	40.7367	0.710989	(0.09414413+0.07010344j)	-18.6083	0.117378	36.6728	0.640062	(0.083524+0.06346054j)	-19.5847	0.104898	37.2271	0.649736	(0.08822259+0.0761975j)	-18.668	0.116573	40.817	0.712392	(0.09989024+0.06958314j)	-18.2916	0.121737	34.8609	0.608438	(0.08796926+0.05782711j)	-19.5536	0.105274	33.3192	0.581529	(0.1016061+0.05766527j)	-18.649	0.116829	29.5765	0.516208	(0.1094998+0.08154055j)	-17.2958	0.136525	36.6737	0.640077	(0.095773+0.08936847j)	-17.655	0.130993	43.0188
5.1645	(0.07756295+0.07583195j)	-19.2935	0.108473	44.3535	0.774114	(0.09465146+0.08268532j)	-18.0146	0.125681	41.1397	0.718023	(0.09078132+0.06864991j)	-18.8759	0.113816	37.097	0.647465	(0.08011689+0.06272002j)	-19.8495	0.101747	38.0558	0.6642	(0.08632283+0.07637826j)	-18.7663	0.115262	41.5023	0.724352	(0.09775215+0.06713464j)	-18.5194	0.118586	34.4807	0.601801	(0.08484315+0.05637511j)	-19.8395	0.101865	33.6026	0.586475	(0.09959128+0.05464232j)	-18.8927	0.113597	28.7521	0.501818	(0.1069373+0.07918984j)	-17.5186	0.133066	36.5209	0.63741	(0.09376634+0.08748946j)	-17.8393	0.128244	43.0166
5.165	(0.07506458+0.07352004j)	-19.5704	0.105071	44.4044	0.775004	(0.09325257+0.08044013j)	-18.1911	0.123153	40.7812	0.711767	(0.08825127+0.066447j)	-19.1352	0.110469	36.9772	0.645373	(0.07811069+0.06010084j)	-20.1263	0.0985565	37.5758	0.655822	(0.0836649+0.07367754j)	-19.0559	0.111482	41.368	0.722008	(0.09545575+0.06601754j)	-18.7063	0.116061	34.6679	0.605069	(0.08297047+0.05377791j)	-20.0983	0.0988745	32.9496	0.575079	(0.09644847+0.05287764j)	-19.1727	0.109993	28.7336	0.501497	(0.1047373+0.07711045j)	-17.717	0.130061	36.3615	0.634628	(0.09289911+0.08600699j)	-17.9514	0.1266	42.7938
5.1655	(0.07401433+0.07264233j)	-19.6839	0.103706	44.464	0.776043	(0.09085944+0.07975542j)	-18.3516	0.120898	41.2763	0.720407	(0.08611223+0.0664958j)	-19.2676	0.108798	37.6753	0.657558	(0.07665828+0.05901873j)	-20.2874	0.0967456	37.5924	0.656112	(0.08217263+0.07314008j)	-19.1715	0.110008	41.6716	0.727306	(0.09317046+0.06266214j)	-18.9938	0.112282	33.923	0.592067	(0.08020978+0.0539693j)	-20.2936	0.0966762	33.9347	0.592272	(0.0951056+0.05124101j)	-19.329	0.108031	28.3149	0.494188	(0.1028799+0.07676266j)	-17.8313	0.128362	36.728	0.641025	(0.09054968+0.08462419j)	-18.1359	0.123937	43.0626
5.166	(0.07065955+0.07213742j)	-19.9155	0.100978	45.593	0.795747	(0.08895836+0.07873166j)	-18.504	0.118795	41.5101	0.724488	(0.08488049+0.06410324j)	-19.4639	0.106367	37.0607	0.646832	(0.0730632+0.0570667j)	-20.6576	0.0927084	37.992	0.663085	(0.07913123+0.07148856j)	-19.4415	0.106641	42.0952	0.7347	(0.09080416+0.06227825j)	-19.1635	0.110109	34.4444	0.601168	(0.07848842+0.05295774j)	-20.4745	0.0946834	34.0083	0.593558	(0.09292193+0.05055322j)	-19.5117	0.105783	28.5479	0.498256	(0.1011032+0.07394859j)	-18.0437	0.125261	36.1824	0.631501	(0.08799651+0.08325779j)	-18.3341	0.121141	43.415
5.1665	(0.06835848+0.06847589j)	-20.2864	0.0967565	45.0492	0.786256	(0.08718644+0.07568926j)	-18.7516	0.115457	40.9623	0.714926	(0.08195562+0.06196825j)	-19.7647	0.102746	37.0936	0.647406	(0.07116362+0.05521617j)	-20.9081	0.0900727	37.808	0.659875	(0.0767312+0.06794804j)	-19.7862	0.102492	41.526	0.724765	(0.08850601+0.05887441j)	-19.4694	0.106299	33.6319	0.586988	(0.07445629+0.04874403j)	-21.0129	0.0889928	33.2114	0.579649	(0.08994225+0.04780829j)	-19.84	0.101859	27.9926	0.488563	(0.09897947+0.07151432j)	-18.2649	0.122112	35.8487	0.625679	(0.08695362+0.08019987j)	-18.5409	0.118292	42.6863
5.167	(0.0668795+0.06720231j)	-20.4629	0.0948104	45.1379	0.787806	(0.08463904+0.07406606j)	-18.9792	0.11247	41.1886	0.718876	(0.07981653+0.06020681j)	-20.0019	0.0999777	37.0278	0.646257	(0.0683227+0.05362637j)	-21.2241	0.0868549	38.1283	0.665465	(0.07408456+0.0667302j)	-20.0255	0.0997068	42.0103	0.733218	(0.08568235+0.05791856j)	-19.7078	0.103422	34.0575	0.594415	(0.07328283+0.04787777j)	-21.1562	0.0875366	33.1577	0.578712	(0.08667551+0.04726041j)	-20.1117	0.0987228	28.6017	0.499194	(0.09615199+0.06885456j)	-18.543	0.118263	35.6065	0.621451	(0.08383475+0.07878824j)	-18.7825	0.115047	43.2226
5.1675	(0.06479168+0.06617635j)	-20.6665	0.0926136	45.6057	0.79597	(0.08204752+0.07172313j)	-19.2533	0.108977	41.1588	0.718357	(0.0784827+0.05812873j)	-20.2052	0.0976652	36.5257	0.637494	(0.0660572+0.05231972j)	-21.4869	0.0842669	38.3805	0.669866	(0.0727753+0.06527334j)	-20.1969	0.0977592	41.8894	0.731109	(0.08429543+0.05632732j)	-19.8807	0.101383	33.7514	0.589073	(0.07048097+0.04585765j)	-21.5055	0.0840862	33.0496	0.576824	(0.0847724+0.04462135j)	-20.3728	0.0957989	27.7608	0.484518	(0.09509307+0.068275j)	-18.6315	0.117065	35.6776	0.622692	(0.08217423+0.07668833j)	-18.9847	0.1124	43.0222
5.168	(0.06306225+0.06239433j)	-21.0403	0.0887125	44.695	0.780074	(0.08138827+0.06880089j)	-19.4471	0.106572	40.2092	0.701783	(0.07621912+0.05578937j)	-20.4955	0.0944553	36.2026	0.631855	(0.06571464+0.05090837j)	-21.6052	0.0831269	37.7645	0.659115	(0.07247384+0.06229939j)	-20.3935	0.0955702	40.6828	0.710048	(0.08259913+0.05307351j)	-20.1595	0.0981805	32.7225	0.571115	(0.0693774+0.0438845j)	-21.714	0.0820919	32.3153	0.564008	(0.08370952+0.04267503j)	-20.5412	0.0939598	27.0124	0.471456	(0.09319591+0.06461614j)	-18.9073	0.113405	34.735	0.60624	(0.08063343+0.07359438j)	-19.238	0.109169	42.3868
5.1685	(0.06352201+0.06151939j)	-21.0681	0.088429	44.0824	0.769384	(0.08113939+0.06685321j)	-19.5652	0.105133	39.4861	0.689163	(0.07597791+0.05308295j)	-20.6598	0.0926846	34.9406	0.609828	(0.06507705+0.04820396j)	-21.8319	0.0809855	36.5281	0.637536	(0.07149193+0.06048037j)	-20.5705	0.0936428	40.2304	0.702153	(0.08160428+0.04994971j)	-20.3838	0.0956778	31.4707	0.549267	(0.06778241+0.04201068j)	-21.9659	0.0797455	31.7901	0.554842	(0.08241007+0.03916055j)	-20.7962	0.0912413	25.4167	0.443604	(0.093031+0.06215962j)	-19.0244	0.111886	33.7493	0.589036	(0.08090922+0.07163666j)	-19.3263	0.108065	41.5215
5.169	(0.06059603+0.05931151j)	-21.4329	0.0847923	44.3862	0.774686	(0.07835521+0.0633408j)	-19.9347	0.100755	38.9514	0.67983	(0.07286534+0.04991267j)	-21.0787	0.0883212	34.4111	0.600587	(0.06139462+0.04457115j)	-22.3989	0.0758676	35.9788	0.627949	(0.07019652+0.05760062j)	-20.8379	0.0908041	39.371	0.687154	(0.07951262+0.04833651j)	-20.6255	0.093052	31.2958	0.546215	(0.06625066+0.03865836j)	-22.3036	0.0767048	30.2643	0.528211	(0.07936787+0.03615257j)	-21.1883	0.0872139	24.4896	0.427424	(0.0912491+0.05989311j)	-19.2396	0.109149	33.2797	0.58084	(0.07919843+0.06921417j)	-19.5613	0.105181	41.1513
5.1695	(0.06069162+0.05428682j)	-21.7845	0.0814281	41.8117	0.729751	(0.078067+0.06193358j)	-20.0304	0.0996505	38.4263	0.670666	(0.07232708+0.04635731j)	-21.3193	0.0859081	32.6574	0.56998	(0.06132585+0.04119018j)	-22.6301	0.0738748	33.8877	0.591452	(0.06831194+0.05487905j)	-21.1474	0.0876255	38.777	0.676786	(0.07833648+0.04526084j)	-20.8697	0.0904718	30.0182	0.523917	(0.065456+0.03446263j)	-22.6184	0.0739741	27.7668	0.484623	(0.07865417+0.03265597j)	-21.3949	0.0851639	22.5475	0.393527	(0.0884893+0.0555738j)	-19.6182	0.104493	32.13	0.560774	(0.07818169+0.06479497j)	-19.8671	0.101542	39.6511
5.17	(0.05891729+0.05221695j)	-22.0776	0.0787265	41.5498	0.725181	(0.07670928+0.05698143j)	-20.3947	0.0955573	36.6058	0.638892	(0.07056744+0.04389386j)	-21.6075	0.083105	31.8821	0.556448	(0.05879711+0.03892006j)	-23.0348	0.0705115	33.5021	0.584722	(0.06774561+0.05153631j)	-21.3993	0.0851203	37.2614	0.650335	(0.07764398+0.04210241j)	-21.0784	0.0883244	28.4687	0.496873	(0.06358936+0.03336911j)	-22.8759	0.071813	27.6887	0.483258	(0.07777988+0.03134666j)	-21.529	0.0838589	21.9503	0.383105	(0.08843747+0.05159822j)	-19.7949	0.102389	30.2611	0.528156	(0.07777758+0.06222664j)	-20.0342	0.0996068	38.6619
5.1705	(0.05872332+0.04952956j)	-22.2903	0.0768219	40.1456	0.700673	(0.0765591+0.0550797j)	-20.5085	0.0943137	35.7328	0.623654	(0.07000991+0.04094586j)	-21.8191	0.0811046	30.3216	0.529211	(0.05863716+0.03595072j)	-23.2507	0.0687806	31.5127	0.55	(0.06654985+0.04806092j)	-21.7142	0.0820898	35.836	0.625457	(0.07560489+0.0384585j)	-21.4296	0.0848243	26.9614	0.470565	(0.06292024+0.03079713j)	-23.0915	0.070053	26.08	0.455183	(0.07616279+0.02699177j)	-21.8513	0.0808042	19.5141	0.340585	(0.08794898+0.04924882j)	-19.9309	0.100799	29.2475	0.510466	(0.07733822+0.06021808j)	-20.1739	0.0980174	37.9055
5.171	(0.05707937+0.04709744j)	-22.6152	0.0740015	39.5268	0.689873	(0.07599884+0.05189551j)	-20.7217	0.092027	34.3271	0.59912	(0.06981169+0.03851954j)	-21.9672	0.0797335	28.8883	0.504196	(0.05707621+0.03359497j)	-23.579	0.0662293	30.481	0.531994	(0.06570418+0.04621712j)	-21.9023	0.0803309	35.123	0.613012	(0.07614207+0.03561393j)	-21.5083	0.0840593	25.0669	0.4375	(0.06163481+0.02775517j)	-23.4016	0.0675959	24.2428	0.423117	(0.0773588+0.02285949j)	-21.8662	0.0806656	16.4624	0.287323	(0.08748055+0.04663579j)	-20.0755	0.099135	28.062	0.489775	(0.07566577+0.05804795j)	-20.412	0.095367	37.4941
5.1715	(0.05906995+0.04395029j)	-22.6593	0.0736267	36.6507	0.639675	(0.07646413+0.04975874j)	-20.7974	0.0912288	33.0539	0.5769	(0.0704896+0.03699785j)	-21.9807	0.0796092	27.6936	0.483345	(0.05731714+0.03211857j)	-23.6483	0.0657028	29.2648	0.510767	(0.06613179+0.0442396j)	-21.9856	0.0795648	33.781	0.589589	(0.07613109+0.03287274j)	-21.6263	0.082925	23.3543	0.407609	(0.06310312+0.02509961j)	-23.3611	0.0679117	21.6905	0.37857	(0.07700069+0.02173925j)	-21.937	0.0800106	15.7657	0.275164	(0.08792081+0.04457003j)	-20.1249	0.0985726	26.882	0.469179	(0.07646855+0.05260129j)	-20.6478	0.0928134	34.5234
5.172	(0.05698498+0.04254116j)	-22.961	0.0711129	36.7425	0.641278	(0.07518389+0.04655156j)	-21.0681	0.0884289	31.7645	0.554395	(0.06898199+0.03290856j)	-22.3348	0.0764296	25.504	0.445128	(0.05797802+0.02826951j)	-23.8084	0.0645028	25.9934	0.453671	(0.06516918+0.04044123j)	-22.3044	0.0766976	31.822	0.555398	(0.07340858+0.03142487j)	-21.9543	0.079852	23.1749	0.404478	(0.0598096+0.02213289j)	-23.9072	0.0637735	20.3073	0.354429	(0.07547557+0.01951628j)	-22.1628	0.077958	14.4978	0.253035	(0.08746392+0.04090582j)	-20.3043	0.0965568	25.0649	0.437465	(0.0758726+0.05054379j)	-20.8033	0.0911665	33.6702
5.1725	(0.05931018+0.03776252j)	-23.0595	0.0703115	32.4847	0.566965	(0.07670115+0.0425577j)	-21.1384	0.0877167	29.0237	0.50656	(0.0706813+0.0284698j)	-22.3609	0.0761996	21.9391	0.38291	(0.05806918+0.0244111j)	-24.0144	0.0629915	22.8009	0.397951	(0.06611178+0.03678507j)	-22.4231	0.0756565	29.0919	0.507749	(0.07639622+0.02598126j)	-21.8633	0.0806933	18.7824	0.327815	(0.06241457+0.01846869j)	-23.7298	0.0650897	16.4837	0.287694	(0.07664693+0.01342585j)	-22.1789	0.0778139	9.93541	0.173406	(0.08934497+0.03527139j)	-20.3496	0.0960552	21.543	0.375996	(0.07738292+0.04602569j)	-20.9117	0.090036	30.7433
5.173	(0.05824693+0.03573077j)	-23.3074	0.068333	31.5265	0.55024	(0.0751399+0.03989127j)	-21.4042	0.0850724	27.9635	0.488056	(0.06913274+0.02738478j)	-22.5733	0.074359	21.6095	0.377156	(0.05714836+0.0237849j)	-24.1661	0.0619004	22.5969	0.39439	(0.06634601+0.03590204j)	-22.4483	0.0754371	28.4193	0.49601	(0.07629325+0.02461908j)	-21.9201	0.0801671	17.8844	0.312141	(0.06176802+0.01602028j)	-23.902	0.0638117	14.54	0.25377	(0.07554262+0.01146532j)	-22.3373	0.0764077	8.63008	0.150623	(0.08740436+0.03420837j)	-20.5504	0.0938602	21.3744	0.373054	(0.07657754+0.04507942j)	-21.0258	0.088861	30.4843
5.1735	(0.05726646+0.03220629j)	-23.6485	0.0657015	29.3531	0.512309	(0.0771846+0.03535596j)	-21.4221	0.084897	24.6111	0.429545	(0.06913738+0.02283014j)	-22.7563	0.0728093	18.274	0.318941	(0.0581749+0.01857258j)	-24.2838	0.0610677	17.7059	0.309026	(0.0657054+0.03104707j)	-22.7727	0.0726713	25.2916	0.441422	(0.07638682+0.02015983j)	-22.0472	0.0790023	14.7843	0.258034	(0.06216507+0.01245251j)	-23.9582	0.0634	11.3272	0.197697	(0.07567459+0.00826324j)	-22.3695	0.0761244	6.23169	0.108763	(0.08740787+0.02868286j)	-20.7248	0.0919937	18.1672	0.317078	(0.07655755+0.0390855j)	-21.3143	0.0859577	27.046
5.174	(0.05963302+0.0292932j)	-23.5515	0.0664394	26.1614	0.456603	(0.0764607+0.03287056j)	-21.5947	0.0832269	23.2629	0.406015	(0.0697882+0.0194715j)	-22.7988	0.0724537	15.5896	0.272089	(0.05756582+0.01625872j)	-24.4634	0.0598178	15.7716	0.275267	(0.06700587+0.02692153j)	-22.8278	0.0722119	21.8892	0.382039	(0.07488522+0.01719117j)	-22.289	0.0768331	12.9292	0.225657	(0.06187847+0.01058094j)	-24.044	0.0627766	9.70347	0.169358	(0.07652197+0.005010451j)	-22.3057	0.0766858	3.74622	0.065384	(0.08823122+0.02800355j)	-20.6707	0.0925686	17.6088	0.307332	(0.07845986+0.03782857j)	-21.1993	0.0871031	25.7405
5.1745	(0.05989388+0.02739499j)	-23.6273	0.0658617	24.579	0.428984	(0.07841555+0.03065601j)	-21.4943	0.0841949	21.3527	0.372674	(0.07084285+0.01730787j)	-22.7423	0.0729265	13.7292	0.23962	(0.05874837+0.01389134j)	-24.3838	0.0603684	13.3035	0.23219	(0.06847119+0.02513673j)	-22.7408	0.0729394	20.1589	0.351839	(0.07592624+0.01434901j)	-22.2398	0.0772702	10.7019	0.186783	(0.06312755+0.00570086j)	-23.9603	0.0633844	5.16021	0.0900627	(0.07693519+0.00196613j)	-22.2747	0.0769603	1.46391	0.0255501	(0.08920094+0.02428281j)	-20.6821	0.0924471	15.2284	0.265785	(0.07970764+0.03503408j)	-21.2029	0.0870672	23.727
5.175	(0.06180135+0.02486806j)	-23.5283	0.066617	21.9192	0.382562	(0.07958669+0.02825304j)	-21.4677	0.0844528	19.5447	0.34112	(0.0731336+0.01540159j)	-22.5292	0.0747378	11.8924	0.207562	(0.05923008+0.01241483j)	-24.3624	0.0605172	11.838	0.206612	(0.06874648+0.02382215j)	-22.7625	0.0727569	19.1123	0.333573	(0.07822385+0.01383138j)	-21.9995	0.0794373	10.0273	0.175009	(0.06376261+0.00464214j)	-23.8857	0.0639314	4.16399	0.0726753	(0.0775678-6.642539999999987e-05j)	-22.2064	0.0775678	-0.0490654	-0.000856353	(0.09003738+0.02271947j)	-20.6435	0.0928596	14.162	0.247174	(0.08058947+0.03343645j)	-21.1846	0.0872506	22.5335
5.1755	(0.06474853+0.02109605j)	-23.3372	0.0680986	18.0464	0.314969	(0.08255193+0.02416455j)	-21.3084	0.086016	16.3158	0.284764	(0.0754014+0.01149025j)	-22.3527	0.0762719	8.66452	0.151224	(0.06400735+0.008477003j)	-23.7999	0.0645662	7.54423	0.131672	(0.0714905+0.01859405j)	-22.6308	0.073869	14.5791	0.254453	(0.08096828+0.008526998j)	-21.7858	0.081416	6.01182	0.104926	(0.06620767+0.002771158j)	-23.5742	0.0662656	2.39675	0.0418311	(0.08069627-0.003540714j)	-21.8546	0.0807739	-2.51236	-0.0438489	(0.09406125+0.01836996j)	-20.3692	0.0958383	11.0506	0.19287	(0.08390374+0.02918834j)	-21.0282	0.0888358	19.1817
5.176	(0.06601794+0.01837526j)	-23.2827	0.0685275	15.5539	0.271466	(0.08349848+0.02145432j)	-21.2888	0.0862107	14.41	0.251502	(0.07597043+0.009234005j)	-22.3234	0.0765296	6.93016	0.120954	(0.06396782+0.006634044j)	-23.8343	0.0643109	5.92093	0.10334	(0.07321405+0.01660543j)	-22.4903	0.0750735	12.7789	0.223033	(0.0820073+0.007280698j)	-21.6889	0.0823299	5.07348	0.0885489	(0.06689554+0.0003095859000000001j)	-23.492	0.0668963	0.265157	0.00462787	(0.08052579-0.00573039j)	-21.8594	0.0807294	-4.07043	-0.0710424	(0.09458444+0.01569181j)	-20.3657	0.0958773	9.41973	0.164405	(0.0844259+0.02625171j)	-21.0697	0.0884131	17.2728
5.1765	(0.06750589+0.01650894j)	-23.1609	0.0694953	13.7423	0.239848	(0.08455482+0.02050549j)	-21.209	0.0870057	13.6317	0.237918	(0.07800117+0.007717679j)	-22.1157	0.078382	5.65063	0.0986221	(0.06553145+0.005027477j)	-23.6455	0.065724	4.38705	0.0765686	(0.07244469+0.01544686j)	-22.6068	0.0740732	12.0365	0.210077	(0.08333279+0.004326754j)	-21.572	0.083445	2.97221	0.0518748	(0.06827997-0.0013752859999999999j)	-23.3124	0.0682938	-1.15389	-0.0201391	(0.08245975-0.007648571j)	-21.638	0.0828137	-5.29932	-0.0924906	(0.09687222+0.01347864j)	-20.1927	0.0978054	7.92118	0.138251	(0.08651392+0.02447779j)	-20.9238	0.0899101	15.798
5.177	(0.06817161+0.01492782j)	-23.1245	0.0697869	12.3513	0.215572	(0.08682359+0.01673236j)	-21.0689	0.0884212	10.9081	0.190383	(0.07827941+0.004398409j)	-22.1134	0.0784029	3.21599	0.0561296	(0.06581097+0.0008911639000000002j)	-23.6332	0.065817	0.77581	0.0135404	(0.07611267+0.01271215j)	-22.2514	0.0771669	9.48188	0.16549	(0.08358201+0.002274647j)	-21.5545	0.083613	1.55889	0.0272078	(0.06839456-0.004249014j)	-23.2828	0.0685264	-3.55493	-0.0620453	(0.08289538-0.01032738j)	-21.5625	0.0835362	-7.10151	-0.123945	(0.09819145+0.01175941j)	-20.0967	0.0988931	6.82922	0.119192	(0.08823829+0.0218347j)	-20.8288	0.0908997	13.8987
5.1775	(0.07163922+0.01243101j)	-22.7681	0.0727098	9.84408	0.171812	(0.08945968+0.01592316j)	-20.832	0.0908657	10.0925	0.176148	(0.0807218+0.002042283j)	-21.8574	0.0807476	1.44929	0.0252949	(0.06968398-0.0007242303000000001j)	-23.1369	0.0696877	-0.595457	-0.0103927	(0.07877925+0.01052374j)	-21.9949	0.079479	7.60882	0.132799	(0.08756753-0.001367742j)	-21.1521	0.0875782	-0.894846	-0.015618	(0.07195468-0.007037966j)	-22.8175	0.0722981	-5.58639	-0.097501	(0.08583769-0.01215216j)	-21.2403	0.0866936	-8.05789	-0.140637	(0.1003062+0.008154467j)	-19.9448	0.100637	4.64768	0.0811174	(0.0904574+0.0189719j)	-20.6842	0.0924255	11.8451
5.178	(0.07363059+0.01211227j)	-22.5429	0.0746202	9.34152	0.16304	(0.09084191+0.01339437j)	-20.7409	0.0918241	8.38766	0.146392	(0.08383336+0.001992323j)	-21.5292	0.083857	1.36139	0.0237608	(0.07019781-0.001453403j)	-23.0717	0.0702129	-1.1861	-0.0207014	(0.08044607+0.009767204j)	-21.8264	0.0810368	6.92257	0.120822	(0.08993459-0.001056832j)	-20.9209	0.0899408	-0.673258	-0.0117506	(0.07464137-0.007439561j)	-22.4975	0.0750112	-5.69191	-0.0993426	(0.08616178-0.0145644j)	-21.1714	0.0873841	-9.59433	-0.167453	(0.1020264+0.007196998j)	-19.8042	0.10228	4.03499	0.0704239	(0.09287716+0.01811071j)	-20.4797	0.0946264	11.034
5.1785	(0.07486012+0.009124557j)	-22.4509	0.0754142	6.94939	0.12129	(0.09353475+0.009869373j)	-20.5325	0.094054	6.02331	0.105127	(0.08589465-0.001337468j)	-21.3196	0.0859051	-0.892082	-0.0155698	(0.07223815-0.003899634j)	-22.812	0.0723433	-3.09	-0.0539307	(0.08206949+0.006601278j)	-21.6884	0.0823345	4.5987	0.0802624	(0.09169815-0.0033395179999999997j)	-20.747	0.0917589	-2.08571	-0.0364025	(0.07625123-0.01015607j)	-22.2787	0.0769246	-7.5867	-0.132413	(0.08940257-0.01520296j)	-20.8492	0.090686	-9.65086	-0.168439	(0.1036076+0.003712009j)	-19.6866	0.103674	2.05189	0.0358123	(0.09604605+0.01564236j)	-20.2367	0.0973115	9.25016
5.179	(0.07743548+0.007749587j)	-22.1779	0.0778223	5.71502	0.0997459	(0.09655043+0.009049631j)	-20.2669	0.0969736	5.35467	0.0934565	(0.08810543-0.003005772j)	-21.0949	0.0881567	-1.95392	-0.0341024	(0.07546488-0.005309946j)	-22.4237	0.0756515	-4.02488	-0.0702474	(0.08604797+0.005094047j)	-21.29	0.0861986	3.38796	0.0591311	(0.09423781-0.005978552j)	-20.4981	0.0944273	-3.63004	-0.0633562	(0.0785908-0.01274073j)	-21.9799	0.0796168	-9.20838	-0.160717	(0.09168492-0.01647173j)	-20.6161	0.0931528	-10.1849	-0.17776	(0.1076757+0.00309685j)	-19.3541	0.10772	1.64742	0.028753	(0.09748683+0.01437301j)	-20.1277	0.0985407	8.387
5.1795	(0.08154278+0.006799298j)	-21.7422	0.0818258	4.76648	0.0831908	(0.09875213+0.006983234j)	-20.0874	0.0989987	4.04492	0.0705972	(0.09024633-0.004212047j)	-20.882	0.0903446	-2.67221	-0.0466389	(0.07837562-0.007486039j)	-22.0769	0.0787323	-5.45605	-0.095226	(0.08865963+0.005421192j)	-21.0293	0.0888252	3.49906	0.0610701	(0.09639931-0.007037795j)	-20.2954	0.0966559	-4.17557	-0.0728774	(0.08035816-0.01295183j)	-21.788	0.0813952	-9.15598	-0.159802	(0.09494194-0.01903864j)	-20.2796	0.096832	-11.3391	-0.197904	(0.1089913+0.001313723j)	-19.2515	0.108999	0.690579	0.0120529	(0.1005228+0.01289249j)	-19.8839	0.101346	7.30854
5.18	(0.08266875+0.007349546j)	-21.619	0.0829948	5.08044	0.0886704	(0.1015457+0.006470021j)	-19.8492	0.101752	3.64569	0.0636294	(0.09360902-0.004335331j)	-20.5643	0.0937094	-2.65165	-0.0462801	(0.07913037-0.006425375j)	-22.0046	0.0793908	-4.64222	-0.0810221	(0.08985467+0.003324309j)	-20.9232	0.0899161	2.11878	0.0369796	(0.09794645-0.007496556j)	-20.1549	0.0982329	-4.37673	-0.0763884	(0.08276079-0.0130718j)	-21.5365	0.0837868	-8.97554	-0.156653	(0.09639293-0.01929122j)	-20.1485	0.0983044	-11.3172	-0.197522	(0.1125345+0.0009910357j)	-18.9739	0.112539	0.504563	0.00880628	(0.1020095+0.01243579j)	-19.7631	0.102765	6.95053
5.1805	(0.085164+0.005184169j)	-21.3788	0.0853216	3.48345	0.0607978	(0.1029914+0.006467782j)	-19.7269	0.103194	3.59341	0.0627169	(0.09488694-0.003347416j)	-20.4505	0.094946	-2.02044	-0.0352633	(0.08118194-0.006933844j)	-21.7792	0.0814775	-4.88185	-0.0852044	(0.09171001+0.004028603j)	-20.7433	0.0917985	2.51525	0.0438994	(0.1001943-0.007997563j)	-19.9556	0.100513	-4.5637	-0.0796517	(0.08470319-0.01376749j)	-21.3288	0.0858148	-9.23201	-0.161129	(0.09861627-0.0202717j)	-19.9413	0.100678	-11.616	-0.202737	(0.1135563+0.0005449884j)	-18.8957	0.113558	0.274976	0.00479924	(0.1061485+0.01306157j)	-19.4165	0.106949	7.01498
5.181	(0.0865416+0.004984705j)	-21.2411	0.086685	3.29653	0.0575354	(0.106054+0.00518263j)	-19.4791	0.106181	2.7977	0.048829	(0.09653867-0.005911783j)	-20.2897	0.0967195	-3.50427	-0.0611611	(0.08436922-0.006788582j)	-21.4483	0.0846419	-4.60027	-0.0802898	(0.09536751+0.0017686810000000002j)	-20.4105	0.0953839	1.06248	0.0185438	(0.102634-0.01018186j)	-19.7316	0.103138	-5.66552	-0.098882	(0.08613836-0.01505927j)	-21.1653	0.0874448	-9.9166	-0.173077	(0.09962009-0.0205908j)	-19.8514	0.101726	-11.6782	-0.203823	(0.1164338-0.0016315180000000002j)	-18.6776	0.116445	-0.802799	-0.0140115	(0.1068129+0.01060471j)	-19.3849	0.107338	5.66992
5.1815	(0.08998556+0.004475074j)	-20.9058	0.0900968	2.84703	0.0496901	(0.108594+0.004697933j)	-19.2758	0.108696	2.47715	0.0432345	(0.09875015-0.006381438j)	-20.0911	0.0989561	-3.69743	-0.0645323	(0.08633034-0.007717969j)	-21.2422	0.0866746	-5.10869	-0.0891634	(0.09760442+0.003382686j)	-20.2054	0.097663	1.98491	0.0346432	(0.1041336-0.009123175j)	-19.615	0.104532	-5.00692	-0.0873872	(0.0888152-0.0143526j)	-20.9183	0.0899674	-9.17968	-0.160216	(0.1023168-0.02147752j)	-19.6138	0.104547	-11.8549	-0.206908	(0.1180321-0.001600062j)	-18.5592	0.118043	-0.776663	-0.0135553	(0.109458+0.009545119j)	-19.1821	0.109873	4.98378
5.182	(0.0927304+0.005272952j)	-20.6415	0.0928802	3.25452	0.0568021	(0.1107135+0.004852594j)	-19.1077	0.11082	2.50968	0.0438022	(0.1012283-0.005858677j)	-19.8794	0.101398	-3.31235	-0.0578114	(0.0883005-0.008287665j)	-21.0426	0.0886886	-5.36193	-0.0935834	(0.1007485+0.002260621j)	-19.933	0.100774	1.2854	0.0224345	(0.1052786-0.009277407j)	-19.5196	0.105687	-5.03603	-0.0878954	(0.08981565-0.01462721j)	-20.8193	0.0909989	-9.24988	-0.161441	(0.1040362-0.02151631j)	-19.4744	0.106238	-11.6849	-0.20394	(0.1205385-0.001637593j)	-18.3767	0.12055	-0.778352	-0.0135848	(0.1130438+0.009751694j)	-18.9029	0.113464	4.9304
5.1825	(0.09578927+0.004207643j)	-20.3653	0.0958816	2.51516	0.0438978	(0.1141349+0.005476953j)	-18.8416	0.114266	2.74733	0.0479499	(0.1051688-0.006943352j)	-19.5434	0.105398	-3.77724	-0.0659254	(0.0916696-0.008318961j)	-20.7199	0.0920463	-5.18535	-0.0905015	(0.1022786+0.003705475j)	-19.7986	0.102346	2.07487	0.0362134	(0.1091956-0.009982637j)	-19.1998	0.109651	-5.22345	-0.0911664	(0.09332637-0.01432174j)	-20.4988	0.0944189	-8.72447	-0.152271	(0.1066372-0.02228382j)	-19.2562	0.108941	-11.8032	-0.206004	(0.1238261-0.001527913j)	-18.1431	0.123836	-0.706947	-0.0123386	(0.1158459+0.009573249j)	-18.6928	0.116241	4.72406
5.183	(0.09816489+0.00608536j)	-20.1442	0.0983533	3.5473	0.061912	(0.1161427+0.004919561j)	-18.6924	0.116247	2.42548	0.0423326	(0.1067579-0.005191653j)	-19.4217	0.106884	-2.78411	-0.0485919	(0.09389596-0.007548336j)	-20.5191	0.0941989	-4.59615	-0.0802179	(0.1046093+0.002777492j)	-19.6055	0.104646	1.52091	0.0265449	(0.111629-0.008718825j)	-19.018	0.111969	-4.46604	-0.0779471	(0.09613226-0.01450032j)	-20.2449	0.0972197	-8.57767	-0.149709	(0.1096296-0.02202983j)	-19.0295	0.111821	-11.3621	-0.198307	(0.1267226-0.001786176j)	-17.9421	0.126735	-0.80754	-0.0140942	(0.1175595+0.01028899j)	-18.5617	0.118009	5.00187
5.1835	(0.09999567+0.00631252j)	-19.9831	0.100195	3.61217	0.0630443	(0.1183659+0.005532364j)	-18.526	0.118495	2.67603	0.0467055	(0.1091798-0.004482077j)	-19.2298	0.109272	-2.3508	-0.0410292	(0.09534232-0.006718145j)	-20.3928	0.0955787	-4.03059	-0.0703471	(0.1072774+0.003315458j)	-19.3857	0.107329	1.77019	0.0308956	(0.1138085-0.009284345j)	-18.8477	0.114187	-4.66379	-0.0813984	(0.09673983-0.01213599j)	-20.2201	0.0974981	-7.15039	-0.124798	(0.111349-0.02145035j)	-18.908	0.113396	-10.9039	-0.190309	(0.1281987-0.001265245j)	-17.8419	0.128205	-0.565457	-0.00986909	(0.1192854+0.01021719j)	-18.4365	0.119722	4.89562
5.184	(0.1014048+0.007752752j)	-19.8535	0.101701	4.37196	0.0763051	(0.1200774+0.006841605j)	-18.3967	0.120272	3.26099	0.0569151	(0.1113938-0.002854965j)	-19.0599	0.11143	-1.46814	-0.0256239	(0.09826809-0.004759902j)	-20.1416	0.0983833	-2.77312	-0.0484001	(0.1094739+0.005515946j)	-19.2028	0.109613	2.88446	0.0503434	(0.115546-0.007720644j)	-18.7256	0.115804	-3.82275	-0.0667196	(0.09958289-0.01119851j)	-19.9817	0.100211	-6.41619	-0.111984	(0.1133949-0.01953543j)	-18.7811	0.115065	-9.77484	-0.170603	(0.1302191-0.0008849878j)	-17.7063	0.130222	-0.389384	-0.00679604	(0.1217972+0.01107915j)	-18.2515	0.1223	5.19754
5.1845	(0.1031434+0.009769655j)	-19.6924	0.103605	5.41086	0.0944374	(0.1212743+0.008249679j)	-18.3046	0.121555	3.89155	0.0679203	(0.1117514-0.001781818j)	-19.0338	0.111766	-0.913474	-0.0159431	(0.09953202-0.003650535j)	-20.0349	0.0995989	-2.1005	-0.0366606	(0.1105684+0.00621247j)	-19.1137	0.110743	3.21588	0.0561277	(0.1165886-0.005155533j)	-18.6584	0.116703	-2.53196	-0.0441911	(0.1006603-0.009594265j)	-19.9036	0.101116	-5.4446	-0.0950262	(0.1135126-0.01890293j)	-18.7803	0.115076	-9.45454	-0.165013	(0.1308514+0.001089474j)	-17.6641	0.130856	0.477036	0.00832585	(0.1238601+0.0131529j)	-18.0927	0.124557	6.06161
5.185	(0.1048607+0.01119339j)	-19.5385	0.105456	6.09298	0.106343	(0.1229214+0.00913305j)	-18.1835	0.12326	4.24926	0.0741636	(0.1140289-0.001120383j)	-18.8593	0.114034	-0.562938	-0.00982511	(0.1010367-0.003070954j)	-19.9064	0.101083	-1.74094	-0.0303851	(0.1121072+0.006432751j)	-18.9931	0.112292	3.28405	0.0573175	(0.1195012-0.004451675j)	-18.4465	0.119584	-2.1334	-0.0372349	(0.1027744-0.007530874j)	-19.739	0.10305	-4.1909	-0.0731451	(0.1164615-0.01690337j)	-18.5858	0.117682	-8.25831	-0.144135	(0.1331261+0.001658533j)	-17.5141	0.133136	0.713775	0.0124577	(0.125404+0.01530375j)	-17.9696	0.126334	6.95772
5.1855	(0.1071253+0.01109236j)	-19.3558	0.107698	5.91166	0.103178	(0.1259034+0.01001757j)	-17.9718	0.126301	4.54919	0.0793983	(0.1156565-0.00025947920000000003j)	-18.7366	0.115657	-0.128545	-0.00224353	(0.1023266-0.001619572j)	-19.7991	0.102339	-0.906772	-0.0158262	(0.1137791+0.008401202j)	-18.8551	0.114089	4.22293	0.0737041	(0.1207295-0.00407589j)	-18.3588	0.120798	-1.9336	-0.0337477	(0.1037278-0.007450689j)	-19.6597	0.103995	-4.10846	-0.0717061	(0.1169409-0.01574685j)	-18.5626	0.117996	-7.66912	-0.133851	(0.1343048+0.002423338j)	-17.4368	0.134327	1.03371	0.0180416	(0.1276497+0.01475755j)	-17.8219	0.1285	6.59467
5.186	(0.1090772+0.01308107j)	-19.1833	0.109859	6.83853	0.119355	(0.1267117+0.01019183j)	-17.9157	0.127121	4.59858	0.0802604	(0.1184662+0.001637791j)	-18.5273	0.118478	0.792062	0.0138241	(0.1042013+0.00019328310000000007j)	-19.6425	0.104201	0.106278	0.0018549	(0.1163323+0.009111384j)	-18.6594	0.116689	4.47838	0.0781625	(0.121234-0.003364389j)	-18.3242	0.121281	-1.58962	-0.0277441	(0.106732-0.006361912j)	-19.4187	0.106921	-3.41116	-0.059536	(0.118845-0.01437736j)	-18.4373	0.119711	-6.89788	-0.120391	(0.1364996+0.003459061j)	-17.2946	0.136543	1.45163	0.0253358	(0.1291369+0.01614103j)	-17.7117	0.130142	7.12454
5.1865	(0.1103529+0.01443321j)	-19.0707	0.111293	7.4515	0.130053	(0.1274798+0.01151537j)	-17.8559	0.127999	5.16157	0.0900864	(0.1175222+0.003517696j)	-18.5937	0.117575	1.71448	0.0299232	(0.1041674+0.001638459j)	-19.6443	0.10418	0.901136	0.0157278	(0.1160933+0.01056107j)	-18.6681	0.116573	5.19792	0.0907208	(0.1215864-0.001509767j)	-18.3016	0.121596	-0.711419	-0.0124166	(0.1056183-0.005390965j)	-19.5139	0.105756	-2.92195	-0.0509977	(0.1178542-0.01358767j)	-18.5158	0.118635	-6.57672	-0.114785	(0.1358341+0.004431788j)	-17.3352	0.135906	1.8687	0.0326149	(0.1291444+0.01694597j)	-17.7043	0.130251	7.47548
5.187	(0.1105649+0.01639366j)	-19.0332	0.111774	8.4339	0.147199	(0.1285906+0.01431536j)	-17.7623	0.129385	6.3523	0.110869	(0.1191152+0.004338637j)	-18.4749	0.119194	2.08601	0.0364078	(0.10605+0.003510775j)	-19.485	0.106108	1.89608	0.0330928	(0.1170124+0.01309648j)	-18.5813	0.117743	6.38619	0.11146	(0.1231475+0.0011187659999999998j)	-18.1911	0.123153	0.520504	0.00908451	(0.1071223-0.001953782j)	-19.401	0.10714	-1.04489	-0.0182368	(0.1197363-0.01160968j)	-18.3948	0.120298	-5.53811	-0.0966583	(0.1390241+0.006153377j)	-17.1297	0.13916	2.53433	0.0442324	(0.1312389+0.01869527j)	-17.5515	0.132564	8.10736
5.1875	(0.1115442+0.01922231j)	-18.924	0.113188	9.77769	0.170653	(0.1300626+0.01609063j)	-17.651	0.131054	7.05248	0.123089	(0.1202867+0.006890696j)	-18.3814	0.120484	3.27864	0.0572231	(0.1063844+0.005447131j)	-19.4511	0.106524	2.93112	0.0511577	(0.1189441+0.01464252j)	-18.4278	0.119842	7.01804	0.122488	(0.1244063+0.002084282j)	-18.1019	0.124424	0.959834	0.0167523	(0.1077733+0.00040130409999999993j)	-19.3497	0.107774	0.213345	0.00372358	(0.1201959-0.008655172j)	-18.3797	0.120507	-4.1187	-0.0718848	(0.1382671+0.007102538j)	-17.1742	0.138449	2.9406	0.0513231	(0.1332431+0.02109024j)	-17.3996	0.134902	8.99438
5.188	(0.1125757+0.01991484j)	-18.8373	0.114324	10.0319	0.17509	(0.1306595+0.01730064j)	-17.6017	0.1318	7.54266	0.131644	(0.1200341+0.008316129j)	-18.3931	0.120322	3.9632	0.0691709	(0.1078074+0.006314604j)	-19.3322	0.107992	3.35216	0.0585062	(0.1184896+0.01686601j)	-18.4393	0.119684	8.10116	0.141392	(0.1245936+0.00402744j)	-18.0855	0.124659	1.85142	0.0323134	(0.1084381+0.001651042j)	-19.2954	0.108451	0.872299	0.0152245	(0.1208168-0.006735087j)	-18.344	0.121004	-3.19072	-0.0556886	(0.1396018+0.009762363j)	-17.081	0.139943	4.00019	0.0698164	(0.1324335+0.02188783j)	-17.443	0.13423	9.38467
5.1885	(0.1127487+0.02186536j)	-18.7974	0.114849	10.9751	0.191552	(0.1304112+0.01861829j)	-17.6061	0.131734	8.12499	0.141808	(0.1197047+0.008930255j)	-18.4137	0.120037	4.2665	0.0744644	(0.107091+0.008870453j)	-19.3752	0.107458	4.73506	0.0826423	(0.1187843+0.01889751j)	-18.3963	0.120278	9.03949	0.157769	(0.1238423+0.005664705j)	-18.1335	0.123972	2.61896	0.0457094	(0.1079915+0.002961272j)	-19.3289	0.108032	1.57073	0.0274145	(0.1198918-0.006083752j)	-18.413	0.120046	-2.90491	-0.0507002	(0.1386729+0.01093971j)	-17.1332	0.139104	4.51064	0.0787255	(0.1331054+0.02426431j)	-17.3741	0.135299	10.3312
5.189	(0.1127762+0.02386525j)	-18.7654	0.115274	11.9484	0.208539	(0.1307038+0.0206006j)	-17.5677	0.132317	8.95687	0.156327	(0.1200205+0.01216891j)	-18.3705	0.120636	5.78945	0.101045	(0.1066077+0.01268953j)	-19.3831	0.10736	6.78799	0.118473	(0.1193939+0.02087336j)	-18.3296	0.121205	9.91667	0.173078	(0.1234139+0.007685764j)	-18.1559	0.123653	3.56357	0.062196	(0.1079595+0.00529631j)	-19.3243	0.108089	2.80858	0.049019	(0.1193041-0.003357971j)	-18.4635	0.119351	-1.61224	-0.0281389	(0.1386169+0.0122095j)	-17.1301	0.139154	5.03367	0.0878542	(0.1326846+0.02671851j)	-17.371	0.135348	11.3853
5.1895	(0.1154828+0.02765805j)	-18.5074	0.118749	13.4686	0.235071	(0.1323286+0.02458471j)	-17.4196	0.134593	10.5247	0.183691	(0.1215127+0.01596816j)	-18.2332	0.122557	7.48642	0.130663	(0.1081797+0.01554643j)	-19.2283	0.109291	8.17795	0.142732	(0.1209793+0.02470081j)	-18.1684	0.123475	11.5397	0.201406	(0.1257522+0.01073145j)	-17.9782	0.126209	4.87769	0.0851318	(0.1103388+0.008221111j)	-19.1214	0.110645	4.26111	0.0743705	(0.1209825-0.0004422667j)	-18.3455	0.120983	-0.209451	-0.00365561	(0.1406426+0.0171368j)	-16.9737	0.141683	6.94704	0.121249	(0.133715+0.02955962j)	-17.2692	0.136943	12.4656
5.19	(0.1130255+0.02852814j)	-18.6682	0.11657	14.1658	0.24724	(0.1320493+0.02443657j)	-17.439	0.134291	10.4843	0.182986	(0.1201611+0.01601554j)	-18.3282	0.121224	7.59186	0.132503	(0.107019+0.0166929j)	-19.3064	0.108313	8.8656	0.154734	(0.1197303+0.02421436j)	-18.2618	0.122154	11.4333	0.199549	(0.1249039+0.01004389j)	-18.0405	0.125307	4.59743	0.0802403	(0.1082594+0.01019723j)	-19.2723	0.108739	5.38096	0.0939155	(0.1195331+0.0005347634999999999j)	-18.4501	0.119534	0.256326	0.00447374	(0.1393141+0.01650047j)	-17.0596	0.140288	6.75469	0.117892	(0.1344459+0.03058705j)	-17.2099	0.137881	12.8169
5.1905	(0.1121999+0.03102576j)	-18.6802	0.116411	15.4573	0.269781	(0.1304124+0.02709521j)	-17.5101	0.133197	11.7371	0.204851	(0.1186872+0.01833434j)	-18.4095	0.120095	8.78142	0.153265	(0.1058698+0.01816181j)	-19.3786	0.107416	9.73426	0.169895	(0.1184898+0.02716857j)	-18.3039	0.121565	12.9141	0.225394	(0.1228097+0.01280824j)	-18.1684	0.123476	5.95405	0.103918	(0.1071174+0.01154662j)	-19.3526	0.107738	6.15239	0.107379	(0.1198281+0.002588813j)	-18.4268	0.119856	1.23765	0.021601	(0.1385054+0.01855498j)	-17.0934	0.139743	7.63024	0.133173	(0.1323405+0.03159362j)	-17.3254	0.136059	13.4269
5.191	(0.1121398+0.03198743j)	-18.6651	0.116613	15.9206	0.277867	(0.1307995+0.02834504j)	-17.4686	0.133836	12.2273	0.213406	(0.1191618+0.02039089j)	-18.3519	0.120894	9.71037	0.169478	(0.1057247+0.02073593j)	-19.3525	0.107739	11.0966	0.193673	(0.1192609+0.02881346j)	-18.2237	0.122692	13.5824	0.237058	(0.1227368+0.01428527j)	-18.1621	0.123565	6.63876	0.115868	(0.1067834+0.01410333j)	-19.3548	0.107711	7.52375	0.131314	(0.1180751+0.004309862j)	-18.5511	0.118154	2.09043	0.0364848	(0.1376711+0.0200349j)	-17.1321	0.139121	8.27997	0.144513	(0.1327619+0.03380775j)	-17.2657	0.136999	14.2867
5.1915	(0.1099776+0.03579603j)	-18.7366	0.115657	18.0293	0.31467	(0.1283065+0.03143388j)	-17.5819	0.132101	13.7658	0.240258	(0.116638+0.02330308j)	-18.4932	0.118943	11.2984	0.197193	(0.10416+0.02391857j)	-19.4228	0.106871	12.9328	0.22572	(0.1169077+0.03228042j)	-18.324	0.121282	15.4358	0.269406	(0.1212661+0.0185528j)	-18.2247	0.122677	8.69837	0.151815	(0.1040488+0.01747091j)	-19.5345	0.105505	9.53166	0.166359	(0.1168913+0.006618985j)	-18.6305	0.117079	3.24092	0.0565647	(0.1353765+0.02245556j)	-17.2513	0.137226	9.41818	0.164378	(0.1303627+0.03717922j)	-17.3573	0.135561	15.9181
5.192	(0.1093197+0.0379739j)	-18.7313	0.115727	19.1555	0.334326	(0.1274198+0.03318825j)	-17.6102	0.131671	14.5991	0.254802	(0.115337+0.0249239j)	-18.5624	0.117999	12.1939	0.212824	(0.1023161+0.0261768j)	-19.5258	0.105612	14.3509	0.25047	(0.1152329+0.03427155j)	-18.4004	0.120221	16.5631	0.28908	(0.1187149+0.02002416j)	-18.3881	0.120392	9.57421	0.167101	(0.1034393+0.01948134j)	-19.5549	0.105258	10.6659	0.186155	(0.1142421+0.009064214j)	-18.8162	0.114601	4.53647	0.0791763	(0.1343571+0.02491835j)	-17.2879	0.136648	10.5069	0.18338	(0.1297243+0.03810241j)	-17.3802	0.135204	16.3685
5.1925	(0.1082371+0.03979767j)	-18.7618	0.115322	20.188	0.352346	(0.1250798+0.0338511j)	-17.7493	0.12958	15.1435	0.264305	(0.11347+0.02616904j)	-18.6773	0.116449	12.9868	0.226662	(0.100602+0.0269239j)	-19.6474	0.104142	14.9828	0.2615	(0.1141828+0.03581045j)	-18.4405	0.119667	17.4127	0.303908	(0.1176899+0.02087049j)	-18.4507	0.119526	10.056	0.17551	(0.1023644+0.02067144j)	-19.6234	0.104431	11.4168	0.19926	(0.1134055+0.01009584j)	-18.873	0.113854	5.0873	0.0887902	(0.1342687+0.02565922j)	-17.2847	0.136698	10.819	0.188827	(0.1279411+0.03853996j)	-17.4826	0.13362	16.764
5.193	(0.1053898+0.0397061j)	-18.9676	0.112621	20.6441	0.360308	(0.1232828+0.03492208j)	-17.8467	0.128134	15.8157	0.276037	(0.110439+0.02798901j)	-18.8672	0.11393	14.2213	0.248208	(0.09917617+0.02801606j)	-19.7384	0.103057	15.7743	0.275314	(0.1109216+0.03620305j)	-18.6601	0.11668	18.0759	0.315483	(0.1158558+0.02186597j)	-18.5696	0.117901	10.688	0.18654	(0.09848855+0.02154152j)	-19.9293	0.100817	12.3375	0.21533	(0.1098365+0.01207236j)	-19.1329	0.110498	6.27232	0.109473	(0.1307948+0.02638959j)	-17.4949	0.13343	11.407	0.19909	(0.1254943+0.04009915j)	-17.6053	0.131745	17.7202
5.1935	(0.1047068+0.04224192j)	-18.9456	0.112907	21.9707	0.38346	(0.121906+0.03692396j)	-17.8983	0.127375	16.851	0.294105	(0.110056+0.02915392j)	-18.8732	0.113852	14.8369	0.258953	(0.09731411+0.03106925j)	-19.8149	0.102153	17.7066	0.309039	(0.1109791+0.0380463j)	-18.6126	0.11732	18.9229	0.330268	(0.1138076+0.02408273j)	-18.6863	0.116328	11.9481	0.208533	(0.09813344+0.02357396j)	-19.92	0.100925	13.5078	0.235756	(0.1084749+0.0137959j)	-19.2237	0.109349	7.248	0.126501	(0.1303939+0.02796191j)	-17.4996	0.133358	12.1033	0.211243	(0.1250694+0.04208151j)	-17.5912	0.131959	18.5963
5.194	(0.1030001+0.0430531j)	-19.0439	0.111636	22.6845	0.395919	(0.1201291+0.03773974j)	-17.9983	0.125918	17.4406	0.304396	(0.1068064+0.02989271j)	-19.1005	0.110911	15.6357	0.272895	(0.09489635+0.03138707j)	-20.0041	0.0999523	18.3017	0.319425	(0.1086521+0.03991023j)	-18.7296	0.11575	20.1694	0.352022	(0.1113303+0.02550578j)	-18.8456	0.114215	12.9038	0.225214	(0.09494861+0.02451855j)	-20.1699	0.0980632	14.4792	0.252709	(0.1059247+0.01493343j)	-19.4146	0.106972	8.02476	0.140059	(0.1274208+0.02863979j)	-17.6812	0.1306	12.6676	0.221091	(0.1222592+0.04347635j)	-17.7372	0.129759	19.5758
5.1945	(0.1007319+0.04453976j)	-19.1611	0.110139	23.8532	0.416316	(0.1188697+0.039704j)	-18.0392	0.125325	18.47	0.322362	(0.1060433+0.03228021j)	-19.1055	0.110848	16.9306	0.295494	(0.09430587+0.03365925j)	-19.9885	0.100133	19.6423	0.342823	(0.1068273+0.04079074j)	-18.8353	0.11435	20.8988	0.364752	(0.1095522+0.02639704j)	-18.9625	0.112688	13.5474	0.236447	(0.09409112+0.02710473j)	-20.1828	0.0979173	16.07	0.280475	(0.1047419+0.01599695j)	-19.4975	0.105956	8.68353	0.151556	(0.1253784+0.02952639j)	-17.8011	0.128808	13.2516	0.231284	(0.1224957+0.04483711j)	-17.6915	0.130444	20.1041
5.195	(0.09911514+0.04565176j)	-19.2417	0.109123	24.7305	0.431628	(0.1154178+0.03999983j)	-18.2619	0.122153	19.1146	0.333612	(0.1042284+0.03292293j)	-19.2272	0.109305	17.5299	0.305955	(0.08906741+0.03521666j)	-20.3748	0.0957769	21.5735	0.376529	(0.1042594+0.04155732j)	-18.9973	0.112237	21.732	0.379295	(0.1081232+0.02740323j)	-19.0513	0.111542	14.2218	0.248218	(0.09119593+0.02707276j)	-20.4337	0.0951296	16.5342	0.288577	(0.1010175+0.01635566j)	-19.7997	0.102333	9.1969	0.160516	(0.1223629+0.03154838j)	-17.9675	0.126364	14.4575	0.252331	(0.1187006+0.04528358j)	-17.9208	0.127045	20.8816
5.1955	(0.09510542+0.04675055j)	-19.4959	0.105975	26.1771	0.456877	(0.1122364+0.04114638j)	-18.4497	0.119541	20.1332	0.35139	(0.1000974+0.03341701j)	-19.5326	0.105528	18.4613	0.322211	(0.08735942+0.03561561j)	-20.506	0.0943406	22.1803	0.387119	(0.101216+0.0420972j)	-19.2021	0.109621	22.5831	0.39415	(0.103777+0.02826526j)	-19.3672	0.107557	15.2358	0.265915	(0.08845973+0.02874633j)	-20.6291	0.0930133	18.0024	0.3142	(0.0985944+0.01691079j)	-19.997	0.100034	9.7326	0.169866	(0.1197897+0.03141702j)	-18.1427	0.123841	14.6959	0.256491	(0.1153528+0.04477492j)	-18.1499	0.123738	21.214
5.196	(0.09274986+0.04695382j)	-19.6629	0.103958	26.8504	0.468628	(0.1094841+0.04023158j)	-18.6629	0.116642	20.1766	0.352148	(0.09753012+0.03366707j)	-19.7283	0.103177	19.0445	0.332389	(0.08493181+0.03627399j)	-20.6909	0.0923537	23.1271	0.403644	(0.09864382+0.04290065j)	-19.3663	0.107569	23.5044	0.41023	(0.1015569+0.02848802j)	-19.5369	0.105477	15.6695	0.273484	(0.08905315+0.0267636j)	-20.6315	0.0929879	16.7274	0.291948	(0.09478272+0.01743406j)	-20.3209	0.0963728	10.4223	0.181904	(0.1168184+0.03157922j)	-18.3435	0.121012	15.1271	0.264017	(0.1124239+0.04654212j)	-18.2958	0.121677	22.489
5.1965	(0.09039511+0.04751479j)	-19.8176	0.102122	27.728	0.483944	(0.1072735+0.04053294j)	-18.8106	0.114676	20.6989	0.361264	(0.09485105+0.03397999j)	-19.9348	0.100754	19.7098	0.344002	(0.08218357+0.03605825j)	-20.9397	0.089746	23.6896	0.413461	(0.09635169+0.04266748j)	-19.5451	0.105376	23.8852	0.416876	(0.09808997+0.02867471j)	-19.8114	0.102195	16.2953	0.284406	(0.08642902+0.02819581j)	-20.8276	0.0909119	18.0679	0.315345	(0.09191162+0.01828022j)	-20.5641	0.0937119	11.2487	0.196327	(0.1141534+0.0312614j)	-18.5362	0.118357	15.3152	0.267301	(0.1103721+0.04533375j)	-18.4658	0.11932	22.3297
5.197	(0.08761624+0.04596293j)	-20.0925	0.0989404	27.6812	0.483128	(0.1036381+0.04098273j)	-19.0586	0.111447	21.5759	0.37657	(0.09306082+0.03247347j)	-20.1256	0.0985639	19.2364	0.335738	(0.08010384+0.03670187j)	-21.0993	0.0881116	24.6162	0.429634	(0.09358383+0.04266865j)	-19.7557	0.102852	24.5102	0.427783	(0.09624567+0.02835796j)	-19.9708	0.100336	16.4172	0.286533	(0.08377389+0.027621j)	-21.0897	0.0882099	18.2478	0.318485	(0.09034378+0.01827613j)	-20.7078	0.0921738	11.4363	0.199602	(0.1112058+0.03095851j)	-18.7533	0.115435	15.5566	0.271515	(0.1079491+0.04432035j)	-18.6591	0.116693	22.3214
5.1975	(0.0852133+0.04782111j)	-20.2008	0.0977147	29.3008	0.511396	(0.1024678+0.04006231j)	-19.1705	0.110021	21.3542	0.372702	(0.08985633+0.03452921j)	-20.3309	0.0962623	21.0203	0.366874	(0.07767984+0.03697276j)	-21.307	0.0860299	25.4527	0.444234	(0.09124891+0.04323684j)	-19.9158	0.100974	25.3532	0.442497	(0.0929298+0.02878707j)	-20.239	0.0972864	17.2115	0.300398	(0.08084324+0.02773152j)	-21.364	0.0854673	18.9334	0.330451	(0.08711548+0.01722073j)	-21.0316	0.0888012	11.1819	0.195161	(0.1086453+0.0309822j)	-18.9402	0.112977	15.9165	0.277795	(0.1047809+0.04544029j)	-18.8459	0.11421	23.4449
5.198	(0.08346666+0.0468493j)	-20.3803	0.0957159	29.3052	0.511473	(0.1001393+0.04021645j)	-19.3385	0.107913	21.8806	0.381889	(0.0873184+0.03336651j)	-20.586	0.0934763	20.9131	0.365002	(0.07421922+0.0368955j)	-21.6306	0.0828841	26.4327	0.461337	(0.08848438+0.04249934j)	-20.1612	0.0981615	25.6551	0.447766	(0.090743+0.02887923j)	-20.4247	0.0952276	17.6538	0.308117	(0.07781863+0.02804088j)	-21.6482	0.0827166	19.8159	0.345853	(0.08344745+0.01739421j)	-21.387	0.085241	11.7744	0.205502	(0.1055206+0.0303161j)	-19.1888	0.109789	16.0294	0.279765	(0.1033283+0.0443879j)	-18.9801	0.112459	23.2475
5.1985	(0.07999826+0.04761168j)	-20.6215	0.0930945	30.7594	0.536852	(0.09697867+0.04080296j)	-19.5586	0.105213	22.8185	0.398258	(0.0834583+0.0337358j)	-20.9133	0.0900188	22.0097	0.384142	(0.07105021+0.03685994j)	-21.9336	0.0800424	27.4197	0.478564	(0.08615135+0.04281865j)	-20.336	0.0962055	26.4281	0.461258	(0.08800832+0.02858074j)	-20.6741	0.0925328	17.9912	0.314006	(0.07533158+0.02884519j)	-21.8663	0.0806653	20.9523	0.365687	(0.08081691+0.01914158j)	-21.6129	0.0830528	13.325	0.232566	(0.1031941+0.03085249j)	-19.3551	0.107707	16.6454	0.290516	(0.09898654+0.04511095j)	-19.2689	0.108781	24.5001
5.199	(0.07704313+0.0467307j)	-20.9048	0.0901077	31.239	0.545224	(0.0936362+0.03942774j)	-19.8622	0.101599	22.8347	0.39854	(0.08121777+0.03329405j)	-21.1324	0.0877771	22.2905	0.389042	(0.0674748+0.03633201j)	-22.3115	0.0766346	28.3004	0.493935	(0.08160311+0.04226054j)	-20.734	0.0918968	27.3787	0.477848	(0.08437181+0.02813165j)	-21.0182	0.0889381	18.4397	0.321833	(0.07197659+0.02725377j)	-22.2743	0.0769636	20.7391	0.361965	(0.07667282+0.01721208j)	-22.0936	0.078581	12.6524	0.220826	(0.09962655+0.02893492j)	-19.6808	0.103743	16.1951	0.282658	(0.09746315+0.04380488j)	-19.4241	0.106855	24.2016
5.1995	(0.07379775+0.04419464j)	-21.3081	0.086019	30.9158	0.539582	(0.09143542+0.03774819j)	-20.0942	0.098921	22.4328	0.391526	(0.07823946+0.03095859j)	-21.4998	0.0841418	21.5882	0.376786	(0.06570276+0.03592181j)	-22.5125	0.0748814	28.6668	0.500331	(0.07932027+0.03932935j)	-21.0577	0.0885353	26.3736	0.460306	(0.08221506+0.02592276j)	-21.2893	0.086205	17.5003	0.305438	(0.06867487+0.02591608j)	-22.6858	0.0734022	20.6752	0.36085	(0.07441156+0.01584519j)	-22.3746	0.0760799	12.021	0.209806	(0.09703771+0.02720302j)	-19.9326	0.100779	15.66	0.273319	(0.09480037+0.04258707j)	-19.6655	0.103927	24.191
5.2	(0.07175293+0.04380993j)	-21.5072	0.0840702	31.4068	0.548153	(0.08741945+0.03632641j)	-20.4761	0.0946666	22.5649	0.393832	(0.07565204+0.02989853j)	-21.7933	0.0813459	21.5645	0.376371	(0.0610696+0.03276248j)	-23.185	0.0693028	28.2126	0.492402	(0.07662275+0.03906941j)	-21.3092	0.0860085	27.0167	0.471531	(0.07673025+0.02374574j)	-21.9035	0.0803206	17.1957	0.300122	(0.06590362+0.02486067j)	-23.044	0.0704368	20.6679	0.360722	(0.07034338+0.01448428j)	-22.8752	0.0718191	11.6351	0.20307	(0.09433225+0.02592717j)	-20.1905	0.0978304	15.3682	0.268226	(0.09009632+0.04000529j)	-20.1243	0.0985788	23.9426
5.2005	(0.06912784+0.04180481j)	-21.8533	0.0807855	31.1633	0.543902	(0.08567288+0.03385105j)	-20.7131	0.0921181	21.56	0.376292	(0.07121377+0.02844146j)	-22.306	0.0766832	21.7709	0.379973	(0.05944291+0.03126637j)	-23.4572	0.0671643	27.7439	0.484223	(0.0746778+0.03683457j)	-21.5904	0.083268	26.2547	0.45823	(0.07578835+0.02332234j)	-22.015	0.0792957	17.1047	0.298533	(0.06405278+0.02354442j)	-23.3188	0.0682429	20.1823	0.352248	(0.06820458+0.0131078j)	-23.1662	0.0694527	10.8787	0.189869	(0.0920978+0.02361638j)	-20.4384	0.0950775	14.3823	0.251019	(0.0885009+0.03887214j)	-20.2949	0.0966615	23.7125
5.201	(0.06729921+0.04069162j)	-22.0866	0.0786447	31.1587	0.543822	(0.08301888+0.03282107j)	-20.9858	0.0892713	21.5711	0.376487	(0.06991436+0.02635095j)	-22.5318	0.0747154	20.6516	0.360438	(0.05802328+0.03083761j)	-23.6475	0.0657089	27.9893	0.488505	(0.07271177+0.03502755j)	-21.8616	0.0807089	25.7216	0.448926	(0.07388727+0.02096545j)	-22.2923	0.0768042	15.8412	0.276482	(0.06213382+0.02122189j)	-23.6542	0.0656581	18.8577	0.329128	(0.06679171+0.01012211j)	-23.4069	0.0675543	8.61745	0.150403	(0.08906808+0.02174931j)	-20.754	0.0916851	13.7224	0.239501	(0.08733784+0.0357371j)	-20.5036	0.0943665	22.2535
5.2015	(0.06475493+0.03838073j)	-22.467	0.0752747	30.6555	0.53504	(0.07884938+0.02991669j)	-21.4799	0.0843341	20.7775	0.362636	(0.06681728+0.02420142j)	-22.9669	0.0710652	19.9105	0.347504	(0.05446039+0.02817183j)	-24.2486	0.0613155	27.3521	0.477384	(0.06874536+0.03296302j)	-22.3564	0.0762397	25.6175	0.447109	(0.06964216+0.01943111j)	-22.817	0.0723021	15.5898	0.272094	(0.05814976+0.01941498j)	-24.25	0.0613053	18.4631	0.322242	(0.06292816+0.008154457j)	-23.9508	0.0634543	7.38345	0.128865	(0.08565408+0.02046216j)	-21.104	0.0880643	13.4357	0.234498	(0.08332066+0.03354476j)	-20.9326	0.0898197	21.9296
5.202	(0.06175203+0.03696433j)	-22.857	0.07197	30.9044	0.539384	(0.07852773+0.02845548j)	-21.5637	0.0835244	19.9186	0.347645	(0.0651933+0.02245063j)	-23.2292	0.0689507	19.0022	0.331651	(0.052405+0.02775496j)	-24.5387	0.0593011	27.9068	0.487065	(0.06698576+0.0322816j)	-22.5734	0.0743585	25.7302	0.449077	(0.06844082+0.01753954j)	-23.0174	0.0706525	14.374	0.250874	(0.05674179+0.01852231j)	-24.4822	0.0596884	18.0783	0.315526	(0.05891096+0.007368191j)	-24.5287	0.05937	7.12915	0.124427	(0.08406464+0.01833277j)	-21.3059	0.0860404	12.3024	0.214718	(0.08163169+0.03193765j)	-21.1443	0.087657	21.3675
5.2025	(0.06045981+0.03451064j)	-23.1458	0.0696159	29.7179	0.518674	(0.07587229+0.02588786j)	-21.9201	0.0801672	18.8398	0.328817	(0.06247336+0.01997644j)	-23.6633	0.0655895	17.7322	0.309485	(0.04886672+0.02469587j)	-25.2319	0.0547526	26.8108	0.467936	(0.06498566+0.02942036j)	-22.9339	0.0713351	24.3573	0.425114	(0.06543416+0.01423068j)	-23.4832	0.0669637	12.2697	0.214146	(0.05304438+0.01612504j)	-25.1234	0.0554412	16.9088	0.295115	(0.05784246+0.004703795j)	-24.7264	0.0580334	4.64911	0.0811422	(0.08133107+0.01580385j)	-21.6339	0.0828523	10.9964	0.191923	(0.07982661+0.02950205j)	-21.401	0.0851038	20.2831
5.203	(0.05660547+0.03201975j)	-23.7372	0.0650342	29.4953	0.514791	(0.07229614+0.02281212j)	-22.4055	0.0758098	17.5124	0.305649	(0.05869249+0.01790353j)	-24.242	0.0613624	16.9638	0.296074	(0.04676189+0.02230637j)	-25.7118	0.0518097	25.5021	0.445095	(0.06185874+0.026767j)	-23.4266	0.0674016	23.3987	0.408384	(0.06276807+0.01285503j)	-23.8668	0.0640709	11.5742	0.202009	(0.0497045+0.01372632j)	-25.7529	0.051565	15.4379	0.269443	(0.05422961+0.002991766j)	-25.3021	0.0543121	3.15772	0.0551126	(0.07809422+0.0120104j)	-22.0461	0.0790124	8.74323	0.152598	(0.07728202+0.02584122j)	-21.7781	0.0814879	18.4887
5.2035	(0.05554562+0.02908942j)	-24.0544	0.0627018	27.6412	0.48243	(0.06998625+0.0200814j)	-22.7561	0.0728103	16.01	0.279426	(0.05814302+0.01493257j)	-24.4326	0.0600299	14.4037	0.251392	(0.04513171+0.02002387j)	-26.13	0.0493744	23.9257	0.417583	(0.05965007+0.02323076j)	-23.8745	0.0640141	21.2785	0.371379	(0.05998012+0.009810863j)	-24.3252	0.0607772	9.28953	0.162133	(0.04799555+0.01116567j)	-26.1471	0.0492772	13.0963	0.228574	(0.05253794-0.00040452710000000005j)	-25.5903	0.0525395	-0.441152	-0.00769956	(0.07636857+0.01011837j)	-22.2661	0.077036	7.54738	0.131727	(0.0748103+0.02335845j)	-22.1168	0.0783722	17.3402
5.204	(0.05455823+0.02604316j)	-24.3713	0.0604553	25.5173	0.445361	(0.06941116+0.01770837j)	-22.8976	0.0716345	14.3122	0.249794	(0.05682296+0.01167702j)	-24.7299	0.0580104	11.6125	0.202677	(0.04459232+0.01734281j)	-26.4031	0.0478461	21.252	0.370918	(0.05937346+0.02047945j)	-24.04	0.0628062	19.0306	0.332147	(0.05934407+0.007615988j)	-24.4615	0.0598308	7.31314	0.127638	(0.04612162+0.007571027j)	-26.6064	0.0467389	9.32217	0.162702	(0.05081547-0.002398406j)	-25.8704	0.050872	-2.70226	-0.0471633	(0.07491194+0.006165829j)	-22.4797	0.0751653	4.70528	0.0821226	(0.07332609+0.02002492j)	-22.3824	0.0760113	15.2747
5.2045	(0.05197924+0.02351186j)	-24.875	0.0570495	24.3387	0.424791	(0.06630824+0.01348187j)	-23.3927	0.0676649	11.4928	0.200587	(0.05306177+0.009019358j)	-25.3807	0.0538229	9.64685	0.168369	(0.04152614+0.01421161j)	-27.1526	0.0438907	18.8926	0.329739	(0.05581152+0.01755686j)	-24.6557	0.0585079	17.4622	0.304773	(0.05727975+0.0033911209999999995j)	-24.8248	0.05738	3.38812	0.0591338	(0.04487381+0.005224228j)	-26.9017	0.0451769	6.64051	0.115899	(0.04863163-0.005970242j)	-26.1967	0.0489967	-6.99887	-0.122153	(0.0717827+0.003264569j)	-22.8706	0.0718569	2.60393	0.0454472	(0.07118058+0.0174697j)	-22.6987	0.073293	13.7894
5.205	(0.05095061+0.0204952j)	-25.2057	0.0549183	21.9128	0.38245	(0.06546807+0.009793962j)	-23.5833	0.0661966	8.5083	0.148498	(0.0527112+0.006835175j)	-25.4895	0.0531525	7.38844	0.128953	(0.03999892+0.01354997j)	-27.4872	0.0422317	18.7142	0.326625	(0.05526723+0.01517852j)	-24.8348	0.0573136	15.357	0.26803	(0.05564061+0.00034838890000000013j)	-25.092	0.0556417	0.358748	0.00626133	(0.04419442+0.002784427j)	-27.0754	0.044282	3.6051	0.0629209	(0.04684887-0.009002853j)	-26.4285	0.0477061	-10.8778	-0.189854	(0.07099187+0.0007680701000000001j)	-22.9753	0.070996	0.619866	0.0108187	(0.07031949+0.01440405j)	-22.88	0.0717796	11.5762
5.2055	(0.04958085+0.01768814j)	-25.5734	0.0526415	19.634	0.342679	(0.06487025+0.007569174j)	-23.7004	0.0653103	6.65528	0.116157	(0.05226639+0.0025663199999999995j)	-25.6251	0.0523294	2.81101	0.0490614	(0.04013488+0.009620823j)	-27.6869	0.0412719	13.4801	0.235273	(0.05558585+0.01224036j)	-24.8951	0.0569176	12.4187	0.216747	(0.05450574-0.003053346j)	-25.2575	0.0545912	-3.20629	-0.0559603	(0.04209528-0.00041799060000000023j)	-27.5149	0.0420974	-0.568907	-0.0099293	(0.0466088-0.01237077j)	-26.335	0.0482226	-14.8646	-0.259435	(0.06958456-0.0019428549999999998j)	-23.1464	0.0696117	-1.59933	-0.0279135	(0.0693909+0.01093752j)	-23.0674	0.0702476	8.95737
5.206	(0.04990377+0.01395327j)	-25.7104	0.0518178	15.6212	0.272641	(0.06518435+0.003448426j)	-23.705	0.0652755	3.02828	0.0528534	(0.05185597-0.00027944990000000006j)	-25.7039	0.0518567	-0.308762	-0.00538891	(0.04044678+0.006104477j)	-27.7645	0.0409048	8.58266	0.149796	(0.05487552+0.008477723j)	-25.11	0.0555265	8.7822	0.153278	(0.05407787-0.006204593j)	-25.2828	0.0544326	-6.54518	-0.114235	(0.04295538-0.002541089j)	-27.3245	0.0430305	-3.38547	-0.0590876	(0.04718328-0.0147678j)	-26.1184	0.0494404	-17.3795	-0.303329	(0.06966815-0.007551776j)	-23.0886	0.0700762	-6.1865	-0.107975	(0.06950805+0.00778817j)	-23.1051	0.069943	6.39316
5.2065	(0.0485062+0.0101626j)	-26.0975	0.0495594	11.833	0.206524	(0.06351888-6.881626999999998e-05j)	-23.9419	0.0635189	-0.0620741	-0.0010834	(0.05052696-0.003736982j)	-25.9058	0.050665	-4.2299	-0.0738257	(0.03839926+0.002724237j)	-28.2917	0.0384958	4.05805	0.0708264	(0.05422792+0.004885632j)	-25.2804	0.0544476	5.14813	0.0898518	(0.0528585-0.009566096j)	-25.3977	0.0537171	-10.2581	-0.179038	(0.04025333-0.006859733j)	-27.7796	0.0408336	-9.6711	-0.168793	(0.04326298-0.01865764j)	-26.5369	0.0471147	-23.3287	-0.407162	(0.06793896-0.01015297j)	-23.2617	0.0686934	-8.49953	-0.148345	(0.06769776+0.004308032j)	-23.371	0.0678347	3.64118
5.207	(0.04833689+0.007951081j)	-26.1985	0.0489865	9.3411	0.163033	(0.06290279-0.003035231j)	-24.0165	0.062976	-2.76253	-0.0482153	(0.04966339-0.006914348j)	-25.9959	0.0501424	-7.92601	-0.138335	(0.03775591-0.0007131383j)	-28.4588	0.0377626	-1.08208	-0.0188859	(0.05416321+0.001669621j)	-25.3218	0.0541889	1.76563	0.030816	(0.05250424-0.01224321j)	-25.3662	0.0539128	-13.126	-0.229091	(0.04121478-0.00932871j)	-27.482	0.0422573	-12.7536	-0.222593	(0.04414104-0.02101625j)	-26.2158	0.0488888	-25.4599	-0.444358	(0.06840278-0.01327872j)	-23.1379	0.0696797	-10.9859	-0.191741	(0.06810115+0.001568794j)	-23.3346	0.0681192	1.31965
5.2075	(0.04807647+0.00341028j)	-26.3396	0.0481973	4.05745	0.0708159	(0.06247045-0.006480044j)	-24.04	0.0628056	-5.9221	-0.10336	(0.05052971-0.01029382j)	-25.7525	0.0515676	-11.5146	-0.200968	(0.03759454-0.004124491j)	-28.4455	0.0378201	-6.26087	-0.109273	(0.05293045-0.0023778809999999997j)	-25.5171	0.0529838	-2.57226	-0.0448944	(0.05226286-0.0168301j)	-25.2076	0.0549059	-17.85	-0.311541	(0.04010826-0.0133237j)	-27.4807	0.0422634	-18.3761	-0.320724	(0.04371555-0.02437337j)	-26.0117	0.0500511	-29.1416	-0.508617	(0.06744738-0.01786709j)	-23.1262	0.0697738	-14.8371	-0.258956	(0.06728614-0.004080742j)	-23.4255	0.0674098	-3.4706
5.208	(0.0498758+0.0009157078999999999j)	-26.0407	0.0498842	1.05182	0.0183577	(0.06386599-0.009621485j)	-23.7971	0.0645867	-8.56725	-0.149527	(0.04996138-0.01357549j)	-25.7179	0.0517729	-15.2014	-0.265314	(0.03827652-0.006886296j)	-28.203	0.038891	-10.1989	-0.178005	(0.05320624-0.006429083j)	-25.4178	0.0535933	-6.88983	-0.12025	(0.0517718-0.01910423j)	-25.1637	0.0551842	-20.2545	-0.353507	(0.04158234-0.015919j)	-27.0279	0.0445253	-20.9484	-0.365618	(0.04362994-0.02773358j)	-25.7305	0.0516984	-32.4423	-0.566225	(0.06900416-0.02041258j)	-22.8582	0.07196	-16.4791	-0.287614	(0.06870184-0.006733736j)	-23.2191	0.0690311	-5.5979
5.2085	(0.05063-0.003118035j)	-25.8954	0.0507259	-3.52409	-0.0615071	(0.06378429-0.01331482j)	-23.7205	0.0651592	-11.791	-0.205792	(0.05057163-0.01670129j)	-25.4723	0.0532581	-18.2758	-0.318973	(0.03728148-0.01039606j)	-28.2449	0.0387038	-15.5813	-0.271945	(0.05343475-0.00807268j)	-25.3455	0.0540411	-8.59102	-0.149942	(0.05319612-0.02229653j)	-24.7795	0.0576798	-22.7404	-0.396895	(0.03955113-0.01898896j)	-27.156	0.0438734	-25.6462	-0.447611	(0.04360132-0.02974076j)	-25.5508	0.0527787	-34.2982	-0.598616	(0.06733571-0.02364384j)	-22.9302	0.0713662	-19.3479	-0.337684	(0.06923227-0.009256119j)	-23.1169	0.0698483	-7.61509
5.209	(0.05012847-0.004796579j)	-25.9587	0.0503574	-5.46575	-0.0953953	(0.06312875-0.01618352j)	-23.719	0.0651701	-14.3786	-0.250953	(0.04995542-0.01954913j)	-25.4095	0.0536443	-21.372	-0.373011	(0.03874778-0.0136969j)	-27.7237	0.0410974	-19.4679	-0.339779	(0.05418641-0.0113057j)	-25.1371	0.0553533	-11.7854	-0.205694	(0.05214592-0.02445299j)	-24.7924	0.0575947	-25.1235	-0.438487	(0.04005368-0.02181246j)	-26.8192	0.0456079	-28.5719	-0.498673	(0.04260866-0.03331031j)	-25.3386	0.054084	-38.0173	-0.663528	(0.06752913-0.02854985j)	-22.696	0.0733163	-22.9176	-0.399987	(0.06862134-0.01237824j)	-23.1318	0.0697288	-10.2253
5.2095	(0.05017344-0.008237587j)	-25.875	0.0508452	-9.32377	-0.16273	(0.06353103-0.02016312j)	-23.5235	0.0666539	-17.6081	-0.307319	(0.0500824-0.02178457j)	-25.2537	0.0546151	-23.5078	-0.410289	(0.03727788-0.01693192j)	-27.7564	0.040943	-24.4279	-0.426348	(0.05432529-0.01470334j)	-24.9929	0.0562799	-15.1445	-0.264321	(0.05247809-0.02891221j)	-24.4492	0.0599155	-28.8521	-0.503564	(0.04050813-0.02518641j)	-26.4297	0.0476997	-31.8718	-0.556267	(0.04332744-0.03672332j)	-24.9135	0.0567967	-40.2838	-0.703085	(0.06829456-0.03081288j)	-22.5076	0.0749238	-24.2838	-0.423832	(0.06853703-0.01701534j)	-23.0217	0.0706176	-13.9426
5.21	(0.05063521-0.0125319j)	-25.6528	0.0521629	-13.901	-0.242618	(0.06485555-0.02258858j)	-23.2638	0.0686767	-19.2027	-0.335151	(0.0516955-0.02690075j)	-24.6902	0.0582759	-27.4911	-0.47981	(0.03932226-0.01896785j)	-27.1987	0.043658	-25.7512	-0.449444	(0.05486282-0.01829902j)	-24.7563	0.0578341	-18.4457	-0.321938	(0.05354487-0.03237094j)	-24.0728	0.0625694	-31.1554	-0.543764	(0.04160919-0.02985083j)	-25.813	0.0512093	-35.656	-0.622315	(0.04363757-0.04084982j)	-24.4697	0.0597741	-43.1102	-0.752414	(0.06862509-0.03572287j)	-22.229	0.0773662	-27.4993	-0.479953	(0.06961948-0.0207951j)	-22.7742	0.0726588	-16.6307
5.2105	(0.05320987-0.01371151j)	-25.2009	0.0549481	-14.45	-0.252201	(0.06670455-0.02662353j)	-22.8749	0.0718214	-21.7582	-0.379753	(0.0536013-0.02925489j)	-24.2841	0.0610651	-28.6251	-0.499603	(0.04135437-0.02172775j)	-26.6109	0.0467149	-27.7176	-0.483764	(0.05782365-0.0208851j)	-24.2254	0.0614798	-19.859	-0.346605	(0.05534021-0.03452534j)	-23.7115	0.0652268	-31.959	-0.557789	(0.04382156-0.03107658j)	-25.3969	0.0537223	-35.3428	-0.616848	(0.04627541-0.0427024j)	-24.0177	0.0629675	-42.7005	-0.745264	(0.07123246-0.03695789j)	-21.9112	0.0802493	-27.4219	-0.478602	(0.07215917-0.02147958j)	-22.4655	0.0752882	-16.5767
5.211	(0.05427924-0.01783884j)	-24.8619	0.0571355	-18.1931	-0.317529	(0.06728113-0.02849596j)	-22.7256	0.0730669	-22.9544	-0.40063	(0.05444209-0.03094405j)	-24.0655	0.0626217	-29.6132	-0.516848	(0.04283877-0.02394436j)	-26.1825	0.0490764	-29.2026	-0.509682	(0.05797952-0.02304469j)	-24.0975	0.0623914	-21.676	-0.378317	(0.05582299-0.03722148j)	-23.4663	0.0670943	-33.6944	-0.588079	(0.04490682-0.0340649j)	-24.9798	0.0563652	-37.1828	-0.648962	(0.04752467-0.04518339j)	-23.6652	0.0655754	-43.5533	-0.760149	(0.07107744-0.03986346j)	-21.7776	0.0814929	-29.2857	-0.511132	(0.07351343-0.0264057j)	-22.1456	0.078112	-19.7581
5.2115	(0.05626817-0.01978286j)	-24.4886	0.0596445	-19.3707	-0.338083	(0.06967095-0.03239337j)	-22.289	0.0768334	-24.936	-0.435215	(0.05597528-0.0325496j)	-23.7751	0.0647511	-30.178	-0.526705	(0.0440595-0.02670944j)	-25.76	0.0515231	-31.2248	-0.544975	(0.06049184-0.02608508j)	-23.6254	0.0658764	-23.3265	-0.407124	(0.05791442-0.03989467j)	-23.0578	0.0703254	-34.5612	-0.603207	(0.04675577-0.03559652j)	-24.6178	0.0587641	-37.2831	-0.650712	(0.04876087-0.04724116j)	-23.3636	0.0678922	-44.0931	-0.76957	(0.0731256-0.04227837j)	-21.4662	0.0844678	-30.0348	-0.524207	(0.07424437-0.02778071j)	-22.0176	0.0792716	-20.5148
5.212	(0.05847533-0.02165712j)	-24.1023	0.062357	-20.3228	-0.354699	(0.07061485-0.03413249j)	-22.1102	0.0784314	-25.7973	-0.450248	(0.05817979-0.03555318j)	-23.3265	0.068183	-31.4288	-0.548535	(0.04521511-0.02836408j)	-25.4532	0.0533753	-32.1006	-0.560262	(0.06234453-0.0287342j)	-23.2675	0.0686476	-24.7447	-0.431876	(0.05917493-0.04257322j)	-22.7457	0.0728982	-35.733	-0.623659	(0.0465049-0.03862766j)	-24.3714	0.060455	-39.7135	-0.693132	(0.04940332-0.04981546j)	-23.0783	0.0701589	-45.238	-0.789552	(0.07520934-0.04489326j)	-21.151	0.0875891	-30.8334	-0.538145	(0.07603044-0.03119779j)	-21.7044	0.0821823	-22.31
5.2125	(0.06005662-0.0244021j)	-23.7652	0.0648248	-22.1128	-0.385941	(0.07310363-0.03654736j)	-21.7523	0.0817304	-26.5623	-0.463599	(0.05911701-0.03885388j)	-23.0064	0.0707421	-33.3144	-0.581446	(0.048192-0.0308395j)	-24.8498	0.0572149	-32.6164	-0.569263	(0.06406581-0.03057274j)	-22.9765	0.0709868	-25.5109	-0.445249	(0.06170744-0.04358725j)	-22.4354	0.075549	-35.2356	-0.614977	(0.04993497-0.0401491j)	-23.8664	0.0640738	-38.8002	-0.677192	(0.05176439-0.05225801j)	-22.6677	0.0735558	-45.2719	-0.790143	(0.07777644-0.04889207j)	-20.7368	0.0918673	-32.1544	-0.5612	(0.07789928-0.03398734j)	-21.4126	0.0849908	-23.5716
5.213	(0.06271356-0.02676131j)	-23.3263	0.0681847	-23.1091	-0.403329	(0.07530496-0.03842041j)	-21.4588	0.0845397	-27.0306	-0.471772	(0.06171101-0.03973523j)	-22.6864	0.0733971	-32.7772	-0.572069	(0.05000963-0.03287938j)	-24.4587	0.05985	-33.3234	-0.581602	(0.06681979-0.03295554j)	-22.5563	0.0745047	-26.2525	-0.458193	(0.06294236-0.04635108j)	-22.1395	0.0781675	-36.3681	-0.634743	(0.05183202-0.04225933j)	-23.4946	0.0668761	-39.1908	-0.684009	(0.05294024-0.05472438j)	-22.3676	0.0761408	-45.9494	-0.801968	(0.07854245-0.0495469j)	-20.643	0.0928645	-32.2449	-0.56278	(0.08087286-0.03534686j)	-21.0847	0.08826	-23.6086
5.2135	(0.06443869-0.02814693j)	-23.0587	0.0703178	-23.5958	-0.411824	(0.07642568-0.04123203j)	-21.2257	0.0868387	-28.3471	-0.49475	(0.06300769-0.04221956j)	-22.4015	0.075845	-33.8249	-0.590355	(0.05136234-0.03522207j)	-24.1132	0.0622791	-34.4406	-0.601103	(0.06787893-0.03389402j)	-22.3985	0.0758706	-26.5344	-0.463112	(0.06527777-0.04886485j)	-21.7725	0.0815412	-36.8174	-0.642584	(0.05297609-0.04494034j)	-23.164	0.0694701	-40.3084	-0.703514	(0.05487925-0.05659112j)	-22.0661	0.0788307	-45.8798	-0.800754	(0.07960552-0.05267017j)	-20.4043	0.0954525	-33.4902	-0.584514	(0.08245988-0.03816312j)	-20.8323	0.0908628	-24.8351
5.214	(0.0672986-0.03078719j)	-22.6146	0.0740064	-24.5827	-0.42905	(0.07941464-0.04306229j)	-20.8825	0.0903385	-28.4686	-0.496871	(0.06734598-0.04472209j)	-21.8472	0.0808427	-33.5867	-0.586199	(0.05449692-0.03673468j)	-23.6458	0.0657218	-33.9827	-0.59311	(0.07103545-0.03588938j)	-21.9832	0.079587	-26.8044	-0.467824	(0.06753167-0.0507007j)	-21.4684	0.0844458	-36.8981	-0.643993	(0.05640627-0.04562029j)	-22.7878	0.0725457	-38.9653	-0.680072	(0.05825275-0.05727534j)	-21.7562	0.0816936	-44.5153	-0.776938	(0.08254448-0.05424393j)	-20.1073	0.0987724	-33.3108	-0.581384	(0.085041-0.04040751j)	-20.5233	0.0941527	-25.4149
5.2145	(0.06785734-0.03124126j)	-22.5332	0.0747036	-24.7212	-0.431466	(0.08096592-0.04378738j)	-20.7197	0.0920479	-28.4051	-0.495762	(0.0679611-0.04546788j)	-21.7483	0.0817682	-33.7836	-0.589636	(0.05555526-0.03820906j)	-23.4234	0.0674264	-34.5189	-0.602468	(0.07278683-0.03827324j)	-21.6988	0.082236	-27.7366	-0.484095	(0.06920467-0.05100121j)	-21.3133	0.0859675	-36.3888	-0.635104	(0.05708625-0.04669409j)	-22.6447	0.0737508	-39.2817	-0.685595	(0.05883079-0.05803001j)	-21.6567	0.082635	-44.6074	-0.778546	(0.08395112-0.05431066j)	-20.0011	0.0999872	-32.9001	-0.574215	(0.08669085-0.04117024j)	-20.3573	0.0959703	-25.4035
5.215	(0.07169973-0.0306743j)	-22.1597	0.0779857	-23.162	-0.404254	(0.083031-0.04378921j)	-20.5494	0.0938703	-27.8064	-0.485314	(0.06963314-0.0454578j)	-21.602	0.0831576	-33.1372	-0.578354	(0.05870233-0.03703295j)	-23.1719	0.0694075	-32.2462	-0.562802	(0.07513411-0.03774669j)	-21.5058	0.084083	-26.6745	-0.465558	(0.07183465-0.05163907j)	-21.0642	0.0884693	-35.7109	-0.623272	(0.05936377-0.04702864j)	-22.4141	0.0757347	-38.3867	-0.669974	(0.06045852-0.05897944j)	-21.4668	0.0844619	-44.2905	-0.773015	(0.0866747-0.05542395j)	-19.7534	0.10288	-32.5968	-0.568921	(0.08908907-0.04187499j)	-20.1366	0.0984397	-25.1752
5.2155	(0.07435711-0.03303755j)	-21.7911	0.0813662	-23.956	-0.418111	(0.08691578-0.04525709j)	-20.1761	0.0979926	-27.506	-0.480071	(0.07333145-0.04679073j)	-21.2108	0.0869878	-32.5408	-0.567944	(0.06132968-0.03915567j)	-22.7618	0.0727633	-32.556	-0.56821	(0.0776252-0.04050396j)	-21.1542	0.0875571	-27.555	-0.480926	(0.07520209-0.05387312j)	-20.6764	0.0925077	-35.617	-0.621634	(0.0629181-0.04880673j)	-21.9786	0.079629	-37.8014	-0.659759	(0.06404039-0.06076221j)	-21.0828	0.0882792	-43.4954	-0.759137	(0.09009604-0.05762505j)	-19.4165	0.106948	-32.6028	-0.569026	(0.09300123-0.04359207j)	-19.7677	0.102711	-25.1137
5.216	(0.07671796-0.03383493j)	-21.5302	0.0838478	-23.7989	-0.41537	(0.08895002-0.04684375j)	-19.954	0.100531	-27.7726	-0.484724	(0.07608557-0.04709822j)	-20.9652	0.0894833	-31.7582	-0.554285	(0.0647666-0.03929459j)	-22.4118	0.0757547	-31.2456	-0.545339	(0.08017658-0.04004999j)	-20.9516	0.089623	-26.5432	-0.463265	(0.07633978-0.05445473j)	-20.5586	0.0937714	-35.501	-0.61961	(0.06506196-0.04851919j)	-21.813	0.0811614	-36.7133	-0.640768	(0.06539484-0.06128886j)	-20.9513	0.0896259	-43.1436	-0.752998	(0.0908343-0.05808979j)	-19.346	0.107821	-32.5995	-0.568968	(0.09462925-0.04441476j)	-19.6148	0.104534	-25.1433
5.2165	(0.08037266-0.0334499j)	-21.2041	0.0870555	-22.5963	-0.394381	(0.09222066-0.04858698j)	-19.6396	0.104237	-27.7828	-0.484901	(0.07782878-0.04826343j)	-20.7641	0.0915788	-31.804	-0.555085	(0.06716171-0.03996616j)	-22.141	0.0781536	-30.7558	-0.536789	(0.0829173-0.04077486j)	-20.6865	0.0924006	-26.1858	-0.457029	(0.07892657-0.05482943j)	-20.3453	0.0961024	-34.7873	-0.607153	(0.06781353-0.04941427j)	-21.524	0.0839074	-36.08	-0.629715	(0.06724909-0.06126057j)	-20.8222	0.0909687	-42.332	-0.738832	(0.09383344-0.05876807j)	-19.1157	0.110718	-32.059	-0.559535	(0.09591134-0.04474735j)	-19.5073	0.105836	-25.0114
5.217	(0.08202395-0.03475106j)	-21.0042	0.0890818	-22.9609	-0.400743	(0.09404476-0.04800303j)	-19.5278	0.105587	-27.041	-0.471955	(0.08016507-0.04863657j)	-20.5591	0.0937654	-31.2454	-0.545335	(0.06988652-0.04019164j)	-21.8712	0.0806194	-29.9031	-0.521908	(0.08605814-0.04052162j)	-20.4345	0.095121	-25.214	-0.440068	(0.08135968-0.05480958j)	-20.1667	0.0980994	-33.967	-0.592835	(0.07027978-0.04969522j)	-21.3025	0.0860747	-35.2643	-0.615479	(0.07107237-0.06174175j)	-20.524	0.0941452	-40.9814	-0.71526	(0.09602133-0.06023709j)	-18.9114	0.113352	-32.1013	-0.560273	(0.09921519-0.04546708j)	-19.2406	0.109137	-24.6204
5.2175	(0.08297162-0.03536995j)	-20.8963	0.090196	-23.0881	-0.402963	(0.09575684-0.04738541j)	-19.4253	0.10684	-26.3286	-0.45952	(0.08181921-0.04797252j)	-20.4596	0.0948459	-30.3841	-0.530302	(0.07060429-0.03910853j)	-21.8612	0.0807121	-28.9826	-0.505841	(0.08686648-0.04117862j)	-20.3426	0.0961325	-25.3631	-0.442669	(0.08319356-0.05444548j)	-20.05	0.0994257	-33.2025	-0.579493	(0.07228258-0.04919849j)	-21.1661	0.0874372	-34.2408	-0.597615	(0.07200394-0.0609979j)	-20.5035	0.094368	-40.2695	-0.702835	(0.09848566-0.06007385j)	-18.7588	0.115362	-31.3822	-0.547722	(0.101038-0.04576361j)	-19.0999	0.110919	-24.3674
5.218	(0.08612893-0.03467651j)	-20.6446	0.0928475	-21.9303	-0.382756	(0.09735475-0.0486559j)	-19.2645	0.108836	-26.5549	-0.463471	(0.08552889-0.04785049j)	-20.1751	0.0980044	-29.2255	-0.510082	(0.07307101-0.03946189j)	-21.6136	0.0830459	-28.3712	-0.495171	(0.08997105-0.04118218j)	-20.0918	0.0989483	-24.5948	-0.429261	(0.08513111-0.05471853j)	-19.8964	0.1012	-32.7311	-0.571266	(0.07384704-0.04928759j)	-21.0333	0.0887843	-33.7203	-0.58853	(0.07371516-0.05953741j)	-20.4679	0.0947556	-38.9267	-0.679399	(0.09940655-0.06040224j)	-18.687	0.116319	-31.2841	-0.54601	(0.1034161-0.04483996j)	-18.9601	0.112719	-23.441
5.2185	(0.08924948-0.03272176j)	-20.4401	0.0950588	-20.1346	-0.351415	(0.1000925-0.04800031j)	-19.093	0.111007	-25.6205	-0.447162	(0.08698925-0.04665526j)	-20.1127	0.0987109	-28.2062	-0.49229	(0.07670546-0.03824596j)	-21.3392	0.0857116	-26.5012	-0.462533	(0.09287591-0.04077482j)	-19.8765	0.101432	-23.7027	-0.413689	(0.08756585-0.05386816j)	-19.7594	0.102808	-31.5987	-0.551502	(0.07588063-0.04806805j)	-20.9321	0.0898243	-32.353	-0.564666	(0.07631104-0.0601469j)	-20.2498	0.0971649	-38.2445	-0.667492	(0.1022079-0.05901385j)	-18.5608	0.118022	-30.0017	-0.523629	(0.1061967-0.04489915j)	-18.7636	0.115298	-22.9183
5.219	(0.09110776-0.03300364j)	-20.2734	0.0969013	-19.9128	-0.347545	(0.1038254-0.04563841j)	-18.9067	0.113413	-23.7288	-0.414146	(0.08929799-0.0460435j)	-19.9593	0.10047	-27.2764	-0.476062	(0.07859585-0.03612379j)	-21.2597	0.0864999	-24.6842	-0.43082	(0.09493182-0.03944666j)	-19.76	0.102801	-22.5642	-0.393819	(0.09022677-0.05353616j)	-19.5833	0.104914	-30.6828	-0.535516	(0.0788502-0.04670436j)	-20.7579	0.0916442	-30.639	-0.534752	(0.07907172-0.05934298j)	-20.0993	0.0988632	-36.8881	-0.643818	(0.1040453-0.0577106j)	-18.4906	0.118979	-29.0157	-0.50642	(0.1084603-0.04399658j)	-18.633	0.117044	-22.0798
5.2195	(0.09182437-0.03081951j)	-20.2773	0.0968584	-18.5536	-0.323821	(0.1040591-0.04559782j)	-18.8916	0.113611	-23.6626	-0.412991	(0.09064803-0.04421712j)	-19.9258	0.100857	-26.0026	-0.453831	(0.07988071-0.03550642j)	-21.1681	0.0874164	-23.9648	-0.418265	(0.09610746-0.03813886j)	-19.7097	0.103398	-21.6449	-0.377775	(0.091171-0.05118598j)	-19.6129	0.104557	-29.3111	-0.511575	(0.07992624-0.04503989j)	-20.7485	0.0917431	-29.4021	-0.513163	(0.07974488-0.05683812j)	-20.1819	0.0979276	-35.4794	-0.619231	(0.1048207-0.05717467j)	-18.4599	0.1194	-28.6104	-0.499345	(0.1090557-0.04328455j)	-18.6117	0.117332	-21.6483
5.22	(0.09521259-0.03102658j)	-19.9878	0.10014	-18.049	-0.315015	(0.1068519-0.04520969j)	-18.7091	0.116023	-22.9335	-0.400265	(0.09249955-0.0434757j)	-19.8104	0.102207	-25.174	-0.439369	(0.08117373-0.03626638j)	-21.0213	0.0889068	-24.0739	-0.420169	(0.09859379-0.03776924j)	-19.5283	0.105581	-20.9608	-0.365835	(0.09321542-0.05187437j)	-19.4386	0.106677	-29.0959	-0.50782	(0.08177143-0.04475109j)	-20.6102	0.093216	-28.6906	-0.500745	(0.08191384-0.05729628j)	-20.0032	0.0999637	-34.9716	-0.61037	(0.1074305-0.05696179j)	-18.3015	0.121598	-27.9334	-0.48753	(0.1113529-0.04276j)	-18.4686	0.119281	-21.007
5.2205	(0.09611737-0.02936955j)	-19.9563	0.100504	-16.991	-0.296549	(0.1072753-0.04327085j)	-18.7353	0.115673	-21.9673	-0.383402	(0.09332841-0.04270571j)	-19.7741	0.102635	-24.5881	-0.429144	(0.0830799-0.0334926j)	-20.9561	0.0895769	-21.9562	-0.383208	(0.09868769-0.03566987j)	-19.5815	0.104936	-19.872	-0.346831	(0.09230097-0.04914368j)	-19.612	0.104568	-28.0321	-0.489253	(0.08221316-0.04326264j)	-20.6396	0.0929013	-27.7545	-0.484407	(0.08270632-0.05409238j)	-20.1027	0.0988247	-33.1859	-0.579203	(0.1078386-0.05455345j)	-18.3549	0.120852	-26.834	-0.468341	(0.1120771-0.0413434j)	-18.4556	0.119459	-20.2482
5.221	(0.09818985-0.02804357j)	-19.8181	0.102116	-15.9396	-0.278199	(0.1082222-0.04182653j)	-18.7091	0.116024	-21.1309	-0.368804	(0.09453382-0.04141915j)	-19.7256	0.103209	-23.6602	-0.412948	(0.08526087-0.03099836j)	-20.8458	0.0907211	-19.9798	-0.348713	(0.1021166-0.03417986j)	-19.3569	0.107685	-18.5061	-0.322993	(0.09558761-0.04686911j)	-19.4563	0.10646	-26.1199	-0.455879	(0.08485661-0.04077942j)	-20.5239	0.0941467	-25.6675	-0.447982	(0.08461753-0.05297545j)	-20.0146	0.0998325	-32.0489	-0.559359	(0.1101527-0.05315039j)	-18.2511	0.122305	-25.758	-0.449562	(0.1149336-0.03992171j)	-18.2964	0.12167	-19.1545
5.2215	(0.100913-0.02619756j)	-19.6378	0.104258	-14.553	-0.253998	(0.1110267-0.04023279j)	-18.5556	0.118092	-19.919	-0.347652	(0.09723211-0.03876198j)	-19.6033	0.104674	-21.7349	-0.379346	(0.08730096-0.02911321j)	-20.7217	0.0920274	-18.4426	-0.321883	(0.1030287-0.0327348j)	-19.3232	0.108104	-17.6264	-0.307638	(0.09776048-0.04581347j)	-19.3345	0.107963	-25.1092	-0.438238	(0.08740106-0.03956274j)	-20.3602	0.0959383	-24.3542	-0.425062	(0.0855904-0.05243721j)	-19.9674	0.100376	-31.4938	-0.549671	(0.1111768-0.05163941j)	-18.2313	0.122584	-24.9139	-0.43483	(0.1164029-0.03877963j)	-18.2236	0.122693	-18.4255
5.222	(0.1008973-0.02435961j)	-19.6764	0.103796	-13.5732	-0.236896	(0.1112165-0.03832367j)	-18.5893	0.117634	-19.0132	-0.331844	(0.09738106-0.03750458j)	-19.6299	0.104354	-21.0633	-0.367624	(0.08851815-0.02758617j)	-20.6568	0.0927171	-17.3093	-0.302105	(0.1040846-0.03140824j)	-19.2738	0.10872	-16.7915	-0.293068	(0.09825577-0.04463027j)	-19.3382	0.107917	-24.4288	-0.426362	(0.08729734-0.03754608j)	-20.4429	0.0950291	-23.2723	-0.406178	(0.08672467-0.05003367j)	-19.9894	0.100123	-29.9817	-0.52328	(0.1126136-0.05007809j)	-18.1845	0.123246	-23.9742	-0.418429	(0.1167428-0.03762532j)	-18.2262	0.122656	-17.8637
5.2225	(0.1022453-0.02209794j)	-19.6089	0.104606	-12.1956	-0.212853	(0.112899-0.03753935j)	-18.4908	0.118976	-18.3922	-0.321004	(0.09869292-0.0347772j)	-19.606	0.104641	-19.4113	-0.338792	(0.08890298-0.02604789j)	-20.664	0.0926403	-16.3302	-0.285015	(0.1047705-0.03021481j)	-19.2483	0.10904	-16.0871	-0.280772	(0.09908219-0.04215354j)	-19.3576	0.107676	-23.0468	-0.402243	(0.08813846-0.03579062j)	-20.4338	0.0951281	-22.1007	-0.38573	(0.08725492-0.04773966j)	-20.0469	0.099461	-28.6843	-0.500636	(0.1125743-0.0490386j)	-18.2166	0.122792	-23.5385	-0.410824	(0.1182318-0.0351553j)	-18.1774	0.123348	-16.5594
5.223	(0.1033336-0.02046827j)	-19.548	0.105341	-11.2041	-0.195548	(0.1128012-0.03469446j)	-18.5612	0.118016	-17.0964	-0.298389	(0.1005454-0.03382264j)	-19.4872	0.106082	-18.5925	-0.324501	(0.09009261-0.02381648j)	-20.6129	0.0931875	-14.8077	-0.258443	(0.1052612-0.02767945j)	-19.2643	0.10884	-14.7329	-0.257138	(0.09995053-0.04057277j)	-19.3419	0.107871	-22.0936	-0.385607	(0.08791527-0.03438906j)	-20.5004	0.0944018	-21.3635	-0.372864	(0.08650091-0.04552531j)	-20.1977	0.0977495	-27.7578	-0.484464	(0.1131149-0.04698209j)	-18.2384	0.122484	-22.5555	-0.393667	(0.1173674-0.03321611j)	-18.2744	0.121977	-15.802
5.2235	(0.1023455-0.01801608j)	-19.6661	0.103919	-9.98361	-0.174247	(0.1130049-0.03291811j)	-18.5843	0.117702	-16.2407	-0.283454	(0.09928314-0.03103647j)	-19.6576	0.104021	-17.3595	-0.302981	(0.09003872-0.01971715j)	-20.708	0.0921723	-12.3519	-0.215582	(0.1051809-0.02422536j)	-19.3368	0.107935	-12.9702	-0.226373	(0.09917995-0.03772863j)	-19.4846	0.106114	-20.8271	-0.363502	(0.08795831-0.03066193j)	-20.6164	0.0931494	-19.2184	-0.335424	(0.08681948-0.04194083j)	-20.3167	0.0964192	-25.7843	-0.450021	(0.1133943-0.0452291j)	-18.267	0.122082	-21.7454	-0.379528	(0.1173993-0.0321828j)	-18.292	0.121731	-15.33
5.224	(0.1032055-0.01667155j)	-19.6141	0.104543	-9.17615	-0.160154	(0.1132353-0.03054458j)	-18.6153	0.117283	-15.0959	-0.263474	(0.0983727-0.02923787j)	-19.7749	0.102626	-16.5528	-0.2889	(0.08892315-0.01805509j)	-20.8443	0.0907376	-11.4774	-0.200318	(0.1065139-0.02302687j)	-19.2535	0.108975	-12.1988	-0.21291	(0.1003882-0.03628735j)	-19.433	0.106745	-19.8734	-0.346857	(0.08968441-0.02947795j)	-20.5001	0.0944047	-18.1949	-0.317562	(0.08705249-0.04109045j)	-20.3308	0.096263	-25.2682	-0.441013	(0.1137913-0.04307904j)	-18.2961	0.121673	-20.7356	-0.361905	(0.119143-0.02904687j)	-18.2279	0.122633	-13.7013
5.2245	(0.1033344-0.01213533j)	-19.6556	0.104045	-6.69799	-0.116902	(0.1139492-0.02777098j)	-18.6152	0.117284	-13.6968	-0.239053	(0.1000049-0.02591724j)	-19.7173	0.103309	-14.5291	-0.253581	(0.09038825-0.01506835j)	-20.7587	0.0916356	-9.46457	-0.165188	(0.1063045-0.0187744j)	-19.3356	0.10795	-10.0157	-0.174807	(0.09987965-0.03297538j)	-19.5611	0.105182	-18.2707	-0.318884	(0.08972126-0.02593269j)	-20.5936	0.0933938	-16.1212	-0.281368	(0.08725145-0.0370112j)	-20.466	0.0947768	-22.9862	-0.401184	(0.1126398-0.04106507j)	-18.4242	0.119892	-20.0303	-0.349595	(0.1188421-0.02655518j)	-18.289	0.121773	-12.5958
5.225	(0.10364-0.01272639j)	-19.6245	0.104418	-7.00054	-0.122183	(0.1133522-0.02790416j)	-18.6559	0.116736	-13.8296	-0.241373	(0.09945098-0.02601749j)	-19.7603	0.102798	-14.6607	-0.255877	(0.08965789-0.01508678j)	-20.827	0.0909184	-9.55171	-0.166709	(0.1063306-0.01895744j)	-19.3309	0.108007	-10.1089	-0.176434	(0.09970897-0.03253271j)	-19.586	0.104882	-18.0703	-0.315386	(0.08901522-0.02497067j)	-20.6817	0.0924513	-15.6699	-0.273492	(0.08679907-0.03695926j)	-20.5061	0.0943402	-23.0644	-0.40255	(0.1120632-0.03999746j)	-18.49	0.118987	-19.6424	-0.342825	(0.1178415-0.02633704j)	-18.3623	0.120749	-12.5983
5.2255	(0.1033024-0.008319033j)	-19.6897	0.103637	-4.60414	-0.0803575	(0.1120972-0.02404417j)	-18.8128	0.114647	-12.1062	-0.211292	(0.0986213-0.02200365j)	-19.9096	0.101046	-12.5774	-0.219517	(0.08927776-0.01089191j)	-20.921	0.0899397	-6.95573	-0.1214	(0.1055814-0.01524123j)	-19.4387	0.106676	-8.2142	-0.143365	(0.09969725-0.02970172j)	-19.657	0.104028	-16.5898	-0.289547	(0.0879732-0.02159469j)	-20.8589	0.0905848	-13.7916	-0.24071	(0.08571154-0.03306145j)	-20.7368	0.0918669	-21.0931	-0.368144	(0.1123711-0.03643644j)	-18.5527	0.118131	-17.9653	-0.313554	(0.118806-0.02318113j)	-18.341	0.121046	-11.0407
5.226	(0.1016414-0.007284526j)	-19.8363	0.101902	-4.09932	-0.0715466	(0.1102537-0.02300099j)	-18.9671	0.112627	-11.784	-0.205669	(0.09609964-0.02051162j)	-20.1521	0.0982643	-12.0485	-0.210286	(0.08782979-0.00913337j)	-21.0805	0.0883034	-5.93682	-0.103617	(0.1033005-0.01425026j)	-19.6361	0.104279	-7.85436	-0.137084	(0.09630301-0.02778062j)	-19.9801	0.10023	-16.0913	-0.280846	(0.08649017-0.02032662j)	-21.0272	0.0888466	-13.2254	-0.230828	(0.08383263-0.03123118j)	-20.9673	0.0894611	-20.4325	-0.356614	(0.1092619-0.03489514j)	-18.8088	0.114699	-17.712	-0.309133	(0.1154194-0.0226179j)	-18.5908	0.117615	-11.0873
5.2265	(0.1009334-0.005225346j)	-19.9077	0.101069	-2.96357	-0.0517241	(0.1110005-0.02172087j)	-18.9303	0.113106	-11.0719	-0.193241	(0.09682281-0.01873545j)	-20.1208	0.0986188	-10.9515	-0.19114	(0.0882279-0.007692741j)	-21.055	0.0885626	-4.98311	-0.0869718	(0.103792-0.01217778j)	-19.6173	0.104504	-6.69184	-0.116795	(0.09675781-0.02625783j)	-19.9777	0.100257	-15.1831	-0.264995	(0.08713119-0.01739339j)	-21.0268	0.0888503	-11.2892	-0.197033	(0.08364768-0.02948508j)	-21.0423	0.0886922	-19.4171	-0.338893	(0.1094445-0.03330969j)	-18.8314	0.114401	-16.9277	-0.295445	(0.1164339-0.02037806j)	-18.5474	0.118204	-9.92726
5.227	(0.1009498-0.0036548j)	-19.9122	0.101016	-2.07344	-0.0361883	(0.1091549-0.01877793j)	-19.1125	0.110758	-9.76106	-0.170363	(0.09461559-0.01649238j)	-20.3508	0.0960422	-9.88784	-0.172575	(0.08674925-0.005084557j)	-21.2198	0.0868981	-3.35439	-0.0585451	(0.1016595-0.01037597j)	-19.812	0.102188	-5.82777	-0.101714	(0.09422725-0.02250695j)	-20.2755	0.096878	-13.4339	-0.234465	(0.08508459-0.01408069j)	-21.2856	0.0862418	-9.39674	-0.164004	(0.08180121-0.02637611j)	-21.3152	0.0859485	-17.8715	-0.311916	(0.1080543-0.02984674j)	-19.0078	0.112101	-15.4412	-0.2695	(0.114067-0.01779216j)	-18.7524	0.115446	-8.86555
5.2275	(0.09935078-0.0010026090000000002j)	-20.0561	0.0993558	-0.578187	-0.0100913	(0.1074621-0.01617866j)	-19.2776	0.108673	-8.56171	-0.14943	(0.09303028-0.0137652j)	-20.5335	0.0940431	-8.41669	-0.146899	(0.08520806-0.001076502j)	-21.3897	0.0852149	-0.723825	-0.0126331	(0.1014218-0.00851004j)	-19.8469	0.101778	-4.79631	-0.0837113	(0.09265997-0.02034074j)	-20.4578	0.0948663	-12.3812	-0.216093	(0.08271323-0.01267632j)	-21.5477	0.083679	-8.71314	-0.152073	(0.08016738-0.02447469j)	-21.533	0.0838202	-16.9772	-0.296307	(0.1062881-0.02779173j)	-19.1831	0.109861	-14.6534	-0.25575	(0.1124957-0.01577125j)	-18.8928	0.113596	-7.98053
5.228	(0.0971553-0.00038806379999999996j)	-20.2506	0.0971561	-0.228853	-0.00399424	(0.1065612-0.0158941j)	-19.3525	0.10774	-8.48339	-0.148063	(0.09177148-0.01153317j)	-20.6778	0.0924933	-7.16296	-0.125017	(0.08349424-0.0009474388j)	-21.5663	0.0834996	-0.650128	-0.0113469	(0.098833-0.005857834j)	-20.0867	0.0990064	-3.39195	-0.0592008	(0.09090414-0.01918699j)	-20.639	0.092907	-11.9184	-0.208015	(0.08132146-0.01105976j)	-21.7163	0.0820701	-7.74474	-0.135171	(0.07888619-0.02221927j)	-21.7284	0.0819556	-15.7305	-0.27455	(0.1047273-0.02793743j)	-19.3002	0.10839	-14.9366	-0.260693	(0.111466-0.01403782j)	-18.9888	0.112346	-7.17793
5.2285	(0.09453726+0.002693872j)	-20.4844	0.0945756	1.63222	0.0284876	(0.1028305-0.01350023j)	-19.6833	0.103713	-7.47937	-0.13054	(0.08971988-0.01001226j)	-20.8885	0.0902768	-6.36756	-0.111135	(0.08164477+0.002021758j)	-21.7588	0.0816698	1.41852	0.0247578	(0.09686093-0.004169597j)	-20.269	0.0969506	-2.4649	-0.0430207	(0.08955737-0.01696126j)	-20.8049	0.0911494	-10.7242	-0.187173	(0.07994431-0.00900065j)	-21.8895	0.0804494	-6.42368	-0.112114	(0.07599416-0.01935884j)	-22.1113	0.0784212	-14.2916	-0.249436	(0.1029307-0.0243563j)	-19.5125	0.105773	-13.3129	-0.232354	(0.1078687-0.01276212j)	-19.2817	0.108621	-6.74739
5.229	(0.09323788+0.003685506j)	-20.6014	0.0933107	2.26361	0.0395074	(0.1006076-0.01254878j)	-19.8803	0.101387	-7.10978	-0.124089	(0.08697771-0.007700632j)	-21.1779	0.0873179	-5.05953	-0.0883054	(0.07905253+0.003323499j)	-22.034	0.0791224	2.40739	0.0420169	(0.0945361-0.002780053j)	-20.4843	0.094577	-1.68443	-0.0293988	(0.08497628-0.01571053j)	-21.2681	0.0864164	-10.4746	-0.182817	(0.07630429-0.007130376j)	-22.3113	0.0766367	-5.33859	-0.093176	(0.07279512-0.01884093j)	-22.4764	0.0751938	-14.5109	-0.253264	(0.09862973-0.02386132j)	-19.8728	0.101475	-13.6002	-0.237367	(0.1053805-0.0122394j)	-19.4866	0.106089	-6.62493
5.2295	(0.09081382+0.005658831j)	-20.8201	0.09099	3.56563	0.062232	(0.0992968-0.009978632j)	-20.0177	0.0997969	-5.73856	-0.100157	(0.08602093-0.007149772j)	-21.278	0.0863176	-4.75131	-0.082926	(0.07825059+0.005583572j)	-22.1082	0.0784495	4.08142	0.0712343	(0.09355226-0.001342005j)	-20.578	0.0935619	-0.82185	-0.014344	(0.0836014-0.01372086j)	-21.4403	0.0847199	-9.32043	-0.162672	(0.07529896-0.005574596j)	-22.4405	0.075505	-4.23405	-0.073898	(0.07259364-0.01667893j)	-22.5586	0.0744851	-12.9396	-0.225838	(0.09743775-0.02222262j)	-20.0052	0.0999398	-12.8477	-0.224235	(0.104792-0.009116709j)	-19.5607	0.105188	-4.97211
5.23	(0.08891397+0.006089843j)	-21.0003	0.0891223	3.91815	0.0683846	(0.09454819-0.009371082j)	-20.4445	0.0950115	-5.66035	-0.0987917	(0.08283306-0.005307678j)	-21.6181	0.0830029	-3.66632	-0.0639893	(0.07450927+0.006090559j)	-22.5269	0.0747578	4.6731	0.081561	(0.09014247-0.00015460119999999994j)	-20.9014	0.0901426	-0.0982665	-0.00171507	(0.08118984-0.01347119j)	-21.692	0.0822998	-9.42081	-0.164424	(0.07109326-0.004914452j)	-22.9427	0.0712629	-3.95439	-0.069017	(0.06886779-0.01552296j)	-23.0245	0.0705956	-12.7023	-0.221697	(0.09484338-0.02151614j)	-20.2419	0.0972533	-12.7818	-0.223084	(0.1014181-0.00875676j)	-19.8454	0.101795	-4.93486
5.2305	(0.08568506+0.008969729j)	-21.2946	0.0861533	5.9761	0.104303	(0.09254829-0.007874432j)	-20.6413	0.0928827	-4.86327	-0.0848801	(0.07948101-0.004135047j)	-21.983	0.0795885	-2.97816	-0.0519787	(0.07278117+0.008195596j)	-22.7049	0.0732412	6.42478	0.112134	(0.08663285+0.001661648j)	-21.2448	0.0866488	1.09882	0.019178	(0.07905181-0.01058694j)	-21.9646	0.0797576	-7.6279	-0.133132	(0.06910464-0.003015721j)	-23.2016	0.0691704	-2.4988	-0.0436122	(0.06529619-0.01323556j)	-23.5274	0.0666241	-11.4586	-0.199991	(0.09046552-0.01941658j)	-20.6747	0.0925257	-12.1136	-0.211422	(0.09809387-0.00839039j)	-20.1355	0.098452	-4.88885
5.231	(0.08376905+0.009775998j)	-21.4796	0.0843376	6.65641	0.116176	(0.09136233-0.007472402j)	-20.7557	0.0916674	-4.67574	-0.081607	(0.07769706-0.002755971j)	-22.1864	0.0777459	-2.03147	-0.0354559	(0.06960003+0.00994852j)	-23.06	0.0703074	8.13467	0.141977	(0.08482718+0.002524282j)	-21.4255	0.0848647	1.7045	0.0297492	(0.07629191-0.009064992j)	-22.2895	0.0768286	-6.77611	-0.118265	(0.06698326-0.0007745148999999999j)	-23.4801	0.0669877	-0.662471	-0.0115623	(0.06398889-0.0119175j)	-23.7298	0.0650892	-10.5501	-0.184134	(0.08799247-0.01932521j)	-20.9065	0.0900896	-12.3868	-0.216191	(0.09642522-0.006945838j)	-20.2937	0.0966751	-4.12009
5.2315	(0.08114147+0.008945429j)	-21.7627	0.0816331	6.29116	0.109801	(0.08749122-0.007095432j)	-21.1322	0.0877785	-4.63647	-0.0809217	(0.07500316-0.003357097j)	-22.4897	0.0750783	-2.56281	-0.0447296	(0.06749832+0.01039313j)	-23.3124	0.0682938	8.75344	0.152776	(0.0820284+0.00299432j)	-21.7149	0.082083	2.09057	0.0364873	(0.07341104-0.009627441j)	-22.6107	0.0740396	-7.47138	-0.1304	(0.06477469-0.0004263046j)	-23.7717	0.0647761	-0.377078	-0.00658125	(0.06099135-0.01219272j)	-24.1245	0.0621981	-11.3049	-0.197308	(0.08573823-0.01935577j)	-21.1206	0.0878959	-12.7215	-0.222032	(0.0932506-0.006273042j)	-20.5874	0.0934614	-3.84853
5.232	(0.07773491+0.009869533j)	-22.1182	0.0783589	7.23579	0.126288	(0.08417801-0.006264043j)	-21.472	0.0844108	-4.25578	-0.0742773	(0.07165082-0.002846874j)	-22.8887	0.0717074	-2.27531	-0.0397117	(0.06334741+0.01050949j)	-23.8475	0.0642133	9.41971	0.164405	(0.07813758+0.003196452j)	-22.1355	0.0782029	2.34255	0.0408852	(0.06994296-0.00825889j)	-23.045	0.0704289	-6.73432	-0.117536	(0.06046529+4.145614999999999e-05j)	-24.3699	0.0604653	0.0392831	0.000685619	(0.05673368-0.01077196j)	-24.7694	0.0577473	-10.7507	-0.187635	(0.08157481-0.01753176j)	-21.5728	0.0834375	-12.1293	-0.211696	(0.09001038-0.00554655j)	-20.8977	0.0901811	-3.52618
5.2325	(0.07597591+0.01070398j)	-22.3011	0.0767262	8.01942	0.139965	(0.08064175-0.006339498j)	-21.842	0.0808905	-4.49495	-0.0784518	(0.06817301-0.001809884j)	-23.3247	0.068197	-1.52075	-0.0265422	(0.060525+0.01095067j)	-24.2214	0.0615077	10.2555	0.178992	(0.07655025+0.002508776j)	-22.3164	0.0765913	1.87708	0.0327612	(0.06741682-0.008176386j)	-23.3612	0.0679108	-6.91512	-0.120692	(0.05852513+0.0002864604j)	-24.653	0.0585258	0.280441	0.00489462	(0.05395116-0.01054835j)	-25.1971	0.0549727	-11.0627	-0.193081	(0.07957448-0.01797187j)	-21.7685	0.0815787	-12.7267	-0.222123	(0.08695433-0.005556999j)	-21.1965	0.0871317	-3.65663
5.233	(0.0717824+0.009638308j)	-22.802	0.0724266	7.64743	0.133473	(0.07820646-0.006404586j)	-22.1061	0.0784683	-4.68169	-0.081711	(0.06624775-0.002385917j)	-23.5709	0.0662907	-2.06262	-0.0359995	(0.05883485+0.01123398j)	-24.4518	0.0598978	10.81	0.18867	(0.07368359+0.003689877j)	-22.6417	0.0737759	2.86682	0.0500355	(0.06482457-0.009133225j)	-23.6798	0.0654648	-8.0197	-0.13997	(0.05511998+0.000362035j)	-25.1736	0.0551212	0.376321	0.00656803	(0.05139377-0.01149879j)	-25.5697	0.0526644	-12.6116	-0.220114	(0.07582869-0.0184638j)	-22.1532	0.0780442	-13.6848	-0.238846	(0.08401734-0.006890117j)	-21.4835	0.0842994	-4.68824
5.2335	(0.0697984+0.01040363j)	-23.0277	0.0705695	8.47767	0.147963	(0.0747254-0.007524057j)	-22.4868	0.0751032	-5.7497	-0.100351	(0.06277327-0.002283395j)	-24.0388	0.0628148	-2.08323	-0.0363592	(0.0542357+0.01118994j)	-25.1333	0.055378	11.6577	0.203466	(0.07001305+0.002935233j)	-23.0888	0.0700746	2.40067	0.0418995	(0.06015675-0.008931006j)	-24.3196	0.0608161	-8.44458	-0.147386	(0.05230803+0.0004705206j)	-25.6283	0.0523101	0.515372	0.00899495	(0.04772491-0.01078599j)	-26.2088	0.0489286	-12.7351	-0.222269	(0.07248825-0.01986752j)	-22.4801	0.0751616	-15.3272	-0.26751	(0.08088885-0.006239782j)	-21.8165	0.0811292	-4.41107
5.234	(0.06606047+0.009114944j)	-23.5193	0.0666863	7.856	0.137113	(0.07091387-0.008358883j)	-22.9254	0.0714048	-6.72265	-0.117332	(0.05869789-0.002489721j)	-24.6197	0.0587507	-2.42879	-0.0423904	(0.05199494+0.009956188j)	-25.5244	0.0529396	10.84	0.189194	(0.06740154+0.001641673j)	-23.424	0.0674215	1.39526	0.0243518	(0.05652312-0.009284678j)	-24.8398	0.0572806	-9.32829	-0.162809	(0.04824757-9.033627e-05j)	-26.3305	0.0482477	-0.107278	-0.00187235	(0.04406084-0.01103206j)	-26.8549	0.045421	-14.0569	-0.245339	(0.0699169-0.01788007j)	-22.8332	0.072167	-14.345	-0.250367	(0.07681624-0.008330869j)	-22.2402	0.0772667	-6.18965
5.2345	(0.06301808+0.008011542j)	-23.9411	0.0635253	7.2452	0.126453	(0.06782317-0.007626867j)	-23.3179	0.0682507	-6.41608	-0.111982	(0.05558752-0.003335766j)	-25.0848	0.0556875	-3.43416	-0.0599374	(0.04885973+0.01016769j)	-26.0369	0.0499065	11.7555	0.205171	(0.06427275+0.0009848967j)	-23.8384	0.0642803	0.877915	0.0153225	(0.0541157-0.01021645j)	-25.1814	0.0550716	-10.691	-0.186593	(0.04537464-0.0009189409j)	-26.862	0.0453839	-1.16021	-0.0202495	(0.04178303-0.01200197j)	-27.2357	0.0434726	-16.0265	-0.279714	(0.06623299-0.01996403j)	-23.2008	0.0691764	-16.7739	-0.29276	(0.07394423-0.008514869j)	-22.5647	0.0744329	-6.56882
5.235	(0.0611637+0.008624598j)	-24.1846	0.0617688	8.02627	0.140085	(0.06544948-0.007984682j)	-23.6177	0.0659347	-6.95558	-0.121398	(0.0533588-0.003716971j)	-25.4349	0.0534881	-3.98478	-0.0695476	(0.04831374+0.009810694j)	-26.1431	0.0492998	11.4785	0.200338	(0.0609163+0.0009715203j)	-24.3042	0.060924	0.913701	0.0159471	(0.05156567-0.009022102j)	-25.6218	0.052349	-9.92421	-0.17321	(0.04319838-0.00023171629999999997j)	-27.2905	0.043199	-0.307332	-0.00536395	(0.0382723-0.0109797j)	-27.9988	0.0398161	-16.0073	-0.279381	(0.06385808-0.02092368j)	-23.4528	0.0671986	-18.1419	-0.316635	(0.07286052-0.008573695j)	-22.6904	0.0733632	-6.71129
5.2355	(0.05779389+0.006341909j)	-24.7104	0.0581408	6.26219	0.109296	(0.06100918-0.00995382j)	-24.178	0.0618158	-9.26632	-0.161728	(0.04925726-0.005558081j)	-26.0956	0.0495698	-6.4379	-0.112363	(0.04296179+0.008263339j)	-27.1806	0.0437493	10.8874	0.190021	(0.0570912-0.0008931946999999998j)	-24.8676	0.0570982	-0.896322	-0.0156438	(0.0479657-0.01186385j)	-26.1235	0.0494111	-13.8927	-0.242474	(0.03967002-0.002442358j)	-28.0143	0.0397451	-3.52307	-0.0614892	(0.03455544-0.01291565j)	-28.6618	0.0368903	-20.494	-0.357688	(0.05905447-0.02177947j)	-24.0211	0.0629426	-20.2441	-0.353327	(0.0679459-0.01069844j)	-23.2504	0.068783	-8.94806
5.236	(0.05387912+0.006386583j)	-25.311	0.0542563	6.76003	0.117985	(0.05937451-0.01085506j)	-24.3852	0.0603586	-10.3606	-0.180827	(0.04655151-0.005824631j)	-26.5739	0.0469145	-7.13191	-0.124475	(0.0405617+0.006786295j)	-27.7178	0.0411255	9.49807	0.165773	(0.05521917-0.00194584j)	-25.1528	0.0552534	-2.01818	-0.0352239	(0.04559168-0.01336954j)	-26.464	0.0475115	-16.3435	-0.285248	(0.03728608-0.002311216j)	-28.5524	0.0373576	-3.547	-0.0619068	(0.03201686-0.01336226j)	-29.1951	0.0346934	-22.6533	-0.395374	(0.05715205-0.02306044j)	-24.2043	0.0616291	-21.9737	-0.383514	(0.0651048-0.01263817j)	-23.5671	0.0663201	-10.9856
5.2365	(0.05197933+0.003793311j)	-25.6603	0.0521176	4.17389	0.0728482	(0.05678445-0.01301261j)	-24.6931	0.0582563	-12.9069	-0.225269	(0.04472689-0.009494478j)	-26.7972	0.0457235	-11.9847	-0.209172	(0.03773581+0.005566151j)	-28.3714	0.0381441	8.3908	0.146447	(0.05219597-0.004228346j)	-25.6189	0.052367	-4.63136	-0.0808325	(0.04244578-0.01373275j)	-27.011	0.044612	-17.9283	-0.312907	(0.03416514-0.005368928j)	-29.2224	0.0345844	-8.93079	-0.155872	(0.02961241-0.01676698j)	-29.3628	0.0340298	-29.5192	-0.515207	(0.05404484-0.02578765j)	-24.4541	0.0598819	-25.5083	-0.445203	(0.06307025-0.01456643j)	-23.7778	0.0647305	-13.0048
5.237	(0.04998738+0.0009296871000000003j)	-26.0213	0.049996	1.06549	0.0185963	(0.05319861-0.01624942j)	-25.0946	0.055625	-16.9852	-0.296448	(0.04118872-0.01064204j)	-27.4238	0.0425413	-14.4868	-0.252843	(0.03542947+0.003130755j)	-28.9789	0.0355675	5.04987	0.0881369	(0.0493147-0.00578194j)	-26.0812	0.0496525	-6.68716	-0.116713	(0.04056948-0.0165626j)	-27.1665	0.0438201	-22.2079	-0.3876	(0.03251157-0.00692755j)	-29.5664	0.0332414	-12.0287	-0.20994	(0.02631291-0.01811246j)	-29.9122	0.0319442	-34.5415	-0.602863	(0.05139363-0.02693614j)	-24.7277	0.0580247	-27.6597	-0.482752	(0.0596841-0.01741312j)	-24.128	0.0621724	-16.2649
5.2375	(0.04584059-0.000720699j)	-26.7739	0.0458463	-0.900722	-0.0157206	(0.05100016-0.01886987j)	-25.2914	0.0543791	-20.3043	-0.354377	(0.03826099-0.01225284j)	-27.9209	0.0401751	-17.7573	-0.309924	(0.03277032+0.0007407234000000001j)	-29.6882	0.0327787	1.29486	0.0225996	(0.04623968-0.008111254j)	-26.5681	0.0469457	-9.94946	-0.173651	(0.0359098-0.01874908j)	-27.8488	0.0405098	-27.5698	-0.481183	(0.02912831-0.009134538j)	-30.3063	0.030527	-17.4112	-0.303884	(0.02249727-0.01936791j)	-30.549	0.0296857	-40.7252	-0.710788	(0.0464773-0.029843j)	-25.1559	0.0552335	-32.7045	-0.5708	(0.05685795-0.01947303j)	-24.4225	0.0601001	-18.9056
5.238	(0.04455258-0.003214274j)	-27	0.0446684	-4.12649	-0.0720208	(0.04907875-0.02021518j)	-25.5016	0.053079	-22.3864	-0.390716	(0.03644917-0.01402757j)	-28.1664	0.0390553	-21.0494	-0.367381	(0.03183661-0.0010286509999999998j)	-29.9369	0.0318532	-1.8506	-0.0322991	(0.04476861-0.01021961j)	-26.7599	0.0459202	-12.8589	-0.224431	(0.03375276-0.02183031j)	-27.9161	0.0401972	-32.8936	-0.574102	(0.02698085-0.01034477j)	-30.7832	0.028896	-20.9774	-0.366125	(0.02050071-0.02122826j)	-30.6002	0.0295113	-45.9989	-0.802832	(0.04527353-0.03107001j)	-25.2071	0.0549094	-34.4608	-0.601454	(0.05366533-0.02071234j)	-24.8031	0.0575236	-21.1043
5.2385	(0.04248779-0.005396237j)	-27.3652	0.0428291	-7.2382	-0.12633	(0.0454267-0.02291525j)	-25.8692	0.0508792	-26.7684	-0.467197	(0.03282658-0.01613472j)	-28.7357	0.0365775	-26.1748	-0.456836	(0.02850106-0.002915188j)	-30.8576	0.0286498	-5.8401	-0.101929	(0.04163177-0.01219222j)	-27.2541	0.0433803	-16.3231	-0.284892	(0.03155737-0.02402193j)	-28.0329	0.0396601	-37.2789	-0.65064	(0.02442289-0.01334161j)	-31.1099	0.0278294	-28.6467	-0.499979	(0.01859881-0.02410768j)	-30.3288	0.0304483	-52.3502	-0.913684	(0.04184046-0.03492719j)	-25.2717	0.0545026	-39.8541	-0.695586	(0.05155463-0.02315423j)	-24.9567	0.0565155	-24.1858
5.239	(0.04091952-0.008390252j)	-27.5825	0.0417708	-11.5875	-0.20224	(0.04456001-0.02545419j)	-25.7946	0.0513177	-29.7365	-0.518999	(0.03206369-0.01970562j)	-28.4882	0.037635	-31.5739	-0.551069	(0.02714807-0.006193331j)	-31.1049	0.0278456	-12.851	-0.224293	(0.04089792-0.01627683j)	-27.1274	0.0440179	-21.7019	-0.37877	(0.03093089-0.02561594j)	-27.9239	0.0401609	-39.6304	-0.691681	(0.02382339-0.01618298j)	-30.8121	0.0288	-34.1879	-0.596691	(0.01695041-0.02588577j)	-30.1891	0.0309417	-56.7826	-0.991043	(0.04011138-0.03696323j)	-25.2648	0.0545454	-42.661	-0.744575	(0.05069177-0.02657076j)	-24.847	0.0572334	-27.6619
5.2395	(0.03764758-0.01018937j)	-28.1782	0.0390021	-15.1444	-0.264319	(0.04221087-0.0278571j)	-25.9214	0.0505745	-33.4228	-0.583339	(0.03052409-0.02174274j)	-28.5249	0.0374762	-35.4628	-0.618943	(0.02506654-0.00798169j)	-31.5987	0.0263066	-17.6625	-0.308269	(0.03775299-0.01830016j)	-27.5444	0.0419545	-25.861	-0.45136	(0.0265651-0.02866001j)	-28.1613	0.0390781	-47.1724	-0.823314	(0.02004931-0.01817164j)	-31.3538	0.0270589	-42.1875	-0.736311	(0.01397074-0.02780971j)	-30.1387	0.0311217	-63.3265	-1.10526	(0.0375678-0.03976171j)	-25.2399	0.0547022	-46.6251	-0.813761	(0.04771456-0.02848503j)	-25.1031	0.0555705	-30.8367
5.24	(0.0367457-0.01337121j)	-28.1558	0.0391029	-19.9957	-0.348991	(0.0402642-0.02887412j)	-26.0996	0.0495472	-35.6449	-0.622121	(0.02929913-0.02323333j)	-28.5442	0.0373929	-38.4134	-0.67044	(0.02405482-0.009264707j)	-31.7753	0.0257773	-21.0642	-0.367639	(0.03790427-0.02056821j)	-27.3054	0.0431252	-28.4858	-0.497172	(0.02590786-0.03037927j)	-27.9748	0.0399264	-49.542	-0.864671	(0.02046114-0.01938216j)	-31	0.0281838	-43.4488	-0.758324	(0.01424616-0.03023956j)	-29.518	0.0334273	-64.7744	-1.13053	(0.03675224-0.0415323j)	-25.1206	0.0554586	-48.4941	-0.846383	(0.04637862-0.0304867j)	-25.1139	0.0555015	-33.3187
5.2405	(0.03534449-0.01517737j)	-28.2986	0.0384654	-23.2393	-0.405602	(0.03928087-0.03177233j)	-25.9304	0.050522	-38.9677	-0.680114	(0.02739939-0.02637497j)	-28.3972	0.0380311	-43.9086	-0.76635	(0.02192992-0.01143794j)	-32.1343	0.0247335	-27.5451	-0.480753	(0.03551427-0.02284337j)	-27.4883	0.0422266	-32.7498	-0.571592	(0.02419228-0.03248369j)	-27.8504	0.0405025	-53.323	-0.930663	(0.01768077-0.02257456j)	-30.8501	0.0286744	-51.9314	-0.906373	(0.0107811-0.03190669j)	-29.4528	0.0336789	-71.3302	-1.24495	(0.03445968-0.04454627j)	-24.9869	0.0563191	-52.2755	-0.91238	(0.04460093-0.03349709j)	-25.0706	0.055779	-36.908
5.241	(0.03524618-0.01842104j)	-28.009	0.0397697	-27.5933	-0.481595	(0.03672077-0.03750215j)	-25.5991	0.0524864	-45.6032	-0.795925	(0.02585897-0.0303483j)	-27.9868	0.0398711	-49.5666	-0.8651	(0.02171785-0.01554983j)	-31.4663	0.0267107	-35.6024	-0.621379	(0.03454087-0.02634001j)	-27.2426	0.0434381	-37.3282	-0.651501	(0.02343761-0.03611816j)	-27.3193	0.0430563	-57.0199	-0.995184	(0.01634434-0.02494852j)	-30.5082	0.0298256	-56.7703	-0.990828	(0.009480029-0.03652961j)	-28.464	0.0377397	-75.4517	-1.31688	(0.03316625-0.04682994j)	-24.824	0.057385	-54.6928	-0.95457	(0.04371964-0.0379638j)	-24.7461	0.0579021	-40.9693
5.2415	(0.03376713-0.02238347j)	-27.8483	0.0405122	-33.5395	-0.585375	(0.03596584-0.03951566j)	-25.4439	0.0534325	-47.6926	-0.832393	(0.02596967-0.03223243j)	-27.6615	0.0413927	-51.1416	-0.892589	(0.02053223-0.01865749j)	-31.1369	0.027743	-42.2612	-0.737597	(0.03385491-0.02837425j)	-27.0969	0.044173	-39.9668	-0.697553	(0.02202895-0.03865222j)	-27.035	0.044489	-60.32	-1.05278	(0.01658732-0.02720791j)	-29.9336	0.0318655	-58.6314	-1.02331	(0.009110726-0.03816279j)	-28.1265	0.0392352	-76.5729	-1.33645	(0.03222806-0.04957423j)	-24.564	0.0591291	-56.9722	-0.994353	(0.04307994-0.04175796j)	-24.4374	0.0599967	-44.1073
5.242	(0.03422958-0.02579806j)	-27.3584	0.0428626	-37.0045	-0.64585	(0.03557292-0.04363566j)	-24.9901	0.0562983	-50.8122	-0.88684	(0.02465634-0.03638216j)	-27.1408	0.0439499	-55.8743	-0.975191	(0.02065082-0.02238264j)	-30.3271	0.0304539	-47.3045	-0.82562	(0.03390468-0.03337102j)	-26.4529	0.0475726	-44.5455	-0.777466	(0.02172663-0.04301437j)	-26.3408	0.0481901	-63.2016	-1.10308	(0.01478223-0.03147864j)	-29.1742	0.0347767	-64.8455	-1.13177	(0.00870992-0.0427369j)	-27.2072	0.0436154	-78.4807	-1.36975	(0.03189409-0.05447964j)	-23.9954	0.0631289	-59.654	-1.04116	(0.04176665-0.04524989j)	-24.2113	0.0615793	-47.2923
5.2425	(0.03266713-0.0303422j)	-27.0163	0.0445846	-42.8868	-0.748517	(0.0357837-0.04743062j)	-24.5221	0.059415	-52.9675	-0.924458	(0.02451243-0.03945902j)	-26.6597	0.0464529	-58.1509	-1.01493	(0.01993456-0.02503352j)	-29.8967	0.032001	-51.4692	-0.898307	(0.0328642-0.03851706j)	-25.9115	0.0506322	-49.5279	-0.864426	(0.0214028-0.04644683j)	-25.8246	0.0511409	-65.2596	-1.139	(0.01487788-0.03499436j)	-28.3984	0.0380257	-66.9672	-1.1688	(0.007858864-0.04513322j)	-26.7804	0.0458123	-80.1224	-1.3984	(0.03181493-0.05815762j)	-23.5709	0.066291	-61.3193	-1.07022	(0.04177674-0.04862874j)	-23.8615	0.0641097	-49.3343
5.243	(0.03350915-0.03297247j)	-26.556	0.0470111	-44.5375	-0.777326	(0.03508791-0.05093502j)	-24.1731	0.0618509	-55.438	-0.967575	(0.02379837-0.04338776j)	-26.1104	0.049486	-61.255	-1.0691	(0.02041533-0.02864875j)	-29.0744	0.0351786	-54.526	-0.951659	(0.03228806-0.04015344j)	-25.7597	0.0515249	-51.1967	-0.89355	(0.020747-0.04940773j)	-25.4188	0.053587	-67.2218	-1.17324	(0.01446009-0.03852214j)	-27.7133	0.0411467	-69.4253	-1.2117	(0.008518215-0.04824886j)	-26.197	0.048995	-79.9877	-1.39605	(0.0301254-0.06122702j)	-23.3196	0.068237	-63.8015	-1.11355	(0.04130333-0.05200402j)	-23.5552	0.0664107	-51.5422
5.2435	(0.0337957-0.03553565j)	-26.189	0.0490401	-46.4376	-0.810489	(0.03512191-0.05432392j)	-23.7834	0.0646888	-57.1162	-0.996866	(0.02345573-0.04561402j)	-25.7991	0.0512914	-62.7868	-1.09584	(0.02001721-0.03167221j)	-28.5269	0.0374676	-57.7066	-1.00717	(0.03394317-0.04277191j)	-25.2555	0.0546038	-51.565	-0.899979	(0.02076929-0.05128152j)	-25.1411	0.0553277	-67.9518	-1.18598	(0.01511019-0.04075328j)	-27.2373	0.0434643	-69.6566	-1.21574	(0.008574123-0.05120338j)	-25.6939	0.0519163	-80.4939	-1.40488	(0.03120352-0.0643858j)	-22.908	0.0715485	-64.1436	-1.11952	(0.04177781-0.05517122j)	-23.1973	0.0692044	-52.8656
5.244	(0.03412982-0.03869069j)	-25.7482	0.0515928	-48.5838	-0.847948	(0.03603506-0.05506663j)	-23.6343	0.0658093	-56.7997	-0.991341	(0.02446732-0.04658172j)	-25.5775	0.0526166	-62.289	-1.08715	(0.02247477-0.03479982j)	-27.6545	0.0414264	-57.1444	-0.997358	(0.03431319-0.04566993j)	-24.8636	0.0571239	-53.0814	-0.926445	(0.02103283-0.05563847j)	-24.5124	0.0594813	-69.2921	-1.20937	(0.01511804-0.04316895j)	-26.7941	0.0457396	-70.6994	-1.23394	(0.009477984-0.05295321j)	-25.3852	0.0537947	-79.8522	-1.39368	(0.03100367-0.0662595j)	-22.7152	0.0731543	-64.9245	-1.13315	(0.04209865-0.05827506j)	-22.8665	0.0718907	-54.1552
5.2445	(0.03445366-0.04163964j)	-25.3448	0.0540455	-50.3948	-0.879555	(0.03553022-0.05827818j)	-23.3173	0.068255	-58.6308	-1.0233	(0.02493251-0.05069438j)	-24.96	0.0564938	-63.8111	-1.11371	(0.02193274-0.0356691j)	-27.5614	0.0418728	-58.4129	-1.0195	(0.03321043-0.05006947j)	-24.4251	0.0600823	-56.4442	-0.985137	(0.02090387-0.0573406j)	-24.2888	0.0610321	-69.9704	-1.22121	(0.01573153-0.04537335j)	-26.371	0.0480231	-70.8779	-1.23705	(0.009123079-0.05611131j)	-24.9057	0.0568481	-80.7651	-1.40962	(0.03123125-0.06966854j)	-22.344	0.0763485	-65.8541	-1.14937	(0.04192005-0.05935464j)	-22.7734	0.0726654	-54.7678
5.245	(0.03534934-0.0441137j)	-24.9545	0.0565296	-51.294	-0.895249	(0.03668866-0.06250323j)	-22.7962	0.0724756	-59.5876	-1.04	(0.02479463-0.053865j)	-24.5392	0.0592977	-65.2829	-1.1394	(0.02153471-0.03867322j)	-27.0789	0.0442647	-60.8893	-1.06272	(0.03415745-0.05146785j)	-24.1843	0.0617711	-56.4291	-0.984874	(0.02155032-0.0595137j)	-23.9726	0.0632953	-70.0943	-1.22338	(0.01650908-0.04853964j)	-25.8027	0.0512703	-71.216	-1.24295	(0.009139984-0.05795352j)	-24.6317	0.0586698	-81.0376	-1.41437	(0.03019046-0.07298414j)	-22.0494	0.078982	-67.5272	-1.17857	(0.04218138-0.06393168j)	-22.3162	0.0765933	-56.5836
5.2455	(0.03608671-0.04707882j)	-24.5362	0.0593183	-52.5292	-0.916808	(0.03693805-0.06504238j)	-22.5221	0.0747993	-60.4074	-1.05431	(0.02566993-0.0554883j)	-24.2737	0.0611383	-65.1739	-1.1375	(0.02414146-0.04271044j)	-26.1853	0.0490611	-60.5233	-1.05633	(0.03558118-0.0548141j)	-23.6951	0.0653499	-57.0114	-0.995037	(0.02316156-0.06339566j)	-23.4147	0.0674942	-69.9303	-1.22051	(0.01712733-0.05033005j)	-25.4876	0.0531645	-71.2065	-1.24279	(0.0105137-0.06024288j)	-24.2716	0.0611534	-80.1003	-1.39801	(0.03185885-0.07637838j)	-21.644	0.0827565	-67.3581	-1.17562	(0.04339799-0.06724079j)	-21.935	0.0800294	-57.1613
5.246	(0.03721384-0.04923739j)	-24.1917	0.0617186	-52.9178	-0.923591	(0.03712982-0.06805129j)	-22.2115	0.0775216	-61.3824	-1.07133	(0.02732113-0.06016805j)	-23.5985	0.0660805	-65.5781	-1.14455	(0.02518984-0.04468418j)	-25.7985	0.0512953	-60.5887	-1.05747	(0.03701031-0.05791282j)	-23.2572	0.0687289	-57.4186	-1.00214	(0.02370508-0.0648846j)	-23.213	0.0690792	-69.9306	-1.22052	(0.01806295-0.05430274j)	-24.8478	0.0572281	-71.6011	-1.24968	(0.01088547-0.06347259j)	-23.8224	0.0643992	-80.2685	-1.40095	(0.03201358-0.07756111j)	-21.5239	0.0839083	-67.5715	-1.17934	(0.04393963-0.06896369j)	-21.7479	0.0817721	-57.4971
5.2465	(0.03966024-0.05153422j)	-23.7379	0.0650285	-52.4185	-0.914875	(0.04001891-0.06987659j)	-21.8814	0.0805248	-60.1999	-1.05069	(0.02934603-0.05965711j)	-23.5456	0.0664843	-63.8069	-1.11364	(0.02661237-0.04621478j)	-25.4607	0.0533294	-60.0649	-1.04833	(0.03908469-0.05933895j)	-22.9682	0.0710544	-56.6284	-0.988351	(0.02628076-0.06630868j)	-22.9349	0.0713268	-68.3796	-1.19345	(0.02090614-0.05602335j)	-24.4664	0.059797	-69.536	-1.21363	(0.01380141-0.06519434j)	-23.5254	0.0666392	-78.0472	-1.36218	(0.03507767-0.080479j)	-21.131	0.0877913	-66.4495	-1.15976	(0.0464282-0.07221983j)	-21.3246	0.0858562	-57.2641
5.247	(0.04010847-0.05517762j)	-23.3224	0.0682148	-53.9867	-0.942246	(0.04192556-0.07239752j)	-21.5495	0.0836609	-59.9248	-1.04588	(0.03074338-0.06302626j)	-23.0826	0.0701246	-63.9975	-1.11697	(0.02833471-0.04932701j)	-24.8999	0.0568859	-60.1258	-1.04939	(0.03981883-0.06181726j)	-22.6705	0.0735317	-57.2129	-0.998553	(0.02729276-0.07020903j)	-22.461	0.0753273	-68.7571	-1.20004	(0.02132753-0.05818912j)	-24.1557	0.0619745	-69.8711	-1.21948	(0.01372742-0.06727503j)	-23.2658	0.0686613	-78.4672	-1.36951	(0.03480387-0.08282373j)	-20.9307	0.0898392	-67.2071	-1.17298	(0.04734251-0.07475359j)	-21.0627	0.088484	-57.6533
5.2475	(0.04246296-0.05667493j)	-22.9972	0.0708177	-53.1581	-0.927784	(0.04350455-0.07367495j)	-21.3545	0.0855608	-59.4384	-1.0374	(0.03204378-0.06499573j)	-22.7974	0.0724655	-63.7561	-1.11275	(0.03043149-0.05095397j)	-24.5316	0.0593497	-59.1529	-1.03241	(0.04197659-0.06371821j)	-22.3492	0.0763023	-56.6237	-0.98827	(0.0294163-0.07136425j)	-22.2489	0.0771892	-67.5986	-1.17982	(0.02304692-0.05845249j)	-24.0364	0.062832	-68.4814	-1.19523	(0.01601588-0.06832211j)	-23.0764	0.0701742	-76.8071	-1.34054	(0.0378778-0.08411919j)	-20.7003	0.0922538	-65.7586	-1.1477	(0.04908792-0.07642962j)	-20.8349	0.0908356	-57.2889
5.248	(0.04502508-0.05911288j)	-22.5794	0.0743074	-52.7042	-0.919862	(0.04463679-0.07630988j)	-21.0704	0.0884061	-59.6749	-1.04152	(0.03380102-0.0680025j)	-22.3906	0.0759398	-63.5701	-1.10951	(0.03268164-0.05233132j)	-24.1946	0.0616981	-58.0146	-1.01255	(0.04496245-0.06651305j)	-21.9074	0.0802845	-55.9415	-0.976364	(0.03096967-0.07326148j)	-21.9885	0.0795384	-67.0849	-1.17085	(0.02608401-0.06236846j)	-23.4006	0.0676033	-67.3041	-1.17468	(0.01812314-0.07100172j)	-22.7005	0.0732782	-75.681	-1.32088	(0.03924891-0.08748695j)	-20.3647	0.0958877	-65.8378	-1.14909	(0.05110533-0.07827127j)	-20.5858	0.0934781	-56.8584
5.2485	(0.04773318-0.06050825j)	-22.2624	0.0770695	-51.7311	-0.902879	(0.04635691-0.07819007j)	-20.8288	0.0908991	-59.3374	-1.03563	(0.036403-0.06900337j)	-22.1562	0.0780169	-62.1859	-1.08535	(0.03500418-0.05442574j)	-23.7805	0.0647105	-57.2527	-0.999248	(0.04628677-0.069011j)	-21.6084	0.0830962	-56.1496	-0.979996	(0.03290723-0.07497517j)	-21.7366	0.0818789	-66.3029	-1.1572	(0.02738767-0.06346081j)	-23.2081	0.0691184	-66.6565	-1.16338	(0.01915216-0.07222883j)	-22.5307	0.0747249	-75.1492	-1.3116	(0.04108093-0.08805677j)	-20.2495	0.0971681	-64.9896	-1.13428	(0.05169569-0.08010993j)	-20.4143	0.0953417	-57.1655
5.249	(0.04943034-0.06277704j)	-21.9489	0.0799019	-51.7833	-0.903789	(0.04855029-0.08043716j)	-20.5417	0.0939535	-58.8856	-1.02775	(0.03877905-0.07040041j)	-21.8977	0.0803743	-61.1525	-1.06731	(0.03710603-0.05655588j)	-23.3957	0.0676419	-56.7313	-0.990148	(0.04874649-0.07010083j)	-21.3725	0.0853835	-55.1861	-0.96318	(0.0356486-0.07657016j)	-21.4668	0.0844619	-65.0348	-1.13507	(0.03020939-0.06449902j)	-22.9476	0.0712231	-64.903	-1.13277	(0.02265346-0.07505812j)	-22.1134	0.0784022	-73.2055	-1.27768	(0.04304357-0.09022832j)	-20.0027	0.0999695	-64.4964	-1.12568	(0.05462084-0.0829296j)	-20.0609	0.0993013	-56.6295
5.2495	(0.05192615-0.0634188j)	-21.7274	0.081965	-50.69	-0.884708	(0.05018258-0.08107299j)	-20.4138	0.0953474	-58.2433	-1.01654	(0.04034131-0.07096187j)	-21.7633	0.0816273	-60.3821	-1.05387	(0.0398702-0.05726999j)	-23.1252	0.0697817	-55.1552	-0.962639	(0.04972249-0.07173914j)	-21.1811	0.0872859	-55.2741	-0.964715	(0.03574728-0.07725533j)	-21.3989	0.0851249	-65.1693	-1.13742	(0.0322261-0.06626245j)	-22.6526	0.0736833	-64.0645	-1.11814	(0.02380037-0.07490565j)	-22.092	0.0785959	-72.373	-1.26315	(0.04466669-0.09112127j)	-19.8724	0.10148	-63.8864	-1.11503	(0.05620428-0.08348308j)	-19.9446	0.10064	-56.0499
5.25	(0.05381973-0.06501854j)	-21.4728	0.0844036	-50.3834	-0.879356	(0.05266748-0.08223055j)	-20.2065	0.097651	-57.361	-1.00114	(0.0428551-0.07215618j)	-21.5224	0.083923	-59.293	-1.03486	(0.04191919-0.05834016j)	-22.8728	0.0718387	-54.3016	-0.947742	(0.05303672-0.07185544j)	-20.9821	0.089309	-53.5689	-0.934953	(0.03845378-0.07854697j)	-21.1643	0.0874547	-63.9153	-1.11553	(0.03420417-0.06726331j)	-22.4456	0.0754604	-63.0461	-1.10036	(0.02614281-0.07526902j)	-21.973	0.0796798	-70.8466	-1.23651	(0.04644753-0.09208994j)	-19.7314	0.10314	-63.2349	-1.10366	(0.05825248-0.0842483j)	-19.7918	0.102426	-55.3385
5.2505	(0.05648242-0.06645431j)	-21.1882	0.0872149	-49.6373	-0.866335	(0.0548046-0.08351471j)	-20.0095	0.0998912	-56.726	-0.990056	(0.04551066-0.0739494j)	-21.2264	0.0868316	-58.3906	-1.01911	(0.04529437-0.05932913j)	-22.5403	0.0746427	-52.6404	-0.918747	(0.05385629-0.07325611j)	-20.8265	0.0909228	-53.6775	-0.936849	(0.04194715-0.07912965j)	-20.9577	0.0895604	-62.0716	-1.08335	(0.03688934-0.06734169j)	-22.2946	0.0767836	-61.2864	-1.06965	(0.02963271-0.07638147j)	-21.7313	0.0819282	-68.7959	-1.20071	(0.04868586-0.09317175j)	-19.5659	0.105125	-62.4112	-1.08928	(0.06048162-0.08656j)	-19.527	0.105597	-55.057
5.251	(0.05825172-0.06474654j)	-21.2002	0.0870941	-48.0226	-0.838153	(0.05638193-0.08314428j)	-19.9603	0.100458	-55.858	-0.974905	(0.04770447-0.07284625j)	-21.202	0.0870764	-56.7806	-0.991009	(0.04659411-0.05803885j)	-22.5653	0.0744279	-51.2422	-0.894345	(0.05737302-0.07209334j)	-20.7114	0.0921364	-51.4867	-0.898612	(0.04418243-0.07804694j)	-20.9456	0.0896851	-60.4858	-1.05568	(0.03787386-0.06709318j)	-22.2651	0.0770449	-60.5554	-1.05689	(0.03174829-0.07473198j)	-21.8093	0.0811962	-66.9828	-1.16907	(0.04998213-0.09169584j)	-19.6232	0.104433	-61.4058	-1.07173	(0.06319569-0.08391643j)	-19.572	0.105051	-53.0174
5.2515	(0.06129472-0.0670368j)	-20.8349	0.0908349	-47.5619	-0.830112	(0.05964523-0.08471058j)	-19.6926	0.103602	-54.8504	-0.95732	(0.04976689-0.07498202j)	-20.9157	0.0899947	-56.4271	-0.984838	(0.04937718-0.05981318j)	-22.2071	0.0775611	-50.4595	-0.880685	(0.05929176-0.07323065j)	-20.5167	0.0942244	-51.0044	-0.890194	(0.04577094-0.07966974j)	-20.7354	0.0918817	-60.1223	-1.04933	(0.04203115-0.06780349j)	-21.9627	0.0797742	-58.2054	-1.01588	(0.03392392-0.07627213j)	-21.5688	0.0834762	-66.0217	-1.1523	(0.05316966-0.09435738j)	-19.3069	0.108307	-60.5991	-1.05765	(0.06528106-0.08618712j)	-19.3219	0.10812	-52.8585
5.252	(0.06332108-0.06607767j)	-20.7697	0.0915195	-46.2204	-0.806698	(0.06181846-0.08421921j)	-19.62	0.104472	-53.7206	-0.937602	(0.05084128-0.07392226j)	-20.9424	0.0897181	-55.4811	-0.968328	(0.0515886-0.06013393j)	-22.0222	0.0792305	-49.3739	-0.861737	(0.06158897-0.07466435j)	-20.2835	0.0967883	-50.4815	-0.881069	(0.04754956-0.07960815j)	-20.6558	0.0927277	-59.1503	-1.03237	(0.04439726-0.06697894j)	-21.8995	0.0803573	-56.4614	-0.985438	(0.03528683-0.07542219j)	-21.5904	0.0832686	-64.9271	-1.13319	(0.05501208-0.09452069j)	-19.2225	0.109364	-59.8001	-1.04371	(0.06667785-0.08577774j)	-19.2798	0.108645	-52.1409
5.2525	(0.0653777-0.06746j)	-20.5428	0.093942	-45.8981	-0.801072	(0.06378584-0.08416188j)	-19.5265	0.105602	-52.8417	-0.922262	(0.05290035-0.07411839j)	-20.8134	0.0910603	-54.4835	-0.950916	(0.05375641-0.05899727j)	-21.9583	0.079815	-47.6612	-0.831845	(0.0635156-0.07322136j)	-20.2708	0.0969309	-49.0601	-0.856261	(0.04948298-0.08007316j)	-20.5255	0.094129	-58.2851	-1.01727	(0.04628035-0.06752747j)	-21.7381	0.0818647	-55.575	-0.969966	(0.03715485-0.07477345j)	-21.5667	0.0834958	-63.5773	-1.10963	(0.05675897-0.09440996j)	-19.1597	0.110158	-58.9858	-1.0295	(0.06863905-0.08579654j)	-19.1821	0.109874	-51.3395
5.253	(0.0673175-0.0664423j)	-20.4836	0.0945845	-44.6251	-0.778855	(0.06610945-0.08377431j)	-19.4353	0.106717	-51.7217	-0.902714	(0.05573012-0.07479182j)	-20.605	0.093272	-53.3089	-0.930415	(0.0571036-0.05786166j)	-21.7988	0.0812945	-45.3778	-0.791992	(0.06679985-0.07345365j)	-20.0623	0.0992857	-47.7161	-0.832804	(0.05179677-0.07872991j)	-20.5152	0.0942407	-56.6589	-0.988884	(0.04859336-0.06749281j)	-21.6011	0.0831661	-54.2469	-0.946788	(0.04018745-0.0749488j)	-21.4072	0.0850432	-61.7998	-1.07861	(0.05914426-0.09288911j)	-19.1627	0.11012	-57.5143	-1.00381	(0.07083742-0.08639672j)	-19.037	0.111724	-50.6514
5.2535	(0.06989767-0.06464072j)	-20.4267	0.0952056	-42.7624	-0.746344	(0.06762082-0.08189585j)	-19.4771	0.106205	-50.4538	-0.880584	(0.05803954-0.07188378j)	-20.6875	0.0923898	-51.0823	-0.891555	(0.05962323-0.05797278j)	-21.6016	0.0831611	-44.1959	-0.771364	(0.06881862-0.0715643j)	-20.0624	0.0992847	-46.1205	-0.804954	(0.05392961-0.07672029j)	-20.5579	0.0937785	-54.8952	-0.958101	(0.05010424-0.06447386j)	-21.7605	0.0816536	-52.1483	-0.91016	(0.04195896-0.07231322j)	-21.5554	0.0836048	-59.876	-1.04503	(0.06111543-0.09118082j)	-19.1905	0.109768	-56.1674	-0.980306	(0.07344813-0.08498409j)	-18.9905	0.112325	-49.1645
5.254	(0.07183321-0.06438196j)	-20.3128	0.0964627	-41.8689	-0.730751	(0.06887168-0.08075199j)	-19.483	0.106133	-49.5398	-0.864633	(0.06051334-0.07142577j)	-20.5732	0.0936136	-49.7281	-0.867918	(0.06124684-0.0563185j)	-21.5971	0.0832043	-42.5996	-0.743503	(0.06968562-0.07109611j)	-20.0389	0.0995527	-45.574	-0.795417	(0.0567482-0.07685954j)	-20.3964	0.0955392	-53.5602	-0.934802	(0.05266207-0.06429721j)	-21.6068	0.0831109	-50.6811	-0.884552	(0.04363278-0.07238538j)	-21.4609	0.084519	-58.9191	-1.02833	(0.06332128-0.09092344j)	-19.1092	0.1108	-55.1457	-0.962474	(0.07545725-0.08302976j)	-19.0005	0.112195	-47.7355
5.2545	(0.0740859-0.0626603j)	-20.2618	0.0970311	-40.2238	-0.702038	(0.07228123-0.080094j)	-19.3406	0.107887	-47.9352	-0.836627	(0.06367476-0.07015513j)	-20.4691	0.0947429	-47.7722	-0.833783	(0.06474743-0.05404911j)	-21.4791	0.0843418	-39.8541	-0.695585	(0.07276692-0.0697232j)	-19.9326	0.100779	-43.7763	-0.76404	(0.05879348-0.07440903j)	-20.4608	0.0948334	-51.6864	-0.902097	(0.0554357-0.06312761j)	-21.5131	0.0840132	-48.7119	-0.850183	(0.04656433-0.07034663j)	-21.4771	0.0843616	-56.4984	-0.986082	(0.06446128-0.0897142j)	-19.135	0.110471	-54.3021	-0.94775	(0.07725503-0.08357228j)	-18.8764	0.11381	-47.2494
5.255	(0.07634614-0.0617925j)	-20.1561	0.0982194	-38.9858	-0.68043	(0.07311423-0.08011005j)	-19.2947	0.108459	-47.6142	-0.831024	(0.06503892-0.06900582j)	-20.4615	0.0948254	-46.6951	-0.814983	(0.06588152-0.05426015j)	-21.376	0.0853495	-39.4749	-0.688968	(0.07494894-0.07064885j)	-19.7434	0.102998	-43.3083	-0.755873	(0.06016193-0.07432812j)	-20.3886	0.0956249	-51.0129	-0.890344	(0.0574183-0.06195836j)	-21.4656	0.0844731	-47.178	-0.823411	(0.04850323-0.06981661j)	-21.4105	0.0850113	-55.2114	-0.963621	(0.06715588-0.08924536j)	-19.0397	0.11169	-53.0391	-0.925706	(0.07941844-0.08295858j)	-18.7977	0.114845	-46.249
5.2555	(0.07933454-0.06054776j)	-20.0174	0.0997998	-37.3507	-0.651893	(0.07573994-0.07870911j)	-19.233	0.109232	-46.1013	-0.80462	(0.06701356-0.06903265j)	-20.3356	0.0962098	-45.8503	-0.800238	(0.06824163-0.0534583j)	-21.2409	0.0866874	-38.074	-0.664517	(0.07588368-0.06769967j)	-19.8541	0.101694	-41.7378	-0.728461	(0.06280921-0.07401668j)	-20.2579	0.0970745	-49.6827	-0.867126	(0.05876841-0.06160242j)	-21.3975	0.0851386	-46.3487	-0.808938	(0.04948755-0.06780639j)	-21.5201	0.0839448	-53.8767	-0.940326	(0.06881323-0.08773197j)	-19.0545	0.1115	-51.8909	-0.905667	(0.07960736-0.08198514j)	-18.8409	0.114276	-45.843
5.256	(0.07968509-0.06055114j)	-19.993	0.100081	-37.2305	-0.649795	(0.07773949-0.07740381j)	-19.1956	0.109703	-44.876	-0.783234	(0.06808852-0.06638277j)	-20.437	0.0950932	-44.2732	-0.772714	(0.07061502-0.04993766j)	-21.2608	0.0864884	-35.2673	-0.61553	(0.07753748-0.06673236j)	-19.8025	0.1023	-40.7168	-0.710643	(0.0642035-0.0712222j)	-20.3646	0.095889	-47.9668	-0.837179	(0.06090502-0.05946146j)	-21.3996	0.0851181	-44.3129	-0.773406	(0.05194635-0.06671581j)	-21.4573	0.0845543	-52.0949	-0.909228	(0.07053123-0.08529159j)	-19.1189	0.110677	-50.4112	-0.879842	(0.08260339-0.07917775j)	-18.8298	0.114422	-43.787
5.2565	(0.08123665-0.05817718j)	-20.007	0.0999199	-35.6081	-0.621479	(0.07782324-0.07558172j)	-19.2926	0.108485	-44.1629	-0.770787	(0.06932619-0.06387711j)	-20.5127	0.0942677	-42.6575	-0.744513	(0.07215508-0.04887546j)	-21.1946	0.0871503	-34.1124	-0.595374	(0.07797152-0.06590153j)	-19.8203	0.102091	-40.2045	-0.701701	(0.06523462-0.07022757j)	-20.368	0.0958513	-47.1109	-0.82224	(0.06206242-0.05722405j)	-21.4713	0.0844176	-42.6773	-0.744859	(0.05200623-0.06430845j)	-21.6493	0.0827057	-51.0375	-0.890773	(0.07070886-0.08442141j)	-19.1626	0.110121	-50.0515	-0.873563	(0.08260486-0.07878576j)	-18.8503	0.114152	-43.6444
5.257	(0.08193945-0.05599727j)	-20.0657	0.099246	-34.3486	-0.599497	(0.07919051-0.0719654j)	-19.4119	0.107005	-42.2634	-0.737635	(0.0698408-0.06202808j)	-20.5922	0.0934089	-41.6094	-0.726221	(0.07242195-0.04700377j)	-21.2759	0.0863382	-32.9846	-0.575691	(0.08032016-0.06239137j)	-19.8531	0.101706	-37.8395	-0.660423	(0.06669647-0.06761222j)	-20.448	0.0949728	-45.3907	-0.792216	(0.06313256-0.0546989j)	-21.5629	0.0835326	-40.9061	-0.713946	(0.05376608-0.06093507j)	-21.802	0.0812642	-48.5764	-0.847818	(0.07095435-0.08148756j)	-19.3275	0.10805	-48.9527	-0.854385	(0.08374494-0.07524378j)	-18.9706	0.112583	-41.9393
5.2575	(0.08287101-0.05379581j)	-20.1048	0.0988008	-32.9897	-0.575778	(0.07920478-0.07003547j)	-19.5162	0.105728	-41.4842	-0.724035	(0.07146434-0.05963632j)	-20.623	0.0930787	-39.8447	-0.695421	(0.07298803-0.04434545j)	-21.3705	0.0854036	-31.2817	-0.545968	(0.08134898-0.05953271j)	-19.9303	0.100806	-36.1974	-0.631763	(0.06652582-0.06430535j)	-20.6748	0.0925249	-44.0277	-0.768428	(0.06489629-0.05264877j)	-21.5593	0.0835669	-39.0516	-0.681579	(0.0544671-0.05895159j)	-21.9098	0.0802618	-47.2643	-0.824917	(0.07170626-0.07972623j)	-19.3938	0.107229	-48.0316	-0.838309	(0.08513891-0.07418862j)	-18.944	0.112927	-41.0683
5.258	(0.08483411-0.05177243j)	-20.0537	0.0993842	-31.3948	-0.547943	(0.08035717-0.06838923j)	-19.5333	0.105519	-40.4	-0.705112	(0.07184915-0.05765467j)	-20.7128	0.0921214	-38.745	-0.676227	(0.07392851-0.04203901j)	-21.407	0.0850453	-29.6245	-0.517045	(0.08135953-0.05763898j)	-20.0254	0.0997077	-35.3156	-0.616373	(0.06675237-0.06229335j)	-20.7902	0.0913036	-43.021	-0.750858	(0.06556334-0.0509223j)	-21.6168	0.0830159	-37.8361	-0.660364	(0.05511551-0.05639227j)	-22.0636	0.0788531	-45.656	-0.796848	(0.07170247-0.07729984j)	-19.5403	0.105435	-47.1513	-0.822946	(0.08475375-0.07257274j)	-19.0483	0.11158	-40.5727
5.2585	(0.08513159-0.04789575j)	-20.2039	0.09768	-29.3625	-0.512472	(0.08100752-0.06632762j)	-19.6013	0.104698	-39.3101	-0.68609	(0.07186579-0.05318699j)	-20.9726	0.0894066	-36.5047	-0.637127	(0.07566205-0.03854734j)	-21.4203	0.0849155	-26.9974	-0.471193	(0.08260224-0.05538336j)	-20.0478	0.0994507	-33.8412	-0.59064	(0.06859253-0.05969529j)	-20.8258	0.0909311	-41.0327	-0.716155	(0.0664167-0.0464645j)	-21.8243	0.0810563	-34.9763	-0.610451	(0.05627958-0.0526724j)	-22.2608	0.0770829	-43.1037	-0.752302	(0.07267331-0.07377403j)	-19.6964	0.103557	-45.4306	-0.792914	(0.08572846-0.06820693j)	-19.2076	0.109552	-38.5063
5.259	(0.08473817-0.04699864j)	-20.2736	0.0968991	-29.0142	-0.506394	(0.08018856-0.06395295j)	-19.7798	0.102568	-38.5735	-0.673234	(0.07249575-0.05212937j)	-20.9837	0.0892922	-35.7187	-0.623409	(0.07394199-0.0377818j)	-21.6147	0.0830354	-27.0655	-0.472381	(0.08108686-0.05367864j)	-20.2427	0.0972444	-33.5041	-0.584757	(0.06704481-0.05754069j)	-21.0757	0.0883512	-40.6376	-0.70926	(0.06482363-0.04508053j)	-22.0521	0.0789579	-34.816	-0.607655	(0.05515614-0.0516139j)	-22.4365	0.0755394	-43.0998	-0.752234	(0.07258376-0.0722085j)	-19.7954	0.102384	-44.8515	-0.782806	(0.08429698-0.06710315j)	-19.3521	0.107744	-38.5209
5.2595	(0.08524484-0.04430044j)	-20.3484	0.0960688	-27.4602	-0.479271	(0.08099815-0.06179206j)	-19.8385	0.101877	-37.3394	-0.651695	(0.07235914-0.05039329j)	-21.0928	0.0881778	-34.8546	-0.608328	(0.07541199-0.03545796j)	-21.5838	0.0833321	-25.1824	-0.439516	(0.08304029-0.05066934j)	-20.2397	0.0972783	-31.3906	-0.54787	(0.06752583-0.05498933j)	-21.2013	0.0870837	-39.1575	-0.683427	(0.0663918-0.04293302j)	-22.0404	0.079064	-32.8892	-0.574025	(0.0566591-0.04917023j)	-22.4965	0.0750198	-40.9523	-0.714752	(0.07246207-0.0694311j)	-19.9691	0.100357	-43.7763	-0.76404	(0.0854504-0.06537575j)	-19.3645	0.107591	-37.4186
5.26	(0.08466244-0.04197396j)	-20.4917	0.0944963	-26.3713	-0.460266	(0.08069485-0.05846979j)	-20.0303	0.0996513	-35.9263	-0.627032	(0.07399286-0.04769604j)	-21.1071	0.0880333	-32.806	-0.572572	(0.07571822-0.03198308j)	-21.703	0.0821959	-22.899	-0.399663	(0.08306779-0.04843079j)	-20.3406	0.0961551	-30.2434	-0.527846	(0.06851754-0.05178209j)	-21.3218	0.0858839	-37.0801	-0.647171	(0.06680082-0.04020042j)	-22.1621	0.0779642	-31.0393	-0.541739	(0.05682158-0.04575502j)	-22.7391	0.0729535	-38.8424	-0.677928	(0.07197834-0.06702509j)	-20.1443	0.0983527	-42.9592	-0.749779	(0.08523691-0.06282617j)	-19.503	0.105889	-36.3931
5.2605	(0.08407097-0.0391551j)	-20.6545	0.0927418	-24.9732	-0.435865	(0.0795773-0.0556084j)	-20.2573	0.0970816	-34.9457	-0.609918	(0.07247744-0.0445098j)	-21.4062	0.0850535	-31.5549	-0.550737	(0.07452666-0.0292206j)	-21.9327	0.0800504	-21.4093	-0.373662	(0.08199572-0.04579574j)	-20.545	0.0939178	-29.184	-0.509356	(0.06854653-0.04965048j)	-21.4486	0.0846392	-35.917	-0.626871	(0.06580891-0.03651787j)	-22.4685	0.075262	-29.0262	-0.506603	(0.05506535-0.04255992j)	-23.1484	0.0695955	-37.7004	-0.657996	(0.07100642-0.06350079j)	-20.4219	0.0952589	-41.8062	-0.729655	(0.08429985-0.05931722j)	-19.7367	0.103078	-35.132
5.261	(0.08365481-0.03661952j)	-20.7888	0.0913188	-23.6412	-0.412617	(0.07794235-0.05334614j)	-20.496	0.0944501	-34.3889	-0.6002	(0.07030129-0.04206918j)	-21.7314	0.0819273	-30.8968	-0.539252	(0.07413815-0.02650442j)	-22.0768	0.0787334	-19.672	-0.343341	(0.08016498-0.04361755j)	-20.7941	0.0912629	-28.5505	-0.4983	(0.06558672-0.04679816j)	-21.8764	0.080571	-35.509	-0.61975	(0.06453636-0.03359292j)	-22.7626	0.0727559	-27.4982	-0.479934	(0.05341922-0.03930683j)	-23.5668	0.0663222	-36.3463	-0.634363	(0.0708172-0.06151995j)	-20.5553	0.0938071	-40.9813	-0.715259	(0.08266013-0.05687759j)	-19.9707	0.100338	-34.5315
5.2615	(0.08281194-0.03351493j)	-20.9794	0.0893368	-22.0337	-0.384561	(0.07831611-0.05031309j)	-20.6224	0.093085	-32.7182	-0.571039	(0.0707381-0.03807063j)	-21.9022	0.0803321	-28.2888	-0.493732	(0.07489657-0.02404691j)	-22.0847	0.0786623	-17.8002	-0.310672	(0.08096568-0.04136893j)	-20.8266	0.0909221	-27.0645	-0.472364	(0.0652092-0.04362006j)	-22.1078	0.0784535	-33.7796	-0.589564	(0.06518631-0.03012594j)	-22.8762	0.0718111	-24.8041	-0.432913	(0.05430585-0.03619213j)	-23.7069	0.065261	-33.6815	-0.587853	(0.07036883-0.05817442j)	-20.7904	0.0913019	-39.5808	-0.690815	(0.08309153-0.05507167j)	-20.0274	0.099685	-33.5357
5.262	(0.08123225-0.0332911j)	-21.1312	0.0877894	-22.2851	-0.388948	(0.0763175-0.04856801j)	-20.8708	0.0904611	-32.4724	-0.566751	(0.06990109-0.0372836j)	-22.023	0.0792227	-28.0744	-0.489991	(0.0718976-0.02114652j)	-22.5054	0.0749429	-16.3897	-0.286054	(0.07782236-0.03874402j)	-21.2163	0.0869334	-26.4665	-0.461928	(0.06380591-0.04131248j)	-22.3823	0.0760126	-32.9219	-0.574595	(0.06256748-0.02886649j)	-23.2349	0.0689055	-24.767	-0.432265	(0.05274697-0.03400069j)	-24.0469	0.0627558	-32.8058	-0.57257	(0.06683243-0.05686158j)	-21.1352	0.0877486	-40.3914	-0.704963	(0.08025982-0.05261904j)	-20.3572	0.0959708	-33.2492
5.2625	(0.08023201-0.0298623j)	-21.3496	0.0856092	-20.4152	-0.356313	(0.07366185-0.04550382j)	-21.2513	0.0865833	-31.7053	-0.553361	(0.06779861-0.03413262j)	-22.3945	0.0759058	-26.7226	-0.466397	(0.07172403-0.0192144j)	-22.5857	0.0742531	-14.997	-0.261747	(0.0779834-0.03548756j)	-21.3426	0.0856783	-24.4686	-0.427058	(0.06183384-0.03824512j)	-22.7686	0.0727057	-31.7374	-0.553922	(0.0619343-0.02553508j)	-23.4796	0.0669918	-22.406	-0.391059	(0.05164035-0.03216656j)	-24.3163	0.0608392	-31.9186	-0.557085	(0.06648434-0.0547145j)	-21.2996	0.0861037	-39.4533	-0.68859	(0.07865286-0.05029089j)	-20.5971	0.0933566	-32.595
5.263	(0.07805093-0.02704798j)	-21.6599	0.0826047	-19.1134	-0.333592	(0.07320389-0.04362701j)	-21.3894	0.0852181	-30.7935	-0.537448	(0.065842-0.03142587j)	-22.7386	0.0729572	-25.5148	-0.445317	(0.07118839-0.01683606j)	-22.7155	0.0731522	-13.306	-0.232233	(0.07533526-0.03418526j)	-21.6469	0.0827287	-24.4074	-0.425989	(0.06168184-0.03652812j)	-22.8913	0.0716865	-30.6341	-0.534666	(0.06077041-0.02445179j)	-23.6745	0.0655052	-21.9181	-0.382542	(0.04951961-0.02897435j)	-24.8258	0.0573734	-30.3323	-0.529398	(0.06567232-0.05037384j)	-21.6429	0.082767	-37.4899	-0.654323	(0.07762252-0.047542j)	-20.8168	0.0910247	-31.4865
5.2635	(0.07742021-0.02603457j)	-21.7576	0.0816804	-18.5866	-0.324397	(0.07162622-0.04214654j)	-21.6073	0.0831062	-30.4735	-0.531864	(0.0644686-0.03049906j)	-22.9359	0.071319	-25.3181	-0.441884	(0.0698375-0.01628472j)	-22.8883	0.071711	-13.1257	-0.229087	(0.07433874-0.03160721j)	-21.854	0.0807791	-23.0341	-0.402022	(0.05989371-0.03325919j)	-23.2851	0.0685086	-29.0436	-0.506906	(0.05913619-0.02269687j)	-23.9661	0.0633422	-20.9971	-0.366469	(0.0491442-0.02805059j)	-24.9458	0.0565861	-29.7169	-0.518658	(0.06395468-0.04936753j)	-21.8526	0.080792	-37.6651	-0.657379	(0.07660007-0.04688272j)	-20.9337	0.0898085	-31.4685
5.264	(0.07555272-0.02434785j)	-22.0059	0.079379	-17.8622	-0.311754	(0.06942583-0.03957442j)	-21.9477	0.079913	-29.6842	-0.518087	(0.06406128-0.02862153j)	-23.0777	0.0701644	-24.0743	-0.420176	(0.06634727-0.01256083j)	-23.4106	0.0675258	-10.7203	-0.187105	(0.07229884-0.03008558j)	-22.1238	0.0783088	-22.5936	-0.394332	(0.05787222-0.03104843j)	-23.652	0.0656749	-28.2135	-0.492419	(0.05684122-0.01990949j)	-24.4042	0.0602272	-19.3036	-0.336911	(0.04634506-0.02422103j)	-25.6312	0.0522927	-27.5926	-0.481582	(0.0612965-0.04784732j)	-22.1849	0.0777601	-37.9752	-0.662792	(0.07409947-0.04297335j)	-21.3446	0.0856589	-30.1112
5.2645	(0.07238362-0.02147651j)	-22.4408	0.0755025	-16.5258	-0.28843	(0.06548353-0.03840768j)	-22.3933	0.075916	-30.3927	-0.530452	(0.05988492-0.02703979j)	-23.6478	0.0657066	-24.3006	-0.424125	(0.06432615-0.01209522j)	-23.6814	0.0654534	-10.649	-0.18586	(0.06959798-0.02919401j)	-22.4442	0.075473	-22.7564	-0.397174	(0.05470544-0.02996786j)	-24.0997	0.0623759	-28.7141	-0.501156	(0.05420623-0.01753789j)	-24.8867	0.0569727	-17.9285	-0.312911	(0.04308113-0.02322895j)	-26.2059	0.0489445	-28.3331	-0.494507	(0.05717431-0.04646375j)	-22.6538	0.0736735	-39.0997	-0.682418	(0.07025244-0.04209875j)	-21.7343	0.0819006	-30.9321
5.265	(0.06887937-0.02010563j)	-22.8831	0.0717538	-16.2723	-0.284006	(0.06417679-0.0376981j)	-22.5651	0.0744299	-30.4304	-0.531111	(0.05751257-0.02437627j)	-24.0872	0.0624652	-22.9693	-0.40089	(0.0628249-0.009497632j)	-23.9392	0.0635388	-8.59666	-0.15004	(0.06762863-0.02741377j)	-22.7367	0.0729736	-22.0655	-0.385116	(0.05192638-0.02850246j)	-24.5485	0.0592346	-28.7624	-0.501999	(0.05202758-0.01556687j)	-25.303	0.0543065	-16.6574	-0.290727	(0.04203456-0.01981544j)	-26.6564	0.046471	-25.2396	-0.440514	(0.05538809-0.04413062j)	-22.997	0.0708192	-38.5462	-0.672758	(0.0681754-0.04112837j)	-21.9795	0.0796205	-31.1014
5.2655	(0.0672619-0.0194587j)	-23.0956	0.07002	-16.135	-0.281609	(0.06043181-0.03450231j)	-23.1494	0.0695874	-29.7233	-0.51877	(0.05437853-0.02273925j)	-24.5916	0.0589415	-22.693	-0.396068	(0.05897215-0.007983635j)	-24.5082	0.0595101	-7.70982	-0.134562	(0.06350388-0.02536889j)	-23.301	0.0683836	-21.776	-0.380063	(0.04915565-0.02749739j)	-24.9861	0.0563239	-29.2224	-0.510027	(0.04913666-0.01464008j)	-25.8025	0.0512713	-16.5912	-0.289571	(0.03787117-0.01925339j)	-27.4354	0.0424843	-26.9484	-0.470338	(0.05160183-0.04290639j)	-23.4643	0.0671097	-39.7432	-0.693649	(0.06445759-0.04012273j)	-22.3923	0.0759251	-31.9009
5.266	(0.06660581-0.01783653j)	-23.229	0.0689527	-14.9916	-0.261653	(0.05821102-0.03403598j)	-23.4228	0.0674312	-30.3148	-0.529093	(0.0528052-0.0219368j)	-24.855	0.0571805	-22.5594	-0.393736	(0.05795041-0.006764276j)	-24.6801	0.0583439	-6.65774	-0.116199	(0.06212201-0.02323397j)	-23.5665	0.0663247	-20.5061	-0.357898	(0.04783083-0.02514615j)	-25.346	0.0540381	-27.7323	-0.48402	(0.04735129-0.01264014j)	-26.1944	0.0490094	-14.9462	-0.260861	(0.0362133-0.0181772j)	-27.8468	0.0405193	-26.6543	-0.465205	(0.04955922-0.04131581j)	-23.8058	0.0645222	-39.8168	-0.694934	(0.06477271-0.03710143j)	-22.5399	0.074646	-29.8038
5.2665	(0.06128372-0.01710701j)	-23.9272	0.0636266	-15.5968	-0.272215	(0.05336893-0.03356967j)	-24.0064	0.0630489	-32.1704	-0.561479	(0.04834211-0.01996378j)	-25.6296	0.0523021	-22.4391	-0.391636	(0.05407966-0.007267056j)	-25.2616	0.0545657	-7.65338	-0.133577	(0.05729441-0.02372586j)	-24.1504	0.0620126	-22.4947	-0.392606	(0.04293305-0.02408699j)	-26.1557	0.0492283	-29.294	-0.511277	(0.04355059-0.01369386j)	-26.8107	0.0456528	-17.455	-0.304647	(0.03264615-0.01721675j)	-28.6576	0.0369078	-27.806	-0.485307	(0.04469832-0.04050075j)	-24.3911	0.0603179	-42.1794	-0.73617	(0.05851841-0.03731471j)	-23.1724	0.0694031	-32.5239
5.267	(0.05891882-0.01538022j)	-24.3086	0.0608932	-14.6301	-0.255343	(0.05057526-0.03052906j)	-24.5719	0.0590752	-31.1167	-0.543089	(0.04603505-0.01823159j)	-26.1055	0.0495138	-21.6054	-0.377085	(0.05072183-0.004232027j)	-25.866	0.0508981	-4.76948	-0.0832432	(0.05569072-0.02151592j)	-24.4801	0.0597025	-21.1239	-0.368681	(0.03991082-0.02241998j)	-26.7871	0.0457769	-29.3252	-0.511821	(0.04042128-0.01100241j)	-27.5574	0.0418919	-15.2266	-0.265755	(0.03002427-0.01492352j)	-29.4917	0.0335286	-26.4296	-0.461284	(0.04152152-0.03878976j)	-24.9097	0.0568215	-43.0519	-0.751397	(0.05481847-0.03648863j)	-23.6286	0.065852	-33.6488
5.2675	(0.05623226-0.01483977j)	-24.7079	0.0581574	-14.7834	-0.258019	(0.04819477-0.03060764j)	-24.8684	0.0570926	-32.4189	-0.565817	(0.04234624-0.0179108j)	-26.7489	0.0459783	-22.9265	-0.400142	(0.04850704-0.004236079j)	-26.2509	0.0486917	-4.99093	-0.0871082	(0.05136354-0.02186363j)	-25.0637	0.0558232	-23.0577	-0.402433	(0.03681679-0.0225304j)	-27.2977	0.0431636	-31.465	-0.549167	(0.03762674-0.01009972j)	-28.1879	0.0389586	-15.0251	-0.262237	(0.02675893-0.01359481j)	-30.4534	0.0300143	-26.9327	-0.470065	(0.03836022-0.03727727j)	-25.4347	0.0534893	-44.1797	-0.771082	(0.05141979-0.03617747j)	-24.0309	0.0628713	-35.1291
5.268	(0.05235504-0.01573673j)	-25.2452	0.054669	-16.7296	-0.291986	(0.04407671-0.0310003j)	-25.3704	0.0538867	-35.1197	-0.612955	(0.03891044-0.01951251j)	-27.2245	0.0435288	-26.6325	-0.464825	(0.04514789-0.005046854j)	-26.8533	0.0454291	-6.37833	-0.111323	(0.04858115-0.02208523j)	-25.4548	0.0533656	-24.4468	-0.426677	(0.03314774-0.02180181j)	-28.0297	0.0396748	-33.3336	-0.581781	(0.03354534-0.009892987j)	-29.1252	0.0349737	-16.4315	-0.286784	(0.02316317-0.01506999j)	-31.1711	0.027634	-33.0481	-0.576798	(0.03613019-0.03762083j)	-25.6532	0.0521605	-46.1579	-0.805607	(0.04878157-0.03536596j)	-24.4005	0.0602527	-35.9416
5.2685	(0.0500548-0.01428332j)	-25.6711	0.0520528	-15.9263	-0.277966	(0.04211687-0.03038262j)	-25.6913	0.051932	-35.8062	-0.624937	(0.03644563-0.01691785j)	-27.9196	0.0401808	-24.9005	-0.434595	(0.04343244-0.003690891j)	-27.2125	0.043589	-4.85733	-0.0847764	(0.04662682-0.02048929j)	-25.8605	0.0509301	-23.7222	-0.41403	(0.03036309-0.02102625j)	-28.6518	0.0369326	-34.7024	-0.60567	(0.03197323-0.009755173j)	-29.5177	0.0334283	-16.9672	-0.296133	(0.02123229-0.01310722j)	-32.0578	0.0249521	-31.6881	-0.553061	(0.03352016-0.03761965j)	-25.9536	0.0503869	-48.2981	-0.84296	(0.04589042-0.03539014j)	-24.7387	0.0579516	-37.639
5.269	(0.04648823-0.01451491j)	-26.2491	0.0487015	-17.3398	-0.302637	(0.03926415-0.03086178j)	-26.0308	0.0499412	-38.1675	-0.666148	(0.03466203-0.01801682j)	-28.1643	0.0390648	-27.4648	-0.47935	(0.04011642-0.004465262j)	-27.8801	0.0403642	-6.35131	-0.110851	(0.04371685-0.0229986j)	-26.1259	0.0493974	-27.748	-0.484294	(0.02825005-0.02284753j)	-28.794	0.0363328	-38.9646	-0.68006	(0.02949039-0.008911601j)	-30.2269	0.0308075	-16.8141	-0.293462	(0.01833485-0.01310412j)	-32.9423	0.0225363	-35.5538	-0.620531	(0.02965189-0.03749757j)	-26.4106	0.0478048	-51.6642	-0.90171	(0.04347489-0.03621432j)	-24.9464	0.0565822	-39.7941
5.2695	(0.04344375-0.01548721j)	-26.7219	0.0461217	-19.6206	-0.342444	(0.03358686-0.03143276j)	-26.7446	0.046001	-43.1025	-0.75228	(0.03074303-0.01967429j)	-28.7543	0.0364995	-32.6176	-0.569284	(0.03657372-0.004454428j)	-28.6727	0.036844	-6.94403	-0.121196	(0.03812519-0.02229335j)	-27.0985	0.0441647	-30.3166	-0.529124	(0.02416656-0.02155419j)	-29.7939	0.0323822	-41.7298	-0.728323	(0.02551857-0.01019177j)	-31.2201	0.0274785	-21.7711	-0.379977	(0.01388082-0.01281551j)	-34.4744	0.0188922	-42.7148	-0.745515	(0.02700225-0.0381882j)	-26.6006	0.0467703	-54.7365	-0.955332	(0.03906483-0.03601641j)	-25.4925	0.0531342	-42.675
5.27	(0.03949092-0.01472072j)	-27.505	0.0421454	-20.4436	-0.356807	(0.02962053-0.03179456j)	-27.2394	0.0434542	-47.0274	-0.820782	(0.02686366-0.0193413j)	-29.6029	0.033102	-35.7531	-0.62401	(0.03232748-0.006370244j)	-29.6431	0.0329491	-11.1475	-0.194561	(0.0353232-0.02276598j)	-27.53	0.042024	-32.802	-0.572503	(0.0210362-0.02157081j)	-30.42	0.0301301	-45.7189	-0.797945	(0.02129272-0.009368676j)	-32.6668	0.0232627	-23.7492	-0.414502	(0.01007464-0.01311073j)	-35.6322	0.0165345	-52.4603	-0.915606	(0.02261469-0.0374259j)	-27.1848	0.0437278	-58.8574	-1.02726	(0.03432681-0.0357806j)	-26.0932	0.0495841	-46.1879
5.2705	(0.03697022-0.01636005j)	-27.8663	0.0404283	-23.8703	-0.416616	(0.02725029-0.03219432j)	-27.4981	0.0421788	-49.7544	-0.868378	(0.02349747-0.01892995j)	-30.4073	0.0301741	-38.8555	-0.678156	(0.03089496-0.006218745j)	-30.0298	0.0315146	-11.3808	-0.198632	(0.0332056-0.02327197j)	-27.8405	0.0405487	-35.0245	-0.611293	(0.01695351-0.02292627j)	-30.8989	0.0285138	-53.5178	-0.934062	(0.01990001-0.01003298j)	-33.0393	0.0222861	-26.7559	-0.466978	(0.007853507-0.01441115j)	-35.6967	0.0164122	-61.4114	-1.07183	(0.01911579-0.03849584j)	-27.3345	0.0429807	-63.5925	-1.1099	(0.03158992-0.03782921j)	-26.1458	0.0492846	-50.1359
5.271	(0.03457946-0.01653219j)	-28.3296	0.0383282	-25.5521	-0.445969	(0.02398189-0.03274131j)	-27.8327	0.0405848	-53.7785	-0.938612	(0.0211257-0.0186733j)	-30.9964	0.0281955	-41.4739	-0.723856	(0.0280211-0.005497043j)	-30.8863	0.0285552	-11.0991	-0.193715	(0.02965109-0.02283475j)	-28.5368	0.0374248	-37.6004	-0.656251	(0.01436404-0.02342844j)	-31.2193	0.0274812	-58.4874	-1.0208	(0.01664845-0.01085842j)	-34.0332	0.0198765	-33.1131	-0.577933	(0.004937809-0.01378717j)	-36.6864	0.0146447	-70.2953	-1.22688	(0.01439302-0.03645873j)	-28.135	0.0391969	-68.4571	-1.1948	(0.02942385-0.03682241j)	-26.5332	0.0471344	-51.3725
5.2715	(0.03113974-0.01876482j)	-28.7883	0.0363566	-31.0732	-0.542329	(0.02224105-0.03367374j)	-27.8819	0.0403557	-56.5558	-0.987085	(0.01811954-0.02121338j)	-31.0884	0.0278985	-49.4975	-0.863894	(0.02508757-0.008800107j)	-31.5069	0.0265862	-19.3296	-0.337366	(0.02684228-0.02588509j)	-28.5681	0.03729	-43.96	-0.767247	(0.01156325-0.0257962j)	-30.9737	0.0282693	-65.8555	-1.1494	(0.01463462-0.01248042j)	-34.3188	0.0192336	-40.4576	-0.706118	(0.002659833-0.01624785j)	-35.6692	0.0164641	-80.7029	-1.40853	(0.01295923-0.03990539j)	-27.5439	0.0419569	-72.0089	-1.25679	(0.02686353-0.03954148j)	-26.4108	0.0478035	-55.8088
5.272	(0.02849771-0.02075815j)	-29.0552	0.0352565	-36.0701	-0.629543	(0.01863897-0.03595289j)	-27.8515	0.0404972	-62.5965	-1.09252	(0.01579675-0.02258048j)	-31.1952	0.0275575	-55.0243	-0.960355	(0.02257531-0.009391317j)	-32.2341	0.0244508	-22.5873	-0.394222	(0.02404161-0.02843875j)	-28.58	0.0372392	-49.7894	-0.868989	(0.00961385-0.02638585j)	-31.0312	0.0280827	-69.9805	-1.22139	(0.01176886-0.01418897j)	-34.6873	0.0184346	-50.3264	-0.878362	(0.0008031257999999999-0.01769158j)	-35.0357	0.0177098	-87.4008	-1.52543	(0.009643202-0.04116005j)	-27.4784	0.0422746	-76.8143	-1.34066	(0.02323115-0.0402907j)	-26.6494	0.0465084	-60.0327
5.2725	(0.02528059-0.02212437j)	-29.4746	0.0335946	-41.1909	-0.718916	(0.01584363-0.03724788j)	-27.8557	0.0404775	-66.9572	-1.16862	(0.01198244-0.02425949j)	-31.3543	0.0270574	-63.7139	-1.11202	(0.01958994-0.01114531j)	-32.9415	0.0225385	-29.6369	-0.517261	(0.02084658-0.02819751j)	-29.1021	0.0350668	-53.5243	-0.934175	(0.00461127-0.02796199j)	-30.9521	0.0283397	-80.6355	-1.40736	(0.009125813-0.01468747j)	-35.2433	0.0172917	-58.1459	-1.01484	(-0.003921779-0.01800258j)	-34.6919	0.0184248	-102.29	-1.78529	(0.006283863-0.04263113j)	-27.3121	0.0430918	-81.6149	-1.42445	(0.01945999-0.04145456j)	-26.7837	0.0457949	-64.8533
5.273	(0.023277-0.02482414j)	-29.3627	0.0340302	-46.8422	-0.817551	(0.01442736-0.03925904j)	-27.5711	0.0418261	-69.8221	-1.21862	(0.0104558-0.02657001j)	-30.8869	0.0285533	-68.5194	-1.19589	(0.01814129-0.01288937j)	-33.0518	0.022254	-35.3938	-0.617738	(0.01888078-0.0313871j)	-28.7237	0.0366283	-58.9712	-1.02924	(0.004334635-0.02876637j)	-30.7248	0.0290911	-81.4309	-1.42124	(0.005448332-0.01835818j)	-34.3568	0.0191496	-73.4702	-1.2823	(-0.005312236-0.01959379j)	-33.8496	0.0203011	-105.169	-1.83555	(0.00475484-0.04412131j)	-27.0569	0.0443768	-83.8491	-1.46344	(0.01725615-0.04361793j)	-26.5752	0.0469073	-68.4152
5.2735	(0.02181539-0.02574604j)	-29.4356	0.0337457	-49.7244	-0.867854	(0.01153032-0.04095355j)	-27.4229	0.0425458	-74.2756	-1.29635	(0.008887849-0.02837337j)	-30.5353	0.0297328	-72.607	-1.26723	(0.01679334-0.01534879j)	-32.86	0.0227509	-42.4267	-0.740486	(0.01747031-0.03261049j)	-28.6371	0.0369953	-61.8209	-1.07898	(0.002271353-0.03090296j)	-30.1766	0.0309863	-85.7963	-1.49743	(0.004749979-0.01754674j)	-34.8089	0.0181783	-74.8528	-1.30643	(-0.006830286-0.02155531j)	-32.9134	0.0226116	-107.582	-1.87766	(0.002285345-0.04628907j)	-26.6799	0.0463455	-87.1735	-1.52147	(0.01455424-0.04627133j)	-26.284	0.0485063	-72.5395
5.274	(0.01877343-0.02874088j)	-29.2868	0.034329	-56.8476	-0.992178	(0.008800836-0.04243462j)	-27.2627	0.0433376	-78.2831	-1.3663	(0.005650923-0.02934896j)	-30.4901	0.029888	-79.1015	-1.38058	(0.01381202-0.01737956j)	-33.0731	0.0221996	-51.5249	-0.899278	(0.01381108-0.0352031j)	-28.4466	0.0378154	-68.5786	-1.19692	(1.0014440000000006e-05-0.03276251j)	-29.6925	0.0327625	-89.9825	-1.57049	(0.001598907-0.02039563j)	-33.7826	0.0204582	-85.5175	-1.49256	(-0.00981619-0.02310558j)	-32.005	0.0251043	-113.018	-1.97253	(-0.0011254379999999999-0.04806134j)	-26.3617	0.0480745	-91.3414	-1.59421	(0.01243891-0.04836255j)	-26.0316	0.0499366	-75.5761
5.2745	(0.01587255-0.03190008j)	-28.9635	0.0356308	-63.5464	-1.10909	(0.005018244-0.04646312j)	-26.6075	0.0467333	-83.8357	-1.46321	(0.003836958-0.03198014j)	-29.8403	0.0322095	-83.1584	-1.45139	(0.01035858-0.02142792j)	-32.4683	0.0238003	-64.2002	-1.1205	(0.0110987-0.03704014j)	-28.2531	0.0386672	-73.3197	-1.27967	(-0.002865039-0.0345917j)	-29.1909	0.0347101	-94.7347	-1.65343	(9.169586999999992e-05-0.02348978j)	-32.5824	0.02349	-89.7763	-1.56689	(-0.01265107-0.02653724j)	-30.6335	0.0293985	-115.488	-2.01565	(-0.0038668830000000006-0.05192518j)	-25.6684	0.052069	-94.259	-1.64513	(0.009604298-0.05185677j)	-25.5574	0.0527387	-79.5072
5.275	(0.01480669-0.03323442j)	-28.7819	0.0363836	-65.9859	-1.15167	(0.004594344-0.0483144j)	-26.2794	0.0485324	-84.5679	-1.47599	(0.003522552-0.03407546j)	-29.305	0.034257	-84.098	-1.46779	(0.009620834-0.02192695j)	-32.4158	0.0239448	-66.3097	-1.15732	(0.009318258-0.04057432j)	-27.6118	0.0416306	-77.0658	-1.34505	(-0.00499348-0.03810436j)	-28.3066	0.0384302	-97.4659	-1.7011	(-0.001019779-0.02587655j)	-31.7351	0.0258966	-92.2568	-1.61019	(-0.01275606-0.02879141j)	-30.0364	0.0314907	-113.896	-1.98786	(-0.005725426-0.05359423j)	-25.3684	0.0538992	-96.0977	-1.67722	(0.009781985-0.05455059j)	-25.1266	0.0554207	-79.8338
5.2755	(0.01358894-0.0362082j)	-28.2516	0.0386742	-69.4289	-1.21176	(0.002831878-0.05107885j)	-25.8218	0.0511573	-86.8267	-1.51541	(0.00036585030000000013-0.03646847j)	-28.7612	0.0364703	-89.4252	-1.56076	(0.008671216-0.02507336j)	-31.5251	0.0265304	-70.9229	-1.23784	(0.009354364-0.04211912j)	-27.3013	0.0431454	-77.4782	-1.35225	(-0.005756237-0.03920005j)	-28.0416	0.0396204	-98.3538	-1.7166	(-0.0037000520000000005-0.02670649j)	-31.3851	0.0269616	-97.8878	-1.70847	(-0.01452271-0.02955592j)	-29.6479	0.0329312	-116.168	-2.02751	(-0.007563599-0.05453578j)	-25.1836	0.0550578	-97.896	-1.70861	(0.005880219000000001-0.0549883j)	-25.1452	0.0553018	-83.8962
5.276	(0.01153868-0.03957956j)	-27.6963	0.0412272	-73.7469	-1.28713	(0.002044794-0.05374303j)	-25.3873	0.0537819	-87.8211	-1.53277	(-0.0004892132-0.03925058j)	-28.1224	0.0392536	-90.7141	-1.58326	(0.007293096-0.02795715j)	-30.7842	0.0288928	-75.3793	-1.31562	(0.007448606-0.0455801j)	-26.71	0.0461847	-80.7189	-1.40881	(-0.007679143-0.04216132j)	-27.36	0.0428549	-100.323	-1.75096	(-0.005252105-0.02980678j)	-30.3809	0.030266	-99.9932	-1.74521	(-0.01504588-0.0323298j)	-28.9565	0.0356594	-114.957	-2.00637	(-0.009405994-0.05849103j)	-24.5473	0.0592425	-99.1356	-1.73024	(0.005661337-0.05828483j)	-24.6481	0.0585591	-84.4521
5.2765	(0.01153195-0.0412483j)	-27.365	0.04283	-74.3804	-1.29818	(-0.001133851-0.05563796j)	-25.0908	0.0556495	-91.1675	-1.59117	(-0.002882401-0.04178441j)	-27.5591	0.0418837	-93.9462	-1.63967	(0.005942903-0.0308298j)	-30.0621	0.0313974	-79.0892	-1.38037	(0.005810955-0.04758474j)	-26.3864	0.0479382	-83.0376	-1.44928	(-0.008595106-0.04461117j)	-26.8528	0.0454316	-100.905	-1.76113	(-0.006003949-0.03239717j)	-29.6432	0.0329488	-100.499	-1.75404	(-0.01705037-0.03473335j)	-28.2474	0.0386926	-116.146	-2.02713	(-0.01119144-0.06062931j)	-24.2008	0.0616536	-100.458	-1.75333	(0.00194596-0.06085779j)	-24.3092	0.0608889	-88.1686
5.277	(0.01109402-0.04356262j)	-26.9448	0.0449531	-75.7123	-1.32143	(-0.001036851-0.05851062j)	-24.6539	0.0585198	-91.0152	-1.58852	(-0.001737767-0.04532015j)	-26.8678	0.0453535	-92.1959	-1.60912	(0.006473713-0.03325468j)	-29.4014	0.0338789	-78.984	-1.37853	(0.005537482-0.04949976j)	-26.0539	0.0498085	-83.6169	-1.45939	(-0.009984682-0.04743322j)	-26.2901	0.0484727	-101.887	-1.77827	(-0.00610071-0.03432189j)	-29.1535	0.0348599	-100.079	-1.74671	(-0.01840671-0.0369578j)	-27.6836	0.0412878	-116.475	-2.03288	(-0.01241682-0.06210895j)	-23.9667	0.063338	-101.306	-1.76811	(0.001298363-0.06338471j)	-23.9585	0.063398	-88.8265
5.2775	(0.008316946-0.04705606j)	-26.4141	0.0477854	-79.9767	-1.39586	(-0.001472441-0.06149685j)	-24.2205	0.0615145	-91.3716	-1.59474	(-0.003492408-0.04771502j)	-26.4037	0.0478427	-94.1862	-1.64386	(0.005102042-0.03601708j)	-28.7835	0.0363767	-81.9373	-1.43008	(0.003533063-0.05332913j)	-25.4417	0.053446	-86.2097	-1.50464	(-0.01088882-0.05138921j)	-25.5918	0.0525302	-101.963	-1.7796	(-0.007209683-0.03763016j)	-28.3327	0.0383146	-100.846	-1.7601	(-0.01972211-0.04078908j)	-26.8767	0.0453069	-115.804	-2.02117	(-0.01204396-0.06540784j)	-23.5426	0.0665075	-100.433	-1.75289	(-0.0007818280999999999-0.06640691j)	-23.5551	0.0664115	-90.6745
5.278	(0.009018204-0.05025823j)	-25.8382	0.0510609	-79.8273	-1.39325	(-0.002727418-0.06351125j)	-23.935	0.0635698	-92.459	-1.61371	(-0.003698052-0.05005117j)	-25.9881	0.0501876	-94.2256	-1.64455	(0.005084371-0.03789831j)	-28.3501	0.0382378	-82.3589	-1.43743	(0.00369467-0.05651834j)	-24.9377	0.056639	-86.2598	-1.50552	(-0.01194325-0.05296931j)	-25.3042	0.0542991	-102.706	-1.79256	(-0.007612003-0.04135636j)	-27.5245	0.0420511	-100.429	-1.75282	(-0.01837173-0.04220678j)	-26.7388	0.0460319	-113.522	-1.98134	(-0.01123849-0.06843814j)	-23.1785	0.0693548	-99.3255	-1.73356	(0.0008666062-0.06857017j)	-23.2766	0.0685756	-89.2759
5.2785	(0.008338277-0.05286835j)	-25.4294	0.0535219	-81.0373	-1.41437	(-0.002626328-0.06686308j)	-23.4896	0.0669146	-92.2494	-1.61006	(-0.004393384-0.05232545j)	-25.5952	0.0525096	-94.7994	-1.65456	(0.004813425-0.04074777j)	-27.7377	0.0410311	-83.263	-1.45321	(0.002891889-0.05746662j)	-24.8007	0.0575393	-87.1191	-1.52052	(-0.01084571-0.05574922j)	-24.9139	0.0567944	-101.009	-1.76294	(-0.008312923-0.04190473j)	-27.3871	0.0427213	-101.22	-1.76663	(-0.01874799-0.04442177j)	-26.3362	0.048216	-112.882	-1.97016	(-0.01291531-0.07153872j)	-22.7699	0.0726952	-100.234	-1.74941	(-9.926433000000004e-05-0.07165607j)	-22.8949	0.0716561	-90.0794
5.279	(0.008839441-0.05712125j)	-24.7613	0.0578011	-81.2033	-1.41727	(-0.002785575-0.06854645j)	-23.2731	0.068603	-92.3271	-1.61141	(-0.003608965-0.05700727j)	-24.864	0.0571214	-93.6224	-1.63402	(0.004959595-0.04356381j)	-27.1616	0.0438452	-83.505	-1.45744	(0.003841097-0.06265034j)	-24.0452	0.062768	-86.4916	-1.50956	(-0.01028437-0.05844632j)	-24.5324	0.0593443	-99.9798	-1.74498	(-0.007898734-0.04495192j)	-26.813	0.0456406	-99.966	-1.74474	(-0.0182441-0.04707839j)	-25.9359	0.0504898	-111.183	-1.9405	(-0.01264954-0.07329757j)	-22.5708	0.0743811	-99.7915	-1.74169	(0.000368258-0.07476041j)	-22.5265	0.0747613	-89.7178
5.2795	(0.00976641-0.05948371j)	-24.3965	0.0602801	-80.676	-1.40806	(-0.002574556-0.07239974j)	-22.7998	0.0724455	-92.0366	-1.60634	(-0.004575801-0.05813341j)	-24.6847	0.0583132	-94.5006	-1.64935	(0.006084841-0.04691064j)	-26.5021	0.0473036	-82.6094	-1.44181	(0.003343855-0.06507713j)	-23.72	0.065163	-87.0586	-1.51946	(-0.01005584-0.06054259j)	-24.2406	0.061372	-99.4305	-1.73539	(-0.006388573-0.04790035j)	-26.3167	0.0483245	-97.5968	-1.70339	(-0.01776881-0.04972513j)	-25.5466	0.0528045	-109.664	-1.914	(-0.01261303-0.07580808j)	-22.2871	0.0768502	-99.4464	-1.73567	(-1.8948399999999996e-05-0.07668816j)	-22.3054	0.0766882	-90.0142
5.28	(0.009673265-0.06068229j)	-24.2298	0.0614485	-80.9428	-1.41272	(-0.002060133-0.07492989j)	-22.5036	0.0749582	-91.5749	-1.59828	(-0.002750973-0.06156304j)	-24.2049	0.0616245	-92.5586	-1.61545	(0.006508668-0.04934167j)	-26.0608	0.0497691	-82.4855	-1.43964	(0.004918396-0.06684614j)	-23.475	0.0670268	-85.7919	-1.49735	(-0.01026225-0.06297719j)	-23.9025	0.0638078	-99.2551	-1.73233	(-0.006840806-0.05039384j)	-25.8732	0.050856	-97.7305	-1.70572	(-0.01753932-0.0514911j)	-25.2886	0.0543963	-108.81	-1.8991	(-0.01175887-0.07892624j)	-21.9602	0.0797974	-98.4739	-1.71869	(0.0005230135-0.07923033j)	-22.022	0.0792321	-89.6218
5.2805	(0.009749723-0.06374928j)	-23.8101	0.0644905	-81.3046	-1.41903	(-0.003432709-0.07636373j)	-22.3335	0.0764408	-92.5738	-1.61572	(-0.003079095-0.06308459j)	-23.9912	0.0631597	-92.7943	-1.61957	(0.005878536-0.05181019j)	-25.6561	0.0521426	-83.5267	-1.45782	(0.00442598-0.06971774j)	-23.1157	0.0698581	-86.3675	-1.5074	(-0.01148115-0.06493124j)	-23.6172	0.0659385	-100.027	-1.74581	(-0.006370643-0.05314489j)	-25.4288	0.0535254	-96.8356	-1.6901	(-0.01711382-0.05326954j)	-25.0438	0.0559511	-107.811	-1.88165	(-0.01337741-0.08078488j)	-21.7359	0.081885	-99.4025	-1.7349	(0.0005458337-0.08109739j)	-21.8197	0.0810992	-89.6144
5.281	(0.009635583-0.06532499j)	-23.6049	0.0660318	-81.6092	-1.42435	(-0.0015394039999999999-0.07889874j)	-22.0569	0.0789138	-91.1178	-1.5903	(-0.002625809-0.06601886j)	-23.5998	0.0660711	-92.2777	-1.61055	(0.007409219-0.05451959j)	-25.1895	0.0550207	-82.2609	-1.43572	(0.005116894-0.07123832j)	-22.9234	0.0714219	-85.8916	-1.49909	(-0.009374774-0.06570297j)	-23.5608	0.0663684	-98.1204	-1.71252	(-0.00452576-0.05605024j)	-25.0002	0.0562327	-94.6163	-1.65137	(-0.01785033-0.05702293j)	-24.473	0.0597516	-107.382	-1.87417	(-0.01239067-0.0840542j)	-21.4154	0.0849626	-98.3857	-1.71716	(0.0004398084-0.08380549j)	-21.5344	0.0838066	-89.6993
5.2815	(0.01190889-0.06819046j)	-23.195	0.0692225	-80.0937	-1.3979	(-0.0007271463-0.08102013j)	-21.8278	0.0810234	-90.5142	-1.57977	(-0.001549306-0.0678644j)	-23.3649	0.0678821	-91.3078	-1.59362	(0.008653427-0.0564209j)	-24.8702	0.0570806	-81.2803	-1.41861	(0.006020079-0.07368781j)	-22.6232	0.0739333	-85.3295	-1.48928	(-0.007922201-0.06884837j)	-23.185	0.0693027	-96.564	-1.68536	(-0.003637021-0.05740787j)	-24.8032	0.057523	-93.6251	-1.63407	(-0.01521157-0.05790943j)	-24.4552	0.059874	-104.718	-1.82767	(-0.01211663-0.08455388j)	-21.369	0.0854176	-98.155	-1.71313	(0.001803278-0.08529072j)	-21.38	0.0853098	-88.7888
5.282	(0.01282198-0.06986853j)	-22.9705	0.0710353	-79.601	-1.3893	(0.00014242569999999997-0.08423964j)	-21.4897	0.0842398	-89.9031	-1.56911	(0.0005824522000000001-0.07058784j)	-23.0251	0.0705902	-89.5272	-1.56255	(0.0109619-0.05913655j)	-24.4162	0.060144	-79.4985	-1.38751	(0.007194235-0.07554746j)	-22.3964	0.0758892	-84.5602	-1.47585	(-0.007215167-0.07194451j)	-22.8166	0.0723054	-95.7269	-1.67075	(-0.001792507-0.06053087j)	-24.3567	0.0605574	-91.6962	-1.6004	(-0.01386231-0.06069048j)	-24.1167	0.0622535	-102.866	-1.79535	(-0.01050841-0.08705486j)	-21.1413	0.0876868	-96.8829	-1.69093	(0.003618842-0.08854426j)	-21.0495	0.0886182	-87.6596
5.2825	(0.01483439-0.0720274j)	-22.6696	0.0735391	-78.3624	-1.36768	(0.002047281-0.08479893j)	-21.4297	0.0848236	-88.617	-1.54666	(0.002260535-0.07184941j)	-22.8672	0.071885	-88.1979	-1.53934	(0.01295183-0.06053988j)	-24.1648	0.0619098	-77.9242	-1.36003	(0.009194555-0.07758056j)	-22.1444	0.0781235	-83.241	-1.45283	(-0.004846375-0.07424202j)	-22.5685	0.0744	-93.7349	-1.63598	(-0.0009934008-0.06145605j)	-24.2276	0.0614641	-90.9261	-1.58696	(-0.01152466-0.0613736j)	-24.0899	0.0624463	-100.635	-1.75641	(-0.007486907-0.08869167j)	-21.0115	0.0890071	-94.8252	-1.65501	(0.005007431-0.09136666j)	-20.7712	0.0915038	-86.863
5.283	(0.01566752-0.07519153j)	-22.292	0.0768065	-78.2298	-1.36537	(0.004509468-0.08687655j)	-21.2103	0.0869935	-87.0286	-1.51894	(0.003452214-0.07233901j)	-22.8027	0.0724213	-87.2678	-1.52311	(0.01522606-0.06252038j)	-23.8293	0.0643477	-76.3128	-1.33191	(0.0109425-0.07994555j)	-21.8635	0.0806909	-82.2061	-1.43477	(-0.003155342-0.07487156j)	-22.506	0.074938	-92.4132	-1.61291	(0.00254108-0.06260926j)	-24.0601	0.0626608	-87.6759	-1.53023	(-0.0106667-0.06373916j)	-23.7919	0.0646255	-99.5004	-1.73661	(-0.007276303-0.0910116j)	-20.7904	0.091302	-94.571	-1.65058	(0.006741331-0.0926532j)	-20.6399	0.0928981	-85.8386
5.2835	(0.0181352-0.07774699j)	-21.9562	0.0798341	-76.87	-1.34163	(0.005763749-0.0888039j)	-21.0131	0.0889907	-86.2865	-1.50598	(0.005353849-0.07484671j)	-22.4944	0.0750379	-85.9086	-1.49939	(0.01556297-0.06502043j)	-23.4971	0.066857	-76.5392	-1.33586	(0.01235795-0.08164547j)	-21.663	0.0825754	-81.393	-1.42058	(-0.001311048-0.07686002j)	-22.2847	0.0768712	-90.9772	-1.58785	(0.004129719-0.06562284j)	-23.6417	0.0657527	-86.3991	-1.50795	(-0.00848903-0.06558499j)	-23.5918	0.0661321	-97.3751	-1.69952	(-0.006073588-0.09193224j)	-20.7117	0.0921327	-93.7798	-1.63677	(0.007761065-0.09424525j)	-20.4855	0.0945643	-85.2923
5.284	(0.01931325-0.0781194j)	-21.8872	0.0804714	-76.1134	-1.32843	(0.00628989-0.08962182j)	-20.9304	0.0898423	-85.9854	-1.50073	(0.006816641-0.07675138j)	-22.2642	0.0770535	-84.9246	-1.48221	(0.01720497-0.066386j)	-23.2761	0.0685792	-75.4706	-1.31721	(0.01372185-0.08288942j)	-21.5126	0.0840175	-80.6003	-1.40674	(-0.00023442439999999992-0.07743093j)	-22.2217	0.0774313	-90.1735	-1.57382	(0.004247751-0.06692795j)	-23.4704	0.0670626	-86.3684	-1.50741	(-0.00694395-0.06610879j)	-23.5472	0.0664725	-95.9963	-1.67545	(-0.003362462-0.09253783j)	-20.6679	0.0925989	-92.081	-1.60712	(0.008296361-0.09553124j)	-20.3645	0.0958908	-85.0366
5.2845	(0.02304037-0.07815386j)	-21.779	0.0814794	-73.5741	-1.28411	(0.00827025-0.09070005j)	-20.8119	0.0910763	-84.79	-1.47987	(0.008583957-0.07783202j)	-22.1243	0.0783039	-83.7064	-1.46095	(0.02063425-0.06679953j)	-23.1087	0.0699139	-72.8342	-1.2712	(0.01556361-0.08405937j)	-21.3619	0.085488	-79.5105	-1.38772	(0.002241581-0.0790156j)	-22.0422	0.0790474	-88.375	-1.54244	(0.007145673-0.06648912j)	-23.4951	0.066872	-83.8659	-1.46374	(-0.005250118-0.06728295j)	-23.4155	0.0674875	-94.4618	-1.64867	(-0.002403532-0.09423475j)	-20.513	0.0942654	-91.4611	-1.5963	(0.01050504-0.09550753j)	-20.347	0.0960835	-83.7232
5.285	(0.0247091-0.07935661j)	-21.6065	0.0831144	-72.7051	-1.26894	(0.01093017-0.09156999j)	-20.7035	0.09222	-83.1931	-1.45199	(0.01132921-0.07803516j)	-22.0636	0.0788533	-81.7395	-1.42662	(0.02202424-0.06750581j)	-22.9739	0.0710078	-71.9307	-1.25543	(0.01781204-0.08523493j)	-21.202	0.0870762	-78.1964	-1.36479	(0.004268481-0.07879487j)	-22.0573	0.0789104	-86.8992	-1.51668	(0.00962971-0.06827877j)	-23.2287	0.0689545	-81.9722	-1.43069	(-0.002255221-0.06781435j)	-23.3688	0.0678518	-91.9047	-1.60404	(0.0001021908000000001-0.09457847j)	-20.4841	0.0945785	-89.9381	-1.56972	(0.01274934-0.0973118j)	-20.1628	0.0981434	-82.5359
5.2855	(0.02461568-0.08120763j)	-21.4263	0.0848564	-73.1369	-1.27648	(0.01289867-0.09250525j)	-20.593	0.0934002	-82.062	-1.43225	(0.01396404-0.07910254j)	-21.9029	0.0803256	-79.9887	-1.39607	(0.02426574-0.06819871j)	-22.8068	0.0723871	-70.414	-1.22896	(0.01999388-0.08587232j)	-21.0937	0.0881692	-76.8932	-1.34204	(0.005397458-0.08019091j)	-21.8979	0.0803723	-86.1494	-1.50359	(0.01085281-0.0683464j)	-23.1975	0.0692027	-80.9773	-1.41332	(-0.0001005909000000001-0.06797308j)	-23.3533	0.0679732	-90.0848	-1.57228	(0.0006363792-0.09509806j)	-20.4364	0.0951002	-89.6166	-1.5641	(0.01423904-0.09723907j)	-20.151	0.0982761	-81.6692
5.286	(0.02836144-0.08235948j)	-21.199	0.087106	-70.9983	-1.23915	(0.01502458-0.09304141j)	-20.5147	0.0942467	-80.8269	-1.4107	(0.01674313-0.07957994j)	-21.7958	0.0813222	-78.1186	-1.36343	(0.02769245-0.06958473j)	-22.5112	0.0748926	-68.2991	-1.19204	(0.02295146-0.08614355j)	-20.9977	0.0891486	-75.0811	-1.31041	(0.008545117-0.08112931j)	-21.7685	0.0815781	-83.9874	-1.46586	(0.01436984-0.06993517j)	-22.9265	0.0713962	-78.3888	-1.36814	(0.003839665-0.06778252j)	-23.3637	0.0678912	-86.7578	-1.51421	(0.003963915-0.09500629j)	-20.4374	0.0950889	-87.6109	-1.5291	(0.01664169-0.09874076j)	-19.9884	0.100133	-80.4333
5.2865	(0.0301008-0.08209986j)	-21.1654	0.087444	-69.8652	-1.21938	(0.01604406-0.09266625j)	-20.5333	0.0940449	-80.1773	-1.39936	(0.01824197-0.08040024j)	-21.6768	0.0824437	-77.2166	-1.34768	(0.02965525-0.06957531j)	-22.4259	0.0756317	-66.9147	-1.16788	(0.02413208-0.08586702j)	-20.9933	0.0891936	-74.3025	-1.29682	(0.01072448-0.08070989j)	-21.7855	0.0814193	-82.4311	-1.43869	(0.01604004-0.06936864j)	-22.9505	0.071199	-76.9804	-1.34356	(0.003793882-0.06822464j)	-23.3078	0.06833	-86.8171	-1.51524	(0.004744667-0.09541927j)	-20.3966	0.0955372	-87.1533	-1.52111	(0.01808197-0.09898506j)	-19.946	0.100623	-79.6477
5.287	(0.03236163-0.08111288j)	-21.1767	0.0873303	-68.2495	-1.19118	(0.01869389-0.09171318j)	-20.5746	0.093599	-78.4792	-1.36972	(0.01952844-0.07810991j)	-21.8826	0.0805141	-75.9631	-1.32581	(0.03279554-0.06754354j)	-22.489	0.0750845	-64.1013	-1.11878	(0.02668029-0.08656675j)	-20.8589	0.090585	-72.8704	-1.27183	(0.01382307-0.07972047j)	-21.84	0.08091	-80.163	-1.39911	(0.01847999-0.06799608j)	-23.0408	0.0704626	-74.7954	-1.30543	(0.006941991-0.06683231j)	-23.4537	0.0671919	-84.0699	-1.4673	(0.008035383-0.09362568j)	-20.5402	0.0939699	-85.0946	-1.48518	(0.0211047-0.09756111j)	-20.0158	0.0998177	-77.7937
5.2875	(0.03556093-0.08079097j)	-21.0836	0.0882709	-66.2428	-1.15616	(0.02087196-0.09177662j)	-20.5264	0.0941201	-77.1876	-1.34718	(0.02268641-0.0785739j)	-21.7467	0.0817834	-73.8951	-1.28971	(0.03407128-0.06901059j)	-22.2744	0.0769631	-63.7239	-1.11219	(0.02859159-0.08538082j)	-20.9112	0.0900409	-71.4858	-1.24766	(0.01497383-0.07862089j)	-21.9345	0.0800341	-79.2168	-1.38259	(0.02120144-0.06861904j)	-22.8751	0.0718197	-72.8303	-1.27113	(0.009292176-0.06637653j)	-23.4754	0.0670238	-82.0308	-1.43171	(0.01055833-0.09413024j)	-20.4711	0.0947205	-83.6	-1.4591	(0.02169883-0.09743967j)	-20.0151	0.0998265	-77.4457
5.288	(0.03663235-0.08127905j)	-20.9973	0.0891528	-65.739	-1.14736	(0.02184229-0.09158193j)	-20.5235	0.0941506	-76.5856	-1.33667	(0.02415611-0.0784031j)	-21.7195	0.08204	-72.8759	-1.27192	(0.03630544-0.0702351j)	-22.0405	0.0790636	-62.665	-1.09371	(0.02972926-0.08593664j)	-20.8255	0.0909337	-70.9172	-1.23774	(0.01582935-0.08000281j)	-21.7711	0.0815538	-78.808	-1.37546	(0.02212519-0.06771982j)	-22.9452	0.0712425	-71.9069	-1.25501	(0.01040383-0.06728195j)	-23.3394	0.0680816	-81.21	-1.41738	(0.01118207-0.0944047j)	-20.4396	0.0950646	-83.2449	-1.4529	(0.02443141-0.0976681j)	-19.9414	0.100677	-75.9558
5.2885	(0.03899019-0.08210289j)	-20.8296	0.0908907	-64.5972	-1.12743	(0.02446641-0.09139489j)	-20.481	0.0946131	-75.0133	-1.30923	(0.02633454-0.07851587j)	-21.6379	0.0828146	-71.4583	-1.24718	(0.03705408-0.06878463j)	-22.1436	0.0781302	-61.6888	-1.07667	(0.03337546-0.08576783j)	-20.7211	0.0920328	-68.7371	-1.19969	(0.01901332-0.07981979j)	-21.7181	0.0820531	-76.6017	-1.33695	(0.02498351-0.06786085j)	-22.8156	0.0723137	-69.7884	-1.21804	(0.01318776-0.06677499j)	-23.3415	0.0680648	-78.8281	-1.37581	(0.01322379-0.09342717j)	-20.5044	0.0943584	-81.9438	-1.43019	(0.02542927-0.09710886j)	-19.9668	0.100383	-75.3258
5.289	(0.03989678-0.08109442j)	-20.8788	0.0903773	-63.8038	-1.11359	(0.02658539-0.09008367j)	-20.5444	0.0939247	-73.5577	-1.28382	(0.02896746-0.07708969j)	-21.6865	0.0823525	-69.4056	-1.21136	(0.04023879-0.06776852j)	-22.0679	0.0788145	-59.2995	-1.03497	(0.03471761-0.08495973j)	-20.7451	0.0917795	-67.7733	-1.18287	(0.02127334-0.07743444j)	-21.9053	0.0803035	-74.6383	-1.30268	(0.02706807-0.06754071j)	-22.7618	0.0727628	-68.1607	-1.18963	(0.01700402-0.0656746j)	-23.3703	0.0678402	-75.4841	-1.31745	(0.01603619-0.09247121j)	-20.5512	0.0938514	-80.1617	-1.39909	(0.02704576-0.09620024j)	-20.0061	0.0999298	-74.2972
5.2895	(0.04265601-0.07858794j)	-20.9715	0.0894181	-61.5077	-1.07351	(0.02756832-0.08834586j)	-20.6727	0.0925473	-72.6695	-1.26832	(0.02988478-0.07466961j)	-21.8919	0.0804279	-68.1874	-1.19009	(0.04247001-0.06564285j)	-22.1377	0.0781837	-57.0977	-0.996543	(0.03610747-0.08215023j)	-20.9407	0.0897352	-66.2731	-1.15668	(0.02263514-0.07511336j)	-22.1082	0.0784498	-73.23	-1.2781	(0.02934036-0.0644945j)	-22.9926	0.0708548	-65.5379	-1.14385	(0.01759907-0.06355579j)	-23.616	0.0659474	-74.5222	-1.30066	(0.01637819-0.09047084j)	-20.7298	0.0919414	-79.7387	-1.3917	(0.02971497-0.09278494j)	-20.2264	0.097427	-72.242
5.29	(0.04360785-0.07726812j)	-21.0391	0.0887243	-60.5609	-1.05699	(0.03020723-0.08663292j)	-20.748	0.0917482	-70.7773	-1.2353	(0.03122366-0.07393839j)	-21.9099	0.0802608	-67.106	-1.17122	(0.04426089-0.0649636j)	-22.0906	0.0786085	-55.7327	-0.972719	(0.03672667-0.08100559j)	-21.0178	0.0889424	-65.6112	-1.14513	(0.0220752-0.07427308j)	-22.2157	0.0774842	-73.4472	-1.28189	(0.02975192-0.06381138j)	-23.0478	0.0704065	-65.0028	-1.13451	(0.0192359-0.06188434j)	-23.7678	0.064805	-72.7329	-1.26943	(0.01875241-0.0890215j)	-20.8215	0.0909752	-78.1045	-1.36318	(0.02997936-0.0939666j)	-20.1195	0.0986331	-72.3051
5.2905	(0.04608898-0.07605577j)	-21.019	0.0889307	-58.7846	-1.02598	(0.03092423-0.08577467j)	-20.8021	0.091179	-70.1743	-1.22477	(0.0329205-0.07189772j)	-22.0391	0.0790762	-65.3979	-1.14141	(0.04579128-0.06360935j)	-22.1162	0.0783772	-54.2505	-0.94685	(0.03893582-0.08016805j)	-21.0002	0.089123	-64.0952	-1.11867	(0.02641993-0.07251336j)	-22.2503	0.0771764	-69.981	-1.2214	(0.03267543-0.06156334j)	-23.1357	0.0696974	-62.0424	-1.08284	(0.02044848-0.05946489j)	-24.0294	0.0628825	-71.0232	-1.23959	(0.02076635-0.08662772j)	-21.0042	0.089082	-76.5195	-1.33552	(0.03273496-0.09085793j)	-20.3027	0.0965751	-70.1866
5.291	(0.04741812-0.07408779j)	-21.114	0.0879629	-57.3797	-1.00146	(0.03198997-0.08324496j)	-20.9946	0.0891801	-68.9789	-1.20391	(0.03506485-0.07069033j)	-22.0574	0.0789092	-63.617	-1.11033	(0.04786418-0.0619672j)	-22.1247	0.0783002	-52.3171	-0.913105	(0.04140218-0.07881829j)	-21.0092	0.0890307	-62.2877	-1.08712	(0.02772676-0.07042126j)	-22.42	0.0756831	-68.5091	-1.19571	(0.03445869-0.06069495j)	-23.1236	0.0697945	-60.4149	-1.05444	(0.02310604-0.05891351j)	-23.9743	0.0632826	-68.5848	-1.19703	(0.02163154-0.08548144j)	-21.093	0.088176	-75.7991	-1.32294	(0.03303392-0.08889274j)	-20.4609	0.0948323	-69.6142
5.2915	(0.04758788-0.07222462j)	-21.2604	0.0864928	-56.6196	-0.988199	(0.03304891-0.08097531j)	-21.1638	0.0874599	-67.7979	-1.1833	(0.03503618-0.06807986j)	-22.3192	0.0765663	-62.7681	-1.09551	(0.04687113-0.05882155j)	-22.4742	0.0752122	-51.4509	-0.897988	(0.04118337-0.07515997j)	-21.34	0.0857035	-61.2798	-1.06953	(0.02777684-0.06764223j)	-22.7189	0.0731233	-67.6748	-1.18115	(0.0347933-0.05731184j)	-23.4725	0.0670464	-58.7386	-1.02518	(0.02377208-0.05604959j)	-24.3102	0.0608824	-67.0169	-1.16967	(0.02153738-0.08230828j)	-21.4035	0.0850794	-75.3363	-1.31487	(0.03328329-0.08727177j)	-20.5928	0.0934031	-69.1244
5.292	(0.04921871-0.07032901j)	-21.3261	0.0858408	-55.0143	-0.960181	(0.0340668-0.07922655j)	-21.2858	0.0862403	-66.7327	-1.1647	(0.0384381-0.06599954j)	-22.3408	0.0763769	-59.7835	-1.04342	(0.04997962-0.05702428j)	-22.4035	0.075827	-48.7667	-0.851139	(0.04193776-0.0743503j)	-21.3747	0.0853624	-60.5746	-1.05723	(0.02977196-0.06664745j)	-22.7342	0.0729949	-65.9293	-1.15068	(0.03588817-0.05687566j)	-23.4459	0.0672518	-57.7483	-1.0079	(0.02531997-0.05387605j)	-24.5054	0.0595292	-64.828	-1.13146	(0.0220348-0.08087511j)	-21.5327	0.0838231	-74.7594	-1.3048	(0.03538817-0.0855094j)	-20.6731	0.0925429	-67.5177
5.2925	(0.05037375-0.06744599j)	-21.4957	0.0841812	-53.2449	-0.929298	(0.03563089-0.0767377j)	-21.4519	0.0846064	-65.0936	-1.1361	(0.03881314-0.06435319j)	-22.4812	0.0751518	-58.9047	-1.02808	(0.05131574-0.05532909j)	-22.4454	0.0754627	-47.1552	-0.823013	(0.04359792-0.07180241j)	-21.5142	0.0840022	-58.7342	-1.0251	(0.03174324-0.0639105j)	-22.931	0.0713595	-63.5872	-1.10981	(0.03824736-0.05451173j)	-23.5317	0.0665912	-54.9451	-0.958974	(0.02669753-0.05137989j)	-24.7461	0.0579021	-62.5431	-1.09158	(0.0242905-0.07807095j)	-21.7489	0.0817625	-72.7173	-1.26916	(0.03605301-0.08317886j)	-20.8521	0.0906562	-66.5662
5.293	(0.0509387-0.06734344j)	-21.4692	0.0844387	-52.8961	-0.923211	(0.03529174-0.07554286j)	-21.5788	0.08338	-64.9592	-1.13375	(0.03801282-0.06219744j)	-22.7462	0.0728937	-58.5682	-1.02221	(0.05084118-0.05445077j)	-22.5573	0.0744964	-46.9634	-0.819666	(0.0441029-0.07030085j)	-21.6195	0.0829896	-57.8981	-1.01051	(0.03015363-0.06229873j)	-23.1963	0.0692125	-64.1722	-1.12002	(0.03824921-0.05181717j)	-23.8216	0.0644051	-53.5668	-0.934918	(0.02780776-0.04964428j)	-24.8975	0.0569019	-60.7451	-1.0602	(0.02515278-0.07624365j)	-21.9073	0.0802855	-71.7423	-1.25214	(0.03685088-0.08222615j)	-20.9049	0.0901062	-65.8597
5.2935	(0.05141801-0.06332638j)	-21.7691	0.0815723	-50.925	-0.88881	(0.03635528-0.07286185j)	-21.7845	0.0814282	-63.4826	-1.10798	(0.03877448-0.05961799j)	-22.9604	0.071118	-56.9607	-0.994152	(0.05157373-0.05132759j)	-22.7619	0.0727624	-44.8629	-0.783006	(0.04383143-0.06733202j)	-21.9012	0.0803417	-56.9369	-0.993736	(0.03207678-0.06047363j)	-23.292	0.0684542	-62.0574	-1.08311	(0.03900742-0.05010381j)	-23.9448	0.0634978	-52.0981	-0.909283	(0.02760809-0.04665618j)	-25.318	0.0542126	-59.3857	-1.03648	(0.02429053-0.07366073j)	-22.207	0.0775624	-71.7494	-1.25226	(0.03637954-0.07939325j)	-21.1766	0.0873313	-65.3818
5.294	(0.0509891-0.06130431j)	-21.9667	0.0797377	-50.2484	-0.877001	(0.03525326-0.06936975j)	-22.1789	0.0778136	-63.0606	-1.10062	(0.03934992-0.05775483j)	-23.1122	0.0698859	-55.7323	-0.972713	(0.05175934-0.04916498j)	-22.9275	0.0713878	-43.5275	-0.759698	(0.04345216-0.06556504j)	-22.0853	0.0786566	-56.4662	-0.985522	(0.03156126-0.05643862j)	-23.7868	0.064664	-60.7855	-1.06091	(0.03958778-0.04715617j)	-24.2126	0.0615703	-49.9864	-0.872428	(0.02759928-0.04440667j)	-25.6325	0.0522845	-58.1386	-1.01471	(0.02478526-0.07226456j)	-22.3385	0.0763968	-71.0691	-1.24039	(0.03648782-0.07587278j)	-21.4947	0.0841905	-64.3167
5.2945	(0.05080109-0.05922433j)	-22.1551	0.0780274	-49.3779	-0.861806	(0.03497259-0.06841155j)	-22.2891	0.0768324	-62.9235	-1.09822	(0.03891755-0.05440098j)	-23.493	0.0668883	-54.4207	-0.94982	(0.0521846-0.04708349j)	-23.0627	0.0702858	-42.0583	-0.734056	(0.04481346-0.06279947j)	-22.2534	0.0771493	-54.4885	-0.951004	(0.03154428-0.05408457j)	-24.0669	0.0626114	-59.7476	-1.04279	(0.03890892-0.04569941j)	-24.4342	0.0600195	-49.5886	-0.865484	(0.02823987-0.04229357j)	-25.8733	0.0508551	-56.2685	-0.982071	(0.02394025-0.06916395j)	-22.711	0.0731901	-70.9073	-1.23757	(0.03530223-0.07422417j)	-21.7034	0.0821917	-64.5635
5.295	(0.05173682-0.05550241j)	-22.3979	0.0758763	-47.0111	-0.820498	(0.03559891-0.06341171j)	-22.7668	0.0727209	-60.6904	-1.05925	(0.03870086-0.05127492j)	-23.8438	0.0642408	-52.9555	-0.924248	(0.05295799-0.04387525j)	-23.2518	0.068772	-39.6415	-0.691874	(0.04445184-0.05935368j)	-22.5973	0.0741541	-53.1693	-0.927979	(0.0324017-0.04964354j)	-24.5415	0.059282	-56.868	-0.992534	(0.04088033-0.04036855j)	-24.8138	0.0574528	-44.6391	-0.779099	(0.0289197-0.03790124j)	-26.4343	0.0476744	-52.6554	-0.919009	(0.02442716-0.06525684j)	-23.138	0.0696788	-69.478	-1.21262	(0.03566116-0.06990497j)	-22.1053	0.0784756	-62.9722
5.2955	(0.05099047-0.05414521j)	-22.5714	0.0743756	-46.7187	-0.815396	(0.03422381-0.06162805j)	-23.0371	0.0704932	-60.9553	-1.06387	(0.03933741-0.04972858j)	-23.9573	0.0634063	-51.6545	-0.901541	(0.05174245-0.0423092j)	-23.4995	0.0668382	-39.2725	-0.685434	(0.04324736-0.05728362j)	-22.8805	0.0717757	-52.9483	-0.924123	(0.03084312-0.04869097j)	-24.7859	0.0576377	-57.6479	-1.00615	(0.03882865-0.03996168j)	-25.0799	0.0557189	-45.8239	-0.799777	(0.02837063-0.03591233j)	-26.789	0.0457667	-51.6914	-0.902185	(0.02356491-0.06232696j)	-23.5262	0.066633	-69.2891	-1.20932	(0.03522031-0.06944335j)	-22.1732	0.0778643	-63.1068
5.296	(0.04944111-0.05168027j)	-22.9113	0.0715211	-46.2685	-0.807538	(0.03275912-0.05912207j)	-23.4022	0.0675913	-61.0095	-1.06482	(0.03802432-0.04691078j)	-24.3813	0.060386	-50.9729	-0.889645	(0.05056946-0.03952498j)	-23.8516	0.0641833	-38.0111	-0.663419	(0.04277491-0.05485973j)	-23.1522	0.069565	-52.056	-0.908548	(0.02986796-0.04618764j)	-25.1922	0.0550036	-57.1106	-0.996769	(0.03805827-0.03635176j)	-25.5754	0.0526297	-43.6862	-0.762468	(0.02716138-0.03309399j)	-27.3685	0.042813	-50.6231	-0.88354	(0.0219526-0.05962138j)	-23.9398	0.0635344	-69.7863	-1.218	(0.03382739-0.06506026j)	-22.6945	0.0733289	-62.5283
5.2965	(0.0488838-0.04879779j)	-23.214	0.0690713	-44.9496	-0.784518	(0.03237177-0.05676955j)	-23.695	0.0653507	-60.3069	-1.05255	(0.03613656-0.04318592j)	-24.9882	0.0563105	-50.0785	-0.874035	(0.05005658-0.0371092j)	-24.1086	0.0623117	-36.5512	-0.637939	(0.04176205-0.05227662j)	-23.4902	0.0669097	-51.3798	-0.896747	(0.02817343-0.04368345j)	-25.6832	0.0519806	-57.1802	-0.997983	(0.0378653-0.03329015j)	-25.9482	0.0504184	-41.3211	-0.721189	(0.02714253-0.03049347j)	-27.7818	0.0408236	-48.3274	-0.843472	(0.021571-0.05720173j)	-24.2744	0.0611338	-69.3383	-1.21018	(0.0334381-0.06334308j)	-22.8984	0.0716272	-62.1709
5.297	(0.0476309-0.04666347j)	-23.5201	0.0666797	-44.4122	-0.775139	(0.0310825-0.05367491j)	-24.1486	0.0620251	-59.9254	-1.0459	(0.03617201-0.04231142j)	-25.0882	0.0556657	-49.4729	-0.863465	(0.0498301-0.03568825j)	-24.2519	0.0612918	-35.6102	-0.621515	(0.04071487-0.04916419j)	-23.8989	0.0638343	-50.3705	-0.87913	(0.02848722-0.04030471j)	-26.1332	0.0493558	-54.7475	-0.955524	(0.03681139-0.03071989j)	-26.385	0.0479457	-39.8457	-0.695439	(0.02581638-0.02826092j)	-28.3411	0.0382775	-47.5883	-0.830572	(0.02062753-0.05458914j)	-24.6782	0.0583564	-69.3	-1.20951	(0.03103821-0.06103115j)	-23.29	0.0684702	-63.0438
5.2975	(0.04662383-0.04479285j)	-23.788	0.0646543	-43.8526	-0.765372	(0.02964261-0.05212418j)	-24.4423	0.0599634	-60.3735	-1.05372	(0.03387373-0.03957852j)	-25.6641	0.052095	-49.4411	-0.862909	(0.04739718-0.03279871j)	-24.7857	0.0576389	-34.6831	-0.605335	(0.037577-0.04864094j)	-24.2274	0.0614652	-52.3125	-0.913026	(0.02605941-0.03885573j)	-26.5978	0.0467853	-56.1514	-0.980027	(0.03408611-0.0291614j)	-26.9632	0.0448581	-40.5477	-0.707691	(0.02366485-0.02496564j)	-29.269	0.0343992	-46.5322	-0.81214	(0.0187718-0.052562j)	-25.0652	0.0558135	-70.3465	-1.22778	(0.02828396-0.05860529j)	-23.7319	0.0650735	-64.2372
5.298	(0.0437642-0.04210708j)	-24.3317	0.0607315	-43.8945	-0.766103	(0.02748664-0.05006779j)	-24.8648	0.0571165	-61.2337	-1.06873	(0.03253198-0.03766952j)	-26.0602	0.0497727	-49.1856	-0.858451	(0.0465571-0.03085601j)	-25.0589	0.0558539	-33.5347	-0.585291	(0.03861365-0.0459681j)	-24.4321	0.060034	-49.9694	-0.872131	(0.02496303-0.03599463j)	-27.1698	0.0438037	-55.2579	-0.964432	(0.03277133-0.02750495j)	-27.3743	0.0427841	-40.0067	-0.698249	(0.02255765-0.02319362j)	-29.8014	0.0323542	-45.7964	-0.799298	(0.01654306-0.04963171j)	-25.6273	0.0523161	-71.5659	-1.24906	(0.02742824-0.05687793j)	-23.9931	0.0631459	-64.2552
5.2985	(0.04135581-0.04050516j)	-24.7483	0.0578876	-44.4046	-0.775007	(0.02477841-0.04632849j)	-25.5904	0.0525385	-61.8603	-1.07967	(0.03014159-0.03462163j)	-26.763	0.045904	-48.9572	-0.854464	(0.04360343-0.02938353j)	-25.5836	0.0525799	-33.9753	-0.592981	(0.03454231-0.04345048j)	-25.1129	0.0555078	-51.516	-0.899123	(0.02292526-0.03414825j)	-27.7168	0.0411299	-56.1248	-0.979562	(0.03095262-0.02398934j)	-28.143	0.0391606	-37.7769	-0.659331	(0.02082342-0.0205318j)	-30.6795	0.0292433	-44.596	-0.778347	(0.01348125-0.04685418j)	-26.2396	0.0487551	-73.948	-1.29064	(0.02534583-0.05221623j)	-24.7251	0.0580426	-64.108
5.299	(0.03923041-0.03804063j)	-25.2489	0.0546454	-44.1179	-0.770002	(0.02264788-0.04330596j)	-26.2191	0.0488706	-62.3916	-1.08894	(0.02797269-0.03333915j)	-27.2263	0.0435198	-50.0022	-0.872703	(0.04196763-0.02616801j)	-26.1154	0.0494575	-31.9447	-0.55754	(0.03135601-0.04136994j)	-25.6949	0.0519102	-52.84	-0.922232	(0.02145062-0.0309728j)	-28.4788	0.0376755	-55.295	-0.965079	(0.02913304-0.0224414j)	-28.6891	0.0367743	-37.6073	-0.656372	(0.01832983-0.01820984j)	-31.755	0.0258376	-44.8119	-0.782114	(0.01321083-0.04367917j)	-26.8144	0.0456333	-73.172	-1.27709	(0.02260318-0.05213863j)	-24.9089	0.0568273	-66.5623
5.2995	(0.03647238-0.03647782j)	-25.7498	0.0515836	-45.0043	-0.785473	(0.02054149-0.04425491j)	-26.2334	0.0487899	-65.101	-1.13623	(0.02507343-0.031466j)	-27.9081	0.0402341	-51.4507	-0.897984	(0.03903466-0.02562835j)	-26.6144	0.046696	-33.287	-0.580969	(0.02904588-0.04044088j)	-26.057	0.0497908	-54.3129	-0.94794	(0.01808698-0.030063j)	-29.0977	0.0350845	-58.9674	-1.02917	(0.02666469-0.02133604j)	-29.3321	0.0341501	-38.6654	-0.674839	(0.01612233-0.01670668j)	-32.6838	0.0232173	-46.0197	-0.803196	(0.009665-0.04269469j)	-27.1755	0.043775	-77.2447	-1.34817	(0.02054725-0.04953773j)	-25.4118	0.05363	-67.4723
5.3	(0.0341913-0.03517211j)	-26.1868	0.0490522	-45.8101	-0.799537	(0.01812383-0.04293048j)	-26.6324	0.0465993	-67.1121	-1.17133	(0.0227011-0.02998803j)	-28.4936	0.0376115	-52.8741	-0.922827	(0.03624189-0.02432994j)	-27.2001	0.0436511	-33.8743	-0.591218	(0.02553388-0.03995027j)	-26.482	0.0474131	-57.4157	-1.00209	(0.01560505-0.02878663j)	-29.6973	0.0327443	-61.5382	-1.07404	(0.02422317-0.02014212j)	-30.0328	0.0315034	-39.7443	-0.693669	(0.01391498-0.01592096j)	-33.4959	0.0211448	-48.8464	-0.852531	(0.006306737-0.04116166j)	-27.6094	0.041642	-81.289	-1.41876	(0.0167067-0.04909136j)	-25.704	0.0518563	-71.2056
5.3005	(0.03074007-0.03369999j)	-26.818	0.045614	-47.6299	-0.831299	(0.01408618-0.04029295j)	-27.3947	0.0426842	-70.7307	-1.23448	(0.0198714-0.02777919j)	-29.3309	0.0341549	-54.4226	-0.949853	(0.03376717-0.02229475j)	-27.8588	0.0404633	-33.4348	-0.583547	(0.02306861-0.03767041j)	-27.0969	0.0441726	-58.5175	-1.02132	(0.01180079-0.02649286j)	-30.7514	0.0290022	-65.9902	-1.15175	(0.02200946-0.01767865j)	-30.9857	0.0282303	-38.7725	-0.676707	(0.01106333-0.01342621j)	-35.1904	0.0173971	-50.5111	-0.881586	(0.00229661-0.03957254j)	-28.0375	0.0396391	-86.6785	-1.51283	(0.0142779-0.04595241j)	-26.3536	0.0481195	-72.7394
5.301	(0.02930126-0.03232095j)	-27.2051	0.0436258	-47.8054	-0.834362	(0.01152905-0.03861991j)	-27.893	0.040304	-73.3783	-1.28069	(0.01821189-0.02735466j)	-29.666	0.0328626	-56.3455	-0.983415	(0.03291382-0.02202636j)	-28.0452	0.039604	-33.791	-0.589763	(0.02239739-0.03617167j)	-27.4231	0.0425445	-58.2343	-1.01638	(0.01110725-0.02588618j)	-31.0047	0.0281685	-66.7768	-1.16547	(0.01879084-0.01722761j)	-31.8716	0.0254929	-42.5149	-0.742025	(0.009634179-0.01187048j)	-36.3129	0.0152881	-50.9369	-0.889017	(0.0004520545000000001-0.03819241j)	-28.3599	0.0381951	-89.3219	-1.55896	(0.01298942-0.04459121j)	-26.6613	0.0464446	-73.7592
5.3015	(0.02604183-0.03286087j)	-27.5498	0.0419287	-51.6036	-0.900653	(0.009575159-0.03702264j)	-28.3495	0.0382408	-75.4993	-1.31771	(0.01537576-0.02563218j)	-30.4894	0.0298902	-59.0421	-1.03048	(0.03027569-0.02091496j)	-28.6836	0.0367975	-34.6374	-0.604536	(0.01818446-0.03585503j)	-27.9149	0.0402027	-63.1074	-1.10143	(0.00811763-0.02516645j)	-31.5537	0.0264433	-72.1225	-1.25878	(0.01698956-0.01601714j)	-32.6345	0.0233494	-43.3125	-0.755945	(0.006984355-0.01130923j)	-37.5281	0.0132921	-58.3013	-1.01755	(-0.001359028-0.03758735j)	-28.4935	0.0376119	-92.0707	-1.60694	(0.009195141-0.04445576j)	-26.8595	0.0453968	-78.3138
5.302	(0.02399473-0.03097569j)	-28.1382	0.0391821	-52.2375	-0.911717	(0.007457208-0.03609354j)	-28.6699	0.0368558	-78.3265	-1.36706	(0.01217777-0.02530259j)	-31.0319	0.0280806	-64.2992	-1.12223	(0.02652279-0.02039398j)	-29.5103	0.033457	-37.5575	-0.655502	(0.0151751-0.03461968j)	-28.4503	0.0377995	-66.3304	-1.15768	(0.005067187-0.02293868j)	-32.5817	0.0234917	-77.5433	-1.35339	(0.01471519-0.01462509j)	-33.661	0.0207468	-44.8241	-0.782327	(0.00333038-0.01072591j)	-38.9916	0.0112311	-72.7505	-1.26974	(-0.004129901-0.03594369j)	-28.8306	0.0361802	-96.5545	-1.68519	(0.006132839-0.04295798j)	-27.2515	0.0433935	-81.8751
5.3025	(0.01965426-0.03012969j)	-28.8804	0.0359734	-56.8827	-0.99279	(0.002797852-0.03603419j)	-28.8396	0.0361426	-85.5602	-1.49331	(0.008963327-0.02322825j)	-32.0768	0.0248976	-68.8994	-1.20252	(0.02349938-0.01943085j)	-30.3162	0.0304923	-39.5862	-0.69091	(0.01211355-0.03355607j)	-28.9526	0.0356756	-70.1507	-1.22436	(0.001412889-0.02223348j)	-33.0423	0.0222783	-86.3639	-1.50733	(0.01003717-0.01317067j)	-35.6191	0.0165593	-52.6895	-0.919606	(0.0003393783000000001-0.009613794j)	-40.3367	0.00961978	-87.9782	-1.53551	(-0.008171943-0.03500715j)	-28.8864	0.0359483	-103.14	-1.80013	(0.0016410489999999995-0.04208676j)	-27.5105	0.0421187	-87.7671
5.303	(0.01754717-0.02936053j)	-29.3183	0.0342044	-59.1356	-1.03211	(0.0007353595000000003-0.03438341j)	-29.271	0.0343913	-88.7748	-1.54941	(0.007011465-0.02424319j)	-31.9593	0.0252367	-73.8694	-1.28926	(0.02012105-0.01938006j)	-31.0766	0.0279364	-43.9253	-0.766642	(0.01006292-0.03274035j)	-29.3063	0.0342519	-72.9149	-1.27261	(-0.0007815142999999997-0.02122059j)	-33.459	0.021235	-92.1091	-1.60761	(0.008584223-0.01280255j)	-36.2416	0.0154141	-56.1578	-0.980138	(-0.0005096085-0.006898929j)	-43.2007	0.00691773	-94.2246	-1.64453	(-0.01082713-0.03400553j)	-28.9497	0.0356876	-107.661	-1.87904	(0.001147213-0.04160582j)	-27.6136	0.0416216	-88.4206
5.3035	(0.0128742-0.02861548j)	-30.0674	0.0313782	-65.7769	-1.14802	(-0.0037759589999999997-0.03500915j)	-29.0661	0.0352122	-96.1559	-1.67824	(0.003144263-0.02322587j)	-32.6017	0.0234377	-82.2903	-1.43624	(0.01628784-0.01895457j)	-32.0442	0.0249914	-49.3272	-0.860922	(0.006111946-0.03305208j)	-29.47	0.0336124	-79.5233	-1.38794	(-0.0037709780000000004-0.02073636j)	-33.524	0.0210765	-100.307	-1.75068	(0.005443027-0.01256464j)	-37.2701	0.0136929	-66.5776	-1.162	(-0.004452296-0.007913154j)	-40.8386	0.0090797	-119.364	-2.0833	(-0.01401766-0.03340472j)	-28.8194	0.0362266	-112.764	-1.96811	(-0.003911384-0.04167179j)	-27.5651	0.041855	-95.3622
5.304	(0.009807887-0.02914401j)	-30.2431	0.0307501	-71.4003	-1.24617	(-0.007801093-0.03403209j)	-29.1398	0.0349148	-102.911	-1.79613	(-0.0011374889999999998-0.02179704j)	-33.2202	0.0218267	-92.9873	-1.62293	(0.01313721-0.01927604j)	-32.6428	0.0233271	-55.7244	-0.972574	(0.0018029559999999997-0.03300876j)	-29.6145	0.033058	-86.8736	-1.51623	(-0.008973423-0.02128405j)	-32.7284	0.0230983	-112.86	-1.96979	(0.0014492669999999997-0.01329704j)	-37.4736	0.0133758	-83.7798	-1.46223	(-0.008685981-0.006664807j)	-39.213	0.0109483	-142.501	-2.48711	(-0.01888212-0.03377704j)	-28.2466	0.0386965	-119.206	-2.08054	(-0.008966983-0.0407224j)	-27.5977	0.041698	-102.418
5.3045	(0.008653545-0.03118572j)	-29.7987	0.0323641	-74.4915	-1.30012	(-0.009224135-0.03397877j)	-29.067	0.0352085	-105.188	-1.83588	(-0.003113612-0.02366322j)	-32.444	0.0238672	-97.4959	-1.70162	(0.01147003-0.02039913j)	-32.6147	0.0234027	-60.6518	-1.05857	(0.0007533417000000001-0.03349536j)	-29.4981	0.0335038	-88.7116	-1.54831	(-0.01002618-0.02189169j)	-32.3674	0.0240784	-114.607	-2.00028	(7.195528999999999e-05-0.01439296j)	-36.8369	0.0143931	-89.7136	-1.5658	(-0.009682794-0.008295213j)	-37.8897	0.0127502	-139.413	-2.43322	(-0.02083779-0.03314254j)	-28.1456	0.039149	-122.159	-2.13208	(-0.008979593-0.04162306j)	-27.4158	0.0425807	-102.174
5.305	(0.004577915-0.03004824j)	-30.344	0.030395	-81.3375	-1.41961	(-0.01291358-0.03564942j)	-28.4235	0.0379162	-109.912	-1.91833	(-0.007187014-0.02375377j)	-32.1049	0.0248172	-106.834	-1.8646	(0.008682315-0.02032005j)	-33.1132	0.0220972	-66.864	-1.167	(-0.00271036-0.03401927j)	-29.338	0.0341271	-94.5552	-1.6503	(-0.01386594-0.02241335j)	-31.5825	0.0263557	-121.743	-2.12481	(-0.003379559-0.01495004j)	-36.2907	0.0153273	-102.738	-1.79312	(-0.01249927-0.008549664j)	-36.3954	0.0151436	-145.627	-2.54168	(-0.0238994-0.03463677j)	-27.5181	0.0420819	-124.606	-2.17478	(-0.01333294-0.04232046j)	-27.058	0.044371	-107.487
5.3055	(0.0007980161000000004-0.03227277j)	-29.8206	0.0322826	-88.5835	-1.54607	(-0.01677687-0.03664982j)	-27.8923	0.0403072	-114.596	-2.00009	(-0.009456629-0.02516335j)	-31.4109	0.0268816	-110.597	-1.93028	(0.0048704609999999995-0.0219014j)	-32.9809	0.0224364	-77.4625	-1.35198	(-0.006126705-0.03524366j)	-28.9291	0.0357722	-99.8617	-1.74291	(-0.01643849-0.0231841j)	-30.9274	0.0284205	-125.338	-2.18756	(-0.007655979-0.0160761j)	-34.9887	0.017806	-115.465	-2.01525	(-0.01710601-0.009769185j)	-34.1111	0.019699	-150.269	-2.6227	(-0.02716571-0.03511659j)	-27.0528	0.0443976	-127.725	-2.22922	(-0.01677571-0.04261578j)	-26.7829	0.0457988	-111.487
5.306	(-0.0008709911-0.03382272j)	-29.413	0.0338339	-91.4751	-1.59654	(-0.01876864-0.036984j)	-27.6445	0.0414738	-116.907	-2.04041	(-0.01260204-0.02584894j)	-30.8251	0.0287572	-115.99	-2.02442	(0.002737004-0.02325992j)	-32.6081	0.0234204	-83.2888	-1.45366	(-0.008777231-0.03596877j)	-28.6303	0.0370242	-103.714	-1.81014	(-0.01969115-0.0245939j)	-30.0323	0.0315056	-128.683	-2.24593	(-0.009337286-0.017127j)	-34.1962	0.0195069	-118.598	-2.06993	(-0.01860963-0.01029387j)	-33.4459	0.0212669	-151.051	-2.63634	(-0.02972144-0.03546277j)	-26.6939	0.0462706	-129.966	-2.26834	(-0.01988-0.04398357j)	-26.3269	0.0482677	-114.322
5.3065	(-0.004502314-0.03475882j)	-29.1064	0.0350492	-97.3804	-1.69961	(-0.02124768-0.03791295j)	-27.238	0.043461	-119.268	-2.08161	(-0.0135968-0.02788966j)	-30.1651	0.0310275	-115.99	-2.02441	(0.00017276240000000005-0.02373992j)	-32.4902	0.0237405	-89.583	-1.56352	(-0.01067582-0.03663343j)	-28.3684	0.0381573	-106.247	-1.85437	(-0.02163825-0.02364834j)	-29.8824	0.032054	-132.459	-2.31184	(-0.01149152-0.01773584j)	-33.5007	0.0211333	-122.94	-2.14571	(-0.02146885-0.01064185j)	-32.4097	0.0239616	-153.633	-2.6814	(-0.03258689-0.03707227j)	-26.1328	0.0493585	-131.316	-2.29189	(-0.02275108-0.0444858j)	-26.0265	0.049966	-117.086
5.307	(-0.006306489-0.03533152j)	-28.9005	0.0358899	-100.12	-1.74743	(-0.0244441-0.03863657j)	-26.7979	0.0457198	-122.32	-2.13489	(-0.01608936-0.02706306j)	-30.0381	0.0314845	-120.732	-2.10717	(-0.001835316-0.02421903j)	-32.292	0.0242885	-94.3336	-1.64643	(-0.01442238-0.03734605j)	-27.9514	0.0400341	-111.116	-1.93933	(-0.02409016-0.02505925j)	-29.1782	0.0347606	-133.87	-2.33648	(-0.01262009-0.01787032j)	-33.2001	0.0218773	-125.23	-2.18567	(-0.02341804-0.01113044j)	-31.7244	0.0259286	-154.579	-2.6979	(-0.03479527-0.03638764j)	-25.9606	0.0503465	-133.719	-2.33383	(-0.02591285-0.04481975j)	-25.7182	0.0517715	-120.035
5.3075	(-0.009937562-0.03657357j)	-28.4273	0.0378996	-105.201	-1.83611	(-0.02733885-0.04117034j)	-26.1218	0.0494207	-123.586	-2.15698	(-0.01954226-0.03010412j)	-28.9003	0.0358909	-122.99	-2.14658	(-0.004234443-0.0267969j)	-31.3312	0.0271294	-98.9796	-1.72752	(-0.01745893-0.03982472j)	-27.2335	0.0434836	-113.672	-1.98396	(-0.02629346-0.02715115j)	-28.4511	0.0377959	-134.081	-2.34015	(-0.01709038-0.02020853j)	-31.5461	0.0264663	-130.221	-2.27279	(-0.02657032-0.01374497j)	-30.4822	0.029915	-152.647	-2.6642	(-0.03857449-0.03857091j)	-25.2641	0.05455	-135.003	-2.35624	(-0.02868751-0.0469998j)	-25.1828	0.0550632	-121.399
5.308	(-0.01197726-0.03910358j)	-27.7662	0.0408968	-107.03	-1.86802	(-0.02963689-0.04182145j)	-25.8048	0.051258	-125.323	-2.18731	(-0.02205977-0.03125335j)	-28.3464	0.0382545	-125.216	-2.18543	(-0.007741015-0.02866048j)	-30.5485	0.0296875	-105.115	-1.8346	(-0.02031227-0.03994341j)	-26.9722	0.0448114	-116.955	-2.04124	(-0.03003136-0.02828731j)	-27.6903	0.041256	-136.713	-2.38609	(-0.01896107-0.02138068j)	-30.8796	0.0285772	-131.568	-2.29629	(-0.02809686-0.0145289j)	-29.9977	0.031631	-152.656	-2.66436	(-0.04154701-0.03967911j)	-24.8141	0.0574507	-136.317	-2.37919	(-0.03078129-0.04852366j)	-24.8122	0.0574633	-122.389
5.3085	(-0.01392757-0.04155431j)	-27.1653	0.0438262	-108.529	-1.89419	(-0.03112253-0.04381687j)	-25.3932	0.053745	-125.386	-2.18839	(-0.02271752-0.03318615j)	-27.9118	0.040217	-124.394	-2.17108	(-0.00938517-0.03188965j)	-29.5663	0.033242	-106.399	-1.85702	(-0.02172842-0.04302299j)	-26.3393	0.0481986	-116.796	-2.03847	(-0.03092678-0.03045063j)	-27.2499	0.0434017	-135.444	-2.36395	(-0.01991104-0.0245946j)	-29.9942	0.031644	-128.993	-2.25135	(-0.03058228-0.01698416j)	-29.1231	0.034982	-150.954	-2.63464	(-0.04240357-0.0415293j)	-24.5312	0.0593527	-135.597	-2.36661	(-0.0328106-0.0507204j)	-24.3781	0.0604077	-122.898
5.309	(-0.01704171-0.04461556j)	-26.4188	0.0477595	-110.905	-1.93566	(-0.03506562-0.04626993j)	-24.7231	0.058056	-127.157	-2.2193	(-0.02769627-0.03649562j)	-26.7798	0.045815	-127.195	-2.21996	(-0.01159238-0.03362935j)	-28.978	0.0355713	-109.02	-1.90275	(-0.02629978-0.04663533j)	-25.4264	0.05354	-119.421	-2.08428	(-0.03466687-0.03363439j)	-26.3207	0.0483018	-135.866	-2.37131	(-0.02423188-0.02649051j)	-28.8977	0.0359017	-132.45	-2.31169	(-0.03326276-0.020256j)	-28.191	0.038945	-148.66	-2.5946	(-0.04630071-0.04386265j)	-23.9065	0.0637784	-136.549	-2.38323	(-0.03599243-0.05274502j)	-23.8961	0.0638552	-124.309
5.3095	(-0.01881879-0.04550197j)	-26.1536	0.04924	-112.469	-1.96296	(-0.03540887-0.0476434j)	-24.53	0.0593606	-126.62	-2.20994	(-0.02839271-0.03712801j)	-26.6062	0.0467401	-127.406	-2.22365	(-0.013967-0.03507572j)	-28.4607	0.0377542	-111.712	-1.94975	(-0.02586398-0.04756352j)	-25.3295	0.0541409	-118.536	-2.06885	(-0.03554841-0.03408175j)	-26.1524	0.0492469	-136.207	-2.37725	(-0.02473112-0.02714445j)	-28.7017	0.0367212	-132.336	-2.30971	(-0.03464624-0.02124583j)	-27.8206	0.0406417	-148.482	-2.59151	(-0.04797708-0.0451079j)	-23.6286	0.0658523	-136.765	-2.38701	(-0.03724853-0.05410756j)	-23.6501	0.0656893	-124.544
5.31	(-0.01971444-0.04782856j)	-25.7248	0.0517323	-112.401	-1.96177	(-0.0371149-0.04953658j)	-24.1664	0.0618982	-126.842	-2.21381	(-0.03004071-0.03996616j)	-26.0211	0.0499974	-126.93	-2.21535	(-0.01486-0.03771227j)	-27.8435	0.0405344	-111.506	-1.94615	(-0.02790665-0.05010045j)	-24.8296	0.0573484	-119.118	-2.07901	(-0.03799985-0.03667331j)	-25.5456	0.0528102	-136.018	-2.37396	(-0.02621779-0.03022001j)	-27.9571	0.0400078	-130.944	-2.2854	(-0.03524936-0.02293925j)	-27.5234	0.0420562	-146.945	-2.56468	(-0.04857833-0.04667496j)	-23.431	0.0673677	-136.145	-2.37617	(-0.03862169-0.05641883j)	-23.3024	0.0683719	-124.394
5.3105	(-0.02122121-0.05071375j)	-25.1967	0.0549748	-112.707	-1.96711	(-0.03972686-0.05412774j)	-23.4601	0.0671419	-126.277	-2.20394	(-0.03191619-0.04186285j)	-25.5734	0.0526416	-127.322	-2.22219	(-0.01602555-0.0409733j)	-27.1318	0.0439958	-111.362	-1.94363	(-0.02964605-0.05193585j)	-24.4658	0.0598015	-119.719	-2.08948	(-0.03811235-0.03883388j)	-25.2862	0.0544116	-134.463	-2.34682	(-0.02688434-0.03272872j)	-27.4619	0.0423549	-129.401	-2.25847	(-0.03662419-0.02585548j)	-26.9684	0.0448312	-144.779	-2.52687	(-0.05004489-0.05049948j)	-22.9631	0.0710963	-134.741	-2.35167	(-0.03965422-0.05973779j)	-22.8895	0.0717012	-123.576
5.311	(-0.02305778-0.05249858j)	-24.831	0.057339	-113.711	-1.98464	(-0.04085049-0.0552871j)	-23.2556	0.0687417	-126.46	-2.20714	(-0.03409772-0.04349788j)	-25.1503	0.0552695	-128.093	-2.23564	(-0.01685148-0.04263219j)	-26.7748	0.0458419	-111.568	-1.94722	(-0.03170059-0.05438239j)	-24.0204	0.0629474	-120.239	-2.09856	(-0.03794405-0.04224372j)	-24.9157	0.0567828	-131.931	-2.30263	(-0.02915971-0.03531055j)	-26.7838	0.0457944	-129.55	-2.26108	(-0.03769211-0.02701909j)	-26.6741	0.0463759	-144.366	-2.51966	(-0.05207764-0.05264654j)	-22.6092	0.0740523	-134.689	-2.35076	(-0.04252163-0.06111581j)	-22.5624	0.0744529	-124.828
5.3115	(-0.02485956-0.05545287j)	-24.3262	0.0607702	-114.147	-1.99224	(-0.04213235-0.05743404j)	-22.9467	0.0712306	-126.263	-2.2037	(-0.03383953-0.04786071j)	-24.6398	0.0586154	-125.262	-2.18623	(-0.01904613-0.04462224j)	-26.2821	0.048517	-113.114	-1.97422	(-0.03275399-0.05685291j)	-23.6602	0.0656131	-119.947	-2.09347	(-0.04080003-0.04371726j)	-24.4662	0.0597983	-133.023	-2.32169	(-0.0298739-0.0381459j)	-26.2938	0.0484516	-128.066	-2.23518	(-0.03865102-0.0298772j)	-26.2223	0.0488523	-142.296	-2.48353	(-0.05267679-0.05447406j)	-22.4092	0.0757778	-134.039	-2.33942	(-0.04345423-0.06279455j)	-22.3423	0.0763638	-124.683
5.312	(-0.02592255-0.05769371j)	-23.9788	0.0632498	-114.195	-1.99308	(-0.04318332-0.05882182j)	-22.737	0.0729713	-126.284	-2.20407	(-0.03437142-0.04969269j)	-24.3762	0.0604215	-124.671	-2.17592	(-0.01967948-0.04762394j)	-25.7588	0.0515298	-112.452	-1.96265	(-0.03302686-0.05973853j)	-23.3166	0.0682603	-118.936	-2.07583	(-0.04171299-0.04470422j)	-24.2731	0.0611428	-133.018	-2.32159	(-0.02928246-0.04006952j)	-26.0853	0.0496289	-126.159	-2.20189	(-0.03896265-0.03249861j)	-25.8935	0.050737	-140.169	-2.4464	(-0.05363584-0.05647825j)	-22.1705	0.0778884	-133.521	-2.33039	(-0.04485222-0.0653553j)	-22.0183	0.0792656	-124.461
5.3125	(-0.02476844-0.0612268j)	-23.6029	0.0660469	-112.025	-1.95521	(-0.04267064-0.0618552j)	-22.4819	0.0751455	-124.6	-2.17468	(-0.03354271-0.05280143j)	-24.0748	0.0625548	-122.426	-2.13674	(-0.01860529-0.05165949j)	-25.2073	0.0549077	-109.807	-1.91649	(-0.0326982-0.06173941j)	-23.115	0.0698636	-117.906	-2.05786	(-0.04072804-0.05002971j)	-23.8072	0.0645116	-129.148	-2.25406	(-0.02993924-0.04288393j)	-25.6298	0.052301	-124.921	-2.18028	(-0.03839809-0.03601387j)	-25.573	0.0526442	-136.835	-2.38822	(-0.05367363-0.05917624j)	-21.95	0.0798917	-132.208	-2.30747	(-0.04410035-0.06872559j)	-21.76	0.0816581	-122.688
5.313	(-0.02590935-0.06256557j)	-23.3859	0.0677181	-112.495	-1.96341	(-0.04234558-0.06362543j)	-22.3349	0.0764287	-123.646	-2.15802	(-0.03462472-0.05406667j)	-23.8488	0.0642034	-122.636	-2.1404	(-0.02001799-0.05333155j)	-24.8879	0.0569647	-110.574	-1.92987	(-0.0334298-0.06465717j)	-22.7588	0.0727881	-117.34	-2.04798	(-0.04060848-0.05102864j)	-23.7131	0.0652148	-128.513	-2.24297	(-0.02950791-0.04553501j)	-25.3104	0.0542601	-122.944	-2.14578	(-0.03865497-0.03729041j)	-25.3989	0.0537102	-136.029	-2.37416	(-0.05379112-0.06158913j)	-21.7479	0.0817723	-131.134	-2.28871	(-0.04494444-0.07068437j)	-21.5389	0.0837633	-122.45
5.3135	(-0.026972-0.06613299j)	-22.9234	0.0714217	-112.188	-1.95805	(-0.04335873-0.06613074j)	-22.0389	0.0790775	-123.251	-2.15113	(-0.03487075-0.05766074j)	-23.4287	0.0673849	-121.164	-2.11471	(-0.01908614-0.05626499j)	-24.5222	0.0594141	-108.738	-1.89783	(-0.03369489-0.06721789j)	-22.4768	0.0751904	-116.624	-2.03547	(-0.04163597-0.05278406j)	-23.4489	0.0672288	-128.266	-2.23867	(-0.03127701-0.04707462j)	-24.9563	0.0565179	-123.601	-2.15724	(-0.03897582-0.0393624j)	-25.1307	0.0553942	-134.717	-2.35126	(-0.05511629-0.0631283j)	-21.5348	0.0838033	-131.124	-2.28854	(-0.04584138-0.07305534j)	-21.2851	0.0862468	-122.108
5.314	(-0.02466477-0.06899867j)	-22.7009	0.0732746	-109.67	-1.91411	(-0.04276435-0.06892774j)	-21.8179	0.0811161	-121.816	-2.1261	(-0.03493875-0.05971185j)	-23.2001	0.0691825	-120.333	-2.1002	(-0.01847795-0.05924364j)	-24.144	0.0620584	-107.323	-1.87313	(-0.03476442-0.07002512j)	-22.1381	0.0781798	-116.402	-2.03161	(-0.04093034-0.05625949j)	-23.1512	0.0695731	-126.037	-2.19976	(-0.03011144-0.05106487j)	-24.5416	0.0592817	-120.527	-2.10359	(-0.03905366-0.04208414j)	-24.8198	0.0574131	-132.861	-2.31886	(-0.05276592-0.06661689j)	-21.4134	0.0849827	-128.382	-2.24069	(-0.04614871-0.07668009j)	-20.9639	0.089496	-121.041
5.3145	(-0.02473975-0.07251086j)	-22.3137	0.0766151	-108.839	-1.8996	(-0.04191914-0.07284043j)	-21.5101	0.0840413	-119.92	-2.093	(-0.03547206-0.06280366j)	-22.8378	0.0721288	-119.458	-2.08494	(-0.01811595-0.06298539j)	-23.67	0.0655389	-106.046	-1.85086	(-0.0324866-0.07188525j)	-22.0601	0.0788852	-114.319	-1.99525	(-0.04056363-0.05943416j)	-22.8585	0.0719571	-124.313	-2.16968	(-0.02888129-0.05371469j)	-24.2953	0.0609869	-118.266	-2.06413	(-0.03698122-0.04622351j)	-24.5541	0.0591965	-128.662	-2.24557	(-0.05353975-0.06950936j)	-21.1362	0.0877386	-127.605	-2.22713	(-0.04461721-0.07824022j)	-20.9086	0.0900679	-119.694
5.315	(-0.02437792-0.07577889j)	-21.9814	0.0796035	-107.833	-1.88204	(-0.04149948-0.0747992j)	-21.3566	0.0855402	-119.022	-2.07733	(-0.03362955-0.06481309j)	-22.7314	0.0730184	-117.423	-2.04943	(-0.01816079-0.06428093j)	-23.5048	0.0667971	-105.776	-1.84614	(-0.03307013-0.07467539j)	-21.7587	0.0816704	-113.886	-1.98769	(-0.03984838-0.06136056j)	-22.714	0.0731643	-123	-2.14676	(-0.02790142-0.05544911j)	-24.1419	0.0620733	-116.711	-2.03699	(-0.03655093-0.04886635j)	-24.29	0.0610237	-126.796	-2.213	(-0.05318691-0.07143308j)	-21.0064	0.0890592	-126.67	-2.21081	(-0.04371185-0.08142892j)	-20.6847	0.0924197	-118.227
5.3155	(-0.02454862-0.07618265j)	-21.9338	0.0800402	-107.861	-1.88252	(-0.04154849-0.07552513j)	-21.2899	0.0861993	-118.816	-2.07374	(-0.03292835-0.06718237j)	-22.5199	0.0748181	-116.111	-2.02652	(-0.01789562-0.06646407j)	-23.2443	0.0688311	-105.07	-1.83381	(-0.03281777-0.07681582j)	-21.5629	0.0835325	-113.133	-1.97455	(-0.03852493-0.06281934j)	-22.6517	0.0736915	-121.519	-2.12091	(-0.02751408-0.05780094j)	-23.8743	0.0640154	-115.455	-2.01507	(-0.03596072-0.05035688j)	-24.1692	0.0618788	-125.531	-2.19093	(-0.05270956-0.07198755j)	-20.9906	0.0892217	-126.212	-2.20281	(-0.04518755-0.08331212j)	-20.4659	0.0947778	-118.475
5.316	(-0.02208073-0.07910302j)	-21.7103	0.082127	-105.596	-1.84301	(-0.03919876-0.07891259j)	-21.0993	0.0881121	-116.415	-2.03183	(-0.03162622-0.06929395j)	-22.3643	0.07617	-114.532	-1.99897	(-0.01562673-0.06897563j)	-23.0087	0.0707236	-102.765	-1.79359	(-0.03071615-0.07883975j)	-21.4514	0.084612	-111.286	-1.94231	(-0.03636431-0.06542041j)	-22.5164	0.0748478	-119.068	-2.07812	(-0.02590665-0.0604241j)	-23.6429	0.0657436	-113.207	-1.97584	(-0.03424798-0.05230889j)	-24.0792	0.0625231	-123.214	-2.15049	(-0.05066502-0.0750577j)	-20.8615	0.0905572	-124.02	-2.16456	(-0.04337327-0.0841829j)	-20.473	0.0946995	-117.259
5.3165	(-0.02239282-0.08060516j)	-21.5499	0.0836578	-105.526	-1.84177	(-0.03975513-0.08011329j)	-20.9699	0.0894349	-116.392	-2.03143	(-0.03005567-0.07172748j)	-22.1838	0.07777	-112.735	-1.9676	(-0.01413886-0.07182443j)	-22.7094	0.0732028	-101.136	-1.76516	(-0.02952558-0.08125903j)	-21.264	0.0864569	-109.969	-1.91932	(-0.03594261-0.06674332j)	-22.4059	0.0758059	-118.303	-2.06478	(-0.02491845-0.06199132j)	-23.5029	0.0668121	-111.898	-1.953	(-0.03330747-0.0529408j)	-24.0759	0.0625469	-122.176	-2.13237	(-0.05103309-0.07556655j)	-20.8015	0.0911849	-124.033	-2.16478	(-0.04164677-0.08535461j)	-20.448	0.094973	-116.009
5.317	(-0.01950418-0.08234143j)	-21.4506	0.0846199	-103.326	-1.80338	(-0.03826491-0.08092159j)	-20.9623	0.0895126	-115.308	-2.0125	(-0.02811276-0.07163594j)	-22.2753	0.0769548	-111.427	-1.94477	(-0.01240853-0.0724204j)	-22.6771	0.0734758	-99.7227	-1.74049	(-0.02824847-0.08230381j)	-21.208	0.0870166	-108.943	-1.90142	(-0.03445913-0.06865832j)	-22.2905	0.0768205	-116.652	-2.03596	(-0.0225902-0.06318405j)	-23.4654	0.067101	-109.673	-1.91416	(-0.03125193-0.05479833j)	-24.0017	0.0630836	-119.696	-2.0891	(-0.04814036-0.07687967j)	-20.8471	0.0907082	-122.054	-2.13024	(-0.04082448-0.08732408j)	-20.3188	0.0963957	-115.056
5.3175	(-0.01831945-0.08406974j)	-21.3057	0.0860426	-102.293	-1.78535	(-0.0372029-0.08164474j)	-20.9421	0.0897213	-114.497	-1.99835	(-0.02656293-0.07525904j)	-21.9589	0.0798092	-109.441	-1.9101	(-0.01202169-0.0742472j)	-22.474	0.0752141	-99.1972	-1.73132	(-0.02733494-0.08456326j)	-21.0247	0.0888715	-107.913	-1.88344	(-0.03258906-0.06964501j)	-22.2823	0.0768926	-115.076	-2.00846	(-0.02127026-0.06479274j)	-23.325	0.0681947	-108.174	-1.88799	(-0.02970277-0.05704254j)	-23.8341	0.0643126	-117.507	-2.05088	(-0.04681097-0.07757013j)	-20.8574	0.0906002	-121.11	-2.11376	(-0.03983389-0.08867617j)	-20.2456	0.0972121	-114.19
5.318	(-0.01633218-0.08516221j)	-21.2382	0.0867141	-100.856	-1.76027	(-0.0333974-0.0843556j)	-20.8453	0.0907263	-111.599	-1.94777	(-0.02352058-0.0756091j)	-22.0274	0.079183	-107.28	-1.87239	(-0.009032004-0.07598133j)	-22.3249	0.0765163	-96.779	-1.68911	(-0.02376432-0.08480742j)	-21.103	0.0880741	-105.654	-1.844	(-0.0307131-0.07036982j)	-22.295	0.0767802	-113.579	-1.98233	(-0.01947878-0.06683115j)	-23.1463	0.069612	-106.249	-1.8544	(-0.02686362-0.05867925j)	-23.8039	0.0645361	-114.599	-2.00012	(-0.04356313-0.07917041j)	-20.8801	0.0903643	-118.822	-2.07383	(-0.03665978-0.08932012j)	-20.3049	0.0965506	-112.315
5.3185	(-0.01419125-0.08706231j)	-21.0895	0.0882113	-99.2579	-1.73238	(-0.0315909-0.08553696j)	-20.8016	0.0911842	-110.27	-1.92458	(-0.02243497-0.0776258j)	-21.8515	0.0808028	-106.12	-1.85214	(-0.00694897-0.07704967j)	-22.2294	0.0773624	-95.1535	-1.66074	(-0.02250904-0.08691408j)	-20.9363	0.0897815	-104.519	-1.82421	(-0.02807573-0.07265563j)	-22.1702	0.0778915	-111.128	-1.93954	(-0.0162876-0.06735856j)	-23.1854	0.0692998	-103.593	-1.80805	(-0.0238162-0.05958039j)	-23.8542	0.0641641	-111.788	-1.95107	(-0.04241885-0.08131969j)	-20.7509	0.0917183	-117.548	-2.0516	(-0.03512459-0.09111257j)	-20.2067	0.0976485	-111.082
5.319	(-0.01027534-0.08706261j)	-21.1433	0.0876669	-96.731	-1.68828	(-0.02871792-0.0850363j)	-20.9389	0.0897546	-108.661	-1.89648	(-0.01960554-0.07670712j)	-22.0285	0.079173	-104.337	-1.82103	(-0.003650292-0.07744096j)	-22.2109	0.0775269	-92.6987	-1.6179	(-0.01996678-0.08687238j)	-20.9988	0.0891374	-102.944	-1.79671	(-0.02607004-0.07136712j)	-22.3861	0.0759797	-110.067	-1.92103	(-0.01235573-0.06792625j)	-23.2179	0.0690409	-100.309	-1.75073	(-0.02097555-0.05991488j)	-23.9472	0.0634804	-109.295	-1.90755	(-0.03872927-0.08091151j)	-20.9439	0.089703	-115.579	-2.01723	(-0.03267628-0.09074533j)	-20.314	0.0964492	-109.803
5.3195	(-0.01019054-0.08852167j)	-21.0018	0.0891063	-96.5669	-1.68541	(-0.02740138-0.0873098j)	-20.7708	0.0915087	-107.424	-1.8749	(-0.01752803-0.07833589j)	-21.9086	0.0802729	-102.612	-1.79093	(-0.002298713-0.07984177j)	-21.9518	0.0798749	-91.6491	-1.59958	(-0.01911947-0.0885425j)	-20.859	0.0905833	-102.185	-1.78347	(-0.02352448-0.07537224j)	-22.0521	0.0789581	-107.334	-1.87333	(-0.01241854-0.06940801j)	-23.035	0.0705102	-100.144	-1.74784	(-0.01952913-0.06115608j)	-23.8495	0.0641985	-107.71	-1.87989	(-0.03752826-0.08156727j)	-20.9358	0.0897864	-114.707	-2.00201	(-0.03049964-0.09246672j)	-20.2318	0.0973669	-108.255
5.32	(-0.007926635-0.08923384j)	-20.9553	0.0895852	-95.0763	-1.65939	(-0.02551764-0.08724583j)	-20.8286	0.090901	-106.303	-1.85534	(-0.0155584-0.07879444j)	-21.904	0.0803158	-101.17	-1.76574	(-0.001750242-0.08016497j)	-21.9182	0.0801841	-91.2507	-1.59263	(-0.01701956-0.08868369j)	-20.886	0.0903021	-100.864	-1.7604	(-0.02140765-0.07425568j)	-22.2387	0.07728	-106.082	-1.85148	(-0.009532585-0.07002945j)	-23.0147	0.0706753	-97.7516	-1.70609	(-0.01730575-0.06141395j)	-23.9028	0.0638057	-105.737	-1.84546	(-0.03612358-0.08244837j)	-20.9137	0.0900147	-113.66	-1.98374	(-0.03031673-0.09203235j)	-20.2738	0.0968971	-108.233
5.3205	(-0.005203741-0.08917493j)	-20.9804	0.0893266	-93.3397	-1.62908	(-0.02382363-0.08710459j)	-20.8859	0.0903038	-105.297	-1.83777	(-0.01426214-0.07888106j)	-21.9208	0.08016	-100.249	-1.74967	(0.001251182-0.08077726j)	-21.8532	0.0807869	-89.1126	-1.55531	(-0.01477139-0.08906566j)	-20.888	0.0902823	-99.4167	-1.73515	(-0.01915635-0.07380702j)	-22.3549	0.0762525	-104.55	-1.82474	(-0.007546649-0.06974595j)	-23.0791	0.070153	-96.1755	-1.67858	(-0.0139484-0.06148164j)	-24.0071	0.063044	-102.782	-1.79389	(-0.03404487-0.08216164j)	-21.0185	0.0889359	-112.507	-1.96362	(-0.02709886-0.09254882j)	-20.3153	0.0964346	-106.32
5.321	(-0.003215458-0.08879607j)	-21.0264	0.0888543	-92.0739	-1.60699	(-0.01962874-0.08618459j)	-21.0718	0.0883916	-102.83	-1.79473	(-0.01121028-0.07853995j)	-22.0106	0.079336	-98.1232	-1.71257	(0.004032451-0.08153437j)	-21.7626	0.081634	-87.1686	-1.52138	(-0.01205418-0.08780113j)	-21.0489	0.0886247	-97.8172	-1.70723	(-0.01727307-0.07369594j)	-22.4189	0.0756931	-103.191	-1.80102	(-0.005372969-0.06980178j)	-23.097	0.0700083	-94.4016	-1.64762	(-0.01277948-0.0614142j)	-24.0505	0.0627297	-101.755	-1.77596	(-0.03176393-0.08126928j)	-21.1841	0.0872562	-111.348	-1.94339	(-0.02497825-0.09141006j)	-20.4674	0.0947613	-105.283
5.3215	(-0.001241065-0.0898126j)	-20.9324	0.0898212	-90.7917	-1.58461	(-0.01969287-0.0862992j)	-21.0594	0.0885176	-102.854	-1.79515	(-0.009064682-0.07830831j)	-22.066	0.0788312	-96.603	-1.68604	(0.005574279-0.08131691j)	-21.776	0.0815077	-86.0785	-1.50235	(-0.01060163-0.08908655j)	-20.9427	0.0897151	-96.7865	-1.68924	(-0.01412765-0.07343202j)	-22.5244	0.0747787	-100.89	-1.76086	(-0.002266082-0.07010881j)	-23.08	0.0701454	-91.8513	-1.60311	(-0.009937902-0.06060862j)	-24.2341	0.061418	-99.3118	-1.73332	(-0.02770773-0.08124566j)	-21.3262	0.0858404	-108.831	-1.89946	(-0.02285178-0.09215578j)	-20.4504	0.0949468	-103.927
5.322	(0.001879814-0.08898439j)	-21.0118	0.0890042	-88.7898	-1.54967	(-0.01612599-0.08618098j)	-21.1423	0.0876767	-100.598	-1.75577	(-0.005710768-0.07778317j)	-22.1589	0.0779925	-94.1991	-1.64408	(0.009219949-0.08066072j)	-21.8104	0.081186	-83.4791	-1.45698	(-0.007737699-0.08722552j)	-21.1531	0.087568	-95.0694	-1.65927	(-0.01242702-0.07218435j)	-22.7043	0.0732462	-99.7681	-1.74128	(0.0012613010000000003-0.06849409j)	-23.2855	0.0685057	-88.945	-1.55238	(-0.006162917-0.05979292j)	-24.4211	0.0601097	-95.8848	-1.6735	(-0.02676314-0.08011394j)	-21.4664	0.084466	-108.473	-1.8932	(-0.02040333-0.09099278j)	-20.6068	0.0932522	-102.638
5.3225	(0.003668095-0.08734338j)	-21.1677	0.0874204	-87.5952	-1.52882	(-0.0144901-0.08395321j)	-21.3918	0.0851945	-99.7926	-1.74171	(-0.003620397-0.07649194j)	-22.318	0.0765776	-92.7098	-1.61809	(0.01138288-0.07841853j)	-22.0211	0.0792404	-81.7409	-1.42665	(-0.005300353-0.08615132j)	-21.2784	0.0863142	-93.5206	-1.63224	(-0.009870124-0.07165478j)	-22.8135	0.0723314	-97.8429	-1.70768	(0.003679923-0.06735941j)	-23.4191	0.0674599	-86.873	-1.51622	(-0.003844902-0.05850307j)	-24.6377	0.0586293	-93.7601	-1.63642	(-0.02399095-0.07917107j)	-21.6471	0.0827262	-106.858	-1.86503	(-0.01867157-0.09107544j)	-20.6332	0.0929697	-101.586
5.323	(0.005982139-0.08621239j)	-21.2677	0.0864197	-86.0307	-1.50152	(-0.01117684-0.08274475j)	-21.5667	0.0834962	-97.6927	-1.70506	(-0.001424833-0.07624514j)	-22.3542	0.0762585	-91.0706	-1.58948	(0.01313589-0.07842272j)	-21.991	0.0795152	-80.4912	-1.40484	(-0.002919929-0.08604983j)	-21.3	0.0860994	-91.9435	-1.60472	(-0.007186545-0.06966719j)	-23.0935	0.0700369	-95.8895	-1.67359	(0.003829944-0.06599685j)	-23.5949	0.0661079	-86.6787	-1.51283	(-0.0007026004-0.05775637j)	-24.7674	0.0577606	-90.697	-1.58296	(-0.0215902-0.07725364j)	-21.915	0.0802138	-105.614	-1.84331	(-0.01527946-0.08901057j)	-20.885	0.0903125	-99.7404
5.3235	(0.008346045-0.08487581j)	-21.3825	0.0852852	-84.384	-1.47278	(-0.01028587-0.0818295j)	-21.6737	0.0824734	-97.1644	-1.69584	(0.0002116971000000001-0.07420948j)	-22.5908	0.0742098	-89.8366	-1.56794	(0.01504193-0.07655075j)	-22.1565	0.0780146	-78.8832	-1.37677	(-0.001954596-0.08458521j)	-21.4518	0.0846078	-91.3238	-1.5939	(-0.005241349-0.06944916j)	-23.142	0.0696467	-94.3159	-1.64612	(0.00638727-0.06676117j)	-23.4699	0.067066	-84.535	-1.47541	(0.0007424672-0.05639565j)	-24.9743	0.0564005	-89.2457	-1.55763	(-0.02076973-0.07670639j)	-21.9961	0.0794686	-105.151	-1.83522	(-0.01386473-0.08573104j)	-21.2251	0.0868449	-99.1865
5.324	(0.01085491-0.08347736j)	-21.4958	0.0841802	-82.5912	-1.44149	(-0.008041259-0.0793689j)	-21.9626	0.0797752	-95.7852	-1.67177	(0.003354417-0.07170212j)	-22.8799	0.0717805	-87.3215	-1.52405	(0.01783962-0.07602914j)	-22.1476	0.0780941	-76.7949	-1.34032	(0.001431394-0.08280175j)	-21.6379	0.0828141	-89.0096	-1.55351	(-0.002064393-0.06686396j)	-23.492	0.0668958	-91.7684	-1.60166	(0.01031873-0.06331369j)	-23.8562	0.064149	-80.7434	-1.40924	(0.00354518-0.05405524j)	-25.3246	0.0541714	-86.2477	-1.50531	(-0.01687681-0.07365475j)	-22.4338	0.0755635	-102.906	-1.79604	(-0.01162557-0.08498212j)	-21.3329	0.0857736	-97.7897
5.3245	(0.01185548-0.08168219j)	-21.6669	0.0825381	-81.7417	-1.42666	(-0.005641011-0.07769482j)	-22.1693	0.0778993	-94.1527	-1.64327	(0.004700455-0.06931855j)	-23.1631	0.0694777	-86.1207	-1.50309	(0.01921394-0.07330985j)	-22.4082	0.0757859	-75.3136	-1.31447	(0.002746148-0.07910405j)	-22.0308	0.0791517	-88.0117	-1.53609	(0.0006727919999999997-0.06453817j)	-23.8032	0.0645417	-89.4027	-1.56037	(0.01172662-0.06099848j)	-24.136	0.0621154	-79.118	-1.38087	(0.005522656-0.05245495j)	-25.5564	0.0527449	-83.9898	-1.4659	(-0.01635037-0.07106153j)	-22.7433	0.0729183	-102.958	-1.79695	(-0.0101169-0.08302226j)	-21.5521	0.0836364	-96.9477
5.325	(0.01239708-0.08103083j)	-21.7265	0.0819737	-81.3016	-1.41898	(-0.004515732-0.07580118j)	-22.3911	0.0759356	-93.4093	-1.6303	(0.005567656-0.07022677j)	-23.0427	0.0704471	-85.467	-1.49168	(0.02057349-0.0722626j)	-22.4832	0.0751342	-74.1081	-1.29343	(0.003252208-0.07862337j)	-22.0815	0.0786906	-87.6313	-1.52946	(-0.00010669650000000004-0.06307848j)	-24.0024	0.0630786	-90.0969	-1.57249	(0.01260944-0.06053092j)	-24.176	0.0618303	-78.2328	-1.36542	(0.006038927-0.05041083j)	-25.8876	0.0507713	-83.1688	-1.45157	(-0.01461469-0.06936462j)	-22.9886	0.0708875	-101.898	-1.77845	(-0.008490316-0.081715j)	-21.7073	0.0821549	-95.9318
5.3255	(0.01480928-0.07806527j)	-21.9973	0.0794575	-79.2584	-1.38332	(-0.002907199-0.07257608j)	-22.7772	0.0726343	-92.2939	-1.61083	(0.007451423-0.06649211j)	-23.4904	0.0669083	-83.6058	-1.4592	(0.02196096-0.07063939j)	-22.6184	0.0739744	-72.7301	-1.26938	(0.005487554-0.07596628j)	-22.365	0.0761642	-85.8683	-1.49868	(0.002905018-0.06121519j)	-24.253	0.0612841	-87.283	-1.52338	(0.01472996-0.05843083j)	-24.3996	0.0602589	-75.851	-1.32385	(0.009417485-0.04937826j)	-25.9741	0.0502683	-79.2022	-1.38234	(-0.01173369-0.06750634j)	-23.2838	0.0685185	-99.8604	-1.74289	(-0.006162611-0.0784474j)	-22.0817	0.0786891	-94.4918
5.326	(0.01748143-0.07511905j)	-22.2559	0.0771263	-76.8995	-1.34215	(0.0004651899999999999-0.07196749j)	-22.8571	0.071969	-89.6297	-1.56433	(0.01018517-0.06504187j)	-23.6309	0.0658345	-81.1001	-1.41546	(0.02440717-0.06920623j)	-22.688	0.073384	-70.5736	-1.23174	(0.008402461-0.0749465j)	-22.4507	0.075416	-83.6031	-1.45915	(0.004697942-0.0590384j)	-24.5499	0.059225	-85.4503	-1.49139	(0.01624004-0.05579031j)	-24.7156	0.0581059	-73.7702	-1.28753	(0.01150429-0.04721661j)	-26.2676	0.0485979	-76.3067	-1.3318	(-0.01000824-0.06528085j)	-23.6034	0.0660436	-98.7162	-1.72292	(-0.004571689-0.0756526j)	-22.4077	0.0757906	-93.4582
5.3265	(0.0171923-0.0737315j)	-22.417	0.0757094	-76.8746	-1.34172	(0.0005604061-0.0694554j)	-23.1656	0.0694577	-89.5377	-1.56273	(0.01079478-0.06274039j)	-23.9224	0.0636623	-80.2376	-1.40041	(0.0250192-0.06631148j)	-22.9902	0.0708743	-69.3286	-1.21001	(0.008789196-0.07185802j)	-22.806	0.0723935	-83.0266	-1.44909	(0.005982991-0.05594641j)	-24.9952	0.0562654	-83.8959	-1.46426	(0.01852875-0.05351014j)	-24.9395	0.0566273	-70.9008	-1.23745	(0.01173739-0.04488156j)	-26.6713	0.046391	-75.3443	-1.31501	(-0.009131234-0.06262409j)	-23.9738	0.0632863	-98.2958	-1.71559	(-0.004324488-0.07365516j)	-22.641	0.073782	-93.3601
5.327	(0.01912018-0.07008143j)	-22.7761	0.0726429	-74.7395	-1.30445	(0.0008079681-0.06585622j)	-23.6274	0.0658612	-89.2971	-1.55853	(0.01245657-0.05924773j)	-24.3587	0.060543	-78.1267	-1.36357	(0.02681918-0.06296937j)	-23.2935	0.0684427	-66.9304	-1.16816	(0.009879577-0.0683234j)	-23.2187	0.069034	-81.772	-1.42719	(0.007780722-0.05318443j)	-25.3923	0.0537506	-81.6768	-1.42553	(0.01966326-0.05038654j)	-25.3381	0.0540874	-68.6819	-1.19872	(0.01417839-0.04135204j)	-27.1874	0.0437152	-71.0747	-1.24049	(-0.008629988-0.05881186j)	-24.5182	0.0594417	-98.3479	-1.7165	(-0.003857482-0.07010014j)	-23.0725	0.0702062	-93.1497
5.3275	(0.01908431-0.06764134j)	-23.0631	0.070282	-74.2441	-1.2958	(0.001180675-0.06299698j)	-24.0121	0.063008	-88.9263	-1.55206	(0.01251275-0.05635547j)	-24.7723	0.0577279	-77.4815	-1.35231	(0.02825052-0.06040436j)	-23.5195	0.0666842	-64.935	-1.13333	(0.01075379-0.06616131j)	-23.4747	0.0670296	-80.7679	-1.40967	(0.008155888-0.04966094j)	-25.9641	0.0503262	-80.6735	-1.40802	(0.02098818-0.04857515j)	-25.5283	0.0529155	-66.632	-1.16295	(0.01421673-0.03866504j)	-27.7029	0.0411959	-69.8121	-1.21845	(-0.008911959-0.05553437j)	-24.9983	0.0562449	-99.1169	-1.72992	(-0.002363724-0.06815657j)	-23.3246	0.0681975	-91.9863
5.328	(0.01927101-0.06475379j)	-23.4061	0.0675605	-73.4268	-1.28154	(0.002790028-0.05959006j)	-24.487	0.0596553	-87.3193	-1.52401	(0.01360448-0.05232806j)	-25.3413	0.0540676	-75.4266	-1.31644	(0.02835179-0.05763637j)	-23.8449	0.0642322	-63.8071	-1.11364	(0.0102523-0.06191685j)	-24.0464	0.0627599	-80.5982	-1.4067	(0.009197494-0.04724371j)	-26.3516	0.0481307	-78.9834	-1.37852	(0.0208934-0.04430401j)	-26.199	0.0489835	-64.7518	-1.13013	(0.01557766-0.03605065j)	-28.1183	0.0392723	-66.6306	-1.16292	(-0.007668528-0.05291079j)	-25.4388	0.0534636	-98.2466	-1.71473	(-0.002428747-0.06394921j)	-23.877	0.0639953	-92.175
5.3285	(0.01993285-0.06160189j)	-23.7757	0.0647465	-72.0697	-1.25785	(0.001504661-0.05706979j)	-24.8689	0.0570896	-88.4897	-1.54444	(0.01286651-0.05030889j)	-25.6919	0.0519281	-75.6541	-1.32041	(0.02797886-0.05485817j)	-24.211	0.0615811	-62.9774	-1.09916	(0.01091874-0.05998458j)	-24.2976	0.0609702	-79.6836	-1.39074	(0.008500453-0.04381814j)	-27.0065	0.044635	-79.0213	-1.37918	(0.02074104-0.04234823j)	-26.5295	0.0471547	-63.9056	-1.11536	(0.01494584-0.03186198j)	-29.0708	0.0351932	-64.8696	-1.13219	(-0.008082977-0.04896787j)	-26.085	0.0496305	-99.3731	-1.73439	(-0.002144487-0.06150007j)	-24.2172	0.0615374	-91.9971
5.329	(0.01949681-0.05983809j)	-24.0223	0.0629343	-71.953	-1.25582	(0.002557499-0.05267224j)	-25.5581	0.0527343	-87.2202	-1.52228	(0.01305751-0.04581381j)	-26.4409	0.0476383	-74.0918	-1.29315	(0.02791216-0.0519367j)	-24.5886	0.0589619	-61.7452	-1.07766	(0.01095892-0.05612326j)	-24.8546	0.0571832	-78.9512	-1.37796	(0.00854508-0.04056142j)	-27.6491	0.0414517	-78.1035	-1.36316	(0.02094056-0.03904455j)	-27.0708	0.0443056	-61.7942	-1.07851	(0.01621271-0.02851565j)	-29.6819	0.0328024	-60.3794	-1.05382	(-0.008138666-0.04575887j)	-26.6552	0.046477	-100.085	-1.74682	(-0.001818817-0.05743037j)	-24.8128	0.0574592	-91.8139
5.3295	(0.02038509-0.05543245j)	-24.5739	0.0590619	-69.8092	-1.2184	(0.002871237-0.05085216j)	-25.86	0.0509332	-86.7684	-1.51439	(0.01528762-0.04320409j)	-26.7772	0.0458291	-70.5138	-1.2307	(0.02916856-0.04849618j)	-24.9449	0.0565923	-58.9747	-1.0293	(0.01127405-0.05337596j)	-25.2635	0.0545536	-78.0733	-1.36264	(0.009611162-0.03738652j)	-28.2678	0.0386022	-75.5828	-1.31917	(0.02149954-0.03616428j)	-27.5201	0.0420724	-59.2687	-1.03443	(0.01657061-0.02551713j)	-30.3353	0.0304255	-57.0006	-0.994849	(-0.005763326-0.04229439j)	-27.3944	0.0426853	-97.7597	-1.70623	(-0.001631347-0.05416809j)	-25.3212	0.0541926	-91.725
5.33	(0.01912695-0.05290155j)	-24.9971	0.0562531	-70.1222	-1.22386	(0.001743793-0.04663632j)	-26.6194	0.0466689	-87.8586	-1.53342	(0.01350659-0.03960392j)	-27.5674	0.0418437	-71.1685	-1.24212	(0.02846609-0.04631003j)	-25.2945	0.0543593	-58.4216	-1.01965	(0.009776747-0.05051147j)	-25.7725	0.0514489	-79.0456	-1.37961	(0.008127126-0.0343048j)	-29.0557	0.0352544	-76.6718	-1.33818	(0.02095618-0.03261812j)	-28.2301	0.0387699	-57.2805	-0.999732	(0.01639871-0.02422779j)	-30.6758	0.0292558	-55.9077	-0.975773	(-0.007323523-0.03902215j)	-28.0234	0.0397034	-100.629	-1.75631	(-0.003070437-0.05032906j)	-25.9475	0.0504226	-93.4911
5.3305	(0.01856348-0.04910328j)	-25.5976	0.0524951	-69.2909	-1.20935	(0.001311474-0.04250711j)	-27.4266	0.0425273	-88.2328	-1.53995	(0.013379-0.03605942j)	-28.2995	0.0384614	-69.6438	-1.21551	(0.02711051-0.0418705j)	-26.0413	0.049881	-57.0776	-0.996191	(0.01004537-0.04605468j)	-26.5327	0.0471375	-77.6955	-1.35604	(0.00768701-0.02960505j)	-30.2893	0.0305867	-75.4445	-1.31675	(0.02186925-0.02888224j)	-28.8192	0.0362277	-52.8675	-0.922712	(0.01538627-0.01966502j)	-32.052	0.024969	-51.9597	-0.906868	(-0.00822535-0.03417731j)	-29.0807	0.0351532	-103.532	-1.80697	(-0.00378965-0.04671628j)	-26.5821	0.0468697	-94.6377
5.331	(0.0173259-0.04581416j)	-26.1995	0.0489809	-69.2845	-1.20924	(0.001458666-0.03903762j)	-28.1643	0.0390649	-87.8601	-1.53345	(0.01221803-0.03269523j)	-29.1426	0.0349036	-69.5096	-1.21317	(0.02663143-0.03846182j)	-26.5984	0.0467819	-55.3008	-0.965181	(0.007958527-0.0422692j)	-27.3282	0.0430119	-79.3371	-1.38469	(0.00731778-0.02737992j)	-30.9517	0.028341	-75.0364	-1.30963	(0.0193101-0.02516506j)	-29.9733	0.03172	-52.4996	-0.916291	(0.01570589-0.01572674j)	-33.0627	0.0222262	-45.038	-0.786061	(-0.008784009-0.03166551j)	-29.6663	0.0328613	-105.504	-1.84139	(-0.004895442-0.04295483j)	-27.2837	0.0432329	-96.5018
5.3315	(0.01626423-0.04230003j)	-26.8744	0.0453191	-68.9684	-1.20373	(-0.0005341310999999998-0.03662988j)	-28.7224	0.0366338	-90.8354	-1.58538	(0.01068219-0.02988387j)	-29.969	0.0317357	-70.3302	-1.22749	(0.02559943-0.03615486j)	-27.0719	0.0443002	-54.6996	-0.954688	(0.007300879-0.03989218j)	-27.8392	0.0405548	-79.6288	-1.38978	(0.005874244-0.02435049j)	-32.0242	0.025049	-76.4373	-1.33408	(0.01946762-0.02324604j)	-30.3651	0.0303211	-50.0552	-0.873628	(0.01449979-0.01306597j)	-34.1912	0.0195183	-42.0225	-0.73343	(-0.01089634-0.02919543j)	-30.1273	0.0311625	-110.467	-1.92801	(-0.005475572-0.04058236j)	-27.7549	0.0409501	-97.6842
5.332	(0.01614167-0.03970284j)	-27.3592	0.0428587	-67.8752	-1.18465	(-0.002173166-0.03272427j)	-29.6835	0.0327963	-93.7993	-1.63711	(0.01005795-0.02646224j)	-30.9614	0.0283092	-69.1889	-1.20757	(0.02405485-0.03408397j)	-27.5936	0.0417175	-54.7874	-0.95622	(0.00555676-0.0362015j)	-28.7243	0.0366255	-81.2735	-1.41849	(0.004652529-0.02103225j)	-33.3348	0.0215407	-77.5265	-1.35309	(0.01792199-0.01956159j)	-31.5252	0.0265302	-47.5046	-0.829112	(0.01344907-0.009438885j)	-35.6868	0.0164308	-35.0621	-0.611949	(-0.01137625-0.0241522j)	-31.4706	0.0266973	-115.222	-2.011	(-0.006977911-0.03701345j)	-28.4811	0.0376655	-100.676
5.3325	(0.01381249-0.0367982j)	-28.111	0.0393051	-69.426	-1.21171	(-0.003053174-0.0300308j)	-30.404	0.0301856	-95.8052	-1.67212	(0.009182618-0.0238624j)	-31.846	0.0255682	-68.9525	-1.20345	(0.02277694-0.03054465j)	-28.381	0.038102	-53.2884	-0.930057	(0.004212806-0.03330648j)	-29.4805	0.0335719	-82.7912	-1.44498	(0.004550372-0.01828741j)	-34.4961	0.018845	-76.0271	-1.32692	(0.01735401-0.01710008j)	-32.2652	0.0243634	-44.5777	-0.778028	(0.0128812-0.007214788j)	-36.6159	0.0147641	-29.2533	-0.510566	(-0.01199896-0.02191563j)	-32.0463	0.0249854	-118.701	-2.07172	(-0.007578786-0.03454654j)	-29.0278	0.0353681	-102.373
5.333	(0.009892345-0.03363836j)	-29.1031	0.0350628	-73.6125	-1.28478	(-0.006838626-0.02672774j)	-31.1854	0.0275887	-104.352	-1.82128	(0.006449525-0.02051895j)	-33.3477	0.0215087	-72.551	-1.26625	(0.01923887-0.0280476j)	-29.3674	0.0340118	-55.5524	-0.969572	(0.00033160850000000033-0.03016162j)	-30.4104	0.0301634	-89.3701	-1.5598	(0.0008872002-0.01439445j)	-36.8196	0.0144218	-86.473	-1.50924	(0.01351345-0.01295798j)	-34.5528	0.0187222	-43.7979	-0.764417	(0.009959074-0.004387999j)	-39.2651	0.0108829	-23.7784	-0.415012	(-0.01550965-0.01733061j)	-32.6688	0.0232572	-131.826	-2.3008	(-0.01207492-0.0295485j)	-29.9186	0.0319205	-112.227
5.3335	(0.008738909-0.03090923j)	-29.8643	0.0321209	-74.2129	-1.29526	(-0.008285786-0.02393198j)	-31.9288	0.0253258	-109.097	-1.9041	(0.004183965-0.01831037j)	-34.525	0.0187823	-77.1288	-1.34615	(0.01670195-0.02470992j)	-30.5084	0.0298251	-55.9444	-0.976414	(-0.001519061-0.02763158j)	-31.1588	0.0276733	-93.1467	-1.62572	(-0.002141832-0.01213614j)	-38.1852	0.0123237	-100.009	-1.74548	(0.01182597-0.01211461j)	-35.427	0.0169298	-45.6908	-0.797454	(0.007352661-0.0014105339999999997j)	-42.5141	0.00748674	-10.8597	-0.189537	(-0.01846898-0.01477435j)	-32.5229	0.0236513	-141.342	-2.46688	(-0.01365099-0.02783232j)	-30.1728	0.0309998	-116.127
5.334	(0.005580368-0.02829161j)	-30.8011	0.0288367	-78.8419	-1.37605	(-0.009546411-0.02065735j)	-32.8579	0.0227565	-114.803	-2.00369	(0.001752236-0.01645575j)	-35.6247	0.0165488	-83.922	-1.46471	(0.01529083-0.02358698j)	-31.0229	0.0281097	-57.0457	-0.995635	(-0.002477803-0.02572743j)	-31.752	0.0258465	-95.5012	-1.66681	(-0.002467614-0.009904025j)	-39.8222	0.0102068	-103.991	-1.81498	(0.01029429-0.009283775j)	-37.1634	0.0138622	-42.0453	-0.733829	(0.006086437+0.0008177318j)	-44.235	0.00614112	7.65204	0.133553	(-0.01999552-0.01238747j)	-32.5706	0.0235217	-148.221	-2.58695	(-0.01546294-0.02454091j)	-30.7502	0.0290062	-122.215
5.3345	(0.002973948-0.02673256j)	-31.4058	0.0268975	-83.6521	-1.46	(-0.01340056-0.01860339j)	-32.7929	0.0229273	-125.766	-2.19504	(-0.002039016-0.0137259j)	-37.1544	0.0138765	-98.4496	-1.71827	(0.0123249-0.02071909j)	-32.3569	0.0241078	-59.2534	-1.03417	(-0.006393452000000001-0.02321291j)	-32.3679	0.0240773	-105.399	-1.83956	(-0.005908308-0.00745015j)	-40.4377	0.00950857	-128.416	-2.24128	(0.007279064-0.008128243j)	-39.2426	0.0109111	-48.1547	-0.840458	(0.003518631+0.0029033639999999994j)	-46.8172	0.00456183	39.5274	0.689883	(-0.02218377-0.009581407j)	-32.3364	0.0241645	-156.64	-2.73388	(-0.01836929-0.02154963j)	-30.9592	0.0283164	-130.445
5.335	(0.00033270170000000016-0.02333065j)	-32.6406	0.023333	-89.183	-1.55654	(-0.01535271-0.01635026j)	-32.984	0.0224285	-133.198	-2.32474	(-0.003415661-0.0112369j)	-38.6033	0.0117446	-106.908	-1.86589	(0.009627435-0.01859109j)	-33.5821	0.020936	-62.6225	-1.09297	(-0.008961685-0.02002735j)	-33.1749	0.021941	-114.107	-1.99155	(-0.008011264-0.004542523j)	-40.7153	0.0092095	-150.446	-2.62578	(0.005541754-0.005811381j)	-41.9055	0.00803014	-46.3605	-0.809143	(0.0006331331999999998+0.005835344j)	-44.6278	0.00586959	83.8076	1.46272	(-0.02539272-0.007471922j)	-31.5452	0.0264692	-163.603	-2.85542	(-0.0212901-0.01976875j)	-30.7362	0.0290529	-137.122
5.3355	(-0.002089743-0.02165202j)	-33.2498	0.0217526	-95.5128	-1.66701	(-0.0190117-0.01279676j)	-32.7967	0.0229173	-146.056	-2.54915	(-0.005758779-0.008416583j)	-39.8296	0.0101982	-124.381	-2.17085	(0.006646049-0.0165728j)	-34.9644	0.0178557	-68.1482	-1.18941	(-0.01203915-0.01891268j)	-32.9875	0.0224194	-122.479	-2.13767	(-0.01172724-0.002356628j)	-38.4442	0.0119617	-168.638	-2.94328	(0.0017803409999999995-0.002938962j)	-49.2786	0.00343615	-58.7937	-1.02614	(-0.002069319+0.007188719j)	-42.5212	0.00748063	106.059	1.85108	(-0.02698909-0.004891191j)	-31.2359	0.0274287	-169.728	-2.96231	(-0.02226765-0.01692141j)	-31.0669	0.0279675	-142.768
5.336	(-0.005312004-0.01907958j)	-34.0644	0.0198052	-105.558	-1.84233	(-0.02243176-0.01216685j)	-31.8627	0.0255189	-151.525	-2.64461	(-0.01036926-0.006560618j)	-38.2228	0.0122704	-147.679	-2.57748	(0.00264511-0.0146748j)	-36.5297	0.0149113	-79.7822	-1.39246	(-0.01498791-0.01552933j)	-33.318	0.0215823	-133.984	-2.33845	(-0.0138609-0.0009261732j)	-37.1448	0.0138918	-176.177	-3.07487	(-0.001148455-0.0002685659j)	-58.5665	0.00117944	-166.838	-2.91187	(-0.00546068+0.01008092j)	-38.8126	0.0114649	118.444	2.06723	(-0.03055504-0.0017693559999999997j)	-30.2838	0.0306062	-176.686	-3.08375	(-0.02740866-0.01528224j)	-30.0666	0.0313812	-150.857
5.3365	(-0.009236474-0.01786974j)	-33.9293	0.0201157	-117.333	-2.04785	(-0.02426716-0.009500078j)	-31.6804	0.0260604	-158.621	-2.76845	(-0.01349699-0.00516079j)	-36.8026	0.01445	-159.075	-2.77638	(-0.000308928-0.01289055j)	-37.7921	0.0128943	-91.3729	-1.59476	(-0.01720602-0.01368717j)	-33.1571	0.021986	-141.498	-2.46961	(-0.01824092+0.0013039679999999998j)	-34.7569	0.0182875	175.911	3.07023	(-0.004739266+0.0017097190000000002j)	-45.9544	0.00503823	160.163	2.79537	(-0.008093293+0.01230833j)	-36.6355	0.0147308	123.327	2.15246	(-0.03377301+9.679086000000006e-05j)	-29.4286	0.0337731	179.836	3.13873	(-0.03057099-0.01245112j)	-29.6273	0.0330093	-157.84
5.337	(-0.01308132-0.01615023j)	-33.6457	0.0207834	-129.007	-2.25159	(-0.02813969-0.008516404j)	-30.633	0.0294002	-163.162	-2.84771	(-0.016507-0.003053562j)	-35.5005	0.0167871	-169.52	-2.95867	(-0.003168539-0.01199636j)	-38.1261	0.0124078	-104.795	-1.82902	(-0.02199408-0.01224113j)	-31.982	0.0251711	-150.901	-2.63372	(-0.02030914+0.002554465j)	-33.778	0.0204692	172.831	3.01647	(-0.008322004+0.002097233j)	-41.328	0.0085822	165.855	2.89472	(-0.01105898+0.01280097j)	-35.4338	0.0169164	130.824	2.28331	(-0.03793576+0.0010507929999999997j)	-28.4157	0.0379503	178.413	3.1139	(-0.0343826-0.01193512j)	-28.7791	0.0363952	-160.857
5.3375	(-0.01655297-0.01694905j)	-32.5083	0.0236912	-134.323	-2.34437	(-0.03204376-0.006990065j)	-29.6832	0.0327973	-167.694	-2.92682	(-0.01980313-0.003238895j)	-33.9507	0.0200663	-170.711	-2.97947	(-0.006072245-0.01186141j)	-37.5064	0.0133254	-117.109	-2.04394	(-0.02466284-0.01252508j)	-31.1626	0.027661	-153.076	-2.67168	(-0.02327112+0.003069642j)	-32.5887	0.0234727	172.486	3.01044	(-0.01104071+0.003482353j)	-38.7282	0.0115769	162.494	2.83606	(-0.01340669+0.01324704j)	-34.495	0.0188474	135.343	2.36218	(-0.03908002+0.001331395j)	-28.1559	0.0391027	178.049	3.10754	(-0.03708596-0.01084117j)	-28.2597	0.0386381	-163.705
5.338	(-0.02116805-0.01460808j)	-31.7948	0.0257193	-145.39	-2.53754	(-0.03592608-0.006475121j)	-28.753	0.0365049	-169.783	-2.96327	(-0.02359126-0.002163635j)	-32.5086	0.0236903	-174.76	-3.05014	(-0.009412895-0.01016529j)	-37.1684	0.0138541	-132.799	-2.31778	(-0.02890631-0.01108858j)	-30.1839	0.0309602	-159.013	-2.7753	(-0.0263958+0.004701158j)	-31.4337	0.0268112	169.901	2.96534	(-0.01315662+0.003445894j)	-37.329	0.0136004	165.323	2.88543	(-0.01667687+0.01485915j)	-33.0198	0.0223363	138.299	2.41377	(-0.04319863+0.003151065j)	-27.2676	0.0433134	175.828	3.06878	(-0.04152074-0.00896152j)	-27.437	0.0424768	-167.821
5.3385	(-0.02266311-0.01445019j)	-31.4121	0.026878	-147.478	-2.57398	(-0.03827713-0.005279622j)	-28.2594	0.0386395	-172.147	-3.00453	(-0.0267921-0.00103523j)	-31.4334	0.0268121	-177.787	-3.10297	(-0.01317648-0.01005185j)	-35.6121	0.0165728	-142.661	-2.48991	(-0.03187417-0.01083153j)	-29.4566	0.0336643	-161.231	-2.81401	(-0.02967619+0.004804306j)	-30.4395	0.0300626	170.804	2.98109	(-0.01802037+0.004562901j)	-34.6148	0.0185891	165.791	2.8936	(-0.01953367+0.01467195j)	-32.2415	0.0244301	143.089	2.49738	(-0.04658489+0.004238139j)	-26.5993	0.0467773	174.802	3.05087	(-0.04524172-0.009311106j)	-26.7091	0.0461899	-168.37
5.339	(-0.026776-0.01355313j)	-30.4545	0.0300107	-153.153	-2.67302	(-0.04126518-0.004134909j)	-27.6449	0.0414718	-174.278	-3.04172	(-0.02974103+0.00031796100000000007j)	-30.5324	0.0297427	179.387	3.1309	(-0.01686711-0.008649083j)	-34.4454	0.0189554	-152.852	-2.66777	(-0.0343561-0.008840775j)	-29.0015	0.0354754	-165.569	-2.88973	(-0.03348594+0.006749857j)	-29.3298	0.0341595	168.603	2.94269	(-0.02004828+0.005861179j)	-33.6023	0.0208875	163.704	2.85717	(-0.02285886+0.01620541j)	-31.0505	0.0280204	144.666	2.5249	(-0.04962931+0.00497623j)	-26.0418	0.0498782	174.274	3.04166	(-0.0471132-0.007360945j)	-26.4324	0.0476848	-171.12
5.3395	(-0.03062979-0.01355668j)	-29.5002	0.0334958	-156.126	-2.72491	(-0.04496187-0.004422812j)	-26.9013	0.0451789	-174.382	-3.04354	(-0.03377385+0.0002715206j)	-29.4281	0.0337749	179.539	3.13355	(-0.02023867-0.009636945j)	-32.9889	0.0224159	-154.538	-2.69719	(-0.03866266-0.00887752j)	-28.031	0.0396688	-167.068	-2.91589	(-0.03624787+0.00731845j)	-28.6408	0.0369793	168.585	2.94237	(-0.02452734+0.004359601j)	-32.0719	0.0249118	169.921	2.96569	(-0.02663638+0.01498799j)	-30.2959	0.0305636	150.634	2.62906	(-0.05353061+0.005090962j)	-25.3889	0.0537721	174.567	3.04677	(-0.05098685-0.00694356j)	-25.771	0.0514575	-172.245
5.34	(-0.03406586-0.0134199j)	-28.7271	0.0366139	-158.499	-2.76632	(-0.04898515-0.004331903j)	-26.1649	0.0491763	-174.946	-3.05339	(-0.03761281-0.0003500360000000001j)	-28.4929	0.0376144	-179.467	-3.13229	(-0.0248711-0.009931973j)	-31.4435	0.0267809	-158.231	-2.76166	(-0.04246717-0.00903853j)	-27.2465	0.0434184	-167.985	-2.93189	(-0.0409993+0.005263961j)	-27.6735	0.0413358	172.684	3.0139	(-0.02751168+0.005016854j)	-31.0676	0.0279654	169.665	2.96122	(-0.03079839+0.01545367j)	-29.2542	0.034458	153.354	2.67653	(-0.05677966+0.005321891j)	-24.8782	0.0570285	174.645	3.04814	(-0.05502131-0.006250244j)	-25.1337	0.0553752	-173.519
5.3405	(-0.03676279-0.01380846j)	-28.1187	0.0392706	-159.413	-2.78229	(-0.05084052-0.005349062j)	-25.828	0.0511211	-173.994	-3.03677	(-0.04013778-0.001501151j)	-27.9229	0.0401658	-177.858	-3.10421	(-0.02740744-0.009456325j)	-30.7542	0.0289929	-160.964	-2.80935	(-0.04591984-0.01007989j)	-26.5556	0.0470131	-167.619	-2.92551	(-0.04230363+0.00533169j)	-27.404	0.0426383	172.817	3.01622	(-0.0304393+0.004269015j)	-30.2467	0.0307372	172.017	3.00225	(-0.0331033+0.01477089j)	-28.814	0.0362492	155.953	2.7219	(-0.05918996+0.005105357j)	-24.5228	0.0594097	175.07	3.05555	(-0.0580906-0.006024143j)	-24.6714	0.0584021	-174.079
5.341	(-0.04089375-0.01451206j)	-27.2517	0.0433924	-160.462	-2.80058	(-0.05565511-0.004222529j)	-25.065	0.0558151	-175.661	-3.06587	(-0.04354-0.001929754j)	-27.2137	0.0435827	-177.462	-3.0973	(-0.03035398-0.01108126j)	-29.8123	0.0323134	-159.944	-2.79156	(-0.04873097-0.009823863j)	-26.0709	0.0497113	-168.602	-2.94267	(-0.04596052+0.006295073j)	-26.6716	0.0463896	172.201	3.00547	(-0.03390462+0.004687473j)	-29.3126	0.0342271	172.128	3.00421	(-0.03568805+0.0154757j)	-28.2012	0.038899	156.557	2.73243	(-0.06283724+0.006036168j)	-23.9958	0.0631265	174.513	3.04583	(-0.06122285-0.006694701j)	-24.2101	0.0615878	-173.76
5.3415	(-0.04499384-0.01504031j)	-26.4769	0.0474411	-161.517	-2.81899	(-0.05869556-0.004653124j)	-24.6007	0.0588797	-175.467	-3.06248	(-0.04653025-0.002380025j)	-26.6339	0.0465911	-177.072	-3.09049	(-0.03394961-0.01166198j)	-28.8989	0.0358968	-161.042	-2.81071	(-0.05236325-0.01067964j)	-25.4425	0.0534412	-168.472	-2.9404	(-0.05014897+0.004755701j)	-25.9559	0.050374	174.583	3.04704	(-0.03688303+0.001462493j)	-28.6566	0.036912	177.729	3.10196	(-0.03903076+0.01387441j)	-27.6551	0.0414234	160.431	2.80005	(-0.06645798+0.004709339j)	-23.5273	0.0666246	175.947	3.07085	(-0.06572699-0.008645316j)	-23.5706	0.0662931	-172.507
5.342	(-0.04772037-0.0162783j)	-25.9479	0.0504204	-161.165	-2.81285	(-0.06303338-0.005461858j)	-23.9761	0.0632696	-175.048	-3.05516	(-0.04891185-0.003404879j)	-26.1907	0.0490302	-176.018	-3.07209	(-0.03699629-0.01178868j)	-28.2169	0.0388291	-162.326	-2.83312	(-0.05542044-0.01159683j)	-24.9405	0.0566208	-168.181	-2.93532	(-0.0523463+0.003296039j)	-25.6051	0.05245	176.397	3.07871	(-0.03990966+0.002263733j)	-27.9645	0.0399738	176.754	3.08493	(-0.04155032+0.0128884j)	-27.2295	0.0435033	162.767	2.84082	(-0.06925411+0.003632067j)	-23.1792	0.0693493	176.998	3.0892	(-0.06843167-0.009006932j)	-23.2203	0.0690219	-172.502
5.3425	(-0.04994332-0.01845637j)	-25.4745	0.0532445	-159.718	-2.78761	(-0.06479201-0.007533969j)	-23.7112	0.0652286	-173.367	-3.02583	(-0.0530043-0.004278529j)	-25.4856	0.0531767	-175.385	-3.06105	(-0.04049225-0.01366672j)	-27.384	0.0427364	-161.35	-2.81608	(-0.05842313-0.01244429j)	-24.4756	0.0597338	-167.976	-2.93173	(-0.05561664+0.001763105j)	-25.0915	0.0556446	178.184	3.1099	(-0.04242898+0.0006756824000000001j)	-27.4456	0.0424344	179.088	3.12567	(-0.04426969+0.01092415j)	-26.8212	0.0455976	166.138	2.89966	(-0.07202305+0.002522494j)	-22.8452	0.0720672	177.994	3.10658	(-0.07141417-0.009995197j)	-22.8401	0.0721102	-172.033
5.343	(-0.05399491-0.01916445j)	-24.8377	0.0572951	-160.459	-2.80053	(-0.06703157-0.00901462j)	-23.3966	0.067635	-172.341	-3.00791	(-0.05546046-0.00614086j)	-25.0674	0.0557994	-173.682	-3.03132	(-0.04283439-0.01649332j)	-26.7637	0.0459	-158.941	-2.77404	(-0.06091727-0.01377544j)	-24.0886	0.0624554	-167.258	-2.9192	(-0.05840547-0.0005195911999999999j)	-24.6706	0.0584078	-179.49	-3.1327	(-0.04472972-0.001336345j)	-26.9842	0.0447497	-178.289	-3.11173	(-0.04797075+0.00942577j)	-26.216	0.048888	168.884	2.94757	(-0.07510962+0.001486318j)	-22.4844	0.0751243	178.866	3.12181	(-0.07393198-0.01178349j)	-22.5144	0.0748651	-170.944
5.3435	(-0.05560159-0.02185665j)	-24.4742	0.0597432	-158.541	-2.76705	(-0.07031884-0.01086997j)	-22.956	0.071154	-171.213	-2.98823	(-0.05689585-0.007780729j)	-24.8179	0.0574254	-172.213	-3.00568	(-0.04634946-0.01878986j)	-26.0183	0.0500133	-157.933	-2.75644	(-0.06366566-0.01536433j)	-23.6761	0.0654934	-166.432	-2.90479	(-0.06063076-0.0006735716j)	-24.3456	0.0606345	-179.364	-3.13048	(-0.04767077-0.00315147j)	-26.416	0.0477748	-176.218	-3.07558	(-0.04976546+0.007583286j)	-25.9618	0.0503399	171.336	2.99038	(-0.07711853-0.0013757260000000003j)	-22.2554	0.0771308	-178.978	-3.12376	(-0.07602263-0.01291182j)	-22.2576	0.0771113	-170.361
5.344	(-0.05878016-0.02425451j)	-23.9325	0.0635876	-157.577	-2.75025	(-0.07266714-0.01128839j)	-22.6697	0.0735387	-171.17	-2.98748	(-0.06036048-0.009894343j)	-24.2698	0.061166	-170.691	-2.97912	(-0.04720579-0.02072022j)	-25.7549	0.051553	-156.302	-2.72798	(-0.06681035-0.01751916j)	-23.2143	0.0690691	-165.307	-2.88514	(-0.06232117-0.004114864j)	-24.0884	0.0624569	-176.222	-3.07566	(-0.04999483-0.006066222j)	-25.958	0.0503615	-173.082	-3.02085	(-0.05171103+0.004864497j)	-25.6901	0.0519393	174.626	3.0478	(-0.07959174-0.002256236j)	-21.9792	0.0796237	-178.376	-3.11325	(-0.07896069-0.0154971j)	-21.8876	0.0804671	-168.896
5.3445	(-0.06210188-0.02516627j)	-23.4776	0.0670073	-157.94	-2.75658	(-0.07491559-0.01258015j)	-22.3878	0.0759645	-170.468	-2.97522	(-0.06121176-0.01139299j)	-24.1154	0.062263	-169.457	-2.95757	(-0.05026377-0.02175434j)	-25.2292	0.0547695	-156.597	-2.73313	(-0.06829421-0.01871045j)	-22.998	0.0708109	-164.679	-2.87419	(-0.0656172-0.003886864j)	-23.6444	0.0657322	-176.61	-3.08243	(-0.05206206-0.006385804j)	-25.6047	0.0524522	-173.007	-3.01954	(-0.05408273+0.004187666j)	-25.3129	0.0542446	175.572	3.06432	(-0.08109917-0.003156653j)	-21.8131	0.0811606	-177.771	-3.10269	(-0.08081394-0.01533534j)	-21.6966	0.0822561	-169.255
5.345	(-0.06293683-0.02790049j)	-23.2427	0.0688439	-156.092	-2.72432	(-0.07731716-0.01557074j)	-22.0618	0.0788695	-168.614	-2.94286	(-0.06494145-0.01401982j)	-23.5517	0.0664375	-167.818	-2.92897	(-0.05305668-0.02407994j)	-24.6918	0.0582654	-155.589	-2.71554	(-0.07118192-0.02191086j)	-22.5595	0.0744779	-162.891	-2.84298	(-0.06643721-0.005837095j)	-23.5184	0.0666931	-174.979	-3.05396	(-0.05447381-0.009585577j)	-25.1438	0.0553108	-170.02	-2.96741	(-0.0564476+0.001997337j)	-24.9617	0.0564829	177.973	3.10622	(-0.08374834-0.005337992j)	-21.5229	0.0839183	-176.353	-3.07794	(-0.08371646-0.01752277j)	-21.3576	0.0855307	-168.178
5.3455	(-0.06485261-0.02965027j)	-22.9371	0.0713092	-155.43	-2.71277	(-0.07739417-0.01787329j)	-22.0002	0.0794312	-166.996	-2.91463	(-0.0663396-0.01626306j)	-23.3111	0.068304	-166.226	-2.90119	(-0.0545876-0.02735949j)	-24.2848	0.0610602	-153.38	-2.67698	(-0.07288883-0.02265992j)	-22.3461	0.0763299	-162.73	-2.84018	(-0.06756216-0.009078198j)	-23.3282	0.0681693	-172.347	-3.00802	(-0.05597658-0.01246401j)	-24.8297	0.0573474	-167.447	-2.9225	(-0.05645068-0.001098773j)	-24.965	0.0564614	-178.885	-3.12213	(-0.08495019-0.007565393j)	-21.3824	0.0852864	-174.911	-3.05277	(-0.0840043-0.02098504j)	-21.2511	0.0865858	-165.974
5.346	(-0.06667121-0.03260136j)	-22.5901	0.0742152	-153.942	-2.68679	(-0.08031558-0.02043319j)	-21.6316	0.082874	-165.726	-2.89247	(-0.06702674-0.01931049j)	-23.1287	0.069753	-163.928	-2.86109	(-0.05638963-0.03034187j)	-23.8717	0.0640345	-151.716	-2.64795	(-0.07439689-0.02738122j)	-22.0172	0.0792756	-159.794	-2.78894	(-0.07045548-0.01208205j)	-22.9158	0.0714839	-170.269	-2.97176	(-0.05793943-0.01488894j)	-24.4628	0.0598219	-165.588	-2.89006	(-0.05904472-0.004654639j)	-24.5495	0.0592279	-175.493	-3.06292	(-0.08692058-0.009730797j)	-21.1635	0.0874636	-173.612	-3.03011	(-0.08694682-0.02296828j)	-20.922	0.0899294	-165.203
5.3465	(-0.06967595-0.03393592j)	-22.2139	0.0775009	-154.031	-2.68836	(-0.08158071-0.02194522j)	-21.4648	0.0844808	-164.944	-2.87881	(-0.06954455-0.02022282j)	-22.8022	0.0724252	-163.786	-2.85861	(-0.05910762-0.03099698j)	-23.512	0.0667422	-152.327	-2.6586	(-0.07661171-0.02792018j)	-21.7725	0.0815407	-159.976	-2.79211	(-0.07167306-0.01308949j)	-22.7504	0.0728585	-169.65	-2.96096	(-0.05958915-0.01698836j)	-24.1573	0.0619635	-164.088	-2.86387	(-0.06046709-0.005199056j)	-24.3376	0.0606902	-175.086	-3.05582	(-0.08847439-0.0121656j)	-20.9823	0.0893069	-172.171	-3.00495	(-0.08896051-0.02409663j)	-20.7086	0.0921663	-164.844
5.347	(-0.06932928-0.03691142j)	-22.0979	0.078543	-151.969	-2.65236	(-0.08327816-0.02414314j)	-21.2389	0.0867072	-163.833	-2.85942	(-0.07050684-0.02301944j)	-22.5955	0.0741695	-161.919	-2.82602	(-0.05906865-0.03367583j)	-23.3506	0.0679939	-150.312	-2.62344	(-0.07734586-0.03121405j)	-21.576	0.0834068	-158.023	-2.75802	(-0.07208733-0.01554888j)	-22.6453	0.0737452	-167.828	-2.92915	(-0.05990383-0.01897515j)	-24.0357	0.0628373	-162.424	-2.83483	(-0.06147641-0.009352854j)	-24.1265	0.0621838	-171.35	-2.99061	(-0.08881555-0.0133172j)	-20.9337	0.0898084	-171.472	-2.99276	(-0.08923472-0.02685469j)	-20.6128	0.093188	-163.251
5.3475	(-0.07090904-0.03939008j)	-21.818	0.0811152	-150.948	-2.63454	(-0.08353945-0.0257294j)	-21.1686	0.0874119	-162.882	-2.84282	(-0.07003893-0.02543319j)	-22.5553	0.0745137	-160.043	-2.79327	(-0.05896015-0.03717956j)	-23.1349	0.0697038	-147.765	-2.57899	(-0.07728013-0.03296182j)	-21.5128	0.0840161	-156.901	-2.73843	(-0.07256947-0.01862827j)	-22.5078	0.0749222	-165.603	-2.89032	(-0.06018656-0.0222935j)	-23.8516	0.0641827	-159.675	-2.78686	(-0.06056711-0.01205778j)	-24.1865	0.0617557	-168.741	-2.94508	(-0.08891597-0.01651686j)	-20.8731	0.090437	-169.477	-2.95793	(-0.09003833-0.02952593j)	-20.4679	0.0947559	-161.844
5.348	(-0.07199516-0.0412017j)	-21.6236	0.0829511	-150.218	-2.6218	(-0.08465036-0.02855105j)	-20.9795	0.0893356	-161.362	-2.81629	(-0.07229977-0.02700767j)	-22.25	0.0771795	-159.517	-2.78409	(-0.06050397-0.03837288j)	-22.8961	0.0716464	-147.616	-2.57639	(-0.07888422-0.03508327j)	-21.2764	0.086334	-156.023	-2.72312	(-0.07398944-0.02094248j)	-22.2819	0.0768962	-164.196	-2.86576	(-0.06190097-0.02529901j)	-23.4952	0.0668713	-157.77	-2.75361	(-0.0620854-0.01379382j)	-23.931	0.0635993	-167.474	-2.92297	(-0.09089018-0.01792765j)	-20.6639	0.0926414	-168.842	-2.94685	(-0.09229317-0.03042123j)	-20.2487	0.0971776	-161.757
5.3485	(-0.07200413-0.04541173j)	-21.3985	0.0851283	-147.761	-2.57892	(-0.08391948-0.03157813j)	-20.9476	0.0896641	-159.379	-2.78169	(-0.07068482-0.03102327j)	-22.2484	0.0771932	-156.304	-2.72801	(-0.05986643-0.04321575j)	-22.6348	0.0738349	-144.176	-2.51634	(-0.07747855-0.03916j)	-21.2283	0.0868126	-153.187	-2.67361	(-0.0729522-0.02515965j)	-22.2512	0.0771689	-160.972	-2.80949	(-0.06064848-0.02802024j)	-23.5034	0.0668085	-155.203	-2.7088	(-0.06162124-0.01840146j)	-23.8344	0.0643101	-163.373	-2.8514	(-0.09032327-0.02173571j)	-20.6395	0.0929017	-166.469	-2.90544	(-0.09094454-0.03451048j)	-20.2402	0.0972722	-159.22
5.349	(-0.07140281-0.04686361j)	-21.37	0.0854082	-146.722	-2.56078	(-0.08318172-0.03428042j)	-20.9182	0.0899686	-157.603	-2.75069	(-0.07145034-0.03335898j)	-22.0635	0.0788541	-154.973	-2.70479	(-0.06040753-0.0443982j)	-22.5024	0.0749685	-143.685	-2.50778	(-0.07897528-0.040166j)	-21.0511	0.0886025	-153.043	-2.6711	(-0.0722901-0.02553808j)	-22.3077	0.0766685	-160.543	-2.80201	(-0.06052736-0.03031612j)	-23.3889	0.0676951	-153.395	-2.67725	(-0.06058684-0.02007264j)	-23.9001	0.0638254	-161.67	-2.82167	(-0.08913945-0.0225797j)	-20.7285	0.0919548	-165.786	-2.8935	(-0.08991595-0.03522328j)	-20.3033	0.0965689	-158.608
5.3495	(-0.07257683-0.04984288j)	-21.106	0.0880438	-145.52	-2.53981	(-0.08422156-0.03642053j)	-20.747	0.0917591	-156.615	-2.73344	(-0.07215929-0.03590847j)	-21.8733	0.0806001	-153.544	-2.67984	(-0.06105954-0.04639667j)	-22.3055	0.0766871	-142.77	-2.49181	(-0.0793086-0.04378288j)	-20.8583	0.0905914	-151.099	-2.63717	(-0.07357716-0.02839345j)	-22.0622	0.0788656	-158.898	-2.7733	(-0.06187234-0.03347136j)	-23.0552	0.0703457	-151.588	-2.64571	(-0.0613851-0.02172877j)	-23.7261	0.0651174	-160.507	-2.80138	(-0.08965292-0.02581231j)	-20.6029	0.0932948	-163.938	-2.86126	(-0.09094471-0.0382897j)	-20.1157	0.0986764	-157.168
5.35	(-0.07172404-0.05087498j)	-21.1167	0.0879352	-144.651	-2.52464	(-0.08399267-0.03774591j)	-20.7163	0.0920843	-155.801	-2.71924	(-0.07121558-0.03807411j)	-21.8567	0.0807545	-151.87	-2.65062	(-0.06050858-0.05029652j)	-22.0824	0.0786831	-140.266	-2.4481	(-0.07810898-0.04387511j)	-20.955	0.0895882	-150.676	-2.6298	(-0.0729306-0.03079567j)	-22.0292	0.0791659	-157.108	-2.74205	(-0.06130303-0.03548003j)	-22.9957	0.07083	-149.939	-2.61693	(-0.05977023-0.02385319j)	-23.8285	0.0643541	-158.244	-2.76188	(-0.08921554-0.02697013j)	-20.6114	0.093203	-163.18	-2.84802	(-0.08975571-0.03920708j)	-20.1803	0.0979453	-156.403
5.3505	(-0.070917-0.05458004j)	-20.9646	0.0894886	-142.417	-2.48564	(-0.08322302-0.03978582j)	-20.7012	0.0922441	-154.449	-2.69565	(-0.06973854-0.04040179j)	-21.8737	0.0805963	-149.915	-2.61651	(-0.06065503-0.05258017j)	-21.9086	0.0802727	-139.079	-2.42738	(-0.07835099-0.04755972j)	-20.7568	0.0916559	-148.742	-2.59604	(-0.07197073-0.03390461j)	-21.9864	0.079557	-154.775	-2.70134	(-0.05974377-0.0380086j)	-22.9982	0.0708094	-147.536	-2.57498	(-0.05972758-0.02763495j)	-23.634	0.0658109	-155.171	-2.70824	(-0.08846763-0.02996185j)	-20.5927	0.0934036	-161.29	-2.81504	(-0.08935566-0.04291295j)	-20.0763	0.099126	-154.347
5.351	(-0.06999152-0.05521011j)	-20.998	0.0891458	-141.733	-2.47371	(-0.08223452-0.04183j)	-20.6995	0.0922619	-153.039	-2.67104	(-0.06847802-0.04267513j)	-21.8639	0.0806871	-148.069	-2.58429	(-0.05880636-0.05372734j)	-21.9758	0.0796543	-137.584	-2.4013	(-0.0765844-0.04823029j)	-20.8665	0.090506	-147.799	-2.57957	(-0.07112896-0.03434395j)	-22.049	0.0789863	-154.227	-2.69177	(-0.05811429-0.04024924j)	-23.0127	0.0706914	-145.294	-2.53586	(-0.05877559-0.02954347j)	-23.6377	0.0657829	-153.314	-2.67583	(-0.08804312-0.0305685j)	-20.6118	0.0931988	-160.853	-2.80742	(-0.08733627-0.04459673j)	-20.1698	0.0980637	-152.95
5.3515	(-0.06838219-0.05819385j)	-20.9352	0.0897922	-139.602	-2.43651	(-0.08117604-0.04461448j)	-20.6651	0.0926283	-151.207	-2.63906	(-0.06829971-0.04607655j)	-21.6826	0.0823887	-145.995	-2.5481	(-0.05801282-0.05783535j)	-21.7325	0.0819171	-135.088	-2.35773	(-0.07588232-0.05077556j)	-20.7903	0.0913033	-146.212	-2.55188	(-0.06889593-0.03824499j)	-22.0696	0.0787993	-150.965	-2.63483	(-0.05725747-0.04148987j)	-23.0105	0.0707095	-144.072	-2.51453	(-0.05659719-0.03162426j)	-23.7641	0.0648331	-150.805	-2.63205	(-0.08604416-0.033876j)	-20.6797	0.0924726	-158.51	-2.76652	(-0.08718063-0.04681314j)	-20.0913	0.0989542	-151.766
5.352	(-0.06760892-0.06014687j)	-20.8679	0.090491	-138.343	-2.41454	(-0.07779086-0.04676157j)	-20.8417	0.0907638	-148.989	-2.60035	(-0.06632428-0.04632135j)	-21.8412	0.0808986	-145.069	-2.53194	(-0.0561564-0.0586925j)	-21.8056	0.0812302	-133.735	-2.33412	(-0.07419972-0.0526995j)	-20.8182	0.0910101	-144.616	-2.52403	(-0.06644057-0.03970099j)	-22.2254	0.0773984	-149.14	-2.60298	(-0.05532347-0.04292508j)	-23.0952	0.0700232	-142.192	-2.48173	(-0.05559886-0.03325066j)	-23.7708	0.064783	-149.119	-2.60261	(-0.08369879-0.03386585j)	-20.8872	0.0902905	-157.971	-2.75711	(-0.08574671-0.04772349j)	-20.1637	0.0981327	-150.901
5.3525	(-0.06526291-0.06171072j)	-20.9326	0.089819	-136.602	-2.38416	(-0.07726926-0.04725173j)	-20.8601	0.0905719	-148.553	-2.59275	(-0.06471633-0.04848557j)	-21.8449	0.0808644	-143.159	-2.4986	(-0.05524595-0.06086285j)	-21.7028	0.0821973	-132.23	-2.30786	(-0.07128326-0.05526002j)	-20.8964	0.0901941	-142.217	-2.48215	(-0.06513897-0.04124132j)	-22.2593	0.0770969	-147.661	-2.57717	(-0.05442194-0.04585539j)	-22.9547	0.0711651	-139.883	-2.44142	(-0.05298384-0.035539j)	-23.9037	0.063799	-146.148	-2.55077	(-0.08243222-0.03646009j)	-20.9021	0.0901355	-156.14	-2.72516	(-0.08462197-0.04883356j)	-20.202	0.0977016	-150.012
5.353	(-0.06447718-0.06343563j)	-20.8717	0.090451	-135.467	-2.36434	(-0.07576567-0.0491143j)	-20.887	0.090292	-147.047	-2.56646	(-0.06328323-0.05012656j)	-21.8592	0.0807307	-141.617	-2.47169	(-0.05246615-0.06187644j)	-21.8168	0.0811258	-130.295	-2.27408	(-0.0717046-0.05627216j)	-20.805	0.0911488	-141.876	-2.4762	(-0.06364781-0.0424727j)	-22.3248	0.0765178	-146.284	-2.55315	(-0.05222179-0.04767775j)	-23.0101	0.0707127	-137.604	-2.40165	(-0.05178473-0.03570566j)	-24.0268	0.0629011	-145.414	-2.53795	(-0.08071925-0.03753439j)	-21.0103	0.0890193	-155.062	-2.70634	(-0.08263327-0.0514876j)	-20.2323	0.0973613	-148.074
5.3535	(-0.06265805-0.06410195j)	-20.9501	0.0896387	-134.347	-2.3448	(-0.07431246-0.04922873j)	-20.9986	0.0891393	-146.477	-2.55651	(-0.06053151-0.05026552j)	-22.0826	0.0786809	-140.294	-2.44859	(-0.05157385-0.06321066j)	-21.7682	0.0815809	-129.211	-2.25516	(-0.06942748-0.05651556j)	-20.9614	0.089522	-140.854	-2.45836	(-0.06321453-0.04190055j)	-22.402	0.0758402	-146.462	-2.55625	(-0.05121551-0.04781634j)	-23.0897	0.0700673	-136.966	-2.39051	(-0.04984325-0.03738314j)	-24.1096	0.0623045	-143.13	-2.49808	(-0.07809373-0.0377038j)	-21.2377	0.0867191	-154.229	-2.6918	(-0.08034488-0.04998168j)	-20.4801	0.0946228	-148.115
5.354	(-0.0607653-0.06594911j)	-20.9465	0.0896756	-132.657	-2.31531	(-0.07175902-0.05138227j)	-21.0849	0.0882581	-144.396	-2.52018	(-0.05919706-0.05169257j)	-22.0926	0.0785902	-138.872	-2.42377	(-0.04982708-0.06474961j)	-21.7553	0.0817022	-127.58	-2.22668	(-0.06780284-0.05922227j)	-20.9127	0.090025	-138.864	-2.42364	(-0.05976779-0.04446399j)	-22.5577	0.0744932	-143.353	-2.50198	(-0.04896651-0.05060668j)	-23.0463	0.0704184	-134.056	-2.33972	(-0.0476022-0.03916248j)	-24.2025	0.0616415	-140.556	-2.45316	(-0.07674533-0.03978627j)	-21.2652	0.0864453	-152.597	-2.66332	(-0.07906251-0.05189667j)	-20.4846	0.0945735	-146.719
5.3545	(-0.05812415-0.06718477j)	-21.028	0.0888381	-130.864	-2.28401	(-0.06950244-0.05227521j)	-21.2129	0.0869672	-143.052	-2.49673	(-0.05568185-0.05338141j)	-22.2548	0.0771365	-136.208	-2.37728	(-0.04765435-0.06577188j)	-21.8066	0.0812212	-125.925	-2.1978	(-0.06432372-0.0595931j)	-21.1414	0.0876863	-137.186	-2.39435	(-0.05786045-0.04580851j)	-22.639	0.0737987	-141.631	-2.47193	(-0.0460247-0.05215293j)	-23.1532	0.0695572	-131.428	-2.29386	(-0.04486892-0.04038655j)	-24.3839	0.060368	-138.01	-2.40872	(-0.07345136-0.04079206j)	-21.5125	0.0840184	-150.954	-2.63464	(-0.07649063-0.05311015j)	-20.6191	0.0931209	-145.226
5.355	(-0.05693157-0.06676894j)	-21.1355	0.0877456	-130.453	-2.27684	(-0.06737161-0.05240809j)	-21.3754	0.0853554	-142.121	-2.48048	(-0.05455068-0.05337735j)	-22.3471	0.0763212	-135.623	-2.36707	(-0.04607081-0.06575356j)	-21.9071	0.0802873	-125.017	-2.18196	(-0.06332868-0.05879333j)	-21.2684	0.0864128	-137.127	-2.39332	(-0.0555734-0.04456478j)	-22.9461	0.071235	-141.274	-2.46569	(-0.04353997-0.05058807j)	-23.5116	0.0667449	-130.718	-2.28146	(-0.04281173-0.04120966j)	-24.5209	0.0594229	-136.092	-2.37526	(-0.07072429-0.04043437j)	-21.7804	0.0814669	-150.243	-2.62223	(-0.0750083-0.05291931j)	-20.7434	0.0917971	-144.797
5.3555	(-0.05479177-0.06586825j)	-21.3426	0.0856783	-129.755	-2.26465	(-0.06549351-0.05173381j)	-21.5703	0.0834613	-141.695	-2.47304	(-0.05295772-0.05309549j)	-22.4998	0.074991	-134.926	-2.3549	(-0.04327295-0.06644938j)	-22.0148	0.0792973	-123.073	-2.14803	(-0.06124218-0.05930049j)	-21.3864	0.0852476	-135.923	-2.3723	(-0.05244964-0.04540507j)	-23.1762	0.0693728	-139.118	-2.42806	(-0.04129234-0.05205816j)	-23.5506	0.0664463	-128.421	-2.24137	(-0.03975437-0.04166582j)	-24.7933	0.0575886	-133.655	-2.33272	(-0.06962924-0.04039219j)	-21.8844	0.080497	-149.882	-2.61593	(-0.07176175-0.05321974j)	-20.9788	0.0893425	-143.439
5.356	(-0.05230525-0.06739647j)	-21.3798	0.0853119	-127.814	-2.23078	(-0.06224651-0.05230777j)	-21.7975	0.0813064	-139.959	-2.44274	(-0.04881886-0.05310685j)	-22.8369	0.0721361	-132.591	-2.31415	(-0.04220275-0.06727143j)	-22.0021	0.0794136	-122.102	-2.13108	(-0.05888532-0.05890649j)	-21.588	0.0832914	-134.99	-2.35601	(-0.04963797-0.04602523j)	-23.3892	0.0676923	-137.163	-2.39394	(-0.03992023-0.0514156j)	-23.7292	0.0650937	-127.827	-2.23099	(-0.03815882-0.04225636j)	-24.8923	0.0569359	-132.083	-2.30528	(-0.06719126-0.03991729j)	-22.141	0.078154	-149.286	-2.60553	(-0.07025451-0.05376792j)	-21.0642	0.0884686	-142.572
5.3565	(-0.0493446-0.06604074j)	-21.6773	0.0824395	-126.767	-2.21249	(-0.05987672-0.05091729j)	-22.0917	0.0785989	-139.623	-2.43688	(-0.04705491-0.05321538j)	-22.9705	0.0710355	-131.484	-2.29483	(-0.0391039-0.0674653j)	-22.1605	0.0779787	-120.097	-2.09609	(-0.055631-0.05892954j)	-21.826	0.0810401	-133.351	-2.32741	(-0.04759335-0.04528467j)	-23.6494	0.065695	-136.424	-2.38105	(-0.03661225-0.05186064j)	-23.947	0.0634821	-125.221	-2.18552	(-0.03506574-0.04149084j)	-25.3002	0.054324	-130.203	-2.27246	(-0.0640697-0.03939258j)	-22.4744	0.075211	-148.415	-2.59033	(-0.06590448-0.05285947j)	-21.4645	0.0844839	-141.268
5.357	(-0.04713445-0.06623675j)	-21.7987	0.0812955	-125.436	-2.18927	(-0.05731849-0.05124665j)	-22.2829	0.0768871	-138.201	-2.41206	(-0.04491116-0.05332632j)	-23.133	0.0697188	-130.104	-2.27074	(-0.03662001-0.06676225j)	-22.3671	0.0761461	-118.745	-2.0725	(-0.05362421-0.05862908j)	-21.9977	0.0794539	-132.447	-2.31164	(-0.04522565-0.04612159j)	-23.796	0.0645954	-134.438	-2.34639	(-0.03313151-0.052413j)	-24.1512	0.0620066	-122.298	-2.1345	(-0.03210565-0.04256232j)	-25.4633	0.0533134	-127.028	-2.21706	(-0.06079819-0.03979931j)	-22.7733	0.0726664	-146.791	-2.56198	(-0.06458692-0.05221837j)	-21.6126	0.0830556	-141.045
5.3575	(-0.0448235-0.06540296j)	-22.0158	0.0792887	-124.425	-2.17162	(-0.05400276-0.05078782j)	-22.5998	0.074133	-136.757	-2.38686	(-0.04102734-0.05193508j)	-23.5848	0.0661853	-128.308	-2.23939	(-0.03445961-0.06585802j)	-22.5769	0.0743286	-117.62	-2.05286	(-0.05118961-0.05684301j)	-22.3273	0.0764951	-132.004	-2.30391	(-0.0418275-0.04461097j)	-24.2717	0.0611529	-133.156	-2.324	(-0.03088192-0.05131683j)	-24.4526	0.0598925	-121.039	-2.11253	(-0.02830093-0.04083199j)	-26.0762	0.0496809	-124.726	-2.17688	(-0.05910354-0.03812109j)	-23.0571	0.070331	-147.178	-2.56875	(-0.06084018-0.05028329j)	-22.0552	0.0789299	-140.427
5.358	(-0.04226486-0.06466606j)	-22.2417	0.0772529	-123.168	-2.14969	(-0.05178791-0.04980566j)	-22.8713	0.0718512	-136.118	-2.3757	(-0.03851778-0.05130843j)	-23.8551	0.0641574	-126.896	-2.21475	(-0.03207254-0.06614648j)	-22.6728	0.0735119	-115.867	-2.02227	(-0.04862219-0.05715308j)	-22.4945	0.0750373	-130.389	-2.27572	(-0.04115558-0.04344995j)	-24.4591	0.0598471	-133.447	-2.32908	(-0.02920884-0.05088378j)	-24.6315	0.0586712	-119.857	-2.0919	(-0.02793439-0.04049564j)	-26.1614	0.0491958	-124.598	-2.17465	(-0.05675424-0.0378793j)	-23.32	0.068234	-146.28	-2.55306	(-0.06007865-0.05013497j)	-22.1304	0.0782493	-140.155
5.3585	(-0.04069973-0.06321895j)	-22.4771	0.0751871	-122.773	-2.14279	(-0.04967833-0.0477683j)	-23.2333	0.0689184	-136.123	-2.37579	(-0.03698181-0.0491633j)	-24.2197	0.0615198	-126.951	-2.21572	(-0.03033132-0.06264929j)	-23.1471	0.0696055	-115.834	-2.02168	(-0.046196-0.05578263j)	-22.8019	0.0724277	-129.63	-2.26246	(-0.03759986-0.04123633j)	-25.0666	0.0558049	-132.359	-2.3101	(-0.0261394-0.04852118j)	-25.1747	0.0551142	-118.312	-2.06494	(-0.02466434-0.03875207j)	-26.7571	0.0459353	-122.475	-2.1376	(-0.05349142-0.03525116j)	-23.868	0.0640623	-146.615	-2.55891	(-0.05679497-0.04709174j)	-22.6414	0.0737787	-140.336
5.359	(-0.03878656-0.06156382j)	-22.7617	0.0727633	-122.212	-2.133	(-0.04815052-0.04653844j)	-23.4831	0.0669649	-135.975	-2.37322	(-0.03518803-0.04947926j)	-24.334	0.0607157	-125.419	-2.18898	(-0.0284231-0.06341163j)	-23.1615	0.0694903	-114.143	-1.99218	(-0.0437053-0.05510159j)	-23.0572	0.0703302	-128.421	-2.24136	(-0.03713019-0.04151262j)	-25.0837	0.0556951	-131.81	-2.30053	(-0.02441213-0.04811832j)	-25.3591	0.0539567	-116.9	-2.0403	(-0.02270154-0.03815505j)	-27.0528	0.0443978	-120.752	-2.10752	(-0.05163208-0.0351932j)	-24.0844	0.0624855	-145.721	-2.54331	(-0.05535604-0.04722847j)	-22.7615	0.0727655	-139.53
5.3595	(-0.03733788-0.06112266j)	-22.8987	0.0716247	-121.419	-2.11917	(-0.04637253-0.04547656j)	-23.7484	0.0649502	-135.559	-2.36595	(-0.03293058-0.04717016j)	-24.8024	0.0575278	-124.92	-2.18026	(-0.02537429-0.06245697j)	-23.4249	0.0674146	-112.11	-1.95669	(-0.04199309-0.05181708j)	-23.5179	0.0666965	-129.022	-2.25185	(-0.03306773-0.03936694j)	-25.7786	0.0514124	-130.03	-2.26945	(-0.02200972-0.04642818j)	-25.784	0.051381	-115.364	-2.01348	(-0.01992697-0.03633344j)	-27.6518	0.0414391	-118.742	-2.07245	(-0.04879028-0.03265543j)	-24.6258	0.05871	-146.206	-2.55177	(-0.05249626-0.04556612j)	-23.1586	0.0695135	-139.042
5.36	(-0.0341674-0.05894136j)	-23.3334	0.0681285	-120.1	-2.09614	(-0.04359468-0.04324289j)	-24.2361	0.0614039	-135.232	-2.36025	(-0.03067468-0.04638769j)	-25.0965	0.0556125	-123.475	-2.15505	(-0.02429795-0.06001117j)	-23.7761	0.0647436	-112.043	-1.95551	(-0.04052188-0.05063236j)	-23.7617	0.064851	-128.671	-2.24573	(-0.03134916-0.03864268j)	-26.0624	0.0497597	-129.051	-2.25236	(-0.02097881-0.04533621j)	-26.0285	0.0499548	-114.832	-2.00419	(-0.01815232-0.03428763j)	-28.2242	0.0387962	-117.897	-2.0577	(-0.0466871-0.03125747j)	-25.0076	0.0561846	-146.197	-2.55162	(-0.05026728-0.04396224j)	-23.5072	0.0667793	-138.828
5.3605	(-0.03235152-0.0555718j)	-23.8354	0.0643028	-120.206	-2.09799	(-0.04116822-0.04036021j)	-24.7837	0.0576521	-135.568	-2.3661	(-0.0279769-0.04261614j)	-25.8522	0.0509788	-123.284	-2.15172	(-0.02111523-0.05750025j)	-24.2572	0.0612546	-110.164	-1.92273	(-0.03704233-0.04758305j)	-24.3934	0.0603016	-127.9	-2.23228	(-0.02879794-0.03518366j)	-26.8462	0.0454666	-129.3	-2.25672	(-0.01716674-0.0420352j)	-26.8578	0.0454055	-112.215	-1.95851	(-0.01539246-0.0330049j)	-28.7737	0.0364177	-115.003	-2.00718	(-0.04314262-0.0276521j)	-25.8072	0.0512438	-147.342	-2.57161	(-0.04686628-0.03987791j)	-24.2174	0.0615361	-139.606
5.361	(-0.03139155-0.05393039j)	-24.0961	0.0624013	-120.203	-2.09793	(-0.03975845-0.03954048j)	-25.0249	0.056073	-135.157	-2.35894	(-0.02732123-0.04138762j)	-26.0917	0.0495922	-123.43	-2.15426	(-0.01996504-0.05670079j)	-24.4206	0.0601131	-109.398	-1.90935	(-0.03565439-0.04565346j)	-24.7425	0.0579265	-127.989	-2.23383	(-0.02662033-0.03387461j)	-27.3139	0.0430828	-128.162	-2.23685	(-0.01644056-0.04107378j)	-27.0833	0.0442419	-111.815	-1.95153	(-0.01317768-0.03001442j)	-29.6879	0.0327798	-113.704	-1.9845	(-0.041627-0.02557166j)	-26.222	0.048854	-148.437	-2.59072	(-0.04758272-0.03849441j)	-24.2644	0.061204	-141.027
5.3615	(-0.03002071-0.05133039j)	-24.5148	0.0594647	-120.321	-2.1	(-0.03759084-0.03571447j)	-25.7047	0.0518517	-136.466	-2.38179	(-0.02534792-0.03882908j)	-26.6752	0.0463704	-123.137	-2.14914	(-0.01816025-0.05347472j)	-24.963	0.0564742	-108.758	-1.89818	(-0.03534341-0.04329326j)	-25.0536	0.055888	-129.227	-2.25544	(-0.0245896-0.03082762j)	-28.0827	0.0394334	-128.578	-2.2441	(-0.01449284-0.03768665j)	-27.8773	0.0403773	-111.035	-1.93792	(-0.01227571-0.02827432j)	-30.2222	0.0308242	-113.469	-1.9804	(-0.03991322-0.022531j)	-26.7763	0.0458335	-150.555	-2.62769	(-0.04565169-0.03492985j)	-24.8094	0.0574819	-142.579
5.362	(-0.02853625-0.04916881j)	-24.9054	0.0568497	-120.13	-2.09666	(-0.03646709-0.03336258j)	-26.1209	0.0494258	-137.546	-2.40062	(-0.02476282-0.03609633j)	-27.1757	0.0437738	-124.451	-2.17208	(-0.0178546-0.04999902j)	-25.4995	0.0530913	-109.652	-1.91378	(-0.03452807-0.04040723j)	-25.4899	0.0531501	-130.514	-2.2779	(-0.02485638-0.02880242j)	-28.3941	0.038045	-130.794	-2.28279	(-0.01359485-0.03654128j)	-28.1813	0.0389883	-110.407	-1.92697	(-0.01091121-0.02590199j)	-31.0239	0.0281064	-112.843	-1.96949	(-0.0412567-0.02003293j)	-26.7707	0.0458632	-154.1	-2.68956	(-0.04478935-0.03314221j)	-25.0801	0.055718	-143.5
5.3625	(-0.0270969-0.04553155j)	-25.517	0.0529846	-120.758	-2.10762	(-0.034737-0.03005325j)	-26.7575	0.0459332	-139.135	-2.42836	(-0.02242969-0.03343396j)	-27.9024	0.0402607	-123.856	-2.1617	(-0.01603435-0.04847115j)	-25.8393	0.0510544	-108.304	-1.89027	(-0.03251407-0.03701212j)	-26.1492	0.0492652	-131.298	-2.29159	(-0.02277501-0.02517689j)	-29.3833	0.0339496	-132.132	-2.30615	(-0.01171565-0.03312058j)	-29.086	0.0351316	-109.48	-1.91079	(-0.009552232-0.02206426j)	-32.3801	0.0240432	-113.409	-1.97936	(-0.03830649-0.01615296j)	-27.6238	0.0415729	-157.136	-2.74254	(-0.04229641-0.02898338j)	-25.8021	0.051274	-145.579
5.363	(-0.02582685-0.04440819j)	-25.7854	0.0513723	-120.181	-2.09756	(-0.03363864-0.02714746j)	-27.285	0.0432266	-141.095	-2.46258	(-0.02108808-0.0306433j)	-28.5895	0.0371984	-124.535	-2.17354	(-0.0161228-0.04561601j)	-26.3064	0.0483815	-109.466	-1.91054	(-0.03165597-0.03547236j)	-26.4582	0.0475435	-131.746	-2.2994	(-0.02171352-0.02316805j)	-29.9644	0.0317527	-133.144	-2.3238	(-0.01097715-0.03099742j)	-29.6604	0.0328837	-109.501	-1.91115	(-0.008323767-0.02134813j)	-32.7982	0.0229135	-111.301	-1.94257	(-0.03551552-0.01545887j)	-28.2381	0.0387341	-156.478	-2.73105	(-0.04033894-0.02705685j)	-26.2722	0.0485727	-146.149
5.3635	(-0.02524863-0.04006498j)	-26.4923	0.0473571	-122.219	-2.13312	(-0.03320872-0.02356663j)	-27.8036	0.0407211	-144.639	-2.52442	(-0.02041454-0.02717003j)	-29.3743	0.0339848	-126.92	-2.21517	(-0.01527674-0.04239729j)	-26.9231	0.0450656	-109.815	-1.91664	(-0.03104313-0.03106699j)	-27.1471	0.0439185	-134.978	-2.35581	(-0.01960574-0.02024677j)	-31.0001	0.0281836	-134.078	-2.34011	(-0.01010009-0.02798717j)	-30.5291	0.0297539	-109.844	-1.91713	(-0.007265233-0.01753115j)	-34.4355	0.018977	-112.51	-1.96367	(-0.035715-0.01102528j)	-28.5477	0.037378	-162.844	-2.84217	(-0.03970521-0.02251415j)	-26.8123	0.0456442	-150.445
5.364	(-0.02471972-0.03598532j)	-27.1988	0.0436578	-124.487	-2.1727	(-0.03281336-0.01944301j)	-28.3721	0.0381411	-149.352	-2.60668	(-0.0208242-0.02388024j)	-29.983	0.0316846	-131.089	-2.28794	(-0.01476519-0.03779591j)	-27.8343	0.0405776	-111.338	-1.94322	(-0.02993438-0.02687379j)	-27.9095	0.0402277	-138.084	-2.41002	(-0.02046268-0.01535565j)	-31.8408	0.0255835	-143.115	-2.49782	(-0.009501508-0.0232251j)	-32.0088	0.0250935	-112.25	-1.95913	(-0.005794223-0.01339456j)	-36.7165	0.0145941	-113.392	-1.97907	(-0.03489443-0.007094098j)	-28.969	0.0356083	-168.508	-2.94102	(-0.03958738-0.01905095j)	-27.1442	0.0439329	-154.301
5.3645	(-0.02531301-0.03422633j)	-27.418	0.0425698	-126.486	-2.20759	(-0.0313766-0.01686946j)	-28.9651	0.035624	-151.736	-2.64828	(-0.01990997-0.02014262j)	-30.9575	0.0283219	-134.667	-2.35039	(-0.01518182-0.03592303j)	-28.1788	0.0389994	-112.91	-1.97065	(-0.03034732-0.02490069j)	-28.122	0.0392556	-140.63	-2.45446	(-0.0201537-0.0134106j)	-32.3209	0.0242078	-146.36	-2.55446	(-0.008752158-0.0217783j)	-32.5893	0.0234711	-111.894	-1.95292	(-0.006472148-0.01174371j)	-37.452	0.0134091	-118.86	-2.0745	(-0.0343319-0.004180665j)	-29.2221	0.0345855	-173.057	-3.02042	(-0.03960751-0.01590006j)	-27.3955	0.0426798	-158.127
5.365	(-0.02404727-0.03057849j)	-28.2007	0.0389014	-128.182	-2.2372	(-0.03158284-0.01449776j)	-29.1806	0.0347514	-155.343	-2.71125	(-0.02024471-0.01822031j)	-31.297	0.0272365	-138.013	-2.40878	(-0.01420245-0.03308217j)	-28.8735	0.0360019	-113.234	-1.97631	(-0.02893279-0.02191667j)	-28.8027	0.0362966	-142.856	-2.49331	(-0.01847965-0.01018508j)	-33.5141	0.0211006	-151.139	-2.63787	(-0.008695836-0.01892877j)	-33.6259	0.0208306	-114.674	-2.00144	(-0.00509231-0.008725729j)	-39.911	0.010103	-120.268	-2.09907	(-0.03326953-0.0007577918000000001j)	-29.5568	0.0332782	-178.695	-3.11882	(-0.03922332-0.01342303j)	-27.6481	0.0414566	-161.108
5.3655	(-0.02628321-0.02708874j)	-28.463	0.037744	-134.135	-2.3411	(-0.03236264-0.01135659j)	-29.2948	0.0342974	-160.663	-2.8041	(-0.01980996-0.01484542j)	-32.1267	0.0247552	-143.152	-2.49848	(-0.01524274-0.03099628j)	-29.2332	0.0345414	-116.186	-2.02783	(-0.0308047-0.01827925j)	-28.9175	0.0358198	-149.315	-2.60605	(-0.01998321-0.007356544j)	-33.4347	0.0212943	-159.79	-2.78885	(-0.009578718-0.0163152j)	-34.4619	0.0189192	-120.417	-2.10168	(-0.006142654-0.005789442j)	-41.4722	0.00844096	-136.696	-2.38579	(-0.03340976+0.001867324j)	-29.509	0.0334619	176.801	3.08576	(-0.03945186-0.009876567j)	-27.8147	0.0406693	-165.945
5.366	(-0.02654912-0.02341808j)	-29.0196	0.0354014	-138.586	-2.41877	(-0.03252701-0.007441678j)	-29.5335	0.0333674	-167.113	-2.91668	(-0.02192336-0.01109326j)	-32.1918	0.0245702	-153.161	-2.67316	(-0.01634746-0.02630869j)	-30.1801	0.030974	-121.856	-2.12678	(-0.03076142-0.01428518j)	-29.3918	0.0339165	-155.09	-2.70684	(-0.02002825-0.003957405j)	-33.8008	0.0204155	-168.823	-2.94651	(-0.01045707-0.0110856j)	-36.3406	0.0152395	-133.329	-2.32703	(-0.006072648-0.00179056j)	-43.9704	0.00633113	-163.572	-2.85486	(-0.03417486+0.00513628j)	-29.2289	0.0345587	171.453	2.99242	(-0.03906644-0.005611598j)	-28.0752	0.0394674	-171.826
5.3665	(-0.02690201-0.02093508j)	-29.348	0.0340881	-142.11	-2.48029	(-0.03366214-0.0033826180000000004j)	-29.4135	0.0338317	-174.262	-3.04144	(-0.02138381-0.008615714j)	-32.745	0.0230542	-158.055	-2.75858	(-0.01580813-0.02413687j)	-30.7962	0.0288528	-123.222	-2.15063	(-0.0307232-0.01219651j)	-29.6151	0.0330556	-158.348	-2.76369	(-0.02062966-0.0012310530000000002j)	-33.6947	0.0206664	-176.585	-3.08199	(-0.01123867-0.01030045j)	-36.3375	0.0152449	-137.494	-2.39973	(-0.007492285+0.0006633793000000001j)	-42.4738	0.0075216	174.94	3.05328	(-0.03445185+0.007959533j)	-29.0299	0.0353594	166.991	2.91454	(-0.03984612-0.003587807j)	-27.9572	0.0400073	-174.855
5.367	(-0.02764509-0.0175358j)	-29.699	0.0327377	-147.612	-2.57632	(-0.03342838-0.0008657777000000001j)	-29.5148	0.0334396	-178.516	-3.1157	(-0.02153151-0.004875229j)	-33.1214	0.0220765	-167.242	-2.91892	(-0.01676215-0.02074129j)	-31.4803	0.0266678	-128.944	-2.25049	(-0.03112263-0.008357785j)	-29.8361	0.0322253	-164.968	-2.87924	(-0.02047085+0.00252638j)	-33.7116	0.0206262	172.965	3.0188	(-0.01084604-0.005736452j)	-38.2234	0.0122696	-152.126	-2.65509	(-0.007774403+0.00314125j)	-41.5299	0.00838503	157.999	2.7576	(-0.03600603+0.01243039j)	-28.3835	0.0380913	160.954	2.80917	(-0.04049488+0.0009241965999999997j)	-27.8497	0.0405054	178.693
5.3675	(-0.02853181-0.01427519j)	-29.9232	0.0319037	-153.42	-2.67768	(-0.03515498+0.0010487349999999999j)	-29.0764	0.0351706	178.291	3.11177	(-0.02327972-0.003288501j)	-32.5746	0.0235108	-171.96	-3.00126	(-0.01846587-0.01846177j)	-31.6633	0.0261118	-135.006	-2.35631	(-0.03366962-0.004742336j)	-29.3699	0.034002	-171.983	-3.00166	(-0.02195537+0.005082711j)	-32.9425	0.022536	166.966	2.9141	(-0.01256767-0.00394242j)	-37.6073	0.0131715	-162.584	-2.83762	(-0.009529288+0.006202516j)	-38.8847	0.0113701	146.94	2.56459	(-0.03720245+0.01475541j)	-27.9541	0.0400218	158.366	2.764	(-0.04190636+0.0033179359999999996j)	-27.5273	0.0420375	175.473
5.368	(-0.0321443-0.01232765j)	-29.262	0.0344271	-159.018	-2.77538	(-0.03741929+0.005542536j)	-28.4438	0.0378275	171.575	2.99454	(-0.0260394-0.00024667189999999983j)	-31.687	0.0260406	-179.457	-3.13212	(-0.02019865-0.01675846j)	-31.6189	0.0262456	-140.318	-2.44901	(-0.03588174-0.003079741j)	-28.8707	0.0360137	-175.094	-3.05597	(-0.02433883+0.007528166j)	-31.8772	0.0254765	162.813	2.84162	(-0.01512241-0.0011804579999999997j)	-36.3812	0.0151684	-175.537	-3.06369	(-0.01170001+0.008218942j)	-36.8943	0.0142983	144.913	2.52921	(-0.03915541+0.01662461j)	-27.4244	0.0425385	156.995	2.74008	(-0.04454778+0.006115387j)	-26.9424	0.0449656	172.183
5.3685	(-0.03233865-0.008429646j)	-29.5201	0.0334193	-165.39	-2.8866	(-0.03793813+0.009629377j)	-28.1473	0.0391411	165.758	2.89302	(-0.02591683+0.003669107j)	-31.6422	0.0261753	171.942	3.00095	(-0.0220271-0.0119395j)	-32.0222	0.0250548	-151.541	-2.64488	(-0.03603056+0.001706749j)	-28.8568	0.036071	177.288	3.09426	(-0.02591125+0.01230592j)	-30.8469	0.028685	154.596	2.6982	(-0.01531276+0.00260976j)	-36.1746	0.0155336	170.328	2.97278	(-0.01202588+0.01228725j)	-35.293	0.017193	134.384	2.34544	(-0.03946029+0.02214921j)	-26.8873	0.0452515	150.694	2.63011	(-0.04448373+0.0103056j)	-26.8089	0.0456619	166.956
5.369	(-0.0346991-0.004680166j)	-29.1153	0.0350133	-172.318	-3.00752	(-0.03968408+0.01287025j)	-27.5933	0.0417189	162.031	2.82798	(-0.02715797+0.007547166999999999j)	-30.999	0.0281871	164.469	2.87053	(-0.02346962-0.007885326j)	-32.1254	0.0247589	-161.429	-2.81746	(-0.03770962+0.00518709j)	-28.3896	0.0380647	172.168	3.0049	(-0.02595785+0.01502275j)	-30.46	0.0299915	149.94	2.61695	(-0.01688043+0.005881339j)	-34.9548	0.0178757	160.791	2.80633	(-0.01314304+0.01597361j)	-33.6866	0.0206856	129.447	2.25928	(-0.03983684+0.02549108j)	-26.5038	0.0472945	147.385	2.57236	(-0.04646793+0.01368612j)	-26.2956	0.0484415	163.589
5.3695	(-0.0371586-0.003005313j)	-28.5705	0.0372799	-175.376	-3.06089	(-0.04223583+0.01460291j)	-26.996	0.044689	160.927	2.80871	(-0.02962554+0.009693709j)	-30.1249	0.0311712	161.881	2.82537	(-0.02708939-0.006128551j)	-31.1272	0.027774	-167.252	-2.9191	(-0.04063551+0.006866753j)	-27.6996	0.0412116	170.409	2.97419	(-0.02866944+0.01592387j)	-29.6839	0.0327949	150.951	2.63459	(-0.02069868+0.007405624j)	-33.158	0.0219836	160.314	2.798	(-0.01515167+0.01780899j)	-32.6222	0.0233823	130.391	2.27575	(-0.04344081+0.02777996j)	-25.7531	0.0515638	147.401	2.57264	(-0.04858814+0.01633957j)	-25.8041	0.051262	161.413
5.37	(-0.03895343-0.0004347890000000001j)	-28.1885	0.0389559	-179.361	-3.13043	(-0.0442069+0.01604959j)	-26.5525	0.0470302	160.046	2.79333	(-0.03175175+0.01120579j)	-29.4549	0.0336711	160.561	2.80232	(-0.0282201-0.004707736j)	-30.8696	0.0286101	-170.529	-2.97629	(-0.04144279+0.008135349j)	-27.4868	0.0422337	168.894	2.94775	(-0.0313972+0.01898868j)	-28.7084	0.0366927	148.835	2.59766	(-0.02157472+0.008560717j)	-32.6861	0.0232111	158.357	2.76385	(-0.01757176+0.01944972j)	-31.6301	0.0262118	132.096	2.30551	(-0.04420831+0.02843523j)	-25.5863	0.0525636	147.25	2.57001	(-0.05121597+0.01779184j)	-25.3171	0.0542183	160.843
5.3705	(-0.04190135+0.001404662j)	-27.5506	0.0419249	178.08	3.10808	(-0.04608546+0.01940499j)	-26.0199	0.0500042	157.166	2.74306	(-0.03480201+0.01274372j)	-28.6215	0.0370619	159.888	2.79058	(-0.03204209-0.002488736j)	-29.8595	0.0321386	-175.559	-3.06408	(-0.04566322+0.0111158j)	-26.5587	0.0469967	166.319	2.90281	(-0.03287464+0.01987102j)	-28.3103	0.0384135	148.849	2.59791	(-0.02492131+0.01091475j)	-31.3065	0.0272067	156.348	2.72879	(-0.01876611+0.02059333j)	-31.1	0.0278613	132.342	2.3098	(-0.04725706+0.03098979j)	-24.9572	0.0565119	146.744	2.56117	(-0.05332471+0.01976984j)	-24.9021	0.0568715	159.658
5.371	(-0.04329076+0.003218848j)	-27.2482	0.0434103	175.748	3.06738	(-0.04911944+0.02083707j)	-25.4563	0.0533564	157.013	2.74039	(-0.03731766+0.01561872j)	-27.8607	0.0404543	157.289	2.74521	(-0.03501451+0.0004990397j)	-29.1142	0.0350181	179.183	3.12734	(-0.04766757+0.01334598j)	-26.1078	0.0495006	164.359	2.8686	(-0.03604767+0.02292523j)	-27.3874	0.04272	147.545	2.57514	(-0.02709384+0.01248374j)	-30.5065	0.0298315	155.262	2.70983	(-0.023288+0.02255755j)	-29.7833	0.0324218	135.913	2.37213	(-0.04906844+0.03265672j)	-24.5915	0.0589421	146.355	2.55437	(-0.05528029+0.02263082j)	-24.4757	0.0597333	157.737
5.3715	(-0.04744582+0.006021055j)	-26.4067	0.0478263	172.768	3.01536	(-0.05119803+0.0236026j)	-24.978	0.0563766	155.25	2.70962	(-0.03990731+0.01757145j)	-27.2094	0.0436045	156.236	2.72683	(-0.03669775+0.002798168j)	-28.682	0.0368043	175.64	3.06549	(-0.05023297+0.01564528j)	-25.5781	0.052613	162.701	2.83966	(-0.03783175+0.024676j)	-26.9034	0.045168	146.885	2.56363	(-0.02964677+0.01557369j)	-29.5021	0.0334884	152.287	2.6579	(-0.02473487+0.02500637j)	-29.0758	0.0351729	134.687	2.35074	(-0.05251589+0.03657052j)	-23.8771	0.0639947	145.148	2.53331	(-0.05917668+0.02559011j)	-23.8125	0.0644727	156.615
5.372	(-0.04947355+0.007754661j)	-26.0071	0.0500776	171.092	2.98611	(-0.05386839+0.02482621j)	-24.5369	0.0593139	155.257	2.70974	(-0.04392719+0.01894021j)	-26.4048	0.0478365	156.676	2.73451	(-0.03941023+0.003831033j)	-28.047	0.039596	174.448	3.04469	(-0.05310299+0.01684879j)	-25.081	0.0557118	162.397	2.83435	(-0.04009731+0.02676552j)	-26.3373	0.0482098	146.276	2.553	(-0.03238796+0.01653621j)	-28.7863	0.0363652	152.953	2.66953	(-0.02784139+0.02567825j)	-28.4329	0.037875	137.315	2.39659	(-0.05345975+0.03684774j)	-23.7513	0.0649284	145.423	2.53811	(-0.06073562+0.02745711j)	-23.5235	0.0666536	155.673
5.3725	(-0.05277326+0.007685124j)	-25.4606	0.0533299	171.715	2.99698	(-0.05590385+0.02549921j)	-24.2303	0.0614447	155.481	2.71366	(-0.04515458+0.02024206j)	-26.1107	0.0494841	155.854	2.72017	(-0.04230843+0.003678714j)	-27.4388	0.0424681	175.031	3.05486	(-0.05661283+0.01821075j)	-24.5141	0.0594697	162.168	2.83037	(-0.04413341+0.0260716j)	-25.8046	0.051259	149.428	2.60801	(-0.03571674+0.01646244j)	-28.1059	0.0393281	155.254	2.7097	(-0.03056846+0.02591962j)	-27.9418	0.0400781	139.705	2.43831	(-0.05724682+0.03725714j)	-23.3112	0.0683029	146.943	2.56464	(-0.06282954+0.02720706j)	-23.2903	0.0684673	156.586
5.373	(-0.05718097+0.009758486j)	-24.7303	0.0580077	170.315	2.97256	(-0.05904644+0.02648142j)	-23.7802	0.0647128	155.844	2.72	(-0.04832539+0.02012934j)	-25.6216	0.0523501	157.386	2.74691	(-0.04594134+0.004706939j)	-26.7106	0.0461818	174.15	3.03949	(-0.05853682+0.01966053j)	-24.1872	0.0617503	161.435	2.81756	(-0.04693744+0.02756109j)	-25.2831	0.054431	149.579	2.61065	(-0.03890548+0.01798694j)	-27.3585	0.0428622	155.188	2.70854	(-0.03400822+0.02710341j)	-27.2327	0.0434874	141.446	2.4687	(-0.05920349+0.03948889j)	-22.9547	0.0711648	146.297	2.55336	(-0.06705017+0.02921415j)	-22.7171	0.0731382	156.457
5.3735	(-0.05998451+0.01047566j)	-24.3087	0.0608924	170.094	2.9687	(-0.06297908+0.02876678j)	-23.1931	0.0692379	155.451	2.71313	(-0.05167915+0.02179628j)	-25.0227	0.0560875	157.132	2.74247	(-0.04910831+0.006064996j)	-26.1112	0.0494814	172.959	3.01871	(-0.06288056+0.02099873j)	-23.5705	0.0662941	161.533	2.81929	(-0.04987404+0.02874387j)	-24.797	0.0575641	150.044	2.61876	(-0.04233699+0.01848296j)	-26.708	0.0461957	156.415	2.72997	(-0.03645332+0.02902618j)	-26.6327	0.0465979	141.471	2.46914	(-0.06249202+0.04145391j)	-22.4998	0.0749912	146.442	2.55589	(-0.07131672+0.0295871j)	-22.2465	0.0772106	157.468
5.374	(-0.06185548+0.01214516j)	-24.0082	0.0630365	168.891	2.94771	(-0.06476115+0.02867201j)	-22.9963	0.0708244	156.119	2.7248	(-0.05273421+0.02264174j)	-24.8234	0.0573894	156.763	2.73604	(-0.05180248+0.00553749j)	-25.6636	0.0520976	173.898	3.0351	(-0.06510702+0.02127946j)	-23.2867	0.0684963	161.901	2.8257	(-0.05140605+0.02990712j)	-24.5136	0.0594728	149.81	2.61468	(-0.04380517+0.01935912j)	-26.3947	0.0478923	156.158	2.72546	(-0.0377744+0.02940952j)	-26.3982	0.047873	142.097	2.48006	(-0.06425922+0.04136973j)	-22.3353	0.0764245	147.227	2.56959	(-0.07146753+0.03162672j)	-22.1411	0.0781528	156.129
5.3745	(-0.06393699+0.01115392j)	-23.7548	0.0649026	170.104	2.96888	(-0.06799247+0.02939221j)	-22.6067	0.0740735	156.622	2.73357	(-0.05754825+0.02329563j)	-24.1403	0.0620845	157.962	2.75695	(-0.05429884+0.006603495j)	-25.2404	0.0546989	173.066	3.02057	(-0.06659098+0.02217271j)	-23.0751	0.0701854	161.584	2.82017	(-0.05420582+0.02999423j)	-24.159	0.061951	151.043	2.63619	(-0.04677588+0.01923803j)	-25.9209	0.0505775	157.644	2.7514	(-0.04093675+0.02843118j)	-26.0482	0.0498412	145.219	2.53456	(-0.06733963+0.04236261j)	-21.9865	0.0795564	147.826	2.58006	(-0.07390372+0.03113412j)	-21.9172	0.0801941	157.155
5.375	(-0.06725762+0.01188592j)	-23.3116	0.0682998	169.978	2.96668	(-0.06988177+0.02976955j)	-22.3885	0.0759585	156.926	2.73888	(-0.05997327+0.0229576j)	-23.847	0.0642172	159.053	2.776	(-0.0580877+0.007350762j)	-24.6493	0.058551	172.788	3.01572	(-0.07068311+0.02198435j)	-22.6127	0.0740231	162.723	2.84005	(-0.05749995+0.03063132j)	-23.7217	0.06515	151.955	2.65211	(-0.04976973+0.01897583j)	-25.4712	0.0532645	159.13	2.77733	(-0.04429085+0.02955254j)	-25.4744	0.053245	146.287	2.55319	(-0.06982937+0.04243497j)	-21.7543	0.0817121	148.713	2.59553	(-0.07787397+0.03254468j)	-21.4731	0.0844009	157.319
5.3755	(-0.06984203+0.01188874j)	-22.9936	0.0708467	170.34	2.97299	(-0.07267477+0.02945719j)	-22.1117	0.0784178	157.936	2.7565	(-0.06165914+0.02196964j)	-23.681	0.0654562	160.389	2.79931	(-0.05968126+0.006266103j)	-24.4356	0.0600093	174.006	3.03698	(-0.07183082+0.0218373j)	-22.4899	0.0750769	163.09	2.84646	(-0.05916629+0.02937407j)	-23.6017	0.0660567	153.597	2.68078	(-0.05198784+0.01857557j)	-25.1602	0.0552068	160.338	2.79842	(-0.04577657+0.02895342j)	-25.3257	0.0541645	147.687	2.57762	(-0.07131358+0.04250009j)	-21.6166	0.0830174	149.207	2.60415	(-0.07901685+0.03043764j)	-21.4447	0.0846765	158.933
5.376	(-0.07216717+0.01125524j)	-22.7288	0.0730396	171.136	2.98688	(-0.07550257+0.02990373j)	-21.8079	0.0812088	158.393	2.76449	(-0.06409448+0.02102597j)	-23.4197	0.0674551	161.838	2.82461	(-0.06326305+0.006668876j)	-23.929	0.0636136	173.982	3.03657	(-0.07563988+0.02206986j)	-22.0702	0.0787938	163.734	2.8577	(-0.06269106+0.03033632j)	-23.1422	0.0696453	154.178	2.69091	(-0.05469765+0.01882863j)	-24.7543	0.0578476	161.005	2.81007	(-0.0499537+0.02774731j)	-24.8608	0.0571427	150.95	2.63457	(-0.07473361+0.04171245j)	-21.3519	0.0855865	150.832	2.63251	(-0.08291092+0.0327456j)	-20.9982	0.0891431	158.448
5.3765	(-0.07635432+0.01063918j)	-22.2598	0.077092	172.068	3.00314	(-0.07836588+0.0290173j)	-21.5594	0.0835656	159.681	2.78697	(-0.0682533+0.0215283j)	-22.9056	0.071568	162.494	2.83605	(-0.0667441+0.00553967j)	-23.4819	0.0669736	175.255	3.05878	(-0.07867513+0.02186139j)	-21.7602	0.081656	164.471	2.87056	(-0.06645757+0.02890088j)	-22.7969	0.0724698	156.497	2.73139	(-0.05916559+0.01779941j)	-24.1823	0.061785	163.257	2.84936	(-0.05279599+0.02708231j)	-24.5335	0.0593369	152.844	2.66763	(-0.07713707+0.04062702j)	-21.1915	0.0871819	152.225	2.65682	(-0.08561172+0.03139968j)	-20.8012	0.0911883	159.859
5.377	(-0.0788231+0.009116944j)	-22.0092	0.0793486	173.402	3.02644	(-0.08118684+0.02765258j)	-21.3336	0.0857669	161.191	2.81331	(-0.0701746+0.01990824j)	-22.7402	0.0729439	164.162	2.86516	(-0.06976364+0.004357029j)	-23.1105	0.0698996	176.426	3.07922	(-0.08142497+0.01947901j)	-21.5432	0.0837225	166.546	2.90678	(-0.06754782+0.02774668j)	-22.7306	0.0730246	157.669	2.75184	(-0.06050747+0.01635818j)	-24.0575	0.0626797	164.872	2.87755	(-0.054653+0.02547051j)	-24.3941	0.0602967	155.013	2.70548	(-0.0800309+0.03973915j)	-20.9777	0.089354	153.593	2.68071	(-0.08767901+0.03113938j)	-20.6262	0.0930445	160.447
5.3775	(-0.08106966+0.009312363j)	-21.7659	0.0816028	173.447	3.02723	(-0.08203647+0.02739601j)	-21.2607	0.08649	161.533	2.81929	(-0.07256977+0.01939591j)	-22.4852	0.0751171	165.036	2.88042	(-0.07317462+0.004046069j)	-22.6995	0.0732864	176.835	3.08636	(-0.08317263+0.01915584j)	-21.3759	0.0853501	167.03	2.91523	(-0.07000706+0.02675838j)	-22.505	0.0749466	159.082	2.7765	(-0.06361669+0.01590809j)	-23.6652	0.0655755	165.96	2.89656	(-0.05609468+0.02493155j)	-24.2387	0.0613856	156.037	2.72336	(-0.08140334+0.0388677j)	-20.8952	0.0902064	154.477	2.69613	(-0.08936314+0.03015555j)	-20.5085	0.094314	161.353
5.378	(-0.08349267+0.008497916j)	-21.5223	0.083924	174.188	3.04016	(-0.08546082+0.02643939j)	-20.9677	0.0894572	162.809	2.84156	(-0.07590882+0.0183818j)	-22.1467	0.0781027	166.388	2.90401	(-0.07488037+0.003264826j)	-22.5044	0.0749515	177.503	3.09802	(-0.0873994+0.01907489j)	-20.9677	0.0894567	167.688	2.92671	(-0.07271454+0.02624244j)	-22.2358	0.077305	160.156	2.79524	(-0.06589562+0.01518542j)	-23.3981	0.0676227	167.023	2.9151	(-0.0596543+0.02309701j)	-23.8805	0.0639696	158.835	2.77219	(-0.08366407+0.038289j)	-20.7234	0.0920094	155.409	2.71239	(-0.09267741+0.02911283j)	-20.2518	0.0971425	162.561
5.3785	(-0.08572944+0.006419706j)	-21.3131	0.0859695	175.717	3.06685	(-0.08658619+0.02475886j)	-20.9097	0.0900565	164.042	2.86308	(-0.07577709+0.01711164j)	-22.1932	0.0776851	167.275	2.9195	(-0.07694548+0.0004563398999999999j)	-22.2762	0.0769468	179.66	3.13566	(-0.08801028+0.01653502j)	-20.9587	0.0895501	169.36	2.95588	(-0.07298061+0.02485295j)	-22.2593	0.0770963	161.194	2.81337	(-0.06666425+0.0128447j)	-23.3638	0.0678904	169.094	2.95125	(-0.06005718+0.02109073j)	-23.9236	0.0636528	160.65	2.80387	(-0.0848446+0.03696696j)	-20.6726	0.0925482	156.457	2.73069	(-0.093417+0.0276414j)	-20.227	0.0974206	163.517
5.379	(-0.08746867+0.005731556j)	-21.1443	0.0876563	176.251	3.07616	(-0.0886635+0.02418751j)	-20.7334	0.0919035	164.741	2.87527	(-0.07839049+0.0153964j)	-21.9504	0.0798882	168.888	2.94765	(-0.07974376-0.0008020353000000001j)	-21.9656	0.0797478	-179.424	-3.13154	(-0.08893213+0.01482774j)	-20.8997	0.0901598	170.534	2.97638	(-0.07467399+0.02304833j)	-22.1414	0.07815	162.847	2.84222	(-0.06802052+0.01159637j)	-23.2228	0.0690019	170.325	2.97273	(-0.06270533+0.02111513j)	-23.5874	0.066165	161.39	2.81678	(-0.08622044+0.03531694j)	-20.6142	0.0931732	157.725	2.75283	(-0.09521872+0.0262241j)	-20.108	0.0987639	164.602
5.3795	(-0.08888604+0.0016700249999999995j)	-21.0218	0.0889017	178.924	3.12281	(-0.08975148+0.02119057j)	-20.7036	0.0922191	166.716	2.90974	(-0.07971708+0.01196168j)	-21.8723	0.0806095	171.466	2.99265	(-0.08027808-0.00332865j)	-21.9006	0.0803471	-177.626	-3.10015	(-0.0903216+0.01313933j)	-20.7932	0.0912723	171.723	2.99713	(-0.07681162+0.01981389j)	-22.0117	0.079326	165.536	2.88914	(-0.07047916+0.008084304j)	-22.982	0.0709413	173.456	3.02739	(-0.06403262+0.01774333j)	-23.5507	0.0664455	164.512	2.87128	(-0.08762416+0.03310581j)	-20.568	0.0936696	159.303	2.78036	(-0.09688212+0.02385277j)	-20.0195	0.0997752	166.169
5.38	(-0.09088492+0.002620785j)	-20.8266	0.0909227	178.348	3.11276	(-0.09104393+0.02055037j)	-20.5992	0.0933344	167.28	2.91959	(-0.08137887+0.01212594j)	-21.6944	0.0822773	171.525	2.99367	(-0.08275803-0.003623523j)	-21.6355	0.0828373	-177.493	-3.09784	(-0.09312204+0.01221781j)	-20.5448	0.0939201	172.525	3.01114	(-0.07782736+0.01860341j)	-21.936	0.0800199	166.557	2.90696	(-0.07277956+0.007104745j)	-22.7186	0.0731255	174.424	3.04428	(-0.06619691+0.01560093j)	-23.3485	0.0680104	166.739	2.91014	(-0.0893802+0.03226246j)	-20.4433	0.0950247	160.153	2.79519	(-0.09818503+0.02277251j)	-19.9315	0.100791	166.942
5.3805	(-0.09216279-0.00013616829999999998j)	-20.7089	0.0921629	-179.915	-3.14012	(-0.09327725+0.01766148j)	-20.4515	0.0949346	169.278	2.95446	(-0.0834019+0.009303627j)	-21.5228	0.0839192	173.635	3.0305	(-0.08361401-0.006127713j)	-21.5312	0.0838382	-175.809	-3.06844	(-0.09294313+0.009730243j)	-20.5883	0.0934511	174.023	3.03728	(-0.0796909+0.01686771j)	-21.7815	0.0814565	168.049	2.93301	(-0.07345761+0.00437154j)	-22.6639	0.0735876	176.594	3.08215	(-0.06624249+0.0136162j)	-23.3975	0.0676274	168.385	2.93887	(-0.09038874+0.0290275j)	-20.4514	0.0949353	162.196	2.83086	(-0.09890905+0.02031485j)	-19.9158	0.100974	168.393
5.381	(-0.09351251-0.001469062j)	-20.5815	0.093524	-179.1	-3.12588	(-0.09329167+0.01574352j)	-20.4812	0.0946108	170.421	2.97441	(-0.08363377+0.007210413j)	-21.5202	0.083944	175.072	3.05559	(-0.08499525-0.008012288j)	-21.3737	0.0853721	-174.615	-3.0476	(-0.09411939+0.007893292j)	-20.496	0.0944498	175.206	3.05792	(-0.08100712+0.01440843j)	-21.6943	0.0822785	169.914	2.96557	(-0.07364184+0.00348531j)	-22.6478	0.0737243	177.29	3.0943	(-0.06841392+0.01083269j)	-23.1896	0.0692662	171.002	2.98456	(-0.09161806+0.02801028j)	-20.3723	0.0958042	163	2.84489	(-0.1004444+0.01843221j)	-19.8176	0.102122	169.602
5.3815	(-0.0942438-0.005064152j)	-20.5024	0.0943798	-176.924	-3.08791	(-0.09433591+0.01365095j)	-20.4165	0.0953185	171.766	2.99788	(-0.08563197+0.00478171j)	-21.3338	0.0857654	176.804	3.08581	(-0.08708951-0.01046152j)	-21.1385	0.0877156	-173.15	-3.02204	(-0.09536286+0.006454098j)	-20.3926	0.095581	176.128	3.07402	(-0.08175232+0.01256505j)	-21.6486	0.0827123	171.262	2.98909	(-0.07579324+0.0007619180999999999j)	-22.407	0.0757971	179.424	3.13154	(-0.0683362+0.009006182j)	-23.2322	0.0689271	172.492	3.01056	(-0.09236386+0.02580764j)	-20.3635	0.0959016	164.389	2.86913	(-0.1011707+0.01680194j)	-19.7807	0.102556	170.571
5.382	(-0.09410385-0.008264884j)	-20.4945	0.0944661	-174.981	-3.05399	(-0.09335411+0.01094276j)	-20.5381	0.0939933	173.314	3.02491	(-0.0846059+0.001485923j)	-21.4506	0.0846189	178.994	3.12403	(-0.08629975-0.01331838j)	-21.1776	0.0873214	-171.227	-2.98847	(-0.09574687+0.0030114j)	-20.3732	0.0957942	178.199	3.11015	(-0.08136833+0.009138296j)	-21.7365	0.0818799	173.592	3.02975	(-0.07587245-0.002453501j)	-22.3938	0.0759121	-178.148	-3.10927	(-0.06895103+0.005824319j)	-23.1983	0.0691966	175.172	3.05732	(-0.09165954+0.02282473j)	-20.4952	0.0944587	166.017	2.89754	(-0.1010173+0.01466064j)	-19.8216	0.102076	171.742
5.3825	(-0.09525722-0.008785129j)	-20.3853	0.0956615	-174.731	-3.04963	(-0.09460549+0.009281849j)	-20.4401	0.0950597	174.397	3.04379	(-0.08531857-0.0005090455999999998j)	-21.379	0.0853201	-179.658	-3.13563	(-0.08743756-0.01473959j)	-21.0443	0.0886712	-170.431	-2.97459	(-0.09723313+0.001432847j)	-20.2428	0.0972437	179.156	3.12686	(-0.08207604+0.007060843j)	-21.6836	0.0823792	175.083	3.05578	(-0.0765062-0.003960288j)	-22.3144	0.0766086	-177.037	-3.08987	(-0.0697505+0.00319653j)	-23.1199	0.0698237	177.376	3.0958	(-0.09238762+0.02087782j)	-20.4714	0.0947172	167.266	2.91934	(-0.1009231+0.01333966j)	-19.845	0.101801	172.47
5.383	(-0.09655235-0.01116851j)	-20.247	0.0971962	-173.402	-3.02643	(-0.0952263+0.007196823j)	-20.4001	0.0954979	175.678	3.06616	(-0.08567942-0.0015437619999999997j)	-21.3411	0.0856933	-178.968	-3.12358	(-0.08756227-0.01709296j)	-20.9912	0.089215	-168.954	-2.94881	(-0.09528865-6.523110000000005e-05j)	-20.4192	0.0952887	-179.961	-3.14091	(-0.08153831+0.005258665j)	-21.7547	0.0817077	176.31	3.07719	(-0.07660165-0.006972988j)	-22.2794	0.0769184	-174.799	-3.05081	(-0.07018207+0.001571541j)	-23.0733	0.0701997	178.717	3.1192	(-0.09265851+0.01955325j)	-20.4731	0.0946992	168.084	2.93362	(-0.1014274+0.01122889j)	-19.824	0.102047	173.683
5.3835	(-0.0956271-0.01329793j)	-20.3052	0.0965473	-172.083	-3.00342	(-0.09493045+0.005338102j)	-20.4382	0.0950804	176.782	3.08542	(-0.08562888-0.003480083j)	-21.3404	0.0856996	-177.673	-3.10097	(-0.08868122-0.01945445j)	-20.8392	0.0907901	-167.627	-2.92564	(-0.0968535-0.002216842j)	-20.2754	0.0968789	-178.689	-3.11871	(-0.08215766+0.003114246j)	-21.7008	0.0822167	177.829	3.10371	(-0.07643416-0.00909958j)	-22.2731	0.0769739	-173.211	-3.0231	(-0.06920231-0.001249277j)	-23.1962	0.0692136	-178.966	-3.12354	(-0.09198151+0.0175836j)	-20.5701	0.0936471	169.178	2.95271	(-0.1006358+0.009312476j)	-19.9079	0.101066	174.713
5.384	(-0.09432685-0.01636705j)	-20.3785	0.0957363	-170.156	-2.96979	(-0.09421269+0.002425766j)	-20.5149	0.0942439	178.525	3.11585	(-0.08492774-0.00744253j)	-21.3858	0.0852532	-174.992	-3.05418	(-0.08726116-0.02246846j)	-20.9048	0.0901074	-165.561	-2.88958	(-0.09580416-0.005327285j)	-20.3589	0.0959522	-176.817	-3.08604	(-0.0812279-0.0003124731000000002j)	-21.8058	0.0812285	-179.78	-3.13775	(-0.07547286-0.01169787j)	-22.3411	0.076374	-171.19	-2.98782	(-0.0684276-0.004650285j)	-23.2754	0.0685854	-176.112	-3.07374	(-0.09074641+0.01439364j)	-20.7355	0.0918808	170.987	2.98429	(-0.09938855+0.006444626j)	-20.0351	0.0995973	176.29
5.3845	(-0.09457044-0.01863789j)	-20.3194	0.0963895	-168.851	-2.94701	(-0.0931951-0.00012026150000000015j)	-20.6121	0.0931952	-179.926	-3.1403	(-0.08335475-0.009879107j)	-21.5208	0.0839381	-173.241	-3.02362	(-0.08630667-0.02487114j)	-20.9327	0.0898188	-163.925	-2.86102	(-0.09520315-0.007561678j)	-20.3997	0.095503	-175.459	-3.06233	(-0.07982438-0.001987137j)	-21.9546	0.0798491	-178.574	-3.1167	(-0.07528584-0.014643j)	-22.3045	0.0766966	-168.993	-2.94949	(-0.06766576-0.007308308j)	-23.3423	0.0680593	-173.836	-3.034	(-0.09032755+0.01105446j)	-20.819	0.0910015	173.023	3.01982	(-0.09919462+0.004724562j)	-20.0604	0.0993071	177.273
5.385	(-0.09473645-0.0207836j)	-20.2655	0.0969894	-167.626	-2.92563	(-0.09327202-0.001877437j)	-20.6032	0.0932909	-178.847	-3.12147	(-0.08319546-0.01126969j)	-21.519	0.0839553	-172.286	-3.00695	(-0.08685873-0.02688877j)	-20.8263	0.0909255	-162.799	-2.84138	(-0.09456506-0.009373195j)	-20.4429	0.0950285	-174.339	-3.0428	(-0.0803128-0.003544281j)	-21.8959	0.080391	-177.473	-3.09749	(-0.07516088-0.01697422j)	-22.2641	0.0770538	-167.274	-2.91948	(-0.06732208-0.008696869j)	-23.365	0.0678815	-172.639	-3.01312	(-0.08900219+0.009734393j)	-20.9603	0.0895329	173.758	3.03265	(-0.09803821+0.002601574j)	-20.169	0.0980727	178.48
5.3855	(-0.09180021-0.02211861j)	-20.4981	0.0944273	-166.453	-2.90516	(-0.0900853-0.00359954j)	-20.9	0.0901572	-177.712	-3.10166	(-0.08095988-0.01299421j)	-21.7241	0.081996	-170.882	-2.98245	(-0.08482934-0.0281865j)	-20.9743	0.0893896	-161.62	-2.8208	(-0.09232138-0.01182468j)	-20.6233	0.0930756	-172.701	-3.0142	(-0.07751105-0.006225012j)	-22.1848	0.0777606	-175.408	-3.06145	(-0.07182807-0.0184256j)	-22.5973	0.0741537	-165.613	-2.89048	(-0.06571241-0.01080454j)	-23.5312	0.0665947	-170.663	-2.97863	(-0.0858971+0.008881573j)	-21.2742	0.086355	174.097	3.03856	(-0.0961237-0.0004533744j)	-20.3433	0.0961248	-179.73
5.386	(-0.09040689-0.02281586j)	-20.6078	0.0932415	-165.836	-2.89439	(-0.08842546-0.005268029j)	-21.0531	0.0885822	-176.591	-3.08209	(-0.07995407-0.01512778j)	-21.7904	0.0813726	-169.286	-2.9546	(-0.08284673-0.03023276j)	-21.0915	0.0881907	-159.952	-2.79168	(-0.09135263-0.01199457j)	-20.7113	0.0921367	-172.52	-3.01104	(-0.07644097-0.009016915j)	-22.2735	0.0769709	-173.273	-3.02418	(-0.07176241-0.02063806j)	-22.5369	0.0746711	-163.955	-2.86156	(-0.06385738-0.01328909j)	-23.7117	0.0652255	-168.244	-2.93642	(-0.08484669+0.006894639j)	-21.3987	0.0851264	175.354	3.06051	(-0.09388288-0.0008930869j)	-20.5479	0.0938871	-179.455
5.3865	(-0.09047633-0.02632954j)	-20.5163	0.0942296	-163.774	-2.8584	(-0.08827668-0.007524733j)	-21.0516	0.0885968	-175.128	-3.05656	(-0.07938582-0.01769748j)	-21.7945	0.0813346	-167.433	-2.92225	(-0.08292606-0.03308603j)	-20.9846	0.0892828	-158.249	-2.76196	(-0.09013835-0.01549168j)	-20.7754	0.0914599	-170.248	-2.97139	(-0.07500742-0.009996479j)	-22.4215	0.0756706	-172.409	-3.0091	(-0.07094812-0.02362011j)	-22.5247	0.0747766	-161.586	-2.82021	(-0.06323164-0.01584372j)	-23.7169	0.0651864	-165.933	-2.89608	(-0.08418126+0.005041938j)	-21.4801	0.0843321	176.572	3.08177	(-0.09315505-0.004208333j)	-20.607	0.0932501	-177.413
5.387	(-0.0883047-0.02553843j)	-20.7315	0.0919235	-163.87	-2.86007	(-0.08660569-0.007740147j)	-21.2145	0.0869509	-174.893	-3.05246	(-0.07677213-0.01879312j)	-22.0432	0.0790389	-166.245	-2.90152	(-0.08140278-0.03375626j)	-21.0981	0.0881243	-157.477	-2.74849	(-0.08853316-0.01569631j)	-20.9235	0.0899138	-169.946	-2.96612	(-0.07321972-0.01048899j)	-22.6192	0.0739672	-171.848	-2.99931	(-0.0682487-0.0245278j)	-22.7906	0.0725224	-160.232	-2.79658	(-0.06144754-0.01690541j)	-23.913	0.0637306	-164.617	-2.87312	(-0.08144002+0.003894628j)	-21.7733	0.0815331	177.262	3.09381	(-0.09198239-0.004339742j)	-20.7162	0.0920847	-177.299
5.3875	(-0.08508001-0.02824686j)	-20.9493	0.0896465	-161.634	-2.82104	(-0.0822759-0.00973922j)	-21.6341	0.0828503	-173.249	-3.02377	(-0.07438686-0.01923334j)	-22.289	0.0768331	-165.503	-2.88858	(-0.07853261-0.03619986j)	-21.2623	0.0864743	-155.253	-2.70967	(-0.08523808-0.0176237j)	-21.2055	0.0870409	-168.318	-2.93771	(-0.06968389-0.01290595j)	-22.9909	0.0708689	-169.507	-2.95846	(-0.06562077-0.02548105j)	-23.0492	0.0703944	-158.778	-2.77121	(-0.05805316-0.01868895j)	-24.2952	0.0609873	-162.155	-2.83014	(-0.07829423+0.002236342j)	-22.1219	0.0783262	178.364	3.11304	(-0.08803363-0.0046476j)	-21.0949	0.0881562	-176.978
5.388	(-0.08333021-0.03012167j)	-21.0506	0.0886072	-160.126	-2.79473	(-0.07981884-0.0117319j)	-21.8651	0.0806764	-171.638	-2.99566	(-0.07234271-0.02273014j)	-22.4032	0.0758296	-162.557	-2.83716	(-0.07586-0.03724214j)	-21.462	0.0845087	-153.852	-2.68523	(-0.08213853-0.01881819j)	-21.4869	0.0842666	-167.096	-2.91638	(-0.0685835-0.01547999j)	-23.0598	0.0703088	-167.281	-2.9196	(-0.0632989-0.02791487j)	-23.2003	0.0691809	-156.202	-2.72625	(-0.05580245-0.020771j)	-24.5034	0.0595428	-159.584	-2.78526	(-0.07602024-0.0007950240000000001j)	-22.3809	0.0760244	-179.401	-3.13113	(-0.08494586-0.007026141j)	-21.3875	0.0852359	-175.272
5.3885	(-0.08116147-0.03023269j)	-21.2487	0.0866095	-159.57	-2.78502	(-0.07857569-0.01288225j)	-21.979	0.0796247	-170.689	-2.97909	(-0.06950191-0.02207006j)	-22.7428	0.0729219	-162.383	-2.83412	(-0.07524513-0.03840838j)	-21.4648	0.084481	-152.958	-2.66963	(-0.08123003-0.01925018j)	-21.5684	0.0834799	-166.668	-2.9089	(-0.06623929-0.01587324j)	-23.3352	0.0681146	-166.524	-2.90639	(-0.06198028-0.02845358j)	-23.3244	0.0681994	-155.341	-2.71122	(-0.05390913-0.02176331j)	-24.711	0.0581364	-158.016	-2.7579	(-0.07398349-0.001147996j)	-22.6163	0.0739924	-179.111	-3.12608	(-0.08405791-0.007271696j)	-21.476	0.0843719	-175.056
5.389	(-0.07795987-0.03085913j)	-21.5304	0.0838453	-158.405	-2.76468	(-0.07559594-0.01316471j)	-22.3003	0.0767337	-170.121	-2.96918	(-0.06745779-0.02362875j)	-22.9168	0.0714764	-160.696	-2.80467	(-0.07136371-0.03942693j)	-21.7736	0.0815307	-151.08	-2.63685	(-0.07761396-0.0204738j)	-21.909	0.0802689	-165.223	-2.88368	(-0.06260403-0.01669991j)	-23.7694	0.0647931	-165.064	-2.88091	(-0.05936721-0.02938303j)	-23.5775	0.0662407	-153.667	-2.682	(-0.05025113-0.02261625j)	-25.176	0.055106	-155.769	-2.71869	(-0.06987368-0.001325969j)	-23.1122	0.0698863	-178.913	-3.12262	(-0.08068052-0.00906815j)	-21.8101	0.0811885	-173.587
5.3895	(-0.0747499-0.03093254j)	-21.8413	0.0808973	-157.52	-2.74923	(-0.07176874-0.01312683j)	-22.7384	0.0729593	-169.635	-2.96069	(-0.06355146-0.02339747j)	-23.3854	0.0677217	-159.788	-2.78883	(-0.06843614-0.03908745j)	-22.0682	0.078812	-150.267	-2.62265	(-0.07436118-0.02058824j)	-22.2523	0.0771587	-164.524	-2.87149	(-0.05858072-0.01697912j)	-24.2946	0.0609917	-163.836	-2.85948	(-0.05458883-0.02912731j)	-24.1699	0.0618736	-151.917	-2.65145	(-0.04684469-0.02297867j)	-25.6504	0.052177	-153.871	-2.68555	(-0.06622943-0.001105398j)	-23.5778	0.0662387	-179.044	-3.1249	(-0.07737588-0.008480811j)	-22.176	0.0778393	-173.745
5.39	(-0.07430892-0.03039462j)	-21.9073	0.0802848	-157.754	-2.75333	(-0.06910423-0.01291666j)	-23.0608	0.070301	-169.413	-2.95681	(-0.06121151-0.02351244j)	-23.6656	0.065572	-158.987	-2.77485	(-0.06689458-0.03953176j)	-22.1913	0.0777023	-149.419	-2.60785	(-0.07308011-0.0210843j)	-22.3768	0.0760608	-163.907	-2.86071	(-0.05683202-0.01739335j)	-24.5193	0.0594341	-162.983	-2.8446	(-0.05418148-0.03042524j)	-24.1326	0.0621396	-150.684	-2.62993	(-0.04486429-0.02310432j)	-25.9404	0.050464	-152.752	-2.66603	(-0.06472495-0.001991182j)	-23.7745	0.0647556	-178.238	-3.11084	(-0.0745351-0.008100706j)	-22.5018	0.074974	-173.797
5.3905	(-0.07111859-0.03209966j)	-22.1551	0.0780272	-155.708	-2.71761	(-0.06687921-0.01360318j)	-23.3181	0.0682486	-168.503	-2.94093	(-0.05952295-0.02437511j)	-23.833	0.0643205	-157.731	-2.75292	(-0.06427095-0.03996664j)	-22.4199	0.0756841	-148.125	-2.58526	(-0.06976327-0.02064711j)	-22.7628	0.0727545	-163.513	-2.85385	(-0.05460091-0.01779131j)	-24.8178	0.0574264	-161.952	-2.8266	(-0.05067274-0.02984857j)	-24.6109	0.0588104	-149.5	-2.60927	(-0.04171547-0.02385105j)	-26.3657	0.0480526	-150.241	-2.6222	(-0.06182522-0.001297188j)	-24.1748	0.0618388	-178.798	-3.12061	(-0.07284072-0.008341158j)	-22.6959	0.0733167	-173.467
5.391	(-0.06709967-0.03151395j)	-22.5999	0.0741316	-154.842	-2.70251	(-0.06283948-0.01321732j)	-23.8473	0.0642145	-168.122	-2.93428	(-0.05595107-0.0242781j)	-24.2946	0.0609914	-156.543	-2.73219	(-0.0612183-0.04002586j)	-22.7167	0.073142	-146.822	-2.56254	(-0.06569356-0.02023524j)	-23.2559	0.0687394	-162.88	-2.84279	(-0.05130304-0.01800863j)	-25.2925	0.054372	-160.658	-2.80401	(-0.04675911-0.03112793j)	-25.0095	0.0561726	-146.348	-2.55425	(-0.03846611-0.02381717j)	-26.889	0.0452427	-148.235	-2.58719	(-0.05795251-0.002533972j)	-24.7303	0.0580079	-177.496	-3.0979	(-0.06826069-0.008845159j)	-23.2443	0.0688314	-172.617
5.3915	(-0.06376696-0.03097686j)	-22.988	0.0708928	-154.09	-2.68938	(-0.05993417-0.01380417j)	-24.222	0.0615033	-167.03	-2.91522	(-0.05194589-0.02317753j)	-24.9005	0.0568821	-155.954	-2.72191	(-0.05675086-0.03946796j)	-23.2072	0.0691258	-145.183	-2.53392	(-0.06206005-0.0207921j)	-23.6817	0.0654504	-161.478	-2.81831	(-0.04805012-0.01722912j)	-25.8408	0.0510456	-160.274	-2.79731	(-0.0447681-0.0301218j)	-25.3588	0.0539584	-146.066	-2.54933	(-0.03546759-0.0233128j)	-27.4438	0.0424433	-146.683	-2.5601	(-0.05449729-0.00046725870000000015j)	-25.2722	0.0544993	-179.509	-3.13302	(-0.06456294-0.00802568j)	-23.7337	0.0650599	-172.914
5.392	(-0.06136988-0.03032025j)	-23.2924	0.0684513	-153.708	-2.68271	(-0.05713136-0.01431079j)	-24.5982	0.0588964	-165.937	-2.89615	(-0.05022196-0.02360819j)	-25.1151	0.0554941	-154.823	-2.70217	(-0.05464943-0.03914999j)	-23.4493	0.0672256	-144.383	-2.51995	(-0.05981061-0.02007296j)	-24.0009	0.0630891	-161.448	-2.8178	(-0.04510606-0.01739953j)	-26.3129	0.0483456	-158.906	-2.77343	(-0.0421167-0.03037168j)	-25.6924	0.0519255	-144.203	-2.51682	(-0.03362931-0.02369646j)	-27.7148	0.0411394	-144.83	-2.52776	(-0.0507858-0.001449198j)	-25.8816	0.0508065	-178.365	-3.11306	(-0.06229479-0.007674621j)	-24.0455	0.0627658	-172.977
5.3925	(-0.05971669-0.0280199j)	-23.6139	0.0659636	-154.863	-2.70288	(-0.0544056-0.01097142j)	-25.114	0.0555008	-168.599	-2.9426	(-0.04671176-0.02208238j)	-25.7355	0.0516684	-154.698	-2.69999	(-0.05259865-0.03690884j)	-23.8417	0.0642564	-144.942	-2.52972	(-0.05683199-0.01835132j)	-24.4774	0.0597214	-162.104	-2.82926	(-0.04180554-0.0149309j)	-27.0539	0.0443918	-160.346	-2.79856	(-0.03832953-0.02870835j)	-26.3953	0.0478886	-143.167	-2.49874	(-0.02948819-0.02247349j)	-28.6182	0.0370757	-142.688	-2.49038	(-0.04868102+0.0004560021999999999j)	-26.2524	0.0486832	179.463	3.13223	(-0.06003614-0.004895726j)	-24.403	0.0602354	-175.338
5.393	(-0.05597343-0.0276382j)	-24.0928	0.0624251	-153.721	-2.68294	(-0.05100453-0.01083682j)	-25.6561	0.0521431	-168.005	-2.93224	(-0.04351207-0.02093087j)	-26.3238	0.0482846	-154.311	-2.69323	(-0.05054011-0.03476295j)	-24.2449	0.0613414	-145.479	-2.53908	(-0.05403224-0.01719538j)	-24.928	0.0567024	-162.347	-2.83348	(-0.03849653-0.0137023j)	-27.7735	0.0408624	-160.408	-2.79964	(-0.03697637-0.02783089j)	-26.6922	0.0462797	-143.032	-2.49639	(-0.02705415-0.02170369j)	-29.1974	0.034684	-141.262	-2.46549	(-0.04473725+0.0015283180000000003j)	-26.9815	0.0447633	178.043	3.10744	(-0.05573877-0.004597312j)	-25.0474	0.055928	-175.285
5.3935	(-0.05433294-0.02625181j)	-24.3875	0.0603426	-154.212	-2.6915	(-0.04809774-0.008621207j)	-26.2202	0.0488643	-169.838	-2.96423	(-0.04097281-0.01923874j)	-26.8848	0.0452648	-154.848	-2.7026	(-0.04713167-0.03479613j)	-24.6443	0.0585847	-143.562	-2.50564	(-0.05110056-0.01541637j)	-25.4532	0.0533754	-163.212	-2.84859	(-0.03559066-0.01405486j)	-28.3439	0.0382653	-158.451	-2.76549	(-0.0324485-0.02667916j)	-27.5333	0.0420081	-140.573	-2.45346	(-0.02410068-0.02050224j)	-29.9949	0.0316415	-139.612	-2.4367	(-0.04165937+0.003002798j)	-27.5832	0.0417675	175.877	3.06964	(-0.05382198-0.003150684j)	-25.3659	0.0539141	-176.65
5.394	(-0.05093503-0.02512399j)	-24.9139	0.0567943	-153.745	-2.68336	(-0.04547532-0.008128584j)	-26.7079	0.0461961	-169.866	-2.96471	(-0.03948706-0.01896785j)	-27.1692	0.0438065	-154.342	-2.69378	(-0.04522656-0.03329347j)	-25.0115	0.0561596	-143.641	-2.50702	(-0.04840574-0.01505815j)	-25.9009	0.0506938	-162.72	-2.84	(-0.03320124-0.01252543j)	-28.999	0.0354853	-159.331	-2.78084	(-0.02988439-0.02559935j)	-28.1012	0.0393498	-139.416	-2.43327	(-0.02254178-0.02062062j)	-30.2996	0.0305506	-137.549	-2.40068	(-0.03910905+0.003584572j)	-28.1181	0.039273	174.763	3.05019	(-0.05090837-0.001691973j)	-25.8594	0.0509365	-178.096
5.3945	(-0.04823003-0.02211952j)	-25.5046	0.0530604	-155.363	-2.71159	(-0.04228328-0.004838285j)	-27.4201	0.0425592	-173.472	-3.02766	(-0.03574993-0.01560143j)	-28.1774	0.0390059	-156.423	-2.7301	(-0.04073467-0.03142314j)	-25.7729	0.0514464	-142.353	-2.48453	(-0.04530722-0.01228029j)	-26.5688	0.046942	-164.835	-2.87691	(-0.03041687-0.009563329j)	-29.9283	0.0318848	-162.546	-2.83697	(-0.02859043-0.02323476j)	-28.6733	0.0368411	-140.9	-2.45917	(-0.01870919-0.01727304j)	-31.8816	0.0254635	-137.286	-2.39609	(-0.03727357+0.006076792j)	-28.4581	0.0377657	170.74	2.97998	(-0.04705369+0.0007693016j)	-26.547	0.04706	179.063
5.395	(-0.04603549-0.02120446j)	-25.9025	0.0506843	-155.269	-2.70995	(-0.04013682-0.003118313j)	-27.903	0.0402578	-175.557	-3.06406	(-0.03416488-0.01505868j)	-28.5574	0.0373363	-156.214	-2.72645	(-0.03913651-0.02949147j)	-26.1953	0.0490042	-143	-2.49582	(-0.04358313-0.01001706j)	-26.9901	0.0447195	-167.056	-2.91568	(-0.02862644-0.008175713j)	-30.5241	0.029771	-164.061	-2.8634	(-0.02583661-0.02160803j)	-29.4522	0.0336814	-140.093	-2.44509	(-0.01680931-0.0161234j)	-32.6559	0.023292	-136.193	-2.37702	(-0.0344714+0.007412753j)	-29.0545	0.0352594	167.864	2.92978	(-0.04435031+0.002435429j)	-27.049	0.0444171	176.857
5.3955	(-0.04280574-0.01768931j)	-26.6852	0.0463168	-157.547	-2.74972	(-0.03722098-0.0004929477999999999j)	-28.5835	0.0372242	-179.241	-3.12835	(-0.03098167-0.01182794j)	-29.587	0.0331627	-159.105	-2.7769	(-0.03701279-0.02640601j)	-26.8461	0.0454667	-144.495	-2.52191	(-0.04034556-0.007876672j)	-27.7216	0.0411073	-168.953	-2.94879	(-0.02529541-0.006499491j)	-31.6615	0.0261171	-165.59	-2.89009	(-0.02365651-0.01907828j)	-30.3451	0.030391	-141.115	-2.46292	(-0.01369052-0.01289816j)	-34.5125	0.0188094	-136.707	-2.38599	(-0.03101447+0.01051409j)	-29.6963	0.0327482	161.273	2.81475	(-0.04150732+0.00534333j)	-27.5661	0.0418498	172.665
5.396	(-0.04075693-0.01600773j)	-27.1729	0.0437878	-158.557	-2.76734	(-0.03471569+0.001876641j)	-29.1768	0.0347664	176.906	3.08759	(-0.02920924-0.009601236j)	-30.244	0.0307468	-161.804	-2.82401	(-0.03508906-0.02423028j)	-27.4032	0.0426421	-145.374	-2.53725	(-0.03709263-0.005315937j)	-28.526	0.0374716	-171.844	-2.99925	(-0.02254297-0.004966546j)	-32.7339	0.0230836	-167.575	-2.92474	(-0.02105473-0.01658067j)	-31.4374	0.0267996	-141.779	-2.47452	(-0.0117595-0.01140547j)	-35.7127	0.016382	-135.876	-2.37148	(-0.027742+0.01249956j)	-30.3346	0.0304279	155.745	2.71827	(-0.03925648+0.007266682j)	-27.9755	0.0399234	169.513
5.3965	(-0.04019026-0.01139063j)	-27.582	0.0417732	-164.176	-2.86542	(-0.03389501+0.004074365j)	-29.335	0.034139	173.146	3.02196	(-0.0279464-0.005436381j)	-30.9122	0.0284703	-168.992	-2.94946	(-0.03408694-0.02109409j)	-27.9402	0.0400859	-148.249	-2.58744	(-0.03660779-0.0006213132999999997j)	-28.7273	0.0366131	-179.028	-3.12462	(-0.02116344-0.0006263911j)	-33.4845	0.0211727	-178.305	-3.112	(-0.01966877-0.01418977j)	-32.3047	0.024253	-144.192	-2.51662	(-0.01115842-0.007977995j)	-37.2548	0.0137171	-144.436	-2.52089	(-0.02630056+0.01592675j)	-30.2439	0.030747	148.802	2.59709	(-0.03832604+0.0107077j)	-28.0037	0.0397937	164.39
5.397	(-0.0377529-0.008852595j)	-28.2285	0.0387769	-166.803	-2.91127	(-0.03067638+0.006894422j)	-30.0499	0.0314416	167.333	2.92052	(-0.0253889-0.004026977j)	-31.7992	0.0257063	-170.987	-2.98429	(-0.03120488-0.01908324j)	-28.7357	0.0365775	-148.552	-2.59273	(-0.03399062+0.0009286960999999999j)	-29.3696	0.0340033	178.435	3.11428	(-0.0190121+0.0014917530000000002j)	-34.3927	0.0190705	175.514	3.06329	(-0.01795851-0.01145334j)	-33.4324	0.0212999	-147.472	-2.57387	(-0.008217919-0.007200451j)	-39.2307	0.0109261	-138.776	-2.42209	(-0.02415963+0.01926123j)	-30.2014	0.0308979	141.436	2.46853	(-0.03541648+0.0129706j)	-28.4693	0.0377169	159.886
5.3975	(-0.03637965-0.007048314j)	-28.6228	0.0370561	-169.035	-2.95022	(-0.02860237+0.0100013j)	-30.371	0.0303005	160.727	2.80521	(-0.0227652-0.001518289j)	-32.8353	0.0228158	-176.184	-3.075	(-0.03062757-0.01609582j)	-29.2186	0.0345995	-152.277	-2.65773	(-0.03292048+0.00280099j)	-29.6194	0.0330394	175.137	3.05671	(-0.0173372+0.0035156370000000003j)	-35.0454	0.0176901	168.537	2.94153	(-0.0168567-0.008792561j)	-34.4194	0.019012	-152.453	-2.66081	(-0.006932387-0.003647986j)	-42.1207	0.00783363	-152.246	-2.65719	(-0.0224482+0.02072226j)	-30.2996	0.0305505	137.289	2.39615	(-0.03341912+0.01607032j)	-28.6167	0.0370822	154.318
5.398	(-0.03489224-0.002945212j)	-29.1146	0.0350163	-175.175	-3.05738	(-0.02773456+0.01309382j)	-30.2657	0.0306701	154.727	2.7005	(-0.02220503+0.0026844770000000002j)	-33.008	0.0223667	173.107	3.02128	(-0.02918888-0.01287778j)	-29.9233	0.0319034	-156.194	-2.72609	(-0.03127815+0.007867827j)	-29.8287	0.0322525	165.881	2.89516	(-0.01603707+0.007843641j)	-34.966	0.0178525	153.937	2.68671	(-0.015097-0.005495294j)	-35.8818	0.016066	-159.999	-2.7925	(-0.006128498-0.0006875922j)	-44.1986	0.00616695	-173.598	-3.02986	(-0.0216305+0.0250558j)	-29.6032	0.0331009	130.804	2.28296	(-0.03279997+0.01947507j)	-28.371	0.038146	149.3
5.3985	(-0.03378245+0.0003534810000000001j)	-29.4257	0.0337843	179.401	3.13113	(-0.02674413+0.01659906j)	-30.0402	0.0314766	148.174	2.58612	(-0.02082091+0.005896811j)	-33.2949	0.0216398	164.187	2.8656	(-0.02826151-0.008487991j)	-30.601	0.0295086	-163.283	-2.84983	(-0.02937919+0.01080268j)	-30.0885	0.0313023	159.812	2.78924	(-0.01466568+0.01057153j)	-34.8567	0.0180787	144.215	2.51702	(-0.0132467-0.002093222j)	-37.4507	0.0134111	-171.02	-2.98487	(-0.004518423+0.002691669j)	-45.5813	0.00525939	149.217	2.60433	(-0.01959759+0.02823392j)	-29.2767	0.0343689	124.765	2.17756	(-0.0305609+0.02393196j)	-28.2197	0.0388163	141.936
5.399	(-0.03162439+0.003945463j)	-29.9325	0.0318696	172.889	3.01747	(-0.02476272+0.01948844j)	-30.0305	0.0315118	141.797	2.47482	(-0.01931288+0.008852881j)	-33.4548	0.0212453	155.374	2.71178	(-0.02544024-0.006748589j)	-31.5942	0.0263201	-165.143	-2.88229	(-0.02730233+0.01365386j)	-30.3066	0.0305261	153.43	2.67787	(-0.01272666+0.01361186j)	-34.5936	0.0186347	133.075	2.3226	(-0.01140007+0.0003121777000000001j)	-38.8586	0.0114043	178.431	3.11422	(-0.0018383189999999997+0.005753786j)	-44.3788	0.00604032	107.719	1.88004	(-0.01610667+0.03175666j)	-28.9691	0.0356077	116.894	2.04018	(-0.0278323+0.02528682j)	-28.4953	0.037604	137.744
5.3995	(-0.03138769+0.008026262j)	-29.7897	0.0323977	165.656	2.89124	(-0.02424521+0.02402794j)	-29.3361	0.0341346	135.258	2.3607	(-0.01872476+0.01229507j)	-32.9948	0.0224006	146.71	2.56058	(-0.02565969-0.0022708070000000006j)	-31.7811	0.02576	-174.943	-3.05333	(-0.02683521+0.01723852j)	-29.9255	0.0318951	147.284	2.57059	(-0.01230898+0.01772594j)	-33.3188	0.0215805	124.776	2.17776	(-0.01150027+0.003984305j)	-38.2935	0.0121709	160.891	2.80808	(-0.001812888+0.008641995j)	-41.0807	0.0088301	101.848	1.77757	(-0.01607274+0.03473371j)	-28.3423	0.0382722	114.832	2.0042	(-0.02702527+0.03022499j)	-27.8412	0.0405452	131.801
5.4	(-0.03143976+0.01159822j)	-29.4963	0.0335109	159.751	2.78818	(-0.02310388+0.02731633j)	-28.928	0.0357767	130.224	2.27284	(-0.01874345+0.0147125j)	-32.4582	0.023828	141.87	2.4761	(-0.02683185+0.001400747j)	-31.4152	0.0268684	177.012	3.08944	(-0.02736304+0.021524j)	-29.1649	0.0348141	141.811	2.47507	(-0.01267968+0.02019766j)	-32.451	0.0238478	122.12	2.13139	(-0.01227044+0.008091838j)	-36.6546	0.0146984	146.597	2.5586	(-0.002303572+0.01363679j)	-37.1836	0.01383	99.5881	1.73814	(-0.01673039+0.03848412j)	-27.5426	0.0419635	113.496	1.98088	(-0.02886273+0.03390924j)	-27.027	0.0445297	130.404
5.4005	(-0.03075577+0.01386098j)	-29.4384	0.0337349	155.74	2.71817	(-0.02459762+0.0301974j)	-28.1904	0.0389477	129.165	2.25435	(-0.018928+0.01829911j)	-31.5919	0.0263273	135.968	2.37309	(-0.0259842+0.00501361j)	-31.5471	0.0264635	169.079	2.95099	(-0.02719833+0.02447898j)	-28.7323	0.0365919	138.012	2.40877	(-0.01237447+0.02412961j)	-31.335	0.0271176	117.15	2.04466	(-0.0119102+0.009738827j)	-36.2581	0.015385	140.728	2.45616	(-0.002115474+0.01551839j)	-36.1031	0.0156619	97.7627	1.70628	(-0.01612189+0.04111627j)	-27.0986	0.044164	111.41	1.94448	(-0.02726365+0.03717043j)	-26.7265	0.0460972	126.259
5.401	(-0.03215679+0.0173149j)	-28.7489	0.0365221	151.7	2.64766	(-0.0231565+0.03363875j)	-27.7786	0.0408386	124.543	2.17369	(-0.0197094+0.0223035j)	-30.5261	0.0297642	131.467	2.29453	(-0.02692648+0.008077492j)	-31.0222	0.0281119	163.302	2.85015	(-0.02706614+0.02674615j)	-28.3925	0.0380517	135.341	2.36214	(-0.01280065+0.02636319j)	-30.6607	0.0293066	115.899	2.02282	(-0.01211953+0.01250805j)	-35.1808	0.0174165	134.096	2.34042	(-0.001731507+0.01747687j)	-35.1083	0.0175624	95.6581	1.66955	(-0.01607165+0.04459891j)	-26.4833	0.0474063	109.817	1.91667	(-0.02745619+0.04025675j)	-26.2444	0.0487283	124.295
5.4015	(-0.03216469+0.02079865j)	-28.3353	0.0383034	147.112	2.56759	(-0.02394802+0.03589811j)	-27.2998	0.043153	123.708	2.15911	(-0.02040009+0.02517781j)	-29.7878	0.032405	129.016	2.25175	(-0.02731191+0.01023011j)	-30.7028	0.029165	159.466	2.7832	(-0.02718265+0.03086066j)	-27.7179	0.0411251	131.374	2.29291	(-0.01245447+0.0291696j)	-29.9741	0.0317172	113.121	1.97433	(-0.01299681+0.01573389j)	-33.8041	0.0204077	129.558	2.26121	(-0.002362933+0.02045342j)	-33.7271	0.0205895	96.59	1.68581	(-0.01560613+0.04707313j)	-26.0917	0.0495926	108.342	1.89092	(-0.02799114+0.04402919j)	-25.651	0.0521735	122.446
5.402	(-0.03354325+0.02489915j)	-27.5818	0.0417746	143.414	2.50304	(-0.02505264+0.04026754j)	-26.4799	0.0474248	121.888	2.12735	(-0.02064343+0.02854093j)	-29.0632	0.0352241	125.878	2.19698	(-0.02853547+0.01421483j)	-29.9296	0.03188	153.52	2.67943	(-0.02766525+0.03398946j)	-27.1655	0.0438252	129.143	2.25398	(-0.01288833+0.03182893j)	-29.2842	0.0343393	112.044	1.95554	(-0.01368992+0.01963178j)	-32.4198	0.0239337	124.889	2.17973	(-0.003831259+0.02449165j)	-32.1146	0.0247895	98.8908	1.72597	(-0.01630899+0.05062033j)	-25.4846	0.0531827	107.858	1.88248	(-0.02824103+0.04690079j)	-25.2328	0.0547471	121.054
5.4025	(-0.03393835+0.02769864j)	-27.1692	0.0438067	140.781	2.45708	(-0.0247886+0.04335144j)	-26.0313	0.0499382	119.761	2.09023	(-0.0200412+0.03203345j)	-28.4534	0.0377861	122.031	2.12985	(-0.02783236+0.0182818j)	-29.5512	0.0332996	146.701	2.56041	(-0.02813387+0.03751582j)	-26.5778	0.046893	126.867	2.21425	(-0.01397167+0.03634731j)	-28.192	0.0389401	111.026	1.93778	(-0.0136146+0.02363138j)	-31.2854	0.0272727	119.947	2.09347	(-0.003350922+0.02683949j)	-31.3573	0.0270479	97.1166	1.695	(-0.01634413+0.05480221j)	-24.854	0.0571875	106.607	1.86064	(-0.02874869+0.05024878j)	-24.7477	0.0578915	119.775
5.403	(-0.03468288+0.03150392j)	-26.5849	0.0468551	137.75	2.40419	(-0.02500658+0.04570078j)	-25.6641	0.052095	118.687	2.07147	(-0.02153721+0.03468079j)	-27.7817	0.0408241	121.841	2.12652	(-0.02980042+0.02106247j)	-28.756	0.0364924	144.748	2.52633	(-0.03028488+0.04125369j)	-25.8186	0.0511766	126.283	2.20405	(-0.01374508+0.03934843j)	-27.6014	0.04168	109.255	1.90686	(-0.01470791+0.02705177j)	-30.2314	0.0307916	118.533	2.06879	(-0.004632909+0.0298467j)	-30.3987	0.0302041	98.8232	1.72479	(-0.01733986+0.05655227j)	-24.5608	0.0591509	107.046	1.86831	(-0.02835106+0.05347772j)	-24.3609	0.0605281	117.93
5.4035	(-0.03520305+0.03382743j)	-26.2278	0.0488216	136.142	2.37612	(-0.02590254+0.05017719j)	-24.9639	0.0564685	117.304	2.04734	(-0.02147248+0.03778165j)	-27.2388	0.0434571	119.611	2.0876	(-0.03133214+0.02511406j)	-27.9252	0.0401549	141.286	2.46591	(-0.03155512+0.04419714j)	-25.3031	0.0543057	125.525	2.19083	(-0.01562384+0.04215435j)	-26.9441	0.0449566	110.336	1.92573	(-0.01682276+0.02892973j)	-29.5081	0.0334654	120.178	2.0975	(-0.005683073+0.03342606j)	-29.3945	0.0339057	99.6491	1.73921	(-0.01830866+0.05983355j)	-24.0724	0.062572	107.014	1.86774	(-0.03012566+0.05636383j)	-23.8887	0.0639096	118.124
5.404	(-0.03804315+0.03696877j)	-25.5068	0.0530469	135.821	2.37052	(-0.02867308+0.05262451j)	-24.4473	0.059929	118.584	2.06969	(-0.02426563+0.03964093j)	-26.655	0.0464782	121.472	2.12009	(-0.03321929+0.0267544j)	-27.4009	0.0426535	141.152	2.46358	(-0.03357382+0.046473j)	-24.8321	0.0573319	125.846	2.19642	(-0.01818779+0.04424144j)	-26.4052	0.0478341	112.348	1.96084	(-0.01944779+0.03177485j)	-28.5766	0.037254	121.469	2.12003	(-0.008016226+0.0352827j)	-28.8302	0.0361819	102.8	1.7942	(-0.02107956+0.0624694j)	-23.6183	0.0659301	108.646	1.89624	(-0.0316752+0.05932026j)	-23.4465	0.0672474	118.101
5.4045	(-0.03932298+0.04111179j)	-24.8993	0.05689	133.726	2.33396	(-0.03093088+0.05476831j)	-24.0271	0.062899	119.456	2.0849	(-0.02514519+0.04314498j)	-26.0314	0.0499377	120.234	2.09848	(-0.03511918+0.03004922j)	-26.7034	0.0462203	139.449	2.43384	(-0.03365424+0.04970181j)	-24.4335	0.060024	124.103	2.166	(-0.01862088+0.04714371j)	-25.9019	0.0506879	111.553	1.94697	(-0.01977623+0.03478833j)	-27.9552	0.0400166	119.617	2.08771	(-0.01009875+0.03893208j)	-27.911	0.0402205	104.542	1.8246	(-0.02128999+0.06482655j)	-23.3201	0.068233	108.181	1.88811	(-0.03334996+0.06173165j)	-23.0777	0.0701642	118.38
5.405	(-0.04109856+0.042209j)	-24.5958	0.0589126	134.236	2.34287	(-0.03128589+0.05830065j)	-23.5875	0.0661647	118.219	2.06332	(-0.02826502+0.0457165j)	-25.3927	0.0537486	121.727	2.12454	(-0.03678014+0.03224059j)	-26.212	0.0489105	138.763	2.42187	(-0.03574109+0.05264883j)	-23.9262	0.0636343	124.171	2.16719	(-0.02010012+0.04953038j)	-25.4405	0.0534535	112.088	1.9563	(-0.02223644+0.03654601j)	-27.3753	0.0427793	121.318	2.11741	(-0.01176983+0.04058019j)	-27.4829	0.0422526	106.174	1.85309	(-0.02339889+0.06853824j)	-22.8025	0.0724224	108.85	1.89979	(-0.03475235+0.06455745j)	-22.6959	0.0733171	118.294
5.4055	(-0.04264035+0.04551071j)	-24.1011	0.0623652	133.135	2.32364	(-0.03329157+0.05940821j)	-23.337	0.0681004	119.266	2.08158	(-0.03015723+0.04763033j)	-24.9783	0.0563747	122.34	2.13524	(-0.03868927+0.03399359j)	-25.7636	0.0515017	138.696	2.42071	(-0.03791808+0.0543327j)	-23.5755	0.0662557	124.911	2.1801	(-0.02246712+0.05211395j)	-24.9206	0.0567506	113.322	1.97784	(-0.0238998+0.03823785j)	-26.9179	0.0450925	122.007	2.12942	(-0.01468896+0.0422895j)	-26.9807	0.0447679	109.154	1.9051	(-0.02486915+0.06927619j)	-22.6619	0.0736048	109.747	1.91545	(-0.03732936+0.06687355j)	-22.3169	0.0765869	119.171
5.406	(-0.04497712+0.04734064j)	-23.7017	0.0652999	133.533	2.3306	(-0.03485445+0.0617802j)	-22.9829	0.070934	119.43	2.08445	(-0.0321748+0.05004287j)	-24.5106	0.0594938	122.739	2.1422	(-0.04095898+0.03752954j)	-25.1059	0.0555527	137.502	2.39986	(-0.03940137+0.05730125j)	-23.1552	0.0695406	124.513	2.17316	(-0.02471559+0.0540507j)	-24.5194	0.0594335	114.573	1.99968	(-0.02691109+0.04086348j)	-26.2087	0.0489288	123.367	2.15317	(-0.01476642+0.04517198j)	-26.4617	0.0475243	108.102	1.88674	(-0.02680766+0.07188033j)	-22.3022	0.0767166	110.453	1.92777	(-0.03850836+0.06944437j)	-22.0029	0.0794066	119.009
5.4065	(-0.04678566+0.04887344j)	-23.3937	0.0676573	133.75	2.33437	(-0.03683082+0.06491187j)	-22.5414	0.0746328	119.57	2.0869	(-0.03433904+0.05209874j)	-24.0967	0.0623975	123.389	2.15355	(-0.04463829+0.03908587j)	-24.5342	0.059332	138.794	2.42242	(-0.04093556+0.05771599j)	-23.0043	0.0707591	125.346	2.18771	(-0.02681476+0.05549235j)	-24.204	0.0616314	115.791	2.02093	(-0.02872286+0.04212945j)	-25.8504	0.0509891	124.285	2.16919	(-0.01755482+0.04550608j)	-26.2361	0.0487747	111.095	1.93897	(-0.0275215+0.07269001j)	-22.1887	0.0777256	110.737	1.93273	(-0.04044909+0.07104219j)	-21.7502	0.0817504	119.656
5.407	(-0.04973355+0.05205221j)	-22.8543	0.0719921	133.695	2.33342	(-0.04038393+0.06573971j)	-22.253	0.0771529	121.562	2.12166	(-0.03720655+0.05377555j)	-23.6895	0.0653922	124.679	2.17606	(-0.046772+0.04076963j)	-24.1456	0.0620466	138.922	2.42465	(-0.04406283+0.06050701j)	-22.5161	0.0748507	126.063	2.20022	(-0.02940203+0.05754306j)	-23.7927	0.0646195	117.065	2.04317	(-0.03154555+0.04419112j)	-25.3048	0.0542953	125.521	2.19075	(-0.02084089+0.04759638j)	-25.6868	0.0519592	113.647	1.98351	(-0.0298535+0.07468349j)	-21.8917	0.0804292	111.788	1.95107	(-0.04290158+0.07371692j)	-21.3818	0.085292	120.198
5.4075	(-0.05332937+0.05199588j)	-22.559	0.0744822	135.725	2.36885	(-0.04204509+0.06736195j)	-22.0029	0.0794067	121.971	2.1288	(-0.04035821+0.05469232j)	-23.3535	0.0679708	126.424	2.20652	(-0.0502256+0.04294366j)	-23.5984	0.0660815	139.469	2.43419	(-0.04793666+0.06253393j)	-22.0702	0.0787935	127.473	2.22482	(-0.03228467+0.05870939j)	-23.4784	0.0670007	118.807	2.07357	(-0.03442956+0.04463511j)	-24.9789	0.056371	127.645	2.22783	(-0.02471354+0.04875964j)	-25.2458	0.054665	116.878	2.0399	(-0.03323748+0.07657318j)	-21.5688	0.0834756	113.464	1.98032	(-0.04567463+0.07458264j)	-21.1641	0.0874571	121.483
5.408	(-0.05599037+0.05392772j)	-22.1874	0.0777375	136.075	2.37496	(-0.04483481+0.06901217j)	-21.6923	0.0822973	123.01	2.14694	(-0.04199653+0.05623628j)	-23.0749	0.0701871	126.752	2.21224	(-0.05301087+0.04335441j)	-23.2885	0.0684818	140.722	2.45607	(-0.04980374+0.06354758j)	-21.8584	0.0807385	128.087	2.23553	(-0.0353861+0.06050117j)	-23.0869	0.0700897	120.323	2.10003	(-0.03732543+0.04708561j)	-24.4246	0.0600853	128.404	2.24108	(-0.02694242+0.04934899j)	-25.0015	0.0562247	118.633	2.07053	(-0.03620366+0.07767497j)	-21.3406	0.0856978	114.99	2.00695	(-0.04745092+0.07549553j)	-20.9957	0.0891693	122.15
5.4085	(-0.05879035+0.05451155j)	-21.9194	0.0801737	137.163	2.39394	(-0.04769124+0.06909075j)	-21.5193	0.0839523	124.616	2.17496	(-0.04472582+0.05617885j)	-22.8765	0.0718085	128.524	2.24317	(-0.05544072+0.04348003j)	-23.0415	0.070457	141.894	2.47652	(-0.05288727+0.06359181j)	-21.6488	0.0827102	129.749	2.26455	(-0.03738764+0.05967657j)	-23.0459	0.0704211	122.067	2.13048	(-0.03920375+0.04597201j)	-24.3766	0.0604182	130.457	2.2769	(-0.02904702+0.04910259j)	-24.8748	0.0570508	120.607	2.10499	(-0.03879987+0.07713901j)	-21.275	0.0863473	116.702	2.03683	(-0.0493292+0.07518075j)	-20.9229	0.0899195	123.271
5.409	(-0.06111205+0.05581343j)	-21.6432	0.0827636	137.595	2.40148	(-0.04990659+0.06961443j)	-21.3449	0.0856553	125.637	2.19277	(-0.04755068+0.05712914j)	-22.5768	0.074329	129.772	2.26495	(-0.05771989+0.04611241j)	-22.6297	0.0738779	141.379	2.46752	(-0.05510098+0.0653813j)	-21.3603	0.0855034	130.123	2.27107	(-0.04078206+0.06122231j)	-22.6669	0.0735619	123.669	2.15843	(-0.04235573+0.04801276j)	-23.873	0.0640253	131.418	2.29368	(-0.03263238+0.05041349j)	-24.4293	0.0600532	122.915	2.14527	(-0.04097381+0.07983761j)	-20.9405	0.0897379	117.168	2.04496	(-0.05295396+0.07737712j)	-20.5594	0.0937621	124.386
5.4095	(-0.06413203+0.05570614j)	-21.417	0.0849476	139.022	2.42639	(-0.05235618+0.07029401j)	-21.145	0.0876494	126.679	2.21097	(-0.05135406+0.05791061j)	-22.2251	0.0774008	131.566	2.29626	(-0.06109938+0.04660111j)	-22.2879	0.0768427	142.667	2.49001	(-0.0579651+0.0666291j)	-21.0794	0.0883142	131.022	2.28677	(-0.04284756+0.06194095j)	-22.4622	0.0753166	124.673	2.17596	(-0.04568102+0.04912658j)	-23.4677	0.0670834	132.919	2.31987	(-0.0339598+0.05088232j)	-24.2686	0.0611742	123.72	2.15932	(-0.04299778+0.07903168j)	-20.9179	0.0899712	118.549	2.06907	(-0.05507483+0.07779702j)	-20.4165	0.0953185	125.296
5.41	(-0.0655524+0.05570392j)	-21.3077	0.0860235	139.643	2.43724	(-0.0552291+0.07026138j)	-20.9762	0.0893695	128.169	2.23697	(-0.05212077+0.05767178j)	-22.1878	0.0777342	132.106	2.30568	(-0.06339593+0.04607415j)	-22.117	0.0783701	143.992	2.51313	(-0.06006065+0.06510215j)	-21.0538	0.0885752	132.693	2.31594	(-0.04559894+0.06026691j)	-22.4326	0.0755736	127.112	2.21852	(-0.04741964+0.04801378j)	-23.4161	0.0674829	134.643	2.34997	(-0.03732563+0.05007938j)	-24.0881	0.0624592	126.698	2.2113	(-0.04546696+0.07864955j)	-20.8339	0.090846	120.032	2.09495	(-0.05723931+0.07760458j)	-20.3157	0.0964303	126.412
5.4105	(-0.06769022+0.05594606j)	-21.1284	0.0878176	140.426	2.4509	(-0.05671068+0.07028748j)	-20.885	0.090313	128.898	2.24969	(-0.05591238+0.05735473j)	-21.9275	0.0800984	134.27	2.34346	(-0.06589223+0.04674116j)	-21.8532	0.0807869	144.65	2.52461	(-0.06147692+0.06508926j)	-20.9604	0.0895322	133.365	2.32766	(-0.04742543+0.06164962j)	-22.1826	0.0777808	127.57	2.22652	(-0.05057579+0.04719095j)	-23.2013	0.0691729	136.983	2.3908	(-0.04079557+0.05002745j)	-23.8017	0.0645525	129.196	2.2549	(-0.04779778+0.07765143j)	-20.8017	0.0911832	121.614	2.12257	(-0.05871641+0.07727169j)	-20.2602	0.0970491	127.23
5.411	(-0.07173453+0.05617003j)	-20.8087	0.0911094	141.938	2.47729	(-0.06051923+0.07002354j)	-20.6723	0.092552	130.836	2.28352	(-0.05846699+0.0569725j)	-21.7625	0.0816349	135.742	2.36914	(-0.0695455+0.04626293j)	-21.5634	0.0835275	146.367	2.55459	(-0.06541392+0.06591062j)	-20.6433	0.0928611	134.783	2.35241	(-0.05047906+0.06156205j)	-21.9805	0.0796117	129.351	2.2576	(-0.05354001+0.04774655j)	-22.8851	0.0717375	138.274	2.41333	(-0.04368657+0.04964015j)	-23.5925	0.0661261	131.35	2.29249	(-0.05051784+0.07796672j)	-20.6395	0.0929024	122.941	2.14572	(-0.06266347+0.0772255j)	-20.0478	0.0994509	129.057
5.4115	(-0.07422832+0.05601034j)	-20.6313	0.0929893	142.963	2.49517	(-0.06278571+0.06928237j)	-20.5838	0.0934992	132.184	2.30704	(-0.06146792+0.05734125j)	-21.5081	0.0840614	136.989	2.39091	(-0.07347951+0.04500167j)	-21.2934	0.0861649	148.515	2.59208	(-0.06719749+0.06430981j)	-20.6292	0.0930121	136.258	2.37815	(-0.05339869+0.06040901j)	-21.8704	0.0806267	131.475	2.29467	(-0.05649828+0.04729781j)	-22.6527	0.0736827	140.065	2.4446	(-0.04570181+0.04838981j)	-23.5357	0.06656	133.364	2.32763	(-0.05270295+0.07730415j)	-20.5782	0.0935603	124.285	2.16918	(-0.06455816+0.07675222j)	-19.9746	0.100293	130.068
5.412	(-0.07569514+0.05599388j)	-20.5232	0.0941545	143.509	2.5047	(-0.06273397+0.06810881j)	-20.668	0.0925978	132.648	2.31514	(-0.06301021+0.05597655j)	-21.4852	0.0842832	138.383	2.41524	(-0.07440814+0.04558175j)	-21.1837	0.0872598	148.509	2.59197	(-0.06881237+0.06376692j)	-20.5545	0.0938156	137.179	2.39423	(-0.05474528+0.05929048j)	-21.8626	0.0806995	132.718	2.31636	(-0.05710731+0.04545388j)	-22.7349	0.0729884	141.482	2.46933	(-0.04700226+0.04728487j)	-23.5212	0.0666714	134.828	2.3532	(-0.05472383+0.07733059j)	-20.4698	0.094735	125.286	2.18665	(-0.06643376+0.0759055j)	-19.9246	0.100872	131.193
5.4125	(-0.07776414+0.05474964j)	-20.436	0.0951041	144.853	2.52816	(-0.06546714+0.06693026j)	-20.5722	0.0936248	134.367	2.34514	(-0.06422224+0.05458342j)	-21.4851	0.0842843	139.638	2.43715	(-0.0768832+0.04329326j)	-21.0872	0.0882345	150.616	2.62874	(-0.07148568+0.06263564j)	-20.4415	0.0950443	138.775	2.42208	(-0.05650341+0.05754554j)	-21.8681	0.0806482	134.476	2.34706	(-0.059927+0.04426893j)	-22.5563	0.0745049	143.546	2.50535	(-0.04873379+0.04718911j)	-23.3707	0.0678365	135.923	2.3723	(-0.05452397+0.07553662j)	-20.6155	0.0931592	125.823	2.19602	(-0.06712583+0.07506981j)	-19.939	0.100704	131.802
5.413	(-0.08122733+0.05271848j)	-20.2793	0.0968355	147.015	2.5659	(-0.0689116+0.0657493j)	-20.4231	0.0952459	136.345	2.37967	(-0.06637323+0.05251367j)	-21.449	0.084635	141.649	2.47225	(-0.08000223+0.04235999j)	-20.8647	0.0905247	152.099	2.65464	(-0.07454246+0.06119451j)	-20.3145	0.0964435	140.616	2.45422	(-0.06002094+0.05659566j)	-21.6713	0.082496	136.682	2.38556	(-0.0632163+0.04337107j)	-22.3082	0.0766639	145.547	2.54027	(-0.0522364+0.04475608j)	-23.2498	0.0687877	139.41	2.43316	(-0.05881107+0.073501j)	-20.5251	0.0941336	128.665	2.24562	(-0.07059007+0.07259871j)	-19.8913	0.10126	134.196
5.4135	(-0.08214997+0.05234909j)	-20.2278	0.0974117	147.493	2.57424	(-0.07141726+0.06497359j)	-20.3049	0.0965505	137.705	2.4034	(-0.06952879+0.05205563j)	-21.224	0.0868564	143.178	2.49893	(-0.08141121+0.04176763j)	-20.7715	0.0915004	152.84	2.66756	(-0.07563128+0.05961397j)	-20.3274	0.0963012	141.754	2.47408	(-0.06240718+0.05560316j)	-21.5575	0.0835845	138.3	2.41379	(-0.06430088+0.04210857j)	-22.2858	0.0768618	146.781	2.5618	(-0.05378222+0.04440013j)	-23.1302	0.0697417	140.458	2.45146	(-0.05958862+0.07422203j)	-20.4289	0.0951825	128.759	2.24727	(-0.07180583+0.07282458j)	-19.8049	0.102272	134.596
5.414	(-0.08471985+0.05094094j)	-20.1	0.0988556	148.982	2.60023	(-0.07225315+0.06299111j)	-20.3676	0.0958561	138.918	2.42457	(-0.07091185+0.05056722j)	-21.2001	0.087095	144.507	2.52213	(-0.08306897+0.04033343j)	-20.6919	0.0923431	154.102	2.68958	(-0.07778735+0.06005551j)	-20.1513	0.0982728	142.33	2.48413	(-0.06346224+0.05338401j)	-21.6258	0.0829295	139.93	2.44223	(-0.06800634+0.04040898j)	-22.0358	0.0791059	149.281	2.60545	(-0.05635097+0.04079522j)	-23.1518	0.0695678	144.097	2.51497	(-0.06272624+0.07153586j)	-20.4326	0.0951418	131.246	2.29067	(-0.07353246+0.07008174j)	-19.8638	0.10158	136.376
5.4145	(-0.08604696+0.04848937j)	-20.1076	0.0987689	150.598	2.62843	(-0.07370181+0.06078006j)	-20.3971	0.095531	140.488	2.45199	(-0.07302424+0.04873697j)	-21.1307	0.0877943	146.281	2.55308	(-0.08420293+0.03802884j)	-20.6873	0.0923922	155.694	2.71738	(-0.07932797+0.05499664j)	-20.307	0.0965275	145.267	2.53539	(-0.06396154+0.05071828j)	-21.763	0.0816298	141.587	2.47117	(-0.0687485+0.03815089j)	-22.0888	0.0786247	150.973	2.63497	(-0.05788937+0.03854212j)	-23.1545	0.0695462	146.345	2.5542	(-0.06217834+0.06843152j)	-20.6808	0.0924609	132.259	2.30835	(-0.07502926+0.06800336j)	-19.8911	0.101261	137.812
5.415	(-0.08732638+0.0458623j)	-20.1192	0.0986369	152.292	2.658	(-0.07412487+0.0586592j)	-20.4889	0.0945272	141.643	2.47214	(-0.07367253+0.04580149j)	-21.2347	0.0867492	148.131	2.58538	(-0.08611465+0.03602732j)	-20.598	0.0933472	157.297	2.74536	(-0.08061166+0.05503679j)	-20.2103	0.0976078	145.677	2.54254	(-0.06476226+0.04866144j)	-21.8296	0.0810067	143.079	2.49721	(-0.07008377+0.03574672j)	-22.0834	0.0786738	152.976	2.66993	(-0.0595804+0.03781517j)	-23.0279	0.0705678	147.597	2.57605	(-0.06401481+0.06701299j)	-20.6608	0.0926749	133.689	2.33332	(-0.0760029+0.06616468j)	-19.9335	0.100768	138.959
5.4155	(-0.08809668+0.0444134j)	-20.1173	0.0986589	153.245	2.67464	(-0.07609726+0.05722914j)	-20.4259	0.0952154	143.055	2.49678	(-0.07587318+0.04400996j)	-21.1387	0.0877133	149.884	2.61597	(-0.08792229+0.03420091j)	-20.5061	0.09434	158.744	2.77061	(-0.08166492+0.05219531j)	-20.2717	0.0969201	147.416	2.57289	(-0.06764927+0.04641033j)	-21.7196	0.0820387	145.548	2.5403	(-0.07177371+0.03448947j)	-21.9784	0.0796303	154.334	2.69364	(-0.06092058+0.03520312j)	-23.0534	0.0703603	149.978	2.61762	(-0.06529837+0.06410459j)	-20.771	0.0915056	135.529	2.36542	(-0.07722662+0.06371435j)	-19.9898	0.100117	140.476
5.416	(-0.08802459+0.04207944j)	-20.2141	0.0975654	154.45	2.69567	(-0.0760818+0.05438448j)	-20.5818	0.0935206	144.442	2.52099	(-0.07565228+0.04118803j)	-21.2961	0.0861378	151.434	2.64303	(-0.08818936+0.03192608j)	-20.5568	0.0937904	160.099	2.79425	(-0.08163204+0.05049193j)	-20.3559	0.0959855	148.262	2.58766	(-0.06771471+0.04447833j)	-21.8286	0.0810161	146.701	2.56042	(-0.07124487+0.03151682j)	-22.1687	0.0779047	156.137	2.7251	(-0.06105818+0.03206145j)	-23.2275	0.068964	152.296	2.65807	(-0.06395365+0.06303545j)	-20.9347	0.0897972	135.414	2.36342	(-0.07793985+0.06155033j)	-20.0599	0.099313	141.701
5.4165	(-0.08906415+0.04133149j)	-20.1589	0.0981871	155.106	2.7071	(-0.07638797+0.05218121j)	-20.6763	0.0925095	145.663	2.54229	(-0.07608227+0.03954934j)	-21.3356	0.0857477	152.534	2.66221	(-0.08788084+0.02978993j)	-20.6497	0.0927927	161.274	2.81477	(-0.0815817+0.04713223j)	-20.5173	0.0942179	149.984	2.61771	(-0.06692816+0.0427434j)	-22.0022	0.0794127	147.436	2.57324	(-0.07181996+0.029736j)	-22.188	0.0777325	157.509	2.74905	(-0.06197442+0.03007157j)	-23.2375	0.0688849	154.116	2.68983	(-0.06519313+0.05918795j)	-21.1051	0.0880532	137.764	2.40444	(-0.07667278+0.05949305j)	-20.2603	0.0970471	142.191
5.417	(-0.09012015+0.03798476j)	-20.1934	0.0977982	157.145	2.7427	(-0.07649408+0.05013258j)	-20.7755	0.0914583	146.76	2.56145	(-0.07675432+0.03679643j)	-21.3995	0.0851188	154.387	2.69456	(-0.09008209+0.02799374j)	-20.5069	0.0943315	162.737	2.8403	(-0.08234176+0.04587033j)	-20.5138	0.0942563	150.879	2.63334	(-0.06793497+0.03990571j)	-22.0707	0.0787885	149.57	2.61048	(-0.07359879+0.02663398j)	-22.1281	0.0782697	160.106	2.79437	(-0.06237838+0.02747159j)	-23.3294	0.0681597	156.231	2.72675	(-0.06536822+0.0580858j)	-21.1651	0.0874469	138.376	2.41512	(-0.07851547+0.05735353j)	-20.2438	0.0972322	143.853
5.4175	(-0.09082022+0.03485478j)	-20.2396	0.0972788	159.004	2.77515	(-0.07753186+0.04744451j)	-20.8291	0.0908965	148.536	2.59244	(-0.07699594+0.03369088j)	-21.5098	0.0840443	156.367	2.72913	(-0.09007463+0.02464567j)	-20.5944	0.0933855	164.698	2.87452	(-0.08292985+0.04365684j)	-20.5634	0.0937192	152.236	2.65702	(-0.06972024+0.03723545j)	-22.043	0.0790404	151.895	2.65106	(-0.07430009+0.02479556j)	-22.1216	0.0783283	161.545	2.81949	(-0.06350673+0.02394366j)	-23.3664	0.0678705	159.342	2.78105	(-0.06536662+0.05413857j)	-21.4244	0.0848751	140.367	2.44987	(-0.07855336+0.05393039j)	-20.4196	0.0952844	145.529
5.418	(-0.08968675+0.03370595j)	-20.3717	0.0958113	159.403	2.7821	(-0.07625483+0.04455816j)	-21.0789	0.0883189	149.701	2.61277	(-0.07500172+0.03173959j)	-21.7831	0.0814411	157.063	2.74126	(-0.08937033+0.02292642j)	-20.6993	0.0922642	165.612	2.89047	(-0.08217255+0.04090544j)	-20.744	0.091791	153.536	2.67971	(-0.06782885+0.03516767j)	-22.3377	0.0764037	152.594	2.66327	(-0.07302107+0.02190768j)	-22.3567	0.0762366	163.3	2.85012	(-0.06225006+0.02237344j)	-23.5896	0.0661486	160.231	2.79656	(-0.06566422+0.05259611j)	-21.5008	0.0841317	141.306	2.46625	(-0.07649064+0.05265902j)	-20.643	0.0928644	145.455
5.4185	(-0.08944921+0.03072163j)	-20.4842	0.0945779	161.045	2.81076	(-0.07653377+0.04213412j)	-21.1732	0.0873653	151.166	2.63834	(-0.0766471+0.02936796j)	-21.7152	0.0820808	159.035	2.77569	(-0.08932083+0.02017096j)	-20.7649	0.0915701	167.275	2.91949	(-0.08149128+0.03890105j)	-20.8862	0.0903002	154.482	2.69622	(-0.06823008+0.03197965j)	-22.458	0.0753528	154.887	2.70329	(-0.07379227+0.01898129j)	-22.3615	0.0761944	165.575	2.88982	(-0.06260621+0.01909474j)	-23.6814	0.0654534	163.038	2.84556	(-0.06521518+0.04897798j)	-21.7706	0.0815589	143.093	2.49744	(-0.07548753+0.05060508j)	-20.8306	0.0908804	146.163
5.419	(-0.08803181+0.02840574j)	-20.677	0.0925013	162.116	2.82946	(-0.07507797+0.0403252j)	-21.3889	0.0852222	151.759	2.6487	(-0.07524161+0.02734213j)	-21.9322	0.0800556	160.029	2.79304	(-0.08696575+0.01802825j)	-21.0303	0.0888147	168.288	2.93719	(-0.08000228+0.03563154j)	-21.1521	0.0875784	155.993	2.72259	(-0.06734169+0.02894198j)	-22.6982	0.0732976	156.743	2.73568	(-0.07209308+0.01696893j)	-22.608	0.0740632	166.755	2.91043	(-0.0614198+0.0170091j)	-23.9129	0.0637315	164.521	2.87143	(-0.06251827+0.0465458j)	-22.1645	0.0779426	143.332	2.50161	(-0.07415331+0.04733302j)	-21.1131	0.0879723	147.449
5.4195	(-0.08796654+0.02520348j)	-20.771	0.0915059	164.012	2.86256	(-0.07421323+0.03657738j)	-21.6459	0.0827376	153.763	2.68367	(-0.07519954+0.02337598j)	-22.0751	0.078749	162.732	2.84021	(-0.08903969+0.01457558j)	-20.8935	0.0902248	170.703	2.97933	(-0.07982665+0.0326957j)	-21.2835	0.086263	157.727	2.75285	(-0.06642455+0.02549985j)	-22.9564	0.071151	158.999	2.77505	(-0.07180551+0.01265653j)	-22.744	0.0729124	170.004	2.96712	(-0.06091977+0.01308018j)	-24.1091	0.0623082	167.882	2.93009	(-0.06266166+0.04285088j)	-22.3938	0.0759123	145.634	2.54179	(-0.07381218+0.04387082j)	-21.3236	0.0858655	149.275
5.42	(-0.08669055+0.02329815j)	-20.9377	0.0897667	164.957	2.87905	(-0.07361536+0.03482461j)	-21.7836	0.0814369	154.683	2.69973	(-0.07347407+0.02194678j)	-22.3062	0.0766818	163.369	2.85133	(-0.08725954+0.01371752j)	-21.0777	0.0883312	171.066	2.98567	(-0.08000064+0.0318892j)	-21.2977	0.0861221	158.267	2.76228	(-0.06476294+0.02422463j)	-23.2047	0.0691453	159.492	2.78365	(-0.07170612+0.01162355j)	-22.7762	0.0726421	170.792	2.98089	(-0.06064054+0.01103097j)	-24.2034	0.0616357	169.69	2.96165	(-0.06163068+0.04070732j)	-22.6317	0.0738609	146.555	2.55787	(-0.07323983+0.04231822j)	-21.454	0.0845867	149.981
5.4205	(-0.08489646+0.02245363j)	-21.1286	0.0878156	165.185	2.88303	(-0.07091798+0.0322428j)	-22.1689	0.0779035	155.551	2.71488	(-0.07225331+0.01973664j)	-22.5103	0.0749004	164.722	2.87494	(-0.0859953+0.01188532j)	-21.2283	0.0868127	172.131	3.00425	(-0.07666266+0.02908218j)	-21.7244	0.0819935	159.226	2.77901	(-0.06382362+0.02160713j)	-23.4291	0.0673819	161.297	2.81516	(-0.06921744+0.009545301j)	-23.1139	0.0698725	172.148	3.00455	(-0.05817977+0.009597654j)	-24.588	0.0589661	170.633	2.9781	(-0.05939674+0.0396479j)	-22.9244	0.0714138	146.277	2.55301	(-0.07064144+0.04051353j)	-21.7838	0.0814344	150.165
5.421	(-0.08392941+0.02045661j)	-21.2711	0.0863865	166.302	2.90252	(-0.06990734+0.03072801j)	-22.3424	0.0763626	156.272	2.72746	(-0.07026982+0.01838655j)	-22.777	0.0726355	165.337	2.88567	(-0.08428016+0.009838424j)	-21.4267	0.0848525	173.342	3.02538	(-0.07522534+0.02684509j)	-21.9521	0.0798718	160.36	2.79882	(-0.06197572+0.0199471j)	-23.7275	0.0651067	162.159	2.83021	(-0.06771246+0.006720677j)	-23.3441	0.0680452	174.332	3.04266	(-0.05724239+0.00683259j)	-24.7842	0.0576487	173.193	3.02279	(-0.05792774+0.03718413j)	-23.2438	0.0688352	147.303	2.57093	(-0.0700844+0.03917815j)	-21.9066	0.0802917	150.794
5.4215	(-0.08168519+0.01748599j)	-21.5625	0.0835358	167.917	2.93071	(-0.06760515+0.02890735j)	-22.6712	0.0735261	156.849	2.73753	(-0.06822517+0.0153653j)	-23.1062	0.069934	167.308	2.92007	(-0.08218033+0.008304877j)	-21.6605	0.0825989	174.229	3.04088	(-0.07352624+0.02459817j)	-22.2104	0.0775318	161.502	2.81875	(-0.06044199+0.01791852j)	-24.0074	0.0630421	163.487	2.85339	(-0.0661132+0.005094523j)	-23.5685	0.0663092	175.594	3.06469	(-0.05465563+0.0044744j)	-25.2183	0.0548385	175.32	3.05991	(-0.05518123+0.03470499j)	-23.7167	0.0651875	147.833	2.58017	(-0.06661255+0.03635751j)	-22.3965	0.0758887	151.374
5.422	(-0.07937509+0.01684248j)	-21.8151	0.0811423	168.02	2.93251	(-0.06422642+0.02698303j)	-23.1398	0.0696643	157.212	2.74386	(-0.06614298+0.01483837j)	-23.3771	0.067787	167.356	2.92091	(-0.07988191+0.005242716j)	-21.9324	0.0800538	176.245	3.07606	(-0.07009434+0.02331637j)	-22.6306	0.0738706	161.601	2.82046	(-0.05744081+0.01534284j)	-24.5163	0.0594546	165.045	2.88058	(-0.0633725+0.003607496j)	-23.9479	0.0634751	176.742	3.08473	(-0.05333607+0.002613714j)	-25.4492	0.0534001	177.194	3.09263	(-0.05227415+0.03269888j)	-24.2001	0.0616588	147.973	2.58261	(-0.06450494+0.03459508j)	-22.7102	0.0731964	151.795
5.4225	(-0.07628995+0.01529854j)	-22.1794	0.0778088	168.661	2.94369	(-0.06209549+0.02471462j)	-23.5002	0.0668331	158.297	2.7628	(-0.06322987+0.01252127j)	-23.8145	0.0644577	168.799	2.94609	(-0.07810041+0.005198451j)	-22.1277	0.0782732	176.192	3.07513	(-0.06812207+0.02191136j)	-22.9067	0.0715592	162.17	2.8304	(-0.05526501+0.01369641j)	-24.8921	0.0569369	166.081	2.89866	(-0.06086106+0.001929955j)	-24.3088	0.0608917	178.184	3.10989	(-0.04971838+0.0006715548j)	-26.0689	0.0497229	179.226	3.12809	(-0.04895373+0.03078914j)	-24.7568	0.0578311	147.832	2.58016	(-0.06047172+0.03264695j)	-23.2581	0.0687216	151.637
5.423	(-0.07484071+0.01491898j)	-22.348	0.0763132	168.726	2.94483	(-0.06001831+0.02334523j)	-23.8225	0.0643987	158.746	2.77063	(-0.06241451+0.01163609j)	-23.9459	0.0634899	169.439	2.95728	(-0.07532415+0.003422203j)	-22.4524	0.0754019	177.399	3.09619	(-0.06641369+0.02030921j)	-23.1666	0.0694496	162.996	2.84482	(-0.05338763+0.013163j)	-25.1949	0.0549864	166.15	2.89986	(-0.06000175+0.0005401398999999999j)	-24.4364	0.0600042	179.484	3.13259	(-0.0488601-0.000252429j)	-26.2208	0.0488608	-179.704	-3.13643	(-0.04842106+0.03014242j)	-24.8769	0.0570365	148.097	2.58479	(-0.05892812+0.03106452j)	-23.5286	0.0666148	152.204
5.4235	(-0.07160991+0.01312549j)	-22.757	0.0728029	169.613	2.96031	(-0.05824692+0.02290885j)	-24.0699	0.0625901	158.53	2.76687	(-0.05859546+0.01044304j)	-24.5069	0.0595188	169.895	2.96522	(-0.07260314+0.001562791j)	-22.7789	0.07262	178.767	3.12007	(-0.06196838+0.01880927j)	-23.7739	0.0647601	163.115	2.8469	(-0.04998625+0.0109015j)	-25.8212	0.0511612	167.697	2.92686	(-0.05750739-0.001110635j)	-24.8039	0.0575181	-178.894	-3.12228	(-0.04623255-0.002511211j)	-26.6882	0.0463007	-176.891	-3.08733	(-0.04356897+0.0273075j)	-25.7775	0.0514194	147.922	2.58173	(-0.05578011+0.02987293j)	-23.9753	0.0632757	151.829
[truncated: 953 more rows]
[truncated: 101 more columns]
